# Supplementary material for: Characterizing the Metabolism of Dehalococcoides with a Constraint-Based Model
Source: PubMed Central journal article supplement (PMC2930330; doi:10.1371/journal.pcbi.1000887), 2010-08-19
Supplement: pcbi.1000887.s002.pdf [file pcbi.1000887.s002.pdf]

## **Supplementary Information - 1**

### **Characterizing the Metabolism of *Dehalococcoides* with a Constraint-based Model**

**M. Ahsanul Islam, Elizabeth A. Edwards, Radhakrishnan Mahadevan\***

Department of Chemical Engineering and Applied Chemistry, University of Toronto  
Toronto, ON M5S 3E5, Canada

\*Corresponding author

Email addresses:

[ahsan.islam@utoronto.ca](mailto:ahsan.islam@utoronto.ca)

[elizabeth.edwards@utoronto.ca](mailto:elizabeth.edwards@utoronto.ca)

[krishna.mahadevan@utoronto.ca](mailto:krishna.mahadevan@utoronto.ca)

**Supplementary information – 1:** This file contains the detailed list of genes, proteins, reactions and metabolites included in the *Dehalococcoides* pan-metabolic-model, *iAI549*. Tables 3-7 are gene correspondences where a unique gene number is provided for each gene in the model (**Model gene number**) so that a gene or corresponding reaction can be located conveniently irrespective of the 4 genomes of interest. Strain VS gene locus names are obtained from Alfred Spormann at Stanford University, CA. A reaction can be associated with more than one gene where some genes are core, some are dispensable and others can be unique. For such instances, 2 additional gene correspondence tables (Table 5 and Table 7) are created for dispensable and unique genes respectively.

## Table of Contents

|                                                                                                                       |     |
|-----------------------------------------------------------------------------------------------------------------------|-----|
| Table 1. List of Non-gene Associated Reactions Included in <i>iAI549</i> .....                                        | 2   |
| Table 2. List of Reannotated Genes of Different <i>Dehalococcoides</i> Strains .....                                  | 4   |
| Table 3. Gene Correspondence for Core Genes Mapped to Reactions of <i>iAI549</i> .....                                | 16  |
| Table 4. Gene Correspondence for Dispensable Genes Mapped to New Reactions of <i>iAI549</i> .....                     | 63  |
| Table 5. Gene Correspondence for Dispensable Genes Mapped to Reactions of <i>iAI549</i> Already Present in Core ..... | 65  |
| Table 6. Gene Correspondence for Unique Genes Mapped to New Reactions of <i>iAI549</i> .....                          | 73  |
| Table 7. Gene Correspondence for Unique Genes Mapped to Reactions of <i>iAI549</i> Already Present in Core .....      | 75  |
| Table 8. Detailed List of Proteins of <i>iAI549</i> .....                                                             | 81  |
| Table 9. List of Reactions of <i>iAI549</i> Associated with Core Genes (Core Reactions) .....                         | 94  |
| Table 10. List of Reactions of <i>iAI549</i> Associated with Dispensable Genes (Dispensable Reactions) .....          | 125 |
| Table 11. List of Reactions of <i>iAI549</i> Associated with Unique Genes (Unique Reactions) .....                    | 127 |
| Table 12. Detailed List of Metabolites of <i>iAI549</i> .....                                                         | 128 |
| Table 13. Core Reductive Dehalogenase Homologous ( <i>rdh</i> ) Genes of <i>iAI549</i> .....                          | 155 |
| Table 14. Dispensable Reductive Dehalogenase Homologous ( <i>rdh</i> ) Genes of <i>iAI549</i> .....                   | 156 |
| Table 15. Unique Reductive Dehalogenase Homologous ( <i>rdh</i> ) Genes of <i>iAI549</i> .....                        | 160 |
| Table 16. List of Core Hypothetical Genes of <i>Dehalococcoides</i> Pan-genome .....                                  | 164 |
| Table 17. List of Exchange Reactions of <i>iAI549</i> .....                                                           | 189 |
| Table 18. Set of Constraints for Simulating <i>Dehalococcoides</i> Growth using <i>iAI549</i> .....                   | 191 |

**Table 1. List of Non-gene Associated Reactions Included in *i*AI549**

| No | Abbreviation | Name                                                                 | Equation                                                    | Subsystem             | Reason for adding                                        |
|----|--------------|----------------------------------------------------------------------|-------------------------------------------------------------|-----------------------|----------------------------------------------------------|
| 1  | AGMT         | agmatinase                                                           | [c] : agm + h2o --> ptrc + urea                             | Amino Acid Metabolism | Required for putrecine synthesis.                        |
| 2  | ALAR         | alanine racemase                                                     | [c] : ala-L <==> ala-D                                      | Amino Acid Metabolism | Required for D-alanine biosynthesis.                     |
| 3  | APSPT        | adenosine 5'-phosphosulfate reductase;                               | [c] : aps + trdrd <==> amp + (2) h + so3 + trdox            | Amino Acid Metabolism | Required for cysteine biosynthesis.                      |
| 4  | G5SADs       | L-glutamate 5-semialdehyde dehydratase (spontaneous)                 | [c] : glu5sa <==> 1pyr5c + h + h2o                          | Amino Acid Metabolism | Spontaneous reaction. Required for proline synthesis.    |
| 5  | HCO3E        | carbonate dehydratase (HCO <sub>3</sub> equilibration reaction)      | [c] : co2 + h2o <==> h + hco3                               | Amino Acid Metabolism | Required for arginine biosynthesis.                      |
| 6  | HSPMS        | Homospermidine synthase                                              | [c] : (2) ptrc --> hspmd + nh4                              | Amino Acid Metabolism | Required for homospermidine synthesis.                   |
| 7  | METS         | methionine synthase                                                  | [c] : 5mthf + hcys-L --> h + met-L + thf                    | Amino Acid Metabolism | Required for methionine synthesis.                       |
| 8  | METACH       | O-Acetyl-L-homoserine acetate-lyase (adding methanethiol)            | [c] : achms + h2s <==> ac + hcys-L                          | Amino Acid Metabolism | Required for methionine synthesis.                       |
| 9  | MTHFR1       | 5,10-methylenetetrahydrofolate reductase (NADP)                      | [c] : (2) h + mlthf + nadph --> 5mthf + nadp                | Amino Acid Metabolism | Required for methionine biosynthesis.                    |
| 10 | OIVD1        | 2-oxoisovalerate dehydrogenase (acylating; 4-methyl-2-oxopentanoate) | [c] : 4mop + coa + nad <==> co2 + ivcoa + nadh              | Amino Acid Metabolism | Required for biomass synthesis                           |
| 11 | OIVD2        | 2-oxoisovalerate dehydrogenase (acylating; 3-methyl-2-oxobutanoate)  | [c] : 3mob + coa + nad --> co2 + ibcoa + nadh               | Amino Acid Metabolism | Required for biomass synthesis                           |
| 12 | OIVD3        | 2-oxoisovalerate dehydrogenase (acylating; 3-methyl-2-oxopentanoate) | [c] : 3mop + coa + nad --> 2mbcoa + co2 + nadh              | Amino Acid Metabolism | Required for biomass synthesis                           |
| 13 | OMCDC        | 2-Oxo-4-methyl-3-carboxypentanoate decarboxylation                   | [c] : 3c4mop + h --> 4mop + co2                             | Amino Acid Metabolism | Spontaneous reaction. Required for leucine biosynthesis. |
| 14 | SULR         | sulfite reductase (NADPH <sub>2</sub> )                              | [c] : (3) h2o + h2s + (3) nadp <==> (4) h + (3) nadph + so3 | Amino Acid Metabolism | Required for cystein biosynthesis.                       |

| No | Abbreviation | Name                                             | Equation                                                                              | Subsystem                                  | Reason for adding                                                                            |
|----|--------------|--------------------------------------------------|---------------------------------------------------------------------------------------|--------------------------------------------|----------------------------------------------------------------------------------------------|
| 15 | X00005       | Lumped reaction for degradation of glycoaldehyde | $[c] : \text{coa} + \text{gcald} \rightarrow \text{accoa} + \text{h}_2\text{o}$       | Cofactor and Prosthetic Group Biosynthesis | Required for glycolaldehyde degradation so that 5,6,7,8-tetrahydrofolate can be synthesized. |
| 16 | ATPM         | ATP maintenance requirement                      | $[c] : \text{atp} + \text{h}_2\text{o} \rightarrow \text{adp} + \text{h} + \text{pi}$ | Energy Metabolism                          | Modeling requirement                                                                         |
| 17 | ACt6         | acetate transport in/out via proton symport      | $\text{ac}[e] + \text{h}[e] \rightleftharpoons \text{ac}[c] + \text{h}[c]$            | Transport                                  | Acetate is the carbon source for <i>Dehalococcoides</i>                                      |
| 18 | CO2t         | CO2 transport out via diffusion                  | $\text{co}_2[e] \rightleftharpoons \text{co}_2[c]$                                    | Transport                                  | Diffusion process                                                                            |
| 19 | H2Ot5        | H2O transport via diffusion                      | $\text{h}_2\text{o}[e] \rightleftharpoons \text{h}_2\text{o}[c]$                      | Transport                                  | Diffusion process                                                                            |
| 20 | H2td         | Hydrogen transport                               | $\text{h}_2[c] \rightleftharpoons \text{h}_2[e]$                                      | Transport                                  | Diffusion process                                                                            |
| 21 | N2t          | Nitrogen transport                               | $\text{n}_2[c] \rightleftharpoons \text{n}_2[e]$                                      | Transport                                  | Diffusion process, required for N2 fixation                                                  |

**Table 2. List of Reannotated Genes of Different *Dehalococcoides* Strains**

| No | CBDB1 gene locus | 195 gene locus | BAV1 gene locus | VS gene locus | Primary annotation                                           | Putative reannotation                 | Model protein | Model reaction  | Reason for reannotation                                                                                                                                                                           | Confidence level* |
|----|------------------|----------------|-----------------|---------------|--------------------------------------------------------------|---------------------------------------|---------------|-----------------|---------------------------------------------------------------------------------------------------------------------------------------------------------------------------------------------------|-------------------|
| 1  | cbdbA143         | DET0123        | DehaBAV1_0247   | VS131         | pyridine nucleotide-disulphide oxidoreductase family protein | Glutamate synthase small chain        | GlxB          | GLUSy           | Assigned based on 28% sequence identity with <i>G. sulfurreducens</i> in IMG, JGI, 25% in PDB, 30% in SWISSPROT, GO annotation and synteny in IMG, JGI. Required for glutamate synthesis          | 2                 |
| 2  | cbdbA182         | DET0153        | DehaBAV1_0217   | VS162         | hypothetical protein                                         | 4-carboxymuconolactone decarboxylase  | PcaC2         | CMLDC           | Assigned based on 30% sequence identity with <i>Desulfatibacillum alkenivorans</i> AK-01 in IMG, JGI and in SWISSPROT, 31% with <i>Ruegeria pomeroyi</i> DSS-3 in GO database.                    | 2                 |
| 3  | cbdbA196         | DET0189        | DehaBAV1_0164   | VS177         | putative methyltransferase                                   | Asparagine synthetase                 | AsnA          | ASNS2           | Assigned based on 29% sequence identity with <i>Streptococcus pneumoniae</i> SP19-BS75 in IMG, JGI, and EC equivalents (TIGR protein family) in IMG, JGI. Also required for asparagine synthesis. | 1                 |
| 4  | cbdbA247         | DET0240        | No gene         | VS78          | precorrin methylase                                          | precorrin-6Y C5,15-methyltransferase  | CbiE          | CPC6MT          | Assigned based on 23% sequence identity with <i>Clostridium kluyveri</i> DSM 555 in IMG, JGI, 26% with <i>Methanococcus jannaschii</i> in SWISSPROT and on GO annotation.                         | 1                 |
| 5  | cbdbA254         | DET0246        | No gene         | VS72          | cobalamin biosynthesis protein                               | Adenosylcobinamide-phosphate synthase | CbiD          | ADCOBAS, ADCPS2 | Assigned based on 36% sequence identity with <i>Pseudomonas putida</i> KT2440 in IMG, JGI, and SWISSPROT.                                                                                         | 2                 |
| 6  | cbdbA259         | DET0250        | No gene         | VS68          | putative precorrin methylase                                 | Vitamin B12 transport protein         | BtuF          | CBL1abc         | Assigned based on 28% sequence identity with <i>Burkholderia oklahomensis</i> EO147 in IMG-JGI and SWISSPROT, 28% in PDB with <i>E.coli</i> and GO annotation.                                    | 1                 |
| 7  | cbdbA260         | DET0297        | No gene         | No gene       | conserved hypothetical protein                               | Pyridoxamine 5'-phosphate oxidase     | PdxHec        | PYAM5PO, PDX5PO | Assigned based on 29% sequence identity with <i>Methanococcus aeolicus</i> Nankai-3 in IMG-JGI, SWISSPROT and in PDB.                                                                             | 1                 |

| No | CBDB1 gene locus | 195 gene locus | BAV1 gene locus | VS gene locus | Primary annotation                       | Putative reannotation                     | Model protein | Model reaction | Reason for reannotation                                                                                                                                                                                                              | Confidence level* |
|----|------------------|----------------|-----------------|---------------|------------------------------------------|-------------------------------------------|---------------|----------------|--------------------------------------------------------------------------------------------------------------------------------------------------------------------------------------------------------------------------------------|-------------------|
| 8  | cbdbA327         | DET0380        | DehaBAV1_0362   | VS324         | pyridoxine biosynthesis protein          | Pyridoxamine 5'-phosphate synthase        | PdxAJ         | PDX5PS         | Assigned based on 64% sequence identity with <i>Clostridium kluyveri</i> DSM 555 in IMG-JGI, 66% with <i>Geobacillus</i> sp. H6a in SWISSPROT, 67% in PDB and GO annotation.                                                         | 3                 |
| 9  | cbdbA331         | DET0386        | DehaBAV1_0366   | VS329         | conserved hypothetical protein TIGR00096 | Uroporphyrinogen III cosynthase           | HemD          | UPP3MT, UPP3S  | Assigned based on 24% sequence identity in Swissprot curated database with <i>Clostridium josui</i> , 24% with <i>Thermus thermophilus</i> in PDB, 51% with <i>Nostoc punctiforme</i> PCC 73102 in IMG, JGI.                         | 1                 |
| 10 | cbdbA359         | DET0407        | DehaBAV1_0386   | VS350         | conserved domain protein                 | Mannose-1-phosphate guanylyltransferase   | ManC          | MAN1PT2        | Assigned based on 62% sequence identity with <i>Salmonella enterica</i> in SWISSPROT.                                                                                                                                                | 3                 |
| 11 | cbdbA367         | DET0414        | DehaBAV1_0393   | VS357         | conserved hypothetical protein           | Diacylglycerol kinase                     | DgkA          | DAGK           | Assigned based on EC equivalents (TIGR protein family) and high sequence identity with <i>Dehalococcoides</i> BAV1, VS; 33% identity with <i>Anaeromyxobacter</i> sp. (strain Fw109-5) in IMG and SWISSPROT and 31% identity in PDB. | 2                 |
| 12 | cbdbA381         | DET0428        | DehaBAV1_0405   | VS370         | transcriptional regulator                | Pantothenate kinase                       | CoaA          | PNTK           | Assigned based on 47% sequence identity in PDB, 46% with <i>B. subtilis</i> and 49% with <i>G. sulfurreducens</i> in SWISSPROT, and GO annotation.                                                                                   | 3                 |
| 13 | cbdbA392         | DET0438        | DehaBAV1_0415   | VS380         | metallo-beta-lactamase family protein    | Hydroxyacylglutathione hydrolase          | GloB          | GLYOX          | Assigned based on EC equivalents (TIGR protein family), 29% sequence identity with <i>E. coli</i> , 33% with <i>Bacillus cereus</i> ATCC 14579, and 26% in PDB.                                                                      | 2                 |
| 14 | cbdbA400         | DET0444        | DehaBAV1_0421   | VS386         | conserved hypothetical protein           | Glucose 1-phosphate adenyltransferase     | GlgC          | GLGC           | Assigned based on 45% sequence identity with <i>Erythrobacter</i> sp. NAP1 and EC equivalents in KEGG.                                                                                                                               | 3                 |
| 15 | cbdbA416         | DET0456        | DehaBAV1_0433   | VS398         | MutT                                     | ADP-ribose disphosphatase/pyrophosphatase | NudF          | ADPRDP         | Assigned based on 39% sequence identity with <i>Bacillus</i> sp. SG-1 in SWISSPROT and IMG, 34% in PDB, EC equivalents and GO annotation.                                                                                            | 3                 |

| No | CBDB1 gene locus | 195 gene locus | BAV1 gene locus | VS gene locus | Primary annotation                                     | Putative reannotation                                           | Model protein | Model reaction | Reason for reannotation                                                                                                                                                                     | Confidence level* |
|----|------------------|----------------|-----------------|---------------|--------------------------------------------------------|-----------------------------------------------------------------|---------------|----------------|---------------------------------------------------------------------------------------------------------------------------------------------------------------------------------------------|-------------------|
| 16 | cbdbA417         | DET0457        | DehaBAV1_0434   | VS399         | acetyltransferase, GNAT family                         | N-acetylglutamate synthase                                      | ArgA          | ACGS           | Assigned based on 49% sequence identity with <i>Pelotomaculum thermopropionicum</i> SI in IMG-JGI, 56% with <i>Pelobacter carbinolicus</i> in SWISSPROT, 24% in PDB and GO annotation.      | 3                 |
| 17 | cbdbA419         | DET0458        | DehaBAV1_0435   | VS400         | inorganic polyphosphate                                | NAD kinase                                                      | NadK          | NADK           | Assigned based on 38% sequence identity with <i>G. sulfurreducens</i> in IMG-JGI, SWISSPROT, 33% in PDB and GO annotation.                                                                  | 3                 |
| 18 | cbdbA472         | DET0509        | DehaBAV1_0485   | VS450         | SIS domain protein                                     | Mannose-6-phosphate isomerase and glucose-6-phosphate isomerase | Pgi, ManA     | MAN6PI, PGI    | Assigned based on EC equivalents (TIGR protein family), annotation provided by JGI, IMG, 28% sequence identity with <i>Metallosphaera sedula</i> DSM 5348 and 25% sequence identity in PDB. | 1                 |
| 19 | cbdbA484         | DET0518        | DehaBAV1_0494   | VS459         | translation initiation factor, putative, aIF-2B family | 5-methylthioribose-1-phosphate isomerase                        | YkrS          | MTRI           | Assigned based on 58% sequence identity with <i>Geobacter metallireducens</i> , 50% with <i>Desulfuromonas acetoxidans</i> DSM 684 in IMG-JGI and SWISSPROT, GO annotation and 56% in PDB.  | 3                 |
| 20 | cbdbA490         | DET0523        | DehaBAV1_0499   | VS464         | acetyltransferase, GNAT family                         | N-acetylglutamate synthase                                      | ArgA          | ACGS           | Assigned based on 49% sequence identity with <i>Pelotomaculum thermopropionicum</i> SI in IMG-JGI, 56% with <i>Pelobacter carbinolicus</i> in SWISSPROT, 24% in PDB and GO annotation.      | 3                 |
| 21 | cbdbA514         | DET0540        | DehaBAV1_0516   | VS481         | replicative DNA helicase                               | Dihydroneopterin triphosphate pyrophosphorylase                 | NtpA          | DNMPPA, DNTPPA | Assigned based on EC equivalents and 33% sequence identity with <i>Campylobacter concisus</i> 13826.                                                                                        | 2                 |
| 22 | cbdbA520         | DET0545        | DehaBAV1_0521   | VS486         | amidohydrolase family protein                          | Pantetheine hydrolase/succinyl-diaminopimelate desuccinylase    | DapE, Phyd    | SDPDS, PNTEH   | Assigned based on 36% sequence identity with <i>Geobacter sulfurreducens</i> in IMG-JGI, SWISSPROT and EC equivalents.                                                                      | 2                 |
| 23 | cbdbA553         | DET0576        | DehaBAV1_0549   | VS515         | aminotransferase, classes I and II                     | Aspartate aminotransferase                                      | AspC          | ASPTA1         | Assigned based on 34% sequence identity with <i>Korarchaeum cryptofilum</i> (strain OPF8) in SWISSPROT and 24% in PDB.                                                                      | 2                 |

| No | CBDB1 gene locus | 195 gene locus | BAV1 gene locus | VS gene locus | Primary annotation                               | Putative reannotation                     | Model protein | Model reaction | Reason for reannotation                                                                                                                                                                                                                                                                                                                                                    | Confidence level* |
|----|------------------|----------------|-----------------|---------------|--------------------------------------------------|-------------------------------------------|---------------|----------------|----------------------------------------------------------------------------------------------------------------------------------------------------------------------------------------------------------------------------------------------------------------------------------------------------------------------------------------------------------------------------|-------------------|
| 24 | cbdbA610         | DET0624        | DehaBAV1_0597   | VS565         | response regulator                               | Adenylate cyclase                         | CyaA          | ADNCYC         | Assigned based on EC equivalents and 32% sequence identity with <i>Beggiatoa</i> sp. PS, 29% with <i>Ralstonia eutropha</i> JMP134 in IMG-JGI and SWISSPROT.                                                                                                                                                                                                               | 1                 |
| 25 | cbdbA637         | DET0687        | DehaBAV1_0623   | VS591         | conserved hypothetical protein                   | Adenosylcobinamide hydrolase              | CbiZ          | ADCOBHS        | Added based on 29% sequence identity with <i>Rhodobacter sphaeroides</i> 2.4.1 and 36% with <i>Methanocaldococcus jannaschii</i> DSM 2661.                                                                                                                                                                                                                                 | 2                 |
| 26 | cbdbA667         | DET0711        | DehaBAV1_0646   | VS618         | carbohydrate kinase, PfkB family                 | Ribokinase                                | RbsK          | RBK            | Assigned based on 28% sequence identity in PDB, 32% with <i>Methanosphaera stadtmanae</i> in SWISSPROT and GO annotation                                                                                                                                                                                                                                                   | 2                 |
| 27 | cbdbB16          | DET0724        | DehaBAV1_0656   | VS630         | pyruvic-ferredoxin oxidoreductase, gammasubunit  | Pyruvate synthase/2-oxoglutarate synthase | Ofo, Pfor     | OOR2r, POR2    | Assigned based on 50% sequence identity with <i>Moorella thermoacetica</i> , 50% with <i>M. barkeri</i> in swissprot, 46% in PDB with <i>Thermotoga maritima</i> and GO annotation. For 2-oxoglutarate synthase, function assigned based on Based on 41% sequence identity with <i>Thermoproteus tenax</i> in swissprot, 39% with <i>W. succinogens</i> and GO annotation. | 3                 |
| 28 | cbdbA680         | DET0725        | DehaBAV1_0657   | VS631         | pyruvic-ferredoxin oxidoreductase, delta subunit | Pyruvate synthase/2-oxoglutarate synthase | Ofo, Pfor     | OOR2r, POR2    | Assigned based on 50% sequence identity with <i>Moorella thermoacetica</i> , 50% with <i>M. barkeri</i> in swissprot, 46% in PDB with <i>Thermotoga maritima</i> and GO annotation. For 2-oxoglutarate synthase, function assigned based on Based on 41% sequence identity with <i>Thermoproteus tenax</i> in swissprot, 39% with <i>W. succinogens</i> and GO annotation. | 3                 |



| No | CBDB1 gene locus | 195 gene locus | BAV1 gene locus | VS gene locus | Primary annotation                               | Putative reannotation                                            | Model protein    | Model reaction                                                    | Reason for reannotation                                                                                                                                                                                                                                                                                                                                                                                                                                                                                                                                                                         | Confidence level* |
|----|------------------|----------------|-----------------|---------------|--------------------------------------------------|------------------------------------------------------------------|------------------|-------------------------------------------------------------------|-------------------------------------------------------------------------------------------------------------------------------------------------------------------------------------------------------------------------------------------------------------------------------------------------------------------------------------------------------------------------------------------------------------------------------------------------------------------------------------------------------------------------------------------------------------------------------------------------|-------------------|
| 29 | cbdbA681         | DET0726        | DehaBAV1_0658   | VS632         | pyruvic-ferredoxin oxidoreductase, alpha subunit | Pyruvate synthase/2-oxoglutarate synthase/pyruvate dehydrogenase | Ofo, Pfor, PdhAB | OOR2r, PDH, POR2                                                  | Assigned based on 50% sequence identity with <i>Moorella thermoacetica</i> , 50% with <i>M. barkeri</i> in swissprot, 46% in PDB with <i>Thermotoga maritima</i> and GO annotation. For 2-oxoglutarate synthase, function assigned based on Based on 41% sequence identity with <i>Thermoproteus tenax</i> in swissprot, 39% with <i>W. succinogens</i> and GO annotation. For pyruvate dehydrogenase, function assigned based on EC equivalents and 28% sequence identity with <i>Syntrophus aciditrophicus</i> SB, 27% sequence identity in PDB with archaeon <i>Pyrobaculum aerophilum</i> . | 3                 |
| 30 | cbdbA682         | DET0727        | DehaBAV1_0659   | VS633         | pyruvic-ferredoxin oxidoreductase, beta subunit  | Pyruvate synthase/2-oxoglutarate synthase                        | Ofo, Pfor        | OOR2r, POR2                                                       | Assigned based on 50% sequence identity with <i>Moorella thermoacetica</i> , 50% with <i>M. barkeri</i> in swissprot, 46% in PDB with <i>Thermotoga maritima</i> and GO annotation. For 2-oxoglutarate synthase, function assigned based on Based on 41% sequence identity with <i>Thermoproteus tenax</i> in swissprot, 39% with <i>W. succinogens</i> and GO annotation.                                                                                                                                                                                                                      | 3                 |
| 31 | cbdbA689         | DET0736        | DehaBAV1_0666   | VS642         | oxidoreductase, short chaindehydrogenase         | 3-oxoacyl [acyl-carrier-protein] reductase                       | FabG1            | HDER4, HBUR1, HTDR6, HDDR5, HICR9, HOCHR3, HHYR2, HHDR7, HODR8_#1 | Assigned based on 43% sequence identity with <i>Desulfitobacterium hafniense</i> in IMG-JGI, SWISSPROT, 38% in PDB and GO annotation.                                                                                                                                                                                                                                                                                                                                                                                                                                                           | 3                 |
| 32 | cbdbA730         | DET0758        | DehaBAV1_0685   | VS664         | conserved hypothetical protein                   | succinyl-diaminopimelate desuccinylase                           | DapE             | SDPDS                                                             | Assigned based on 37% sequence identity with <i>Haemophilus influenzae</i> PittHH in IMG-JGI and EC equivalents.                                                                                                                                                                                                                                                                                                                                                                                                                                                                                | 2                 |

| No | CBDB1 gene locus | 195 gene locus | BAV1 gene locus | VS gene locus | Primary annotation                                  | Putative reannotation                   | Model protein | Model reaction | Reason for reannotation                                                                                                                                                                 | Confidence level* |
|----|------------------|----------------|-----------------|---------------|-----------------------------------------------------|-----------------------------------------|---------------|----------------|-----------------------------------------------------------------------------------------------------------------------------------------------------------------------------------------|-------------------|
| 33 | cbdbA762         | DET0785        | DehaBAV1_0711   | VS691         | metallo-beta-lactamase family protein               | Hydroxyacylglutathione hydrolase        | GloB          | GLYOX          | Assigned based on EC equivalents (TIGR protein family), 29% sequence identity with <i>E. coli</i> , 33% with <i>Bacillus cereus</i> ATCC 14579, and 26% in PDB.                         | 2                 |
| 34 | cbdbA802         | DET0824        | DehaBAV1_0743   | VS728         | probable nitroreductase family protein              | Glucose 1-phosphate adenylyltransferase | GlgC          | GLGC           | Assigned based on 25% sequence identity with <i>Thermus thermophilus</i> HB27 in IMG-JGI and EC equivalents (TIGR protein family) in KEGG pathways provided by IMG-JGI.                 | 1                 |
| 35 | cbdbA841         | DET0859        | DehaBAV1_0777   | VS762         | GTP-binding protein LepA                            | Sulfate adenylyltransferase             | CysH          | SADT2          | Assigned based on EC equivalents (TIGR protein family) in KEGG pathways provided by IMG-JGI.                                                                                            | 1                 |
| 36 | cbdbA849         | DET0866        | DehaBAV1_0784   | VS769         | putative hydrogenase subunit                        | Glutamate synthase                      | GltB          | GLUSy          | Assigned based on 28% sequence identity with <i>G. sulfurreducens</i> in IMG, JGI, 25% in PDB, 30% in SWISSPROT, GO annotation and synteny in IMG, JGI.                                 | 1                 |
| 37 | cbdbA894         | DET0940        | DehaBAV1_0824   | VS811         | acyl-CoA synthetase (AMP-forming) / AMP-acid ligase | Phenylacetate-CoA ligase                | PaaK          | PACCOA<br>L    | Assigned based on 30% sequence identity with <i>G. sulfurreducens</i> , 30% with <i>E. coli</i> in IMG-JGI, 37% with <i>Desulfovibrio desulfuricans</i> in SWISSPROT and GO annotation. | 2                 |

| No | CBDB1 gene locus | 195 gene locus | BAV1 gene locus | VS gene locus | Primary annotation                                  | Putative reannotation            | Model protein | Model reaction                                                                   | Reason for reannotation                                                                                                                                                                 | Confidence level* |
|----|------------------|----------------|-----------------|---------------|-----------------------------------------------------|----------------------------------|---------------|----------------------------------------------------------------------------------|-----------------------------------------------------------------------------------------------------------------------------------------------------------------------------------------|-------------------|
| 38 | cbdbA901         | DET0946        | DehaBAV1_0830   | VS817         | acyl-CoA synthetase (AMP-forming) / AMP-acid ligase | Long chain fatty acid-CoA ligase | FadD          | FACOAL181, FACOAL140, FACOAL160, FACOAL120, FACOAL170(ISO), FACOAL180, FACOAL200 | Assigned based on 25% sequence identity with <i>Thermus thermophilus</i> HB8 in PDB, with <i>G. sulfurreducens</i> and <i>B. subtilis</i> in IMG-JGI.                                   | 1                 |
| 39 | cbdbA942         | DET0978        | DehaBAV1_0869   | VS851         | glycosyl transferase, group 1 family protein        | Glycogen synthase                | GlgA1         | GLCS1                                                                            | Assigned based on 27% sequence identity in PDB, 28% with <i>Thermoanaerobacter pseudethanolicus</i> ATCC 33223 in IMG-JGI and GO annotation.                                            | 1                 |
| 40 | cbdbA963         | DET1002        | DehaBAV1_0890   | VS874         | glycosyl transferase, group 1 family protein        | Glycogen synthase                | GlgA1         | GLCS1                                                                            | Assigned based on 27% sequence identity in PDB, 28% with <i>Thermoanaerobacter pseudethanolicus</i> ATCC 33223 in IMG-JGI and GO annotation.                                            | 1                 |
| 41 | cbdbA988         | DET1015        | DehaBAV1_0902   | VS886         | acyl-CoA synthetase (AMP-forming) / AMP-acid ligase | Phenylacetate-CoA ligase         | PaaK          | PACCOAL                                                                          | Assigned based on 30% sequence identity with <i>G. sulfurreducens</i> , 30% with <i>E. coli</i> in IMG-JGI, 37% with <i>Desulfovibrio desulfuricans</i> in SWISSPROT and GO annotation. | 2                 |

| No | CBDB1 gene locus | 195 gene locus | BAV1 gene locus | VS gene locus | Primary annotation                                          | Putative reannotation            | Model protein | Model reaction                                                                   | Reason for reannotation                                                                                                                                                                                   | Confidence level* |
|----|------------------|----------------|-----------------|---------------|-------------------------------------------------------------|----------------------------------|---------------|----------------------------------------------------------------------------------|-----------------------------------------------------------------------------------------------------------------------------------------------------------------------------------------------------------|-------------------|
| 42 | cbdbA1006        | DET1033        | DehaBAV1_0916   | VS904         | acyl-CoA synthetase (AMP-forming) / AMP-acid ligase         | Long chain fatty acid-CoA ligase | FadD          | FACOAL181, FACOAL140, FACOAL160, FACOAL120, FACOAL170(ISO), FACOAL180, FACOAL200 | Assigned based on 25% sequence identity with <i>Thermus thermophilus</i> HB8 in PDB, with <i>G. sulfurreducens</i> and <i>B. subtilis</i> in IMG-JGI.                                                     | 1                 |
| 43 | cbdbA1008        | DET1035        | DehaBAV1_0917   | VS905         | pyridoxal-phosphate dependent TrpB-like enzyme              | Tryptophan synthase beta subunit | TrpB          | TRPS1                                                                            | Assigned based on 63% sequence identity with <i>Methanospirillum hungatei</i> JF-1 in IMG-JGI, 61% with <i>Methanoculleus marisnigri</i> strain ATCC 35101 in SWISSPROT, 33% in PDB and on GO annotation. | 3                 |
| 44 | cbdbA1054        | DET1127        | DehaBAV1_0956   | VS945         | conserved hypothetical protein                              | Glutamate synthase small chain   | GltB          | GLUSy                                                                            | Assigned based on 28% sequence identity with <i>G. sulfurreducens</i> in IMG, JGI, 25% in PDB, 30% in SWISSPROT, GO annotation and synteny in IMG, JGI.                                                   | 1                 |
| 45 | cbdbA1058        | DET1130        | DehaBAV1_0959   | VS948         | glutamine amidotransferase, class II                        | Glutamate synthase small chain   | GltB          | GLUSy                                                                            | Assigned based on 28% sequence identity with <i>G. sulfurreducens</i> in IMG, JGI, 25% in PDB, 30% in SWISSPROT, GO annotation and synteny in IMG, JGI.                                                   | 1                 |
| 46 | cbdbA1059        | DET1131        | DehaBAV1_0960   | VS949         | pyridine nucleotide-disulfide oxidoreductase family protein | Nitrite reductase                | NasDE         | NTRIRy, NTRIRx                                                                   | Assigned based on 30% sequence identity with <i>Bacillus halodurans</i> C-125 in IMG-JGI and SWISSPROT, 33% in PDB, and GO annotation.                                                                    | 2                 |

| No | CBDB1 gene locus | 195 gene locus | BAV1 gene locus | VS gene locus | Primary annotation                       | Putative reannotation                                                                             | Model protein | Model reaction                                                                                  | Reason for reannotation                                                                                                                                                                         | Confidence level* |
|----|------------------|----------------|-----------------|---------------|------------------------------------------|---------------------------------------------------------------------------------------------------|---------------|-------------------------------------------------------------------------------------------------|-------------------------------------------------------------------------------------------------------------------------------------------------------------------------------------------------|-------------------|
| 47 | cbdbA1061        | DET1133        | DehaBAV1_0962   | VS951         | iron-sulfur cluster-binding protein      | Glutamate synthase small chain                                                                    | GitB          | GLUSy                                                                                           | Assigned based on 33% sequence identity with <i>E.coli</i> ATC 8739 in IMG-JGI and SWISSPROT.                                                                                                   | 2                 |
| 48 | cbdbA1070        | DET1140        | DehaBAV1_0969   | VS958         | carbon-nitrogen hydrolase family protein | NAD synthase                                                                                      | NadE          | NADS1                                                                                           | Assigned based on 30% sequence identity with <i>Methylobacillus flagellatus</i> strain KT in SWISSPROT, 23% with <i>Psychrobacter arcticus</i> 273-4 in IMG-JGI and GO annotation.              | 1                 |
| 49 | cbdbA1077        | 0              | DehaBAV1_0975   | No gene       | GCN5-related N-acetyltransferase         | Succinyl-CoA synthetase/long chain fatty acid-CoA ligase                                          | FadD, SucCD1  | SUCOAS, FACOAL1 60, FACOAL2 00, FACOAL1 81, FACOAL1 70(ISO), FACOAL1 40, FACOAL1 80, FACOAL1 20 | Assigned based on 35% sequence identity with <i>Thermoplasma volcanium</i> GSS1, evidence in Pfam and InterPro databases as well as EC equivalents found in KEGG pathways provided by IMG, JGI. | 2                 |
| 50 | cbdbA1098        | DET1184        | DehaBAV1_0995   | VS967         | BioY family protein                      | Biotin synthase                                                                                   | BioBec        | BTS                                                                                             | Assigned based on 35% sequence identity with <i>Methanosarcina barkeri</i> fusaro in IMG-JGI and SWISSPROT and EC equivalents (TIGR protein family) in KEGG pathways provided by IMG-JGI.       | 2                 |
| 51 | cbdbA1111        | DET1196        | DehaBAV1_1007   | VS979         | ATP-dependent DNA helicase PcrA          | Dihydroneopterin triphosphate pyrophosphorylase/UDP-N-acetylglucosamine 1-carboxyvinyltransferase | NtpA, MurAA   | DNMPPA, UAGCVT, DNTPPA                                                                          | Assigned based on EC equivalents and 33% sequence identity with <i>Campylobacter concisus</i> 13826.                                                                                            | 2                 |

| No | CBDB1 gene locus | 195 gene locus | BAV1 gene locus | VS gene locus | Primary annotation                             | Putative reannotation                                                         | Model protein | Model reaction | Reason for reannotation                                                                                                                            | Confidence level* |
|----|------------------|----------------|-----------------|---------------|------------------------------------------------|-------------------------------------------------------------------------------|---------------|----------------|----------------------------------------------------------------------------------------------------------------------------------------------------|-------------------|
| 52 | cbdbA1112        | DET1198        | DehaBAV1_1008   | VS981         | pyrimidine operon regulatory protein           | Uracil phosphoribosyltransferase                                              | Upp2          | UPPRT          | Assigned based on 61% sequence identity with <i>Moorella thermoacetica</i> in IMG-JGI, SWISSPROT and 56% in PDB.                                   | 3                 |
| 53 | cbdbA1125        | DET1208        | DehaBAV1_1018   | VS991         | nucleotidyl transferase family protein         | Mannose-1-phosphate guanylyltransferase/Glucose-1-phosphate adenyltransferase | Mpg, GlgC     | MAN1PT1, GLGC  | Assigned based on 34% sequence identity with <i>Geobacter sulfurreducens</i> in IMG-JGI, SWISSPROT and GO annotation.                              | 2                 |
| 54 | cbdbA1136        | DET1218        | DehaBAV1_1028   | VS1001        | HAD-superfamily hydrolase, subfamily IIB       | Phosphoserine phosphatase                                                     | SerB          | PSP_L          | Assigned based on 50% sequence identity with <i>Pelobacter carbinolicus</i> DSM 2380 in IMG-JGI and 46% sequence identity in PDB.                  | 3                 |
| 55 | cbdbA1140        | DET1223        | DehaBAV1_1032   | VS1005        | fumarylacetoacetate hydrolase family protein   | Acylpyruvate hydrolase                                                        | P_3.7.1.5     | APYRH          | Assigned based on 37% sequence identity with <i>Geobacter sulfurreducens</i> , 33% with <i>E.coli</i> in IMG-JGI and 34% sequence identity in PDB. | 2                 |
| 56 | cbdbA1142        | DET1225        | DehaBAV1_1034   | VS1007        | conserved hypothetical protein                 | Fructose-1,6-bisphosphatase                                                   | Fbp           | FBP            | Assigned based on 68% sequence identity with <i>Moorella thermoacetica</i> in IMG-JGI, SWISSPROT, 60% in PDB and GO annotation.                    | 3                 |
| 57 | cbdbA1143        | DET1226        | DehaBAV1_1035   | VS1008        | non-canonical purine NTP pyrophosphatase, RdgB | dITP/XTP pyrophosphatase                                                      | IxpP          | XTPASE, ITPASE | Assigned based on 47% sequence identity with <i>Escherichia coli</i> K12 in IMG-JGI, SWISSPROT and 44% in PDB.                                     | 3                 |
| 58 | cbdbA1194        | DET1268        | DehaBAV1_1079   | VS1051        | ATP-dependent DNA helicase RecG                | Dihydroneopterin triphosphate pyrophosphorylase                               | NtpA          | DNMPPA, DNTPPA | Assigned based on EC equivalents and 33% sequence identity with <i>Campylobacter concisus</i> 13826.                                               | 2                 |
| 59 | cbdbA1237        | DET1298        | DehaBAV1_1109   | VS1081        | GTP-binding protein TypA                       | Sulfate adenyltransferase                                                     | CysH          | SADT2          | Assigned based on EC equivalents (TIGR protein family) in KEGG pathways provided by IMG-JGI.                                                       | 1                 |

| No | CBDB1 gene locus | 195 gene locus | BAV1 gene locus | VS gene locus | Primary annotation                   | Putative reannotation                                      | Model protein | Model reaction                          | Reason for reannotation                                                                                                                                                     | Confidence level* |
|----|------------------|----------------|-----------------|---------------|--------------------------------------|------------------------------------------------------------|---------------|-----------------------------------------|-----------------------------------------------------------------------------------------------------------------------------------------------------------------------------|-------------------|
| 60 | cbdbA1238        | DET1299        | DehaBAV1_1110   | VS1082        | major facilitator family transporter | Proline/betaine transporter                                | ProPec        | GLYBt6, PROt6                           | Assigned based on 32% sequence identity with <i>E. coli</i> in Transport Classification database (TCDB).                                                                    | 2                 |
| 61 | cbdbA1269        | DET1324        | DehaBAV1_1135   | VS1106        | conserved hypothetical protein       | UDP-glucose-4-epimerase                                    | GalE          | UDPG4E                                  | Assigned based on EC equivalents (TIGR protein family) in IMG-JGI, 27% sequence identity with <i>E. coli</i> in IMG-JGI and 25% sequence identity in PDB.                   | 1                 |
| 62 | cbdbA1338        | No gene        | DehaBAV1_1193   | VS1164        | L-aspartate oxidase( EC:1.4.3.16 )   | L-aspartate oxidase( EC:1.4.3.16 )/succinate dehydrogenase | Frd, NadB     | FRD5, ASPO1, ASPO3, ASPO4, ASPO5, ASPO6 | Assigned based on 35% sequence identity with <i>Geobacter metallireducens</i> , 25% identity with <i>Geobacter sulfurreducens</i> and 40% identity in PDB.                  | 2                 |
| 63 | cbdbA1346        | DET1390        | DehaBAV1_1199   | VS1171        | PAP2 family protein                  | Phosphatidylglycerophosphate phosphohydrolase              | PgpA, Pmdpht  | PMDPHT, PGPPH                           | Assigned based on 29% sequence identity with <i>Bacillus cereus</i> E33L in IMG-JGI SWISSPROT, 32% sequence identity in PDB and strong interaction in string database.      | 1                 |
| 64 | cbdbA1359        | DET1400        | DehaBAV1_1209   | VS1182        | co-chaperone protein GrpE            | Ribonucleoside-triphosphate reductase                      | NrdD          | RNTR2, RNTR3, RNTR1, RNTR4              | Assigned based on EC equivalents, 23% sequence identity with <i>Lactobacillus acidophilus</i> NCFM in IMG-JGI, SWISSPROT and 26% sequence identity in PDB.                  | 1                 |
| 65 | cbdbA1527        | DET1510        | 0               | No gene       | conserved hypothetical protein       | Phosphomethylpyrimidine kinase                             | ThiD          | PMPK                                    | Assigned based on EC equivalents and 33% sequence identity with <i>Campylobacter concisus</i> 13826 in IMG-JGI and SWISSPROT.                                               | 2                 |
| 66 | cbdbA1557        | DET0089        | No gene         | No gene       | radical SAM domain protein           | Pyruvate formate lyase                                     | PfIC          | PFLi                                    | Assigned based on 29% sequence identity with <i>Methanopyrus kandleri</i> AV19, 35% sequence identity with <i>Vibrio harveyi</i> HY01 in IMG-JGI, SWISSPROT and 25% in PDB. | 2                 |

| No | CBDB1 gene locus | 195 gene locus | BAV1 gene locus | VS gene locus | Primary annotation                   | Putative reannotation                        | Model protein | Model reaction                                         | Reason for reannotation                                                                                                                                   | Confidence level* |
|----|------------------|----------------|-----------------|---------------|--------------------------------------|----------------------------------------------|---------------|--------------------------------------------------------|-----------------------------------------------------------------------------------------------------------------------------------------------------------|-------------------|
| 67 | cbdbA1667        | No gene        | DehaBAV1_1328   | VS1458        | putative dihydroflavonol 4-reductase | UDP-glucose-4-epimerase                      | GalE          | UDPG4E                                                 | Assigned based on EC equivalents (TIGR protein family) in IMG-JGI, 27% sequence identity with <i>E. coli</i> in IMG-JGI and 25% sequence identity in PDB. | 1                 |
| 68 | cbdbA1668        | No gene        | DehaBAV1_1329   | VS1459        | hypothetical protein                 | UDP-glucose-4-epimerase                      | GalE          | UDPG4E                                                 | Assigned based on EC equivalents (TIGR protein family) in IMG-JGI, 27% sequence identity with <i>E. coli</i> in IMG-JGI and 25% sequence identity in PDB. | 1                 |
| 69 | cbdbA1735        | DET1637        | DehaBAV1_1381   | VS1519        | mazG family protein                  | Nucleotide triphosphate pyrophosphohydrolase | MazG          | NTPP5, NTPP2, NTPP4, NTPP6, NTPP8, NTPP1, NTPP7, NTPP3 | Assigned based on 42% sequence identity in PDB, 47% with <i>Moorella thermoacetica</i> in IMG-JGI and SWISSPROT.                                          | 3                 |
| 70 | cbdbA1741        | DET1641        | DehaBAV1_1385   | VS1523        | aldolase, class II                   | L-fucose phosphate aldolase                  | FucA          | FCLPA                                                  | Assigned based on 38% sequence identity with <i>Thermus thermophilus</i> HB8 in PDB, 44% with <i>Methanosarcina mazei</i> Go1 in IMG-JGI and SWISSPROT.   | 3                 |

\* >40% amino acid sequence identity = confidence level 3, >30% identity = confidence level 2, <30% identity = confidence level 1



**Table 3. Gene Correspondence for Core Genes Mapped to Reactions of *iAI549***

| Model gene number | CBDB1 core metabolic genes | 195 core metabolic genes | BAV1 core metabolic genes | VS core metabolic genes | CBDB1 annotation                                        | 195 annotation                                            | BAV1 annotation                                                        | VS annotation                                                            | Model protein | Model reaction      |
|-------------------|----------------------------|--------------------------|---------------------------|-------------------------|---------------------------------------------------------|-----------------------------------------------------------|------------------------------------------------------------------------|--------------------------------------------------------------------------|---------------|---------------------|
| 1                 | cbdbA3                     | DET0003                  | DehaBAV1_0003             | VS3                     | nicotinate (nicotinamide) nucleotidoadenylyltransferase | nicotinate (nicotinamide) nucleotide adenylyltransferase  | nicotinate (nicotinamide) nucleotide adenylyltransferase( EC:3.5.4.4 ) | nicotinate (nicotinamide) nucleotide adenylyltransferase ( EC:2.7.7.18 ) | NadD          | NNATr, NMNATr       |
| 2                 | cbdbA5                     | DET0005                  | DehaBAV1_0005             | VS5                     | GTP pyrophosphokinase                                   | GTP pyrophosphokinase( EC:2.7.6.5 )                       | (p)ppGpp synthetase I, SpoT/RelA( EC:2.7.6.5 )                         | (p)ppGpp synthetase I, SpoT/RelA( EC:2.7.6.5 )                           | RelA          | GTPDK               |
| 3                 | cbdbA7                     | DET0006                  | DehaBAV1_0006             | VS6                     | histidyl-tRNA synthetase                                | histidyl-tRNA synthetase ( EC:6.1.1.21 )                  | histidyl-tRNA synthetase( EC:6.1.1.21 )                                | histidyl-tRNA synthetase( EC:6.1.1.21 )                                  | HisS          | HISTRS              |
| 4                 | cbdbA9                     | DET0007                  | DehaBAV1_0007             | VS7                     | hypothetical protein                                    | hypothetical protein                                      | Saccharopine dehydrogenase                                             | Saccharopine dehydrogenase                                               | Lys1          | SACCD2              |
| 5                 | cbdbA11                    | DET0009                  | DehaBAV1_0009             | VS9                     | branched-chain amino acid aminotransferase              | branched-chain amino acid aminotransferase( EC:2.6.1.42 ) | branched-chain amino acid aminotransferase                             | branched-chain amino acid aminotransferase                               | IlvE          | VALTA, LEUTA, ILETA |
| 6                 | cbdbA14                    | DET0013                  | DehaBAV1_0012             | VS12                    | orotidine 5-phosphate decarboxylase                     | orotidine 5'-phosphate decarboxylase( EC:4.1.1.23 )       | orotidine 5'-phosphate decarboxylase                                   | orotidine 5'-phosphate decarboxylase                                     | PyrF          | OMPDC               |
| 7                 | cbdbA18                    | DET0016                  | DehaBAV1_0015             | VS15                    | putative folylpolyglutamate synthetase                  | folylpolyglutamate synthetase( EC:6.3.2.17 )              | FolC bifunctional protein                                              | FolC bifunctional protein                                                | MetA1, FolC   | HSAT, DHFS          |
| 8                 | cbdbA41                    | DET0034                  | DehaBAV1_0031             | VS32                    | putative phosphate transporter                          | phosphate transporter                                     | phosphate transporter                                                  | phosphate transporter                                                    | PitA          | Plt6                |
| 9                 | cbdbA42                    | DET0035                  | DehaBAV1_0032             | VS33                    | putative guanylate kinase                               | guanylate kinase( EC:2.7.4.8 )                            | Guanylate kinase( EC:2.7.4.8 )                                         | Guanylate kinase( EC:2.7.4.8 )                                           | Gmk           | GK1, DGK1           |
| 10                | cbdbA45                    | DET0037                  | DehaBAV1_0034             | VS35                    | PyrK family protein                                     | PyrK family protein                                       | oxidoreductase FAD/NAD(P)-binding domain protein                       | oxidoreductase FAD/NAD(P)-binding domain protein                         | PyrK          | DHORDf              |

| Model gene number | CBDB1 core metabolic genes | 195 core metabolic genes | BAV1 core metabolic genes | VS core metabolic genes | CBDB1 annotation                                       | 195 annotation                                                        | BAV1 annotation                                                     | VS annotation                                                       | Model protein     | Model reaction        |
|-------------------|----------------------------|--------------------------|---------------------------|-------------------------|--------------------------------------------------------|-----------------------------------------------------------------------|---------------------------------------------------------------------|---------------------------------------------------------------------|-------------------|-----------------------|
| 11                | cbdbA46                    | DET0038                  | DehaBAV1_0035             | VS36                    | glutamate synthase (NADPH), homotetrameric             | glutamate synthase (NADPH), homotetrameric( EC:1.4.1.13 )             | glutamate synthase (NADPH), homotetrameric                          | glutamate synthase (NADPH), homotetrameric                          | GltBD, P_1.18.1.2 | GLUSy, FNOR2          |
| 12                | cbdbA52                    | DET0041                  | DehaBAV1_0038             | VS41                    | SAM-dependent methyltransferase UbiE/COQ5 family       | quinone methyltransferase, UbiE family                                | Methyltransferase type 11                                           | Methyltransferase type 11                                           | UbiE              | OMBZLM                |
| 13                | cbdbA63                    | DET0049                  | DehaBAV1_0046             | VS49                    | transcriptional repressor, ROK family                  | ROK family protein                                                    | ROK family protein                                                  | ROK family protein                                                  | GlcK              | HEX1                  |
| 14                | cbdbA65                    | DET0050                  | DehaBAV1_0047             | VS50                    | alanyl-tRNA synthetase                                 | alanyl-tRNA synthetase( EC:6.1.1.7 )                                  | alanyl-tRNA synthetase( EC:6.1.1.7 )                                | alanyl-tRNA synthetase( EC:6.1.1.7 )                                | AlaS              | ALATRS                |
| 15                | cbdbA69                    | DET0053                  | DehaBAV1_0050             | VS53                    | alcohol dehydrogenase, iron-containing                 | alcohol dehydrogenase, iron-containing                                | iron-containing alcohol dehydrogenase                               | iron-containing alcohol dehydrogenase                               | AdhC              | ALCD19, ALCD2x, ALCD3 |
| 16                | cbdbA74                    | DET0059                  | DehaBAV1_0053             | VS59                    | 2-C-methyl-D-erythritol 4-phosphate cytidyltransferase | 2-C-methyl-D-erythritol 4-phosphate cytidyltransferase( EC:2.7.7.60 ) | 2-C-methyl-D-erythritol 4-phosphate cytidyltransferase              | 2-C-methyl-D-erythritol 4-phosphate cytidyltransferase              | IspD              | MEPCT                 |
| 17                | cbdbA75                    | DET0060                  | DehaBAV1_0054             | VS60                    | 2-C-methyl-D-erythritol 2,4-cyclodiphosphate synthase  | 2C-methyl-D-erythritol 2,4-cyclodiphosphate synthase( EC:4.6.1.12 )   | 2C-methyl-D-erythritol 2,4-cyclodiphosphate synthase( EC:4.6.1.12 ) | 2C-methyl-D-erythritol 2,4-cyclodiphosphate synthase( EC:4.6.1.12 ) | IspF              | MECDPS                |
| 18                | cbdbA76                    | DET0061                  | DehaBAV1_0055             | VS61                    | cysteinyI-tRNA synthetase                              | cysteinyI-tRNA synthetase( EC:6.1.1.16 )                              | cysteinyI-tRNA synthetase( EC:6.1.1.16 )                            | cysteinyI-tRNA synthetase( EC:6.1.1.16 )                            | CysS              | CYSTRS                |
| 19                | cbdbA96                    | DET0318                  | DehaBAV1_0112             | VS1387                  | putative reductive dehalogenase                        | reductive dehalogenase, putative                                      | reductive dehalogenase                                              | reductive dehalogenase                                              | RdhA              | RDR1, RDR2            |
| 20                | cbdbA128                   | DET0109                  | DehaBAV1_0259             | VS119                   | putative Ni/Fe hydrogenase maturation protease         | hydrogenase maturation protease                                       | hydrogenase maturation protease                                     | hydrogenase maturation protease                                     | FrdH              | FRHD                  |

| Model gene number | CBDB1 core metabolic genes | 195 core metabolic genes | BAV1 core metabolic genes | VS core metabolic genes | CBDB1 annotation                                                | 195 annotation                                                     | BAV1 annotation                                          | VS annotation                                            | Model protein   | Model reaction        |
|-------------------|----------------------------|--------------------------|---------------------------|-------------------------|-----------------------------------------------------------------|--------------------------------------------------------------------|----------------------------------------------------------|----------------------------------------------------------|-----------------|-----------------------|
| 21                | cbdbA129                   | DET0110                  | DehaBAV1_0258             | VS120                   | Ni/Fe hydrogenase large subunit                                 | [Ni/Fe] hydrogenase, group 1, large subunit, putative              | nickel-dependent hydrogenase, large subunit              | nickel-dependent hydrogenase, large subunit              | FrdH            | FRHD                  |
| 22                | cbdbA130                   | DET0111                  | DehaBAV1_0257             | VS121                   | Ni/Fe hydrogenase small subunit                                 | [Ni/Fe] hydrogenase, group 1, small subunit, putative              | hydrogenase (NiFe) small subunit HydA( EC:1.12.99.6 )    | hydrogenase (NiFe) small subunit HydA( EC:1.12.99.6 )    | FrdH            | FRHD                  |
| 23                | cbdbA131                   | DET0112                  | DehaBAV1_0256             | VS122                   | putative Ni/Fe hydrogenase, iron-sulfur cluster-binding subunit | [Ni/Fe] hydrogenase, iron-sulfur cluster-binding subunit, putative | 4Fe-4S ferredoxin, iron sulfur binding domain protein    | 4Fe-4S ferredoxin, iron-sulfur binding domain protein    | FrdH            | FRHD                  |
| 24                | cbdbA139                   | DET0119                  | DehaBAV1_0250             | VS128                   | oxaloacetate decarboxylase, alpha subunit                       | oxaloacetate decarboxylase( EC:4.1.1.3 )                           | oxaloacetate decarboxylase alpha subunit                 | oxaloacetate decarboxylase alpha subunit                 | AccC, Pyc, OadD | OXAD2, ACCOAC, PC     |
| 25                | cbdbA141                   | DET0120                  | DehaBAV1_0249             | VS129                   | acetyl-CoA carboxylase, biotin carboxylase                      | acetyl-CoA carboxylase( EC:6.4.1.1, EC:6.4.1.2 )                   | acetyl-CoA carboxylase, biotin carboxylase( EC:6.4.1.1 ) | acetyl-CoA carboxylase, biotin carboxylase( EC:6.4.1.1 ) | AccC, Pyc       | ACCOAC, PC            |
| 26                | cbdbA143                   | DET0123                  | DehaBAV1_0247             | VS131                   | pyridine nucleotide-disulphide oxidoreductase family protein    | pyridine nucleotide-disulphide oxidoreductase family protein       | 4Fe-4S ferredoxin, iron sulfur binding domain protein    | 4Fe-4S ferredoxin, iron-sulfur binding domain protein    | GitB            | GLUSy                 |
| 27                | cbdbA145                   | DET0125                  | DehaBAV1_0246             | VS132                   | alcohol dehydrogenase, zinc-containing                          | alcohol dehydrogenase, zinc-containing                             | Alcohol dehydrogenase GroES domain protein               | Alcohol dehydrogenase GroES domain protein               | AdhC            | ALCD19, ALCD2x, ALCD3 |
| 28                | cbdbA146                   | DET0126                  | DehaBAV1_0245             | VS133                   | anthranilate phosphoribosyltransferase                          | anthranilate phosphoribosyltransferase( EC:2.4.2.18 )              | anthranilate phosphoribosyltransferase                   | anthranilate phosphoribosyltransferase( EC:2.4.2.18 )    | TrpD            | ANPRT                 |
| 29                | cbdbA149                   | DET0128                  | DehaBAV1_0243             | VS135                   | cobyrinic acid a,c-diamide synthase                             | cobyrinic acid a,c-diamide synthase                                | cobyrinic acid a,c-diamide synthase                      | cobyrinic acid a,c-diamide synthase                      | CobB            | CYRDAS                |
| 30                | cbdbA160                   | DET0137                  | DehaBAV1_0233             | VS145                   | methylglyoxal synthase                                          | methylglyoxal synthase( EC:4.2.3.3 )                               | methylglyoxal synthase( EC:4.2.3.3 )                     | methylglyoxal synthase( EC:4.2.3.3 )                     | MgsA            | MGSA                  |

| Model gene number | CBDB1 core metabolic genes | 195 core metabolic genes | BAV1 core metabolic genes | VS core metabolic genes | CBDB1 annotation                                     | 195 annotation                                                | BAV1 annotation                                          | VS annotation                                            | Model protein       | Model reaction                            |
|-------------------|----------------------------|--------------------------|---------------------------|-------------------------|------------------------------------------------------|---------------------------------------------------------------|----------------------------------------------------------|----------------------------------------------------------|---------------------|-------------------------------------------|
| 31                | cbdbA161                   | DET0138                  | DehaBAV1_0232             | VS146                   | phosphate ABC transporter, phosphate-binding protein | phosphate ABC transporter, phosphate-binding protein          | phosphate binding protein                                | phosphate binding protein                                | PstABCS             | Plabc                                     |
| 32                | cbdbA162                   | DET0139                  | DehaBAV1_0231             | VS147                   | phosphate ABC transporter, permease protein          | phosphate ABC transporter, permease protein                   | phosphate ABC transporter, inner membrane subunit PstC   | phosphate ABC transporter, inner membrane subunit PstC   | PstABCS             | Plabc                                     |
| 33                | cbdbA164                   | DET0140                  | DehaBAV1_0230             | VS148                   | phosphate ABC transporter, permease protein          | phosphate ABC transporter, permease protein                   | phosphate ABC transporter, inner membrane subunit PstA   | phosphate ABC transporter, inner membrane subunit PstA   | PstABCS             | Plabc                                     |
| 34                | cbdbA165                   | DET0141                  | DehaBAV1_0229             | VS149                   | phosphate ABC transporter, ATP-binding protein       | phosphate ABC transporter, ATP-binding protein( EC:3.6.3.27 ) | phosphate ABC transporter, ATPase subunit( EC:3.6.3.27 ) | phosphate ABC transporter, ATPase subunit( EC:3.6.3.27 ) | PstABCS             | Plabc                                     |
| 35                | cbdbA169                   | DET0145                  | DehaBAV1_0226             | VS153                   | putative [Fe] hydrogenase, HymA subunit              | [Fe] hydrogenase, HymA subunit, putative                      | NADH dehydrogenase (ubiquinone), 24 kDa subunit          | NADH dehydrogenase (ubiquinone), 24 kDa subunit          | Nadhd5              | NADH6, NADH7, NADH4, NADH8                |
| 36                | cbdbA170                   | DET0146                  | DehaBAV1_0225             | VS154                   | putative [Fe] hydrogenase, HymB subunit              | [Fe] hydrogenase, HymB subunit, putative( EC:1.6.99.5 )       | NADH dehydrogenase (quinone)( EC:1.6.99.5 )              | NADH dehydrogenase (quinone)( EC:1.6.99.5 )              | Nadhd5              | NADH6, NADH7, NADH4, NADH8                |
| 37                | cbdbA171                   | DET0147                  | DehaBAV1_0224             | VS155                   | putative [Fe] hydrogenase, large subunit HymC        | [Fe] hydrogenase, large subunit HymC, putative                | hydrogenase, Fe-only                                     | hydrogenase, Fe-only                                     | Nadphd, Nadhd5, Fdx | NADH6, NADPH12, NADH7, NADH4, FRHD, NADH8 |
| 38                | cbdbA173                   | DET0148                  | DehaBAV1_0223             | VS156                   | putative [Fe] hydrogenase, HymD subunit              | [Fe] hydrogenase, HymD subunit, putative                      | hypothetical protein                                     | putative (Fe) hydrogenase, HymD subunit                  | Nadhd5              | NADH6, NADH7, NADH4, NADH8                |
| 39                | cbdbA182                   | DET0153                  | DehaBAV1_0217             | VS162                   | hypothetical protein                                 | hypothetical protein                                          | hypothetical protein                                     | alkylhydroperoxidase like protein, AhpD family           | PcaC2               | CMLDC                                     |

| Model gene number | CBDB1 core metabolic genes | 195 core metabolic genes | BAV1 core metabolic genes | VS core metabolic genes | CBDB1 annotation                                             | 195 annotation                                                           | BAV1 annotation                                          | VS annotation                                                | Model protein | Model reaction |
|-------------------|----------------------------|--------------------------|---------------------------|-------------------------|--------------------------------------------------------------|--------------------------------------------------------------------------|----------------------------------------------------------|--------------------------------------------------------------|---------------|----------------|
| 40                | cbdbA187                   | DET0180                  | DehaBAV1_0173             | VS169                   | putative reductive dehalogenase                              | reductive dehalogenase, putative                                         | reductive dehalogenase                                   | reductive dehalogenase                                       | RdhA          | RDR1, RDR2     |
| 41                | cbdbA188                   | DET0181                  | DehaBAV1_0172             | VS170                   | putative reductive dehalogenase anchoring protein            | reductive dehalogenase anchoring protein, putative                       | hypothetical protein                                     | reductive dehalogenase anchoring protein, putative           | RdhB          | RDR1, RDR2     |
| 42                | cbdbA196                   | DET0189                  | DehaBAV1_0164             | VS177                   | putative methyltransferase                                   | methyltransferase, putative                                              | putative methyltransferase                               | putative methyltransferase                                   | AsnA          | ASNS2          |
| 43                | cbdbA197                   | DET0190                  | DehaBAV1_0163             | VS178                   | pantetheine-phosphate adenyltransferase                      | pantetheine-phosphate adenyltransferase( EC:2.7.7.3 )                    | pantetheine-phosphate adenyltransferase( EC:2.7.7.3 )    | pantetheine-phosphate adenyltransferase ( EC:2.7.7.3 )       | CoaD          | PTPAT          |
| 44                | cbdbA198                   | DET0191                  | DehaBAV1_0162             | VS179                   | ferredoxin, iron-sulfur cluster-binding protein              | iron-sulfur cluster-binding protein                                      | 4Fe-4S ferredoxin, iron sulfur binding domain protein    | 4Fe-4S ferredoxin, iron-sulfur binding domain protein        | Fdx           | FRHD           |
| 45                | cbdbA200                   | DET0193                  | DehaBAV1_0160             | VS181                   | pyrroline-5-carboxylate reductase                            | pyrroline-5-carboxylate reductase( EC:1.5.1.2 )                          | pyrroline-5-carboxylate reductase( EC:1.5.1.2 )          | pyrroline-5-carboxylate reductase( EC:1.5.1.2 )              | ProC          | P5CR           |
| 46                | cbdbA202                   | DET0194                  | DehaBAV1_0159             | VS182                   | leucyl-tRNA synthetase                                       | leucyl-tRNA synthetase( EC:6.1.1.4 )                                     | leucyl-tRNA synthetase                                   | leucyl-tRNA synthetase                                       | LeuS          | LEUTRS         |
| 47                | cbdbA208                   | DET0199                  | DehaBAV1_0154             | VS187                   | putative ferredoxin-thioredoxin reductase, catalytic subunit | ferredoxin-thioredoxin reductase, catalytic subunit, putative/rubredoxin | Rubredoxin-type Fe(Cys) <sub>4</sub> protein             | putative ferredoxin-thioredoxin reductase, catalytic subunit | Fdx           | FRHD           |
| 48                | cbdbA219                   | DET0221                  | DehaBAV1_0133             | VS197                   | L-lysine 2,3-aminomutase homologue, probable frameshift      | L-lysine 2,3-aminomutase, putative/acetyltransferase, GNAT family        | lysine 2,3-aminomutase YodO family protein( EC:5.4.3.2 ) | lysine 2,3-aminomutase YodO family protein                   | KamA          | LYSAM          |
| 49                | cbdbA238                   | DET0302                  | DehaBAV1_0121             | VS1353                  | putative reductive dehalogenase                              | reductive dehalogenase, putative                                         | reductive dehalogenase                                   | reductive dehalogenase                                       | RdhA          | RDR1, RDR2     |

| Model gene number | CBDB1 core metabolic genes | 195 core metabolic genes | BAV1 core metabolic genes | VS core metabolic genes | CBDB1 annotation                                       | 195 annotation                                                         | BAV1 annotation                                                                  | VS annotation                                                          | Model protein | Model reaction                                         |
|-------------------|----------------------------|--------------------------|---------------------------|-------------------------|--------------------------------------------------------|------------------------------------------------------------------------|----------------------------------------------------------------------------------|------------------------------------------------------------------------|---------------|--------------------------------------------------------|
| 50                | cbdbA239                   | DET0303                  | DehaBAV1_0120             | VS1352                  | putative reductive dehalogenase anchoring protein      | reductive dehalogenase anchoring protein, putative                     | hypothetical protein                                                             | putative reductive dehalogenase anchoring protein                      | RdhB          | RDR1, RDR2                                             |
| 51                | cbdbA243                   | DET0235                  | DehaBAV1_0119             | VS1347                  | putative reductive dehalogenase                        | reductive dehalogenase, putative                                       | reductive dehalogenase                                                           | reductive dehalogenase                                                 | RdhA          | RDR1, RDR2                                             |
| 52                | cbdbA287                   | DET0345                  | DehaBAV1_0324             | VS286                   | ribonucleotide reductase                               | ribonucleotide-diphosphate reductase alpha subunit( EC:1.17.4.1 )      | ribonucleoside-diphosphate reductase, adenosylcobalamin-dependent( EC:1.17.4.1 ) | ribonucleoside-diphosphate reductase, adenosylcobalamin-dependent      | NrdD, NrdEF   | RNDR3, RNDR1, RNDR4, RNDR2, RNTR2, RNTR3, RNTR1, RNTR4 |
| 53                | cbdbA307                   | DET0365                  | DehaBAV1_0347             | VS309                   | phenylalanyl-tRNA synthetase, alpha subunit            | phenylalanyl-tRNA synthetase, alpha subunit( EC:6.1.1.20 )             | phenylalanyl-tRNA synthetase, alpha subunit                                      | phenylalanyl-tRNA synthetase, alpha subunit( EC:6.1.1.20 )             | PheRS         | PHETRS                                                 |
| 54                | cbdbA308                   | DET0366                  | DehaBAV1_0348             | VS310                   | phenylalanyl-tRNA synthetase, beta subunit             | phenylalanyl-tRNA synthetase, beta subunit( EC:6.1.1.20 )              | phenylalanyl-tRNA synthetase, beta subunit( EC:6.1.1.20 )                        | phenylalanyl-tRNA synthetase, beta subunit( EC:6.1.1.20 )              | PheRS         | PHETRS                                                 |
| 55                | cbdbA309                   | DET0367                  | DehaBAV1_0349             | VS311                   | inorganic pyrophosphatase                              | inorganic pyrophosphatase( EC:3.6.1.1 )                                | Inorganic diphosphatase( EC:3.6.1.1 )                                            | Inorganic diphosphatase( EC:3.6.1.1 )                                  | Ppa           | PPA                                                    |
| 56                | cbdbA310                   | DET0368                  | DehaBAV1_0350             | VS312                   | prolyl-tRNA synthetase                                 | prolyl-tRNA synthetase( EC:6.1.1.15 )                                  | prolyl-tRNA synthetase                                                           | prolyl-tRNA synthetase                                                 | ProS          | PROTRS                                                 |
| 57                | cbdbA311                   | DET0369                  | DehaBAV1_0351             | VS313                   | 1-hydroxy-2-methyl-2-(E)-butenyl 4-diphosphatesynthase | 1-hydroxy-2-methyl-2-(E)-butenyl 4-diphosphate synthase( EC:1.17.4.3 ) | 1-hydroxy-2-methyl-2-(E)-butenyl 4-diphosphate synthase( EC:1.17.4.3 )           | 1-hydroxy-2-methyl-2-(E)-butenyl 4-diphosphate synthase( EC:1.17.4.3 ) | IspG          | MECDPDH                                                |

| Model gene number | CBDB1 core metabolic genes | 195 core metabolic genes | BAV1 core metabolic genes | VS core metabolic genes | CBDB1 annotation                                | 195 annotation                                                  | BAV1 annotation                                                 | VS annotation                                                   | Model protein | Model reaction                                    |
|-------------------|----------------------------|--------------------------|---------------------------|-------------------------|-------------------------------------------------|-----------------------------------------------------------------|-----------------------------------------------------------------|-----------------------------------------------------------------|---------------|---------------------------------------------------|
| 58                | cbdbA314                   | DET0371                  | DehaBAV1_0353             | VS315                   | 1-deoxy-D-xylulose 5-phosphate reductoisomerase | 1-deoxy-D-xylulose 5-phosphate reductoisomerase( EC:1.1.1.267 ) | 1-deoxy-D-xylulose 5-phosphate reductoisomerase( EC:1.1.1.267 ) | 1-deoxy-D-xylulose 5-phosphate reductoisomerase( EC:1.1.1.267 ) | Dxr           | DXPRI                                             |
| 59                | cbdbA315                   | DET0372                  | DehaBAV1_0354             | VS316                   | phosphatidate cytidyltransferase                | phosphatidate cytidyltransferase( EC:2.7.7.41 )                 | phosphatidate cytidyltransferase                                | phosphatidate cytidyltransferase                                | CdsA          | PHCYT                                             |
| 60                | cbdbA316                   | DET0373                  | DehaBAV1_0355             | VS317                   | undecaprenyl diphosphate synthase               | undecaprenyl diphosphate synthase( EC:2.5.1.31 )                | undecaprenyl diphosphate synthase( EC:2.5.1.31 )                | undecaprenyl diphosphate synthase( EC:2.5.1.31 )                | UppS          | UDPDP5                                            |
| 61                | cbdbA319                   | DET0375                  | DehaBAV1_0357             | VS319                   | uridylate kinase                                | uridylate kinase( EC:2.7.4.- )                                  | uridylate kinase                                                | uridylate kinase                                                | PyrH          | URIDK2, URIDK1                                    |
| 62                | cbdbA323                   | DET0378                  | DehaBAV1_0360             | VS322                   | phosphoribosylformylglycinamide synthase I      | phosphoribosylformylglycinamide synthase I( EC:6.3.5.3 )        | phosphoribosylformylglycinamide synthase I( EC:6.3.5.3 )        | phosphoribosylformylglycinamide synthase I                      | PurQ          | PRFGS                                             |
| 63                | cbdbA325                   | DET0379                  | DehaBAV1_0361             | VS323                   | phosphoribosylformylglycinamide synthase II     | phosphoribosylformylglycinamide synthase II( EC:6.3.5.3 )       | phosphoribosylformylglycinamide synthase II( EC:6.3.5.3 )       | phosphoribosylformylglycinamide synthase II( EC:6.3.5.3 )       | PurL          | PRFGS                                             |
| 64                | cbdbA327                   | DET0380                  | DehaBAV1_0362             | VS324                   | pyridoxine biosynthesis protein                 | pyridoxine biosynthesis protein                                 | pyridoxine biosynthesis protein                                 | pyridoxine biosynthesis protein                                 | PdxAJ         | PDX5PS                                            |
| 65                | cbdbA329                   | DET0384                  | DehaBAV1_0365             | VS328                   | IMP dehydrogenase family protein                | inositol-5-monophosphate dehydrogenase                          | IMP dehydrogenase family protein                                | IMP dehydrogenase family protein                                | GuaB, GuaC    | GMPR, IMPD                                        |
| 66                | cbdbA334                   | DET0388                  | DehaBAV1_0368             | VS331                   | methionyl-tRNA synthetase                       | methionyl-tRNA synthetase( EC:6.1.1.10 )                        | methionyl-tRNA synthetase                                       | methionyl-tRNA synthetase                                       | MetG          | METTRS                                            |
| 67                | cbdbA335                   | DET0389                  | DehaBAV1_0369             | VS332                   | heptaprenyl diphosphate synthase component II   | heptaprenyl diphosphate synthase component II( EC:2.5.1.30 )    | Polyprenyl synthetase                                           | Trans-hexaprenyltransferase( EC:2.5.1.30 )                      | IspA, HepT    | PPTT, FRTT, GGTT, DMATT, HEPTT, OCTT, HEXTT, GRTT |

| Model gene number | CBDB1 core metabolic genes | 195 core metabolic genes | BAV1 core metabolic genes | VS core metabolic genes | CBDB1 annotation                                                    | 195 annotation                                                       | BAV1 annotation                                  | VS annotation                                    | Model protein | Model reaction                                         |
|-------------------|----------------------------|--------------------------|---------------------------|-------------------------|---------------------------------------------------------------------|----------------------------------------------------------------------|--------------------------------------------------|--------------------------------------------------|---------------|--------------------------------------------------------|
| 68                | cbdbA343                   | DET0394                  | DehaBAV1_0373             | VS336                   | nucleoside diphosphate kinase                                       | nucleoside diphosphate kinase( EC:2.7.4.6 )                          | Nucleoside-diphosphate kinase( EC:2.7.4.6 )      | Nucleoside-diphosphate kinase( EC:2.7.4.6 )      | Ndk           | NDPK7, NDPK3, NDPK5, NDPK2, NDPK8, NDPK6, NDPK4, NDPK1 |
| 69                | cbdbA347                   | DET0397                  | DehaBAV1_0376             | VS340                   | thiamine-monophosphate kinase                                       | thiamine-monophosphate kinase( EC:2.7.4.16 )                         | thiamine-monophosphate kinase                    | thiamine-monophosphate kinase( EC:2.7.4.16 )     | ThiL          | TMPKr                                                  |
| 70                | cbdbA349                   | DET0398                  | DehaBAV1_0377             | VS341                   | putative ubiquinone/menaquinone biosynthesis methyltransferase UbiE | ubiquinone/menaquinone biosynthesis methyltransferase UbiE, putative | UbiE/COQ5 methyltransferase                      | UbiE/COQ5 methyltransferase                      | UbiE          | OMBZLM                                                 |
| 71                | cbdbA350                   | DET0399                  | DehaBAV1_0378             | VS342                   | putative ubiquinone/menaquinone biosynthesis methyltransferase UbiE | ubiquinone/menaquinone biosynthesis methyltransferase UbiE, putative | Methyltransferase type 11                        | Methyltransferase type 12                        | UbiE          | OMBZLM                                                 |
| 72                | cbdbA351                   | DET0400                  | DehaBAV1_0379             | VS343                   | 3-dehydroquininate synthase                                         | 3-dehydroquininate synthase family protein( EC:4.2.3.- )             | 3-dehydroquininate synthase                      | 3-dehydroquininate synthase                      | AroB          | DHQS                                                   |
| 73                | cbdbA352                   | DET0401                  | DehaBAV1_0380             | VS344                   | putative 1,4-dihydroxy-2-naphthoate octaprenyltransferase           | 1,4-dihydroxy-2-naphthoate octaprenyltransferase, putative           | UbiA prenyltransferase                           | UbiA prenyltransferase                           | MenA          | DHNAOT                                                 |
| 74                | cbdbA356                   | DET0405                  | DehaBAV1_0384             | VS348                   | 4-diphosphocytidyl-2C-methyl-D-erythritol kinase                    | 4-diphosphocytidyl-2C-methyl-D-erythritol kinase( EC:2.7.1.148 )     | 4-diphosphocytidyl-2C-methyl-D-erythritol kinase | 4-diphosphocytidyl-2C-methyl-D-erythritol kinase | IspE, ThrB    | CDPMEK, HSK                                            |
| 75                | cbdbA359                   | DET0407                  | DehaBAV1_0386             | VS350                   | conserved domain protein                                            | hypothetical protein                                                 | hypothetical protein                             | conserved hypothetical protein                   | ManC          | MAN1PT2                                                |



| Model gene number | CBDB1 core metabolic genes | 195 core metabolic genes | BAV1 core metabolic genes | VS core metabolic genes | CBDB1 annotation                                                  | 195 annotation                                                                  | BAV1 annotation                                                                                           | VS annotation                                                                   | Model protein | Model reaction       |
|-------------------|----------------------------|--------------------------|---------------------------|-------------------------|-------------------------------------------------------------------|---------------------------------------------------------------------------------|-----------------------------------------------------------------------------------------------------------|---------------------------------------------------------------------------------|---------------|----------------------|
| 76                | cbdbA365                   | DET0413                  | DehaBAV1_0392             | VS356                   | putative deoxycytidylate deaminase                                | cytidine/deoxycytidylate deaminase family protein                               | CMP/dCMP deaminase, zinc-binding                                                                          | CMP/dCMP deaminase, zinc-binding                                                | ComEB         | DCMPDA3ir, DCMPDA2ir |
| 77                | cbdbA367                   | DET0414                  | DehaBAV1_0393             | VS357                   | conserved hypothetical protein                                    | conserved hypothetical protein TIGR00147                                        | diacylglycerol kinase, catalytic region                                                                   | diacylglycerol kinase, catalytic region                                         | DgkA          | DAGK                 |
| 78                | cbdbA368                   | DET0415                  | DehaBAV1_0394             | VS358                   | deoxyuridine 5'-triphosphatenucleotidohydrolase                   | putative deoxyuridine 5'-triphosphate nucleotidohydrolase( EC:3.6.1.23 )        | Deoxycytidine deaminase-like protein                                                                      | putative deoxyuridine 5'-triphosphate nucleotidohydrolase                       | Dutec         | DUTPDP               |
| 79                | cbdbA369                   | DET0417                  | DehaBAV1_0396             | VS360                   | amino acid ABC transporter, ATP-binding protein                   | amino acid ABC transporter, ATP-binding protein                                 | ABC transporter related                                                                                   | ABC transporter related                                                         | GlnQ          | GLNabc               |
| 80                | cbdbA370                   | DET0418                  | DehaBAV1_0397             | VS361                   | amino acid ABC transporter, permease protein                      | amino acid ABC transporter, permease protein, His/Glu/Gln/Arg/opine family      | polar amino acid ABC transporter, inner membrane subunit                                                  | polar amino acid ABC transporter, inner membrane subunit                        | GlnP          | GLNabc               |
| 81                | cbdbA371                   | DET0419                  | DehaBAV1_0398             | VS362                   | amino acid ABC transporter, periplasmic aminoacid binding protein | amino acid ABC transporter, periplasmic amino acid-binding protein              | extracellular solute-binding protein, family 3                                                            | extracellular solute-binding protein, family 3                                  | GlnH          | GLNabc               |
| 82                | cbdbA374                   | DET0424                  | DehaBAV1_0400             | VS365                   | putative magnesium and cobalt transport protein                   | magnesium and cobalt transport protein, putative                                | Mg2+ transporter protein, CorA family protein                                                             | Mg2+ transporter protein, CorA family protein                                   | CorA1         | MGt5, COBALt5        |
| 83                | cbdbA381                   | DET0428                  | DehaBAV1_0405             | VS370                   | transcriptional regulator                                         | transcriptional activator, putative                                             | putative transcriptional activator, Baf family                                                            | putative transcriptional activator, Baf family                                  | CoaA          | PNTK                 |
| 84                | cbdbA383                   | DET0429                  | DehaBAV1_0406             | VS371                   | phosphopantothenoyl cysteine synthetase/decarboxylase             | phosphopantothenoyl cysteine decarboxylase/phosphopantothenate--cysteine ligase | phosphopantothenoyl cysteine decarboxylase/phosphopantothenate--cysteine ligase( EC:4.1.1.36,EC:6.3.2.5 ) | phosphopantothenoyl cysteine decarboxylase/phosphopantothenate--cysteine ligase | Dfp           | PPCDC, PPNCL         |

| Model gene number | CBDB1 core metabolic genes | 195 core metabolic genes | BAV1 core metabolic genes | VS core metabolic genes | CBDB1 annotation                              | 195 annotation                                              | BAV1 annotation                                       | VS annotation                                         | Model protein | Model reaction                              |
|-------------------|----------------------------|--------------------------|---------------------------|-------------------------|-----------------------------------------------|-------------------------------------------------------------|-------------------------------------------------------|-------------------------------------------------------|---------------|---------------------------------------------|
| 85                | cbdbA384                   | DET0430                  | DehaBAV1_0407             | VS372                   | valyl-tRNA synthetase                         | valyl-tRNA synthetase( EC:6.1.1.9 )                         | valyl-tRNA synthetase( EC:6.1.1.9 )                   | valyl-tRNA synthetase( EC:6.1.1.9 )                   | ValS          | VALTRS                                      |
| 86                | cbdbA389                   | DET0435                  | DehaBAV1_0412             | VS377                   | ribose-phosphate pyrophosphokinase            | ribose-phosphate pyrophosphokinase( EC:2.7.6.1 )            | ribose-phosphate pyrophosphokinase( EC:2.7.6.1 )      | ribose-phosphate pyrophosphokinase ( EC:2.7.6.1 )     | Prs           | PRPPS                                       |
| 87                | cbdbA390                   | DET0436                  | DehaBAV1_0413             | VS378                   | serine hydroxymethyltransferase               | Serine hydroxymethyltransferase( EC:2.1.2.1 )               | Glycine hydroxymethyltransferase( EC:2.1.2.1 )        | Glycine hydroxymethyltransferase( EC:2.1.2.1 )        | GlyA          | GHMT, ALATA_L2, ALATA_D2                    |
| 88                | cbdbA392                   | DET0438                  | DehaBAV1_0415             | VS380                   | metallo-beta-lactamase family protein         | metallo-beta-lactamase family protein                       | beta-lactamase domain protein                         | beta-lactamase domain protein                         | GloB          | GLYOX                                       |
| 89                | cbdbA400                   | DET0444                  | DehaBAV1_0421             | VS386                   | conserved hypothetical protein                | conserved hypothetical protein TIGR01033                    | protein of unknown function DUF28                     | protein of unknown function DUF28                     | GlgC          | GLGC                                        |
| 90                | cbdbA401                   | DET0445                  | DehaBAV1_0422             | VS387                   | holo-(acyl-carrier-protein) synthase          | holo-(acyl-carrier-protein) synthase( EC:2.7.8.7 )          | holo-acyl-carrier-protein synthase( EC:2.7.8.7 )      | holo-acyl-carrier-protein synthase                    | AcpS          | ACPS1                                       |
| 91                | cbdbA403                   | DET0446                  | DehaBAV1_0423             | VS388                   | putative [Fe] hydrogenase, HymA subunit       | [Fe] hydrogenase, HymA subunit, putative                    | NADH dehydrogenase (ubiquinone), 24 kDa subunit       | NADH dehydrogenase (ubiquinone), 24 kDa subunit       | Nadhd5        | NADH6, NADH7, NADH4, NADH8                  |
| 92                | cbdbA404                   | DET0447                  | DehaBAV1_0424             | VS389                   | acyl CoA biotin-dependant carboxyltransferase | acyl CoA biotin-dependant carboxyltransferase( EC:6.4.1.3 ) | carboxyl transferase( EC:6.4.1.3 )                    | carboxyl transferase( EC:6.4.1.3 )                    | YngE          | PPCOAC                                      |
| 93                | cbdbA405                   | DET0448                  | DehaBAV1_0425             | VS390                   | homoaconitate hydratase family protein        | 3-isopropylmalate dehydratase                               | homoaconitate hydratase family protein( EC:4.2.1.33 ) | homoaconitate hydratase family protein( EC:4.2.1.33 ) | LeuCD, Aco3   | MICITH, ACONT, IPPMIb, IPPMIa, IPMI1, IPMI2 |
| 94                | cbdbA407                   | DET0449                  | DehaBAV1_0426             | VS391                   | aconitase C-terminal domain protein           | isopropylmalate isomerase small subunit                     | 3-isopropylmalate dehydratase, small subunit          | 3-isopropylmalate dehydratase, small subunit          | LeuCD, Aco3   | MICITH, ACONT, IPPMIb, IPPMIa, IPMI1, IPMI2 |

| Model gene number | CBDB1 core metabolic genes | 195 core metabolic genes | BAV1 core metabolic genes | VS core metabolic genes | CBDB1 annotation                                     | 195 annotation                                          | BAV1 annotation                                                                  | VS annotation                                                      | Model protein | Model reaction |
|-------------------|----------------------------|--------------------------|---------------------------|-------------------------|------------------------------------------------------|---------------------------------------------------------|----------------------------------------------------------------------------------|--------------------------------------------------------------------|---------------|----------------|
| 95                | cbdbA408                   | DET0450                  | DehaBAV1_0427             | VS392                   | putative isocitrate dehydrogenase                    | isocitrate dehydrogenase, putative( EC:1.1.1.41 )       | Isocitrate dehydrogenase (NAD+)( EC:1.1.1.41 )                                   | Isocitrate dehydrogenase (NAD+)( EC:1.1.1.41 )                     | Icd           | ICDHy          |
| 96                | cbdbA409                   | DET0451                  | DehaBAV1_0428             | VS393                   | malate dehydrogenase, NAD-dependent                  | malate dehydrogenase, NAD-dependent( EC:1.1.1.37 )      | malate dehydrogenase, NAD-dependent                                              | malate dehydrogenase, NAD-dependent                                | Ldh, Mdh      | MDH, LDH_L     |
| 97                | cbdbA411                   | DET0453                  | DehaBAV1_0430             | VS395                   | putative fumarate hydratase, alpha subunit           | fumarate hydratase                                      | hydro-lyase, Fe-S type, tartrate/fumarate subfamily, alpha subunit( EC:4.2.1.2 ) | hydro-lyase, Fe-S type, tartrate/fumarate subfamily, alpha subunit | TtdA          | FUM            |
| 98                | cbdbA413                   | DET0454                  | DehaBAV1_0431             | VS396                   | putative fumarate hydratase, beta subunit            | fumarate hydratase, beta subunit, putative              | hydro-lyase, Fe-S type, tartrate/fumarate subfamily, beta subunit                | hydro-lyase, Fe-S type, tartrate/fumarate subfamily, beta subunit  | FumB          | FUM            |
| 99                | cbdbA416                   | DET0456                  | DehaBAV1_0433             | VS398                   | MutT                                                 | MutT/nudix family protein                               | NUDIX hydrolase                                                                  | NUDIX hydrolase                                                    | NudF          | ADPRDP         |
| 100               | cbdbA417                   | DET0457                  | DehaBAV1_0434             | VS399                   | acetyltransferase, GNAT family                       | acetyltransferase, GNAT family                          | GCN5-related N-acetyltransferase                                                 | GCN5-related N-acetyltransferase                                   | ArgA          | ACGS           |
| 101               | cbdbA419                   | DET0458                  | DehaBAV1_0435             | VS400                   | inorganic polyphosphate                              | inorganic polyphosphate/ATP-NAD kinase, putative        | ATP-NAD/AcoX kinase                                                              | NAD(+) kinase( EC:2.7.1.23 )                                       | NadK          | NADK           |
| 102               | cbdbA423                   | DET0460                  | DehaBAV1_0437             | VS403                   | prephenate dehydrogenase                             | prephenate dehydrogenase( EC:1.3.1.12 )                 | Prephenate dehydrogenase                                                         | Prephenate dehydrogenase                                           | YlbQ, TyrA    | DPR, PPND      |
| 103               | cbdbA424                   | DET0461                  | DehaBAV1_0438             | VS404                   | chorismate mutase/prephenate dehydratase (P-protein) | chorismate mutase/prephenate dehydratase( EC:5.4.99.5 ) | prephenate dehydratase                                                           | prephenate dehydratase                                             | PheA          | PPNDH, CHORM   |
| 104               | cbdbA425                   | DET0462                  | DehaBAV1_0439             | VS405                   | chorismate synthase                                  | chorismate synthase( EC:4.2.3.5,EC:4.6.1.4 )            | Chorismate synthase( EC:4.2.3.5 )                                                | Chorismate synthase( EC:4.2.3.5 )                                  | AroC1         | CHORS          |

| Model gene number | CBDB1 core metabolic genes | 195 core metabolic genes | BAV1 core metabolic genes | VS core metabolic genes | CBDB1 annotation                             | 195 annotation                                                   | BAV1 annotation                                                     | VS annotation                                              | Model protein | Model reaction                      |
|-------------------|----------------------------|--------------------------|---------------------------|-------------------------|----------------------------------------------|------------------------------------------------------------------|---------------------------------------------------------------------|------------------------------------------------------------|---------------|-------------------------------------|
| 105               | cbdbA427                   | DET0463                  | DehaBAV1_0440             | VS406                   | 3-phosphoshikimate 1-carboxyvinyltransferase | 3-phosphoshikimate 1-carboxyvinyltransferase ( EC:2.5.1.19 )     | 3-phosphoshikimate 1-carboxyvinyltransferase                        | 3-phosphoshikimate 1-carboxyvinyltransferase               | Cmk, AroA     | PSCVT, CYTK2, UMPK, CYTK1           |
| 106               | cbdbA428                   | DET0464                  | DehaBAV1_0441             | VS407                   | shikimate kinase                             | shikimate kinase( EC:2.7.1.71 )                                  | Shikimate kinase( EC:2.7.1.71 )                                     | Shikimate kinase( EC:2.7.1.71 )                            | AroK          | SHKK                                |
| 107               | cbdbA429                   | DET0465                  | DehaBAV1_0442             | VS408                   | shikimate 5-dehydrogenase                    | shikimate 5-dehydrogenase( EC:1.1.1.25 )                         | shikimate 5-dehydrogenase                                           | shikimate 5-dehydrogenase( EC:1.1.1.25 )                   | AroE1         | SHK3D                               |
| 108               | cbdbA430                   | DET0466                  | DehaBAV1_0443             | VS409                   | 3-dehydroquinate dehydratase, type I         | 3-dehydroquinate dehydratase, type I( EC:4.2.1.10 )              | 3-dehydroquinate dehydratase, type I( EC:4.2.1.10 )                 | 3-dehydroquinate dehydratase, type I( EC:4.2.1.10 )        | AroD1         | DHGD                                |
| 109               | cbdbA431                   | DET0467                  | DehaBAV1_0444             | VS410                   | 3-dehydroquinate synthase                    | 3-dehydroquinate synthase( EC:4.2.3.4 )                          | 3-dehydroquinate synthase( EC:4.2.3.4 )                             | 3-dehydroquinate synthase( EC:4.2.3.4 )                    | AroB          | DHQS                                |
| 110               | cbdbA432                   | DET0468                  | DehaBAV1_0445             | VS411                   | phospho-2-dehydro-3-deoxyheptonate aldolase  | 3-deoxy-7-phosphoheptulonate synthase( EC:2.5.1.54,EC:4.1.2.15 ) | phospho-2-dehydro-3-deoxyheptonate aldolase( EC:2.5.1.54 )          | phospho-2-dehydro-3-deoxyheptonate aldolase( EC:2.5.1.54 ) | AroG          | DAHPS                               |
| 111               | cbdbA459                   | DET0495                  | DehaBAV1_0472             | VS437                   | adenylate kinase                             | adenylate kinase( EC:2.7.4.3 )                                   | Nucleoside-triphosphate--adenylate kinase( EC:2.7.4.10,EC:2.7.4.3 ) | adenylate kinase( EC:2.7.4.3 )                             | Adk           | ADK1, ADK4, ADNK1, ADK3, ADK2, DADK |
| 112               | cbdbA468                   | DET0504                  | DehaBAV1_0481             | VS446                   | tRNA pseudouridine synthase A                | tRNA pseudouridine synthase A( EC:4.2.1.70 )                     | tRNA pseudouridine synthase A( EC:5.4.99.12 )                       | tRNA pseudouridine synthase A( EC:4.2.1.70 )               | RluB          | PSUDS                               |
| 113               | cbdbA472                   | DET0509                  | DehaBAV1_0485             | VS450                   | SIS domain protein                           | hypothetical protein                                             | bifunctional phosphoglucose/phosphomannose isomerase( EC:5.3.1.8 )  | bifunctional phosphoglucose/phosphomannose isomerase       | Pgi, ManA     | MAN6PI, PGI                         |

| Model gene number | CBDB1 core metabolic genes | 195 core metabolic genes | BAV1 core metabolic genes | VS core metabolic genes | CBDB1 annotation                                       | 195 annotation                                                         | BAV1 annotation                                                       | VS annotation                                                         | Model protein          | Model reaction                     |
|-------------------|----------------------------|--------------------------|---------------------------|-------------------------|--------------------------------------------------------|------------------------------------------------------------------------|-----------------------------------------------------------------------|-----------------------------------------------------------------------|------------------------|------------------------------------|
| 114               | cbdbA474                   | DET0510                  | DehaBAV1_0486             | VS451                   | phosphoglucomutase                                     | phosphoglucomutase /phosphomannomutase family protein                  | Phosphomannomutase( EC:5.4.2.8 )                                      | Phosphomannomutase( EC:5.4.2.8 )                                      | GlmM, Pmgm1            | PGAMT, PGMT, PMANM                 |
| 115               | cbdbA476                   | DET0512                  | DehaBAV1_0488             | VS453                   | S-adenosylmethionine synthetase                        | S-adenosylmethionine synthetase( EC:2.5.1.6 )                          | Methionine adenosyltransferase( EC:2.5.1.6 )                          | Methionine adenosyltransferase( EC:2.5.1.6 )                          | MetK                   | METAT                              |
| 116               | cbdbA477                   | DET0513                  | DehaBAV1_0489             | VS454                   | adenosylhomocysteinase                                 | S-adenosyl-L-homocysteine hydrolase( EC:3.3.1.1 )                      | adenosylhomocysteinase( EC:3.3.1.1 )                                  | adenosylhomocysteinase( EC:3.3.1.1 )                                  | AhcY                   | AHC                                |
| 117               | cbdbA482                   | DET0517                  | DehaBAV1_0493             | VS458                   | methylthioadenosine phosphorylase                      | methylthioadenosine phosphorylase( EC:2.4.2.28 )                       | methylthioadenosine phosphorylase( EC:2.4.2.28 )                      | methylthioadenosine phosphorylase( EC:2.4.2.28 )                      | MtaP                   | MTAP                               |
| 118               | cbdbA484                   | DET0518                  | DehaBAV1_0494             | VS459                   | translation initiation factor, putative, aIF-2BIfamily | translation initiation factor, putative, aIF-2BI family( EC:5.3.1.23 ) | putative translation initiation factor, aIF-2BI family( EC:5.3.1.23 ) | putative translation initiation factor, aIF-2BI family( EC:5.3.1.23 ) | YkrS                   | MTRI                               |
| 119               | cbdbA490                   | DET0523                  | DehaBAV1_0499             | VS464                   | acetyltransferase, GNAT family                         | acetyltransferase, GNAT family                                         | GCN5-related N-acetyltransferase                                      | GCN5-related N-acetyltransferase                                      | ArgA                   | ACGS                               |
| 120               | cbdbA497                   | DET0528                  | DehaBAV1_0504             | VS469                   | phosphomannomutase                                     | phosphoglucomutase /phosphomannomutase family protein                  | Phosphoglucosaminomutase( EC:5.4.2.10 )                               | phosphoglucomutase/phosphomannomutase alpha/beta/alpha domain I       | GlmM, Pmgm1            | PGAMT, PGMT, PMANM                 |
| 121               | cbdbA499                   | DET0529                  | DehaBAV1_0505             | VS470                   | glucose-1-phosphate thymidyltransferase                | glucose-1-phosphate thymidyltransferase ( EC:2.7.7.24 )                | Nucleotidyl transferase                                               | Nucleotidyl transferase                                               | DapD, GlmU, RfbA, GalF | THDPS, G1PTMT, G1PACT, GALU, UAGDP |
| 122               | cbdbA500                   | DET0530                  | DehaBAV1_0506             | VS471                   | glucose-1-phosphate thymidyltransferase                | glucose-1-phosphate thymidyltransferase ( EC:2.7.7.24 )                | Nucleotidyl transferase                                               | Nucleotidyl transferase                                               | GalF, RfbA, GlmU       | G1PTMT, G1PACT, UAGDP, GALU        |

| Model gene number | CBDB1 core metabolic genes | 195 core metabolic genes | BAV1 core metabolic genes | VS core metabolic genes | CBDB1 annotation                                               | 195 annotation                                                                 | BAV1 annotation                                                                | VS annotation                                                                  | Model protein    | Model reaction      |
|-------------------|----------------------------|--------------------------|---------------------------|-------------------------|----------------------------------------------------------------|--------------------------------------------------------------------------------|--------------------------------------------------------------------------------|--------------------------------------------------------------------------------|------------------|---------------------|
| 123               | cbdbA503                   | DET0531                  | DehaBAV1_0507             | VS472                   | glucosamine-fructose-6-phosphate aminotransferase, isomerizing | glucosamine--fructose-6-phosphate aminotransferase, isomerizing( EC:2.6.1.16 ) | glucosamine--fructose-6-phosphate aminotransferase, isomerizing( EC:2.6.1.16 ) | glucosamine--fructose-6-phosphate aminotransferase, isomerizing( EC:2.6.1.16 ) | GlmS             | GF6PTA              |
| 124               | cbdbA508                   | DET0534                  | DehaBAV1_0510             | VS475                   | diaminopimelate decarboxylase                                  | diaminopimelate decarboxylase( EC:4.1.1.20 )                                   | diaminopimelate decarboxylase( EC:4.1.1.20 )                                   | diaminopimelate decarboxylase( EC:4.1.1.20 )                                   | SpeC, LysA, SpeA | ARGDC, DAPDC, ORNDC |
| 125               | cbdbA514                   | DET0540                  | DehaBAV1_0516             | VS481                   | replicative DNA helicase                                       | replicative DNA helicase( EC:3.6.1.- )                                         | replicative DNA helicase                                                       | replicative DNA helicase                                                       | NtpA             | DNMPPA, DNTPPA      |
| 126               | cbdbA516                   | DET0542                  | DehaBAV1_0518             | VS483                   | thioredoxin reductase                                          | thioredoxin-disulfide reductase( EC:1.8.1.9 )                                  | thioredoxin reductase                                                          | thioredoxin reductase                                                          | TrxB             | TRDR                |
| 127               | cbdbA520                   | DET0545                  | DehaBAV1_0521             | VS486                   | amidohydrolase family protein                                  | amidohydrolase family protein( EC:3.5.1.- )                                    | amidohydrolase                                                                 | amidohydrolase                                                                 | DapE, Phyd       | SDPDS, PNTEH        |
| 128               | cbdbA528                   | DET0553                  | DehaBAV1_0528             | VS493                   | putative deoxyguanosinetriphosphate triphosphohydrolase        | deoxyguanosinetriphosphate triphosphohydrolase-like protein                    | putative deoxyguanosinetriphosphate triphosphohydrolase                        | putative deoxyguanosinetriphosphate triphosphohydrolase                        | Dgt              | NTPTP2, DGTPH       |
| 129               | cbdbA529                   | DET0554                  | DehaBAV1_0529             | VS494                   | phosphoenolpyruvate synthase                                   | phosphoenolpyruvate synthase( EC:2.7.9.2 )                                     | phosphoenolpyruvate synthase( EC:2.7.9.2 )                                     | phosphoenolpyruvate synthase( EC:2.7.9.2 )                                     | PpdK, Ppsa, Pyk  | PPS, PYK, PPK       |
| 130               | cbdbA532                   | DET0558                  | DehaBAV1_0532             | VS497                   | ATP synthase F0, A subunit                                     | ATP synthase F0, A subunit( EC:3.6.3.14 )                                      | ATP synthase F0, A subunit                                                     | ATP synthase F0, A subunit                                                     | AtpABCDEF GHI    | ATPS3r              |
| 131               | cbdbA533                   | DET0559                  | DehaBAV1_0533             | VS498                   | ATP synthase F0, C subunit                                     | ATP synthase F0, C subunit( EC:3.6.3.14 )                                      | ATP synthase F0, C subunit                                                     | ATP synthase F0, C subunit                                                     | AtpABCDEF GHI    | ATPS3r              |
| 132               | cbdbA534                   | DET0560                  | DehaBAV1_0534             | VS499                   | ATP synthase F0, B subunit                                     | ATP synthase F0, B subunit( EC:3.6.3.14 )                                      | ATP synthase F0, B subunit                                                     | ATP synthase F0, B subunit                                                     | AtpABCDEF GHI    | ATPS3r              |

| Model gene number | CBDB1 core metabolic genes | 195 core metabolic genes | BAV1 core metabolic genes | VS core metabolic genes | CBDB1 annotation                                                               | 195 annotation                                                              | BAV1 annotation                                                 | VS annotation                                                   | Model protein | Model reaction |
|-------------------|----------------------------|--------------------------|---------------------------|-------------------------|--------------------------------------------------------------------------------|-----------------------------------------------------------------------------|-----------------------------------------------------------------|-----------------------------------------------------------------|---------------|----------------|
| 133               | cbdbA535                   | DET0561                  | DehaBAV1_0535             | VS500                   | ATP synthase F1, delta subunit                                                 | ATP synthase F1, delta subunit( EC:3.6.3.14 )                               | ATP synthase F1, delta subunit                                  | ATP synthase F1, delta subunit                                  | AtpABCDEF GHI | ATPS3r         |
| 134               | cbdbA536                   | DET0562                  | DehaBAV1_0536             | VS501                   | ATP synthase F1, alpha subunit                                                 | ATP synthase subunit A( EC:3.6.3.14 )                                       | ATP synthase F1, alpha subunit( EC:3.6.3.14 )                   | ATP synthase F1, alpha subunit( EC:3.6.3.15 )                   | AtpABCDEF GHI | ATPS3r         |
| 135               | cbdbA537                   | DET0563                  | DehaBAV1_0537             | VS502                   | ATP synthase F1, gamma subunit                                                 | ATP synthase F1, gamma subunit( EC:3.6.3.14 )                               | ATP synthase F1, gamma subunit( EC:3.6.3.14 )                   | ATP synthase F1, gamma subunit( EC:3.6.3.15 )                   | AtpABCDEF GHI | ATPS3r         |
| 136               | cbdbA538                   | DET0564                  | DehaBAV1_0538             | VS503                   | ATP synthase F1, beta subunit                                                  | ATP synthase subunit B( EC:3.6.3.14 )                                       | ATP synthase F1, beta subunit                                   | ATP synthase F1, beta subunit( EC:3.6.3.15 )                    | AtpABCDEF GHI | ATPS3r         |
| 137               | cbdbA539                   | DET0565                  | DehaBAV1_0539             | VS504                   | ATP synthase F1, epsilon subunit                                               | ATP synthase F1, epsilon subunit( EC:3.6.3.14 )                             | ATP synthase F1, epsilon subunit                                | ATP synthase F1, epsilon subunit                                | AtpABCDEF GHI | ATPS3r         |
| 138               | cbdbA547                   | DET0573                  | DehaBAV1_0547             | VS512                   | ABC-type dipeptide/oligopeptide/nickel transport system, periplasmic component | oligopeptide-binding protein, putative                                      | extracellular solute-binding protein, family 5                  | extracellular solute-binding protein, family 5                  | NikA          | Nlabc          |
| 139               | cbdbA553                   | DET0576                  | DehaBAV1_0549             | VS515                   | aminotransferase, classes I and II                                             | aminotransferase, classes I and II                                          | aminotransferase, class I and II                                | aminotransferase, class I and II                                | AspC          | ASPTA1         |
| 140               | cbdbA554                   | DET0577                  | DehaBAV1_0550             | VS516                   | seryl-tRNA synthetase                                                          | seryl-tRNA synthetase( EC:6.1.1.11 )                                        | seryl-tRNA synthetase( EC:6.1.1.11 )                            | seryl-tRNA synthetase( EC:6.1.1.11 )                            | SerS          | SERTRS         |
| 141               | cbdbA555                   | DET0578                  | DehaBAV1_0551             | VS517                   | lysyl-tRNA synthetase                                                          | lysyl-tRNA synthetase( EC:6.1.1.6 )                                         | lysyl-tRNA synthetase( EC:6.1.1.6 )                             | lysyl-tRNA synthetase( EC:6.1.1.6 )                             | LysS          | LYSTRS         |
| 142               | cbdbA560                   | DET0582                  | DehaBAV1_0556             | VS521                   | magnesium and cobalt transport protein CorA                                    | magnesium and cobalt transport protein CorA                                 | magnesium and cobalt transport protein CorA                     | magnesium and cobalt transport protein CorA                     | CorA1         | MGt5, COBALt5  |
| 143               | cbdbA569                   | DET0590                  | DehaBAV1_0565             | VS531                   | glyceraldehyde-3-phosphate dehydrogenase, type I                               | glyceraldehyde-3-phosphate dehydrogenase, type I( EC:1.2.1.-, EC:1.2.1.12 ) | glyceraldehyde-3-phosphate dehydrogenase, type I( EC:1.2.1.12 ) | glyceraldehyde-3-phosphate dehydrogenase, type I( EC:1.2.1.12 ) | Epd, Gap      | GAPD, E4PD     |

| Model gene number | CBDB1 core metabolic genes | 195 core metabolic genes | BAV1 core metabolic genes | VS core metabolic genes | CBDB1 annotation                              | 195 annotation                                                    | BAV1 annotation                                                                  | VS annotation                                                          | Model protein | Model reaction             |
|-------------------|----------------------------|--------------------------|---------------------------|-------------------------|-----------------------------------------------|-------------------------------------------------------------------|----------------------------------------------------------------------------------|------------------------------------------------------------------------|---------------|----------------------------|
| 144               | cbdbA573                   | DET0593                  | DehaBAV1_0568             | VS533                   | enolase                                       | enolase( EC:4.2.1.11 )                                            | Phosphopyruvate hydratase( EC:4.2.1.11 )                                         | Phosphopyruvate hydratase( EC:4.2.1.11 )                               | Eno           | ENO                        |
| 145               | cbdbA580                   | DET0599                  | DehaBAV1_0574             | VS539                   | D-3-phosphoglycerate dehydrogenase            | D-3-phosphoglycerate dehydrogenase( EC:1.1.1.95 )                 | D-3-phosphoglycerate dehydrogenase                                               | D-3-phosphoglycerate dehydrogenase                                     | SerA2         | PGCDr, PGCD                |
| 146               | cbdbA581                   | DET0600                  | DehaBAV1_0575             | VS540                   | soluble hydrogenase, tritium exchange subunit | soluble hydrogenase, tritium exchange subunit( EC:1.12.- )        | aminotransferase, class V                                                        | Serine--glyoxylate transaminase( EC:2.6.1.45 )                         | SerC          | PSERTr                     |
| 147               | cbdbA583                   | DET0601                  | DehaBAV1_0576             | VS541                   | tyrosyl-tRNA synthetase                       | tyrosyl-tRNA synthetase( EC:6.1.1.1 )                             | tyrosyl-tRNA synthetase                                                          | tyrosyl-tRNA synthetase                                                | TyrS          | TYRTRS                     |
| 148               | cbdbA584                   | DET0602                  | DehaBAV1_0577             | VS542                   | riboflavin biosynthesis protein RibF          | riboflavin biosynthesis protein RibF                              | riboflavin biosynthesis protein RibF                                             | riboflavin biosynthesis protein RibF                                   | RibF          | FMNAT, RBFK                |
| 149               | cbdbA596                   | DET0614                  | DehaBAV1_0587             | VS552                   | hydrogenase, group 3, VhuG subunit            | hydrogenase, group 3, VhuG subunit, putative                      | NADH ubiquinone oxidoreductase, 20 kDa subunit                                   | NADH ubiquinone oxidoreductase, 20 kDa subunit                         | Nadh5         | NADH6, NADH7, NADH4, NADH8 |
| 150               | cbdbA597                   | DET0615                  | DehaBAV1_0588             | VS553                   | hydrogenase, group 3, VhuA subunit            | hydrogenase, group 3, VhuA subunit, putative                      | nickel-dependent hydrogenase, large subunit                                      | nickel-dependent hydrogenase, large subunit                            | FrdH          | FRHD                       |
| 151               | cbdbA608                   | DET0345                  | DehaBAV1_0324             | VS564                   | ribonucleotide reductase                      | ribonucleotide-diphosphate reductase alpha subunit( EC:1.17.4.1 ) | ribonucleoside-diphosphate reductase, adenosylcobalamin-dependent( EC:1.17.4.1 ) | ribonucleoside-diphosphate reductase, adenosylcobalamin-dependent      | NrdEF         | RNDR3, RNDR1, RNDR4, RNDR2 |
| 152               | cbdbA610                   | DET0624                  | DehaBAV1_0597             | VS565                   | response regulator                            | response regulator                                                | response regulator receiver modulated metal dependent phosphohydrolase           | response regulator receiver modulated metal dependent phosphohydrolase | CyaA          | ADNCYC                     |



| Model gene number | CBDB1 core metabolic genes | 195 core metabolic genes | BAV1 core metabolic genes | VS core metabolic genes | CBDB1 annotation                                                             | 195 annotation                                                                                | BAV1 annotation                                          | VS annotation                                    | Model protein | Model reaction |
|-------------------|----------------------------|--------------------------|---------------------------|-------------------------|------------------------------------------------------------------------------|-----------------------------------------------------------------------------------------------|----------------------------------------------------------|--------------------------------------------------|---------------|----------------|
| 153               | cbdbA615                   | DET0628                  | DehaBAV1_0601             | VS569                   | lysine 2,3-aminomutase                                                       | radical SAM domain protein                                                                    | lysine 2,3-aminomutase YodO family protein( EC:5.4.3.2 ) | lysine 2,3-aminomutase YodO family protein       | KamA          | LYSAM          |
| 154               | cbdbA616                   | DET0629                  | DehaBAV1_0602             | VS570                   | D-ala D-alanine ligase                                                       | D-ala D-ala ligase( EC:6.3.2.4 )                                                              | D-alanine--D-alanine ligase( EC:6.3.2.4 )                | D-alanine--D-alanine ligase( EC:6.3.2.4 )        | MurB, Ddl     | UAPGR, ALAALA  |
| 155               | cbdbA618                   | DET0631                  | DehaBAV1_0604             | VS572                   | cation ABC transporter, periplasmc-binding protein                           | cation ABC transporter, periplasmc-binding protein                                            | periplasmic solute binding protein                       | periplasmic solute binding protein               | ZnuA          | ZN2abc2, MNabc |
| 156               | cbdbA619                   | DET0632                  | DehaBAV1_0605             | VS573                   | cation ABC transporter, ATP-binding protein                                  | cation ABC transporter, ATP-binding protein                                                   | ABC transporter related                                  | ABC transporter related                          | ZnuC          | ZN2abc2, MNabc |
| 157               | cbdbA620                   | DET0633                  | DehaBAV1_0606             | VS574                   | cation ABC transporter, permease protein                                     | cation ABC transporter, permease protein                                                      | ABC-3 protein                                            | ABC-3 protein                                    | ZnuB          | ZN2abc2, MNabc |
| 158               | cbdbA627                   | DET0642                  | DehaBAV1_0614             | VS582                   | putative ribulose-phosphate 3-epimerase                                      | ribulose-phosphate 3-epimerase, putative                                                      | Ribulose-phosphate 3-epimerase( EC:5.1.3.1 )             | Ribulose-phosphate 3-epimerase( EC:5.1.3.1 )     | SgcE          | RPE            |
| 159               | cbdbA628                   | DET0643                  | DehaBAV1_0615             | VS583                   | putative ribose-5-phosphate isomerase                                        | ribose-5-phosphate isomerase B                                                                | sugar-phosphate isomerase, RpiB/LacA/LacB family         | sugar-phosphate isomerase, RpiB/LacA/LacB family | RpiB          | RPI            |
| 160               | cbdbA629                   | DET0644                  | DehaBAV1_0616             | VS584                   | transketolase                                                                | transketolase( EC:2.2.1.1 )                                                                   | transketolase                                            | transketolase                                    | TktB          | TKT1, TKT2     |
| 161               | cbdbA633                   | DET0650                  | DehaBAV1_0620             | VS588                   | ABC-type cobalamin/Fe3+-siderophores transport system, periplasmic component | ABC-type cobalamin/Fe3+-siderophores transport systems, periplasmic binding protein, putative | periplasmic binding protein                              | periplasmic binding protein                      | BtuF          | CBL1abc        |

| Model gene number | CBDB1 core metabolic genes | 195 core metabolic genes | BAV1 core metabolic genes | VS core metabolic genes | CBDB1 annotation                                                                     | 195 annotation                                                                       | BAV1 annotation                                                                       | VS annotation                                                                         | Model protein | Model reaction    |
|-------------------|----------------------------|--------------------------|---------------------------|-------------------------|--------------------------------------------------------------------------------------|--------------------------------------------------------------------------------------|---------------------------------------------------------------------------------------|---------------------------------------------------------------------------------------|---------------|-------------------|
| 162               | cbdbA635                   | DET0651                  | DehaBAV1_0621             | VS589                   | ABC-type cobalamin/Fe3+-siderophores transport system, permease component            | ABC-type cobalamin/Fe3+-siderophores transport systems, permease component           | transport system permease protein                                                     | transport system permease protein                                                     | BtuC          | CBL1abc           |
| 163               | cbdbA636                   | DET0652                  | DehaBAV1_0622             | VS590                   | ABC-type cobalamin/Fe3+-siderophores transport system, ATPase component              | ABC-type cobalamin/Fe3+-siderophores transport system, ATP-binding protein           | ABC transporter related                                                               | ABC transporter related                                                               | BtuD          | CBL1abc           |
| 164               | cbdbA638                   | DET0654                  | DehaBAV1_0624             | VS592                   | cobalamin biosynthesis protein                                                       | cobalamin biosynthesis protein CobD                                                  | cobalamin biosynthesis protein CobD                                                   | cobalamin biosynthesis protein CobD                                                   | CbiB          | ADCOBAS, ADCPS2   |
| 165               | cbdbA639                   | DET0655                  | DehaBAV1_0625             | VS593                   | putative threonine-phosphate decarboxylase (L-threonine-O-3-phosphate decarboxylase) | histidinol-phosphate aminotransferase, putative                                      | aminotransferase, class I and II                                                      | aminotransferase, class I and II                                                      | CobQ-CobD     | THRPD             |
| 166               | cbdbA641                   | DET0657                  | DehaBAV1_0626             | VS595                   | nicotinate-nucleotide-dimethylbenzimidazole phosphoribosyltransferase                | nicotinate-nucleotide-dimethylbenzimidazole phosphoribosyltransferase( EC:2.4.2.21 ) | Nicotinate-nucleotide--dimethylbenzimidazole phosphoribosyltransferase( EC:2.4.2.21 ) | Nicotinate-nucleotide--dimethylbenzimidazole phosphoribosyltransferase( EC:2.4.2.21 ) | CobT          | NNDMBRT3, NNDMBRT |
| 167               | cbdbA642                   | DET0658                  | DehaBAV1_0627             | VS596                   | cobalamin 5'-phosphate synthase                                                      | cobalamin 5'-phosphate synthase                                                      | cobalamin 5'-phosphate synthase                                                       | cobalamin 5'-phosphate synthase                                                       | CobS          | COBPS, COBPS2     |
| 168               | cbdbA643                   | DET0659                  | DehaBAV1_0628             | VS597                   | alpha-ribazole-5-phosphate phosphatase                                               | alpha-ribazole-5-phosphate phosphatase, putative                                     | Phosphoglycerate mutase                                                               | Phosphoglycerate mutase                                                               | CobC          | RBZP              |

| Model gene number | CBDB1 core metabolic genes | 195 core metabolic genes | BAV1 core metabolic genes | VS core metabolic genes | CBDB1 annotation                                                 | 195 annotation                                                                                 | BAV1 annotation                                                            | VS annotation                                                              | Model protein | Model reaction       |
|-------------------|----------------------------|--------------------------|---------------------------|-------------------------|------------------------------------------------------------------|------------------------------------------------------------------------------------------------|----------------------------------------------------------------------------|----------------------------------------------------------------------------|---------------|----------------------|
| 169               | cbdbA644                   | DET0660                  | DehaBAV1_0629             | VS598                   | cobinamide kinase                                                | cobinamide kinase/cobinamide phosphate guanylyltransferase                                     | cobalamin biosynthesis enzyme                                              | cobalamin biosynthesis enzyme                                              | CobU          | ACBIPGT, ADCOBAK     |
| 170               | cbdbA651                   | DET0665                  | DehaBAV1_0634             | VS603                   | carbon monoxide dehydrogenase/acetyl-CoA synthase large subunit  | acetyl-CoA decarbonylase/synthase complex subunit gamma                                        | CO dehydrogenase/acetyl-CoA synthase delta subunit                         | CO dehydrogenase/acetyl-CoA synthase delta subunit                         | CooS          | CODHr                |
| 171               | cbdbA652                   | DET0666                  | DehaBAV1_0635             | VS604                   | carbon monoxide dehydrogenase, alpha subunit                     | acetyl-CoA decarbonylase/synthase complex subunit beta( EC:1.2.99.2 )                          | CO dehydrogenase/acetyl-CoA synthase complex, beta subunit( EC:2.3.1.169 ) | CO dehydrogenase/acetyl-CoA synthase complex, beta subunit( EC:2.3.1.169 ) | CooS          | CODHr                |
| 172               | cbdbA654                   | DET0667                  | DehaBAV1_0636             | VS605                   | carbon monoxide dehydrogenase/acetyl-CoA synthase small subunit  | acetyl-CoA decarbonylase/synthase complex subunit delta                                        | CO dehydrogenase/acetyl-CoA synthase delta subunit                         | CO dehydrogenase/acetyl-CoA synthase delta subunit                         | CooS          | CODHr                |
| 173               | cbdbA656                   | DET0668                  | DehaBAV1_0637             | VS606                   | methylenetetrahydrofolate dehydrogenase                          | methylenetetrahydrofolate dehydrogenase/methylenetetrahydrofolate cyclohydrolase( EC:1.5.1.5 ) | Methylenetetrahydrofolate cyclohydrolase( EC:1.5.1.5, EC:3.5.4.9 )         | Methylenetetrahydrofolate dehydrogenase (NADP+)( EC:1.5.1.5 )              | FoID          | MTHFC, MTHFD         |
| 174               | cbdbA658                   | DET0669                  | DehaBAV1_0638             | VS607                   | carbon monoxide dehydrogenase nickel insertion accessory protein | carbon monoxide dehydrogenase nickel-insertion accessory protein                               | CO dehydrogenase maturation factor-like protein                            | carbon monoxide dehydrogenase nickel-insertion accessory protein           | CooS          | CODHr                |
| 175               | cbdbA660                   | DET0671                  | DehaBAV1_0640             | VS609                   | formate-tetrahydrofolate ligase                                  | formate--tetrahydrofolate ligase( EC:6.3.4.3 )                                                 | Formate--tetrahydrofolate ligase( EC:6.3.4.3 )                             | Formate--tetrahydrofolate ligase( EC:6.3.4.3 )                             | Fhs           | FTHFLr, MTHFC, MTHFD |

| Model gene number | CBDB1 core metabolic genes | 195 core metabolic genes | BAV1 core metabolic genes | VS core metabolic genes | CBDB1 annotation                                    | 195 annotation                                                 | BAV1 annotation                                                                  | VS annotation                                                        | Model protein    | Model reaction  |
|-------------------|----------------------------|--------------------------|---------------------------|-------------------------|-----------------------------------------------------|----------------------------------------------------------------|----------------------------------------------------------------------------------|----------------------------------------------------------------------|------------------|-----------------|
| 176               | cbdbA662                   | DET0673                  | DehaBAV1_0642             | VS611                   | hypothetical protein                                | hypothetical protein                                           | hypothetical protein                                                             | hypothetical protein                                                 | LpxB             | LPADSS          |
| 177               | cbdbA663                   | DET0708                  | DehaBAV1_0643             | VS612                   | aspartyl-tRNA synthetase                            | aspartyl-tRNA synthetase( EC:6.1.1.12 )                        | aspartyl-tRNA synthetase                                                         | aspartyl-tRNA synthetase                                             | AspS             | ASPTRS          |
| 178               | cbdbA667                   | DET0711                  | DehaBAV1_0646             | VS618                   | carbohydrate kinase, PfkB family                    | carbohydrate kinase, PfkB family                               | PfkB domain protein                                                              | PfkB domain protein                                                  | RbsK             | RBK             |
| 179               | cbdbA668                   | DET0712                  | DehaBAV1_0647             | VS619                   | probable phosphoribosylglycine amide transformylase | phosphoribosylglycine amide transformylase, putative           | Folate-dependent phosphoribosylglycine amide formyltransferase PurN-like protein | formyl transferase domain protein                                    | PurN             | GARFT           |
| 180               | cbdbA678                   | DET0722                  | DehaBAV1_0655             | VS628                   | putative antiporter GerN                            | sodium/hydrogen exchanger family protein                       | sodium/hydrogen exchanger                                                        | sodium/hydrogen exchanger                                            | KefC2            | Kt6             |
| 181               | cbdbB16                    | DET0724                  | DehaBAV1_0656             | VS630                   | pyruvic-ferredoxin oxidoreductase, gamma subunit    | pyruvic-ferredoxin oxidoreductase, gamma subunit( EC:1.2.7.1 ) | pyruvate/ketoisovalerate oxidoreductase, gamma subunit( EC:1.2.7.1 )             | pyruvate/ketoisovalerate oxidoreductase, gamma subunit( EC:1.2.7.1 ) | Pfor, Ofo        | OOR2r, POR      |
| 182               | cbdbA680                   | DET0725                  | DehaBAV1_0657             | VS631                   | pyruvic-ferredoxin oxidoreductase, delta subunit    | pyruvic-ferredoxin oxidoreductase, delta subunit( EC:1.2.7.1 ) | pyruvate ferredoxin/ferredoxin oxidoreductase, delta subunit                     | pyruvate ferredoxin/ferredoxin oxidoreductase, delta subunit         | Pfor, Ofo        | OOR2r, POR      |
| 183               | cbdbA681                   | DET0726                  | DehaBAV1_0658             | VS632                   | pyruvic-ferredoxin oxidoreductase, alpha subunit    | pyruvic-ferredoxin oxidoreductase, alpha subunit( EC:1.2.7.1 ) | pyruvate flavodoxin/ferredoxin oxidoreductase domain protein                     | pyruvate flavodoxin/ferredoxin oxidoreductase domain protein         | Pfor, Ofo, PdhAB | OOR2r, PDH, POR |
| 184               | cbdbA682                   | DET0727                  | DehaBAV1_0659             | VS633                   | pyruvic-ferredoxin oxidoreductase, beta subunit     | pyruvic-ferredoxin oxidoreductase, beta subunit( EC:1.2.7.1 )  | thiamine pyrophosphate enzyme domain protein TPP-binding                         | thiamine pyrophosphate enzyme domain protein TPP-binding             | Pfor, Ofo        | OOR2r, POR      |

| Model gene number | CBDB1 core metabolic genes | 195 core metabolic genes | BAV1 core metabolic genes | VS core metabolic genes | CBDB1 annotation                          | 195 annotation                                             | BAV1 annotation                                             | VS annotation                                               | Model protein      | Model reaction                                                   |
|-------------------|----------------------------|--------------------------|---------------------------|-------------------------|-------------------------------------------|------------------------------------------------------------|-------------------------------------------------------------|-------------------------------------------------------------|--------------------|------------------------------------------------------------------|
| 185               | cbdbA683                   | DET0728                  | DehaBAV1_0660             | VS634                   | putative [Fe] hydrogenase, HymA subunit   | [Fe] hydrogenase, HymA subunit, putative                   | NADH dehydrogenase (ubiquinone), 24 kDa subunit             | NADH dehydrogenase (ubiquinone), 24 kDa subunit             | Nadh5              | NADH6, NADH7, NADH4, NADH8                                       |
| 186               | cbdbA684                   | DET0729                  | DehaBAV1_0661             | VS635                   | putative [Fe] hydrogenase, HymB subunit   | [Fe] hydrogenase, HymB subunit, putative                   | NADH dehydrogenase (quinone)( EC:1.6.99.5 )                 | NADH dehydrogenase (quinone)( EC:1.6.99.5 )                 | Nadh5              | NADH6, NADH7, NADH4, NADH8                                       |
| 187               | cbdbA685                   | DET0730                  | DehaBAV1_0662             | VS636                   | putative [Fe] hydrogenase, HymC subunit   | [Fe] hydrogenase, HymC subunit, putative                   | [Fe] hydrogenase, HymC subunit, putative                    | 4Fe-4S ferredoxin, iron-sulfur binding domain protein       | Nadh5, Nadphd, Fdx | NADPH12, NADH6, NADH7, NADH4, FRHD, NADH8                        |
| 188               | cbdbA687                   | DET0732                  | DehaBAV1_0664             | VS638                   | mercuric reductase                        | mercuric reductase, putative                               | FAD-dependent pyridine nucleotide-disulphide oxidoreductase | FAD-dependent pyridine nucleotide-disulphide oxidoreductase | LpdA, MerA         | HGR, GCCc                                                        |
| 189               | cbdbA689                   | DET0736                  | DehaBAV1_0666             | VS642                   | oxidoreductase, short chain dehydrogenase | oxidoreductase, short chain dehydrogenase/reductase family | short-chain dehydrogenase/reductase SDR                     | short-chain dehydrogenase/reductase SDR                     | FabG1              | HDER4, HBUR1, HTDR6, HDDR5, HICR9, HOCR3, HHYR2, HHDR7, HODR8_#1 |
| 190               | cbdbA714                   | DET0739                  | DehaBAV1_0669             | VS646                   | putative aspartate aminotransferase       | aspartate aminotransferase                                 | aminotransferase, class I and II                            | aminotransferase, class I and II                            | DapAT, AspC        | ASPTA1, DAPAT                                                    |
| 191               | cbdbA715                   | DET0740                  | DehaBAV1_0670             | VS647                   | diaminopimelate epimerase                 | diaminopimelate epimerase( EC:5.1.1.7 )                    | Diaminopimelate epimerase( EC:5.1.1.7 )                     | Diaminopimelate epimerase( EC:5.1.1.7 )                     | DapF               | DAPE                                                             |
| 192               | cbdbA717                   | DET0742                  | DehaBAV1_0672             | VS649                   | triosephosphate isomerase                 | triosephosphate isomerase( EC:5.3.1.1 )                    | Triose-phosphate isomerase( EC:5.3.1.1 )                    | Triose-phosphate isomerase( EC:5.3.1.1 )                    | TpiA               | TPI                                                              |

| Model gene number | CBDB1 core metabolic genes | 195 core metabolic genes | BAV1 core metabolic genes | VS core metabolic genes | CBDB1 annotation                                                           | 195 annotation                                          | BAV1 annotation                                               | VS annotation                                                 | Model protein | Model reaction |
|-------------------|----------------------------|--------------------------|---------------------------|-------------------------|----------------------------------------------------------------------------|---------------------------------------------------------|---------------------------------------------------------------|---------------------------------------------------------------|---------------|----------------|
| 193               | cbdbA718                   | DET0743                  | DehaBAV1_0673             | VS650                   | putative phosphoglycerate mutase,2,3-bisphosphoglycerate-independent       | cofactor-independent phosphoglycerate mutase            | phosphonopyruvate decarboxylase-related protein( EC:5.4.2.1 ) | phosphonopyruvate decarboxylase-related protein( EC:5.4.2.1 ) | Pgml          | PGM            |
| 194               | cbdbA719                   | DET0744                  | DehaBAV1_0674             | VS651                   | phosphoglycerate kinase                                                    | phosphoglycerate kinase( EC:2.7.2.3 )                   | Phosphoglycerate kinase( EC:2.7.2.3 )                         | Phosphoglycerate kinase( EC:2.7.2.3 )                         | Pgk           | PGK            |
| 195               | cbdbA720                   | DET0745                  | DehaBAV1_0675             | VS652                   | deoxyxylulose-5-phosphate synthase                                         | 1-deoxy-D-xylulose-5-phosphate synthase( EC:2.2.1.7 )   | deoxyxylulose-5-phosphate synthase( EC:2.2.1.7 )              | deoxyxylulose-5-phosphate synthase( EC:2.2.1.7 )              | Dxs           | DXPS           |
| 196               | cbdbA722                   | DET0749                  | DehaBAV1_0677             | VS655                   | putative hypoxanthine phosphoribosyl transferase with additional GAF motif | hypoxanthine phosphoribosyltransferase( EC:2.4.2.8 )    | putative GAF sensor protein( EC:2.4.2.8 )                     | putative GAF sensor protein( EC:2.4.2.8 )                     | Hpt           | GUAPRT, HXPRT  |
| 197               | cbdbA726                   | DET0753                  | DehaBAV1_0681             | VS659                   | threonyl-tRNA synthetase                                                   | threonyl-tRNA synthetase( EC:6.1.1.3 )                  | threonyl-tRNA synthetase                                      | Anticodon-binding domain protein                              | ThrS          | THRTRS         |
| 198               | cbdbA730                   | DET0758                  | DehaBAV1_0685             | VS664                   | conserved hypothetical protein                                             | conserved hypothetical protein TIGR00044                | alanine racemase domain protein                               | alanine racemase domain protein                               | DapE          | SDPDS          |
| 199               | cbdbA733                   | DET0760                  | DehaBAV1_0687             | VS666                   | polypeptide deformylase                                                    | peptide deformylase( EC:3.5.1.88 )                      | peptide deformylase( EC:3.5.1.88 )                            | peptide deformylase( EC:3.5.1.88 )                            | Def           | FMETDF         |
| 200               | cbdbA738                   | DET0766                  | DehaBAV1_0692             | VS672                   | V-type H(+)-translocating pyrophosphatase                                  | V-type H(+)-translocating pyrophosphatase( EC:3.6.1.1 ) | V-type H(+)-translocating pyrophosphatase( EC:3.6.1.1 )       | V-type H(+)-translocating pyrophosphatase( EC:3.6.1.1 )       | Ppa1          | PPA_1          |
| 201               | cbdbA749                   | DET0775                  | DehaBAV1_0701             | VS681                   | thiamine biosynthesis protein ThiC                                         | thiamine biosynthesis protein ThiC                      | thiamine biosynthesis protein ThiC                            | thiamine biosynthesis protein ThiC                            | ThiC          | AMPMS, AHMMP5  |
| 202               | cbdbA752                   | DET0778                  | DehaBAV1_0704             | VS684                   | thymidylate kinase                                                         | thymidylate kinase( EC:2.7.4.9 )                        | dTMP kinase( EC:2.7.4.9 )                                     | dTMP kinase( EC:2.7.4.9 )                                     | Tmk           | DTMPK, TMDK1   |

| Model gene number | CBDB1 core metabolic genes | 195 core metabolic genes | BAV1 core metabolic genes | VS core metabolic genes | CBDB1 annotation                                 | 195 annotation                                                      | BAV1 annotation                                                 | VS annotation                                                   | Model protein | Model reaction                    |
|-------------------|----------------------------|--------------------------|---------------------------|-------------------------|--------------------------------------------------|---------------------------------------------------------------------|-----------------------------------------------------------------|-----------------------------------------------------------------|---------------|-----------------------------------|
| 203               | cbdbA758                   | DET0782                  | DehaBAV1_0708             | VS688                   | putative thiamine-phosphate pyrophosphorylase    | ThiE-associated domain protein/thiamine-phosphate pyrophosphorylase | thiamine-phosphate pyrophosphorylase( EC:2.5.1.3 )              | thiamine-phosphate pyrophosphorylase( EC:2.5.1.3 )              | ThiE          | HMPK4, TMPPP, HMPK1, HMPK3, HMPK2 |
| 204               | cbdbA761                   | DET0784                  | DehaBAV1_0710             | VS690                   | V-type H(+)-translocating pyrophosphatase        | V-type H(+)-translocating pyrophosphatase( EC:3.6.1.1 )             | V-type H(+)-translocating pyrophosphatase( EC:3.6.1.1 )         | V-type H(+)-translocating pyrophosphatase( EC:3.6.1.1 )         | Ppa1          | PPA_1                             |
| 205               | cbdbA762                   | DET0785                  | DehaBAV1_0711             | VS691                   | metallo-beta-lactamase family protein            | metallo-beta-lactamase family protein                               | beta-lactamase domain protein                                   | beta-lactamase domain protein                                   | GloB          | GLYOX                             |
| 206               | cbdbA765                   | DET0787                  | DehaBAV1_0713             | VS693                   | glycyl-tRNA synthetase                           | glycyl-tRNA synthetase( EC:6.1.1.14 )                               | glycyl-tRNA synthetase                                          | glycyl-tRNA synthetase                                          | GlyQS         | GLYTRS                            |
| 207               | cbdbA767                   | DET0789                  | DehaBAV1_0715             | VS695                   | pseudouridine synthase, RsuA family              | pseudouridine synthase, RsuA family                                 | pseudouridine synthase                                          | pseudouridine synthase                                          | RluB          | PSUDS                             |
| 208               | cbdbA769                   | DET0791                  | DehaBAV1_0717             | VS697                   | adenine deaminase                                | adenine deaminase( EC:3.5.4.2 )                                     | adenine deaminase( EC:3.5.4.2 )                                 | adenine deaminase( EC:3.5.4.2 )                                 | AdeC          | ADD                               |
| 209               | cbdbA770                   | DET0792                  | DehaBAV1_0718             | VS698                   | hypoxanthine phosphoribosyltransferase           | hypoxanthine phosphoribosyltransferase( EC:2.4.2.8 )                | hypoxanthine phosphoribosyltransferase( EC:2.4.2.8 )            | hypoxanthine phosphoribosyltransferase( EC:2.4.2.8 )            | Hpt           | GUAPRT, HXPRT                     |
| 210               | cbdbA780                   | DET0802                  | DehaBAV1_0726             | VS706                   | aspartate 1-decarboxylase                        | aspartate 1-decarboxylase precursor( EC:4.1.1.11 )                  | aspartate 1-decarboxylase( EC:4.1.1.11 )                        | aspartate 1-decarboxylase( EC:4.1.1.11 )                        | PanD          | ASP1DC                            |
| 211               | cbdbA781                   | DET0803                  | DehaBAV1_0727             | VS707                   | 3-methyl-2-oxobutanoate hydroxymethyltransferase | 3-methyl-2-oxobutanoate hydroxymethyltransferase( EC:2.1.2.11 )     | 3-methyl-2-oxobutanoate hydroxymethyltransferase( EC:2.1.2.11 ) | 3-methyl-2-oxobutanoate hydroxymethyltransferase( EC:2.1.2.11 ) | PanB          | MOHMT                             |
| 212               | cbdbA782                   | DET0804                  | DehaBAV1_0728             | VS708                   | pantoate-beta-alanine ligase                     | pantoate--beta-alanine ligase( EC:6.3.2.1 )                         | pantoate--beta-alanine ligase( EC:6.3.2.1 )                     | pantoate--beta-alanine ligase( EC:6.3.2.1 )                     | PanC          | PANTS                             |

| Model gene number | CBDB1 core metabolic genes | 195 core metabolic genes | BAV1 core metabolic genes | VS core metabolic genes | CBDB1 annotation                             | 195 annotation                                              | BAV1 annotation                                                               | VS annotation                                                                 | Model protein | Model reaction                              |
|-------------------|----------------------------|--------------------------|---------------------------|-------------------------|----------------------------------------------|-------------------------------------------------------------|-------------------------------------------------------------------------------|-------------------------------------------------------------------------------|---------------|---------------------------------------------|
| 213               | cbdbA795                   | DET0817                  | DehaBAV1_0737             | VS721                   | ABC transporter, ATP-binding protein         | ABC transporter, ATP-binding protein                        | ABC transporter related                                                       | ABC transporter related                                                       | CysAP         | TSULabc, SULabc                             |
| 214               | cbdbA796                   | DET0819                  | DehaBAV1_0738             | VS723                   | thymidylate synthase                         | thymidylate synthase, putative                              | Thymidylate synthase-like protein                                             | thymidylate synthase                                                          | ThyA, DfrA    | TMDS, DHFOR3, DHFR, DHFOR2                  |
| 215               | cbdbA802                   | DET0824                  | DehaBAV1_0743             | VS728                   | probable nitroreductase family protein       | nitroreductase family protein                               | nitroreductase                                                                | nitroreductase family protein                                                 | GlgC          | GLGC                                        |
| 216               | cbdbA803                   | DET0825                  | DehaBAV1_0744             | VS729                   | 2-isopropylmalate synthase                   | 2-isopropylmalate synthase                                  | 2-isopropylmalate synthase/homocitrate synthase family protein( EC:2.3.3.13 ) | 2-isopropylmalate synthase/homocitrate synthase family protein( EC:2.3.3.13 ) | LeuA, CimA    | IPPS, CITRMS                                |
| 217               | cbdbA804                   | DET0826                  | DehaBAV1_0745             | VS730                   | 3-isopropylmalate dehydrogenase              | 3-isopropylmalate dehydrogenase( EC:1.1.1.85 )              | 3-isopropylmalate dehydrogenase( EC:1.1.1.85 )                                | 3-isopropylmalate dehydrogenase( EC:1.1.1.85 )                                | LeuB          | IPMD                                        |
| 218               | cbdbA805                   | DET0827                  | DehaBAV1_0746             | VS731                   | 3-isopropylmalate dehydratase, small subunit | 3-isopropylmalate dehydratase, small subunit( EC:4.2.1.33 ) | 3-isopropylmalate dehydratase, small subunit                                  | 3-isopropylmalate dehydratase, small subunit                                  | LeuCD, Aco3   | MICITH, ACONT, IPPMIb, IPPMIa, IPMI1, IPMI2 |
| 219               | cbdbA806                   | DET0828                  | DehaBAV1_0747             | VS732                   | 3-isopropylmalate dehydratase, large subunit | 3-isopropylmalate dehydratase, large subunit( EC:4.2.1.33 ) | 3-isopropylmalate dehydratase, large subunit( EC:4.2.1.33 )                   | 3-isopropylmalate dehydratase, large subunit( EC:4.2.1.33 )                   | LeuCD, Aco3   | MICITH, ACONT, IPPMIb, IPPMIa, IPMI1, IPMI2 |
| 220               | cbdbA808                   | DET0830                  | DehaBAV1_0749             | VS734                   | 2-isopropylmalate synthase                   | 2-isopropylmalate synthase( EC:2.3.3.13 )                   | 2-isopropylmalate synthase                                                    | 2-isopropylmalate synthase                                                    | LeuA          | IPPS                                        |
| 221               | cbdbA811                   | DET0831                  | DehaBAV1_0750             | VS735                   | ketol-acid reductoisomerase                  | ketol-acid reductoisomerase( EC:1.1.1.86 )                  | ketol-acid reductoisomerase( EC:1.1.1.86 )                                    | ketol-acid reductoisomerase( EC:1.1.1.86 )                                    | IlvC, YlbQ    | KARA1, DPR, KARA2                           |
| 222               | cbdbA812                   | DET0832                  | DehaBAV1_0751             | VS736                   | acetolactate synthase, small subunit         | acetolactate synthase, small subunit( EC:4.1.3.18 )         | acetolactate synthase, small subunit                                          | acetolactate synthase, small subunit                                          | IlvBH         | ACLS, ACHBS                                 |



| Model gene number | CBDB1 core metabolic genes | 195 core metabolic genes | BAV1 core metabolic genes | VS core metabolic genes | CBDB1 annotation                                            | 195 annotation                                                                    | BAV1 annotation                                                            | VS annotation                                                              | Model protein | Model reaction       |
|-------------------|----------------------------|--------------------------|---------------------------|-------------------------|-------------------------------------------------------------|-----------------------------------------------------------------------------------|----------------------------------------------------------------------------|----------------------------------------------------------------------------|---------------|----------------------|
| 223               | cbdbA813                   | DET0833                  | DehaBAV1_0752             | VS737                   | acetolactate synthase, large subunit                        | acetolactate synthase, large subunit, biosynthetic type( EC:2.2.1.6,EC:4.1.3.18 ) | acetolactate synthase, large subunit, biosynthetic type( EC:2.2.1.6 )      | acetolactate synthase, large subunit, biosynthetic type( EC:2.2.1.6 )      | IlvBH         | ACLS, ACHBS          |
| 224               | cbdbA815                   | DET0834                  | DehaBAV1_0753             | VS738                   | dihydroxy-acid dehydratase                                  | dihydroxy-acid dehydratase( EC:4.2.1.9 )                                          | dihydroxy-acid dehydratase( EC:4.2.1.9 )                                   | dihydroxy-acid dehydratase( EC:4.2.1.9 )                                   | IlvD          | DHAD1, DHAD2, DHAD3  |
| 225               | cbdbA817                   | DET0836                  | DehaBAV1_0755             | VS740                   | GMP synthase                                                | GMP synthase( EC:6.3.5.2 )                                                        | GMP synthase, large subunit                                                | GMP synthase, large subunit                                                | GuaA          | GMPS2                |
| 226               | cbdbA819                   | DET0838                  | DehaBAV1_0757             | VS742                   | phosphoribosylamine-glycine ligase                          | phosphoribosylamine-glycine ligase( EC:6.3.4.13 )                                 | ( EC:6.3.4.13 )                                                            | phosphoribosylamine-glycine ligase( EC:6.3.4.13 )                          | PurD          | PRAGS                |
| 227               | cbdbA820                   | DET0839                  | DehaBAV1_0758             | VS743                   | phosphoribosylaminoimidazole carboxylase, catalytic subunit | phosphoribosylaminoimidazole carboxylase, catalytic subunit( EC:4.1.1.21 )        | phosphoribosylaminoimidazole carboxylase, catalytic subunit( EC:4.1.1.21 ) | phosphoribosylaminoimidazole carboxylase, catalytic subunit( EC:4.1.1.21 ) | PurE          | AIRC                 |
| 228               | cbdbA821                   | DET0840                  | DehaBAV1_0759             | VS744                   | adenylosuccinate lyase                                      | adenylosuccinate lyase( EC:4.3.2.2 )                                              | adenylosuccinate lyase( EC:4.3.2.2 )                                       | adenylosuccinate lyase( EC:4.3.2.2 )                                       | PurB          | ADSL1, ADSL2         |
| 229               | cbdbA823                   | DET0841                  | DehaBAV1_0760             | VS745                   | phosphoribosylaminoimidazole-succinocarboxamide synthase    | phosphoribosylaminoimidazole-succinocarboxamide synthase( EC:6.3.2.6 )            | phosphoribosylaminoimidazole-succinocarboxamide synthase( EC:6.3.2.6 )     | phosphoribosylaminoimidazole-succinocarboxamide synthase( EC:6.3.2.6 )     | PurC          | PRASCS               |
| 230               | cbdbA824                   | DET0842                  | DehaBAV1_0761             | VS746                   | imidazoleglycerol-phosphate dehydratase                     | imidazoleglycerol-phosphate dehydratase( EC:4.2.1.19 )                            | Imidazoleglycerol-phosphate dehydratase( EC:4.2.1.19 )                     | Imidazoleglycerol-phosphate dehydratase( EC:4.2.1.19 )                     | HisB          | IGPDH                |
| 231               | cbdbA825                   | DET0843                  | DehaBAV1_0762             | VS747                   | histidinol-phosphate aminotransferase                       | histidinol-phosphate aminotransferase( EC:2.6.1.9 )                               | histidinol-phosphate aminotransferase                                      | histidinol-phosphate aminotransferase                                      | HisC          | HSTPT, TYRTA, PHETA1 |

| Model gene number | CBDB1 core metabolic genes | 195 core metabolic genes | BAV1 core metabolic genes | VS core metabolic genes | CBDB1 annotation                                  | 195 annotation                                              | BAV1 annotation                                                            | VS annotation                                              | Model protein | Model reaction             |
|-------------------|----------------------------|--------------------------|---------------------------|-------------------------|---------------------------------------------------|-------------------------------------------------------------|----------------------------------------------------------------------------|------------------------------------------------------------|---------------|----------------------------|
| 232               | cbdbA826                   | DET0844                  | DehaBAV1_0763             | VS748                   | histidinol dehydrogenase                          | histidinol dehydrogenase( EC:1.1.1.23 )                     | Histidinol dehydrogenase( EC:1.1.1.23 )                                    | Histidinol dehydrogenase( EC:1.1.1.23 )                    | HisD          | HISTD                      |
| 233               | cbdbA828                   | DET0845                  | DehaBAV1_0764             | VS749                   | probable ATP phosphoribosyltransferase            | ATP phosphoribosyltransferase, putative                     | ATP phosphoribosyltransferase, catalytic region                            | ATP phosphoribosyltransferase, catalytic region            | HisG          | ATPRT                      |
| 234               | cbdbA829                   | DET0846                  | DehaBAV1_0765             | VS750                   | histidyl-tRNA synthetase                          | histidyl-tRNA synthetase, putative                          | Histidine--tRNA ligase( EC:6.1.1.21 )                                      | Histidine--tRNA ligase( EC:6.1.1.21 )                      | HisS2         | HISTRS                     |
| 235               | cbdbA832                   | DET0849                  | DehaBAV1_0768             | VS753                   | biotin-acetyl-CoA-carboxylase ligase              | biotin--acetyl-CoA-carboxylase ligase                       | biotin--acetyl-CoA-carboxylase ligase                                      | biotin--acetyl-CoA-carboxylase ligase                      | BirA          | BACCL                      |
| 236               | cbdbA840                   | DET0858                  | DehaBAV1_0776             | VS761                   | oxygen-independent coproporphyrinogen III oxidase | oxygen-independent coproporphyrinogen III oxidase, putative | putative oxygen-independent coproporphyrinogen III oxidase( EC:1.3.99.22 ) | putative oxygen-independent coproporphyrinogen III oxidase | HemN          | CPPPGOAN2                  |
| 237               | cbdbA841                   | DET0859                  | DehaBAV1_0777             | VS762                   | GTP-binding protein LepA                          | GTP-binding protein LepA                                    | GTP-binding protein LepA                                                   | GTP-binding protein LepA                                   | CysH          | SADT2                      |
| 238               | cbdbA842                   | DET0860                  | DehaBAV1_0778             | VS763                   | hydrogenase, EchA subunit                         | hydrogenase, EchA subunit, putative                         | NADH dehydrogenase (quinone)( EC:1.6.99.5 )                                | NADH dehydrogenase (quinone)( EC:1.6.99.5 )                | FrdH          | FRHD                       |
| 239               | cbdbA843                   | DET0861                  | DehaBAV1_0779             | VS764                   | hydrogenase, EchB subunit                         | hydrogenase, EchB subunit, putative                         | respiratory-chain NADH dehydrogenase, subunit 1                            | respiratory-chain NADH dehydrogenase, subunit 1            | FrdH          | FRHD                       |
| 240               | cbdbA844                   | DET0862                  | DehaBAV1_0780             | VS765                   | hydrogenase, group 4, EchC subunit                | hydrogenase, group 4, EchC subunit, putative                | NADH ubiquinone oxidoreductase, 20 kDa subunit                             | NADH ubiquinone oxidoreductase, 20 kDa subunit             | FrdH          | FRHD                       |
| 241               | cbdbA845                   | DET0863                  | DehaBAV1_0781             | VS766                   | hydrogenase subunit HymA                          | hydrogenase subunit HymA, putative                          | NADH dehydrogenase (ubiquinone), 24 kDa subunit                            | NADH dehydrogenase (ubiquinone), 24 kDa subunit            | Nadh5         | NADH6, NADH7, NADH4, NADH8 |

| Model gene number | CBDB1 core metabolic genes | 195 core metabolic genes | BAV1 core metabolic genes | VS core metabolic genes | CBDB1 annotation                                            | 195 annotation                                              | BAV1 annotation                                             | VS annotation                                               | Model protein       | Model reaction                            |
|-------------------|----------------------------|--------------------------|---------------------------|-------------------------|-------------------------------------------------------------|-------------------------------------------------------------|-------------------------------------------------------------|-------------------------------------------------------------|---------------------|-------------------------------------------|
| 242               | cbdbA846                   | DET0729                  | DehaBAV1_0661             | VS767                   | hydrogenase subunit HymB                                    | [Fe] hydrogenase, HymB subunit, putative                    | NADH dehydrogenase (quinone)( EC:1.6.99.5 )                 | NADH dehydrogenase (quinone)( EC:1.6.99.5 )                 | Nadh5               | NADH6, NADH7, NADH4, NADH8                |
| 243               | cbdbA848                   | DET0865                  | DehaBAV1_0783             | VS768                   | hydrogenase subunit HymC                                    | hydrogenase subunit HymC, putative                          | ferredoxin                                                  | ferredoxin                                                  | Nadphd, Nadhd5, Fdx | NADH6, NADPH12, NADH7, NADH4, FRHD, NADH8 |
| 244               | cbdbA849                   | DET0866                  | DehaBAV1_0784             | VS769                   | putative hydrogenase subunit                                | hydrogenase subunit, putative                               | FAD-dependent pyridine nucleotide-disulphide oxidoreductase | FAD-dependent pyridine nucleotide-disulphide oxidoreductase | GitB                | GLUSy                                     |
| 245               | cbdbA850                   | DET0867                  | DehaBAV1_0785             | VS770                   | hydrogenase, group 4, EchE subunit                          | hydrogenase, group 4, EchE subunit, putative                | NADH-ubiquinone oxidoreductase, chain 49kDa                 | NADH dehydrogenase (ubiquinone)( EC:1.6.5.3 )               | FrdH                | FRHD                                      |
| 246               | cbdbA851                   | DET0868                  | DehaBAV1_0786             | VS771                   | hydrogenase, EchF subunit                                   | hydrogenase, EchF subunit, putative                         | 4Fe-4S ferredoxin, iron sulfur binding domain protein       | 4Fe-4S ferredoxin, iron-sulfur binding domain protein       | FrdH                | FRHD                                      |
| 247               | cbdbA853                   | DET0869                  | DehaBAV1_0787             | VS772                   | lysyl-tRNA synthetase related protein                       | lysyl-tRNA synthetase-related protein                       | tRNA synthetase, class II (D, K and N)                      | tRNA synthetase, class II (D, K and N)                      | LysS                | LYSTRS                                    |
| 248               | cbdbA859                   | DET0908                  | DehaBAV1_0793             | VS780                   | arsenical pump membrane protein                             | arsenical pump membrane protein, putative                   | Arsenical pump membrane protein                             | Arsenical pump membrane protein                             | ArsB                | ARSt1                                     |
| 249               | cbdbA874                   | DET0923                  | DehaBAV1_0807             | VS794                   | proton-translocating NADH-quinone oxidoreductase, A subunit | proton-translocating NADH-quinone oxidoreductase, A subunit | NADH-ubiquinone/plastoquinone oxidoreductase, chain 3       | NADH-ubiquinone/plastoquinone oxidoreductase, chain 3       | Nadh5               | NADH6, NADH7, NADH4, NADH8                |

| Model gene number | CBDB1 core metabolic genes | 195 core metabolic genes | BAV1 core metabolic genes | VS core metabolic genes | CBDB1 annotation                                            | 195 annotation                                                             | BAV1 annotation                                                   | VS annotation                                         | Model protein | Model reaction             |
|-------------------|----------------------------|--------------------------|---------------------------|-------------------------|-------------------------------------------------------------|----------------------------------------------------------------------------|-------------------------------------------------------------------|-------------------------------------------------------|---------------|----------------------------|
| 250               | cbdbA875                   | DET0924                  | DehaBAV1_0808             | VS795                   | proton-translocating NADH-quinone oxidoreductase, B subunit | proton-translocating NADH-quinone oxidoreductase, B subunit( EC:1.6.99.3 ) | NADH-quinone oxidoreductase, B subunit( EC:1.6.99.3,EC:1.6.99.5 ) | NADH-quinone oxidoreductase, B subunit( EC:1.6.99.3 ) | Nadh5         | NADH6, NADH7, NADH4, NADH8 |
| 251               | cbdbA876                   | DET0925                  | DehaBAV1_0809             | VS796                   | proton-translocating NADH-quinone oxidoreductase, C subunit | proton-translocating NADH-quinone oxidoreductase, C subunit                | NADH dehydrogenase (ubiquinone), 30 kDa subunit                   | NADH dehydrogenase (ubiquinone), 30 kDa subunit       | Nadh5         | NADH6, NADH7, NADH4, NADH8 |
| 252               | cbdbA877                   | DET0926                  | DehaBAV1_0810             | VS797                   | proton-translocating NADH-quinone oxidoreductase, D subunit | proton-translocating NADH-quinone oxidoreductase, D subunit                | NADH dehydrogenase I, D subunit( EC:1.6.99.5 )                    | NADH dehydrogenase I, D subunit( EC:1.6.5.3 )         | Nadh5         | NADH6, NADH7, NADH4, NADH8 |
| 253               | cbdbA879                   | DET0927                  | DehaBAV1_0811             | VS798                   | proton-translocating NADH-quinone oxidoreductase, H subunit | proton-translocating NADH-quinone oxidoreductase, H subunit                | NADH dehydrogenase (quinone)( EC:1.6.99.5 )                       | respiratory-chain NADH dehydrogenase, subunit 1       | Nadh5         | NADH6, NADH7, NADH4, NADH8 |
| 254               | cbdbA880                   | DET0928                  | DehaBAV1_0812             | VS799                   | proton-translocating NADH-quinone oxidoreductase, I subunit | proton-translocating NADH-quinone oxidoreductase, I subunit                | NADH-quinone oxidoreductase, chain I                              | NADH-quinone oxidoreductase, chain I                  | Nadh5         | NADH6, NADH7, NADH4, NADH8 |
| 255               | cbdbA881                   | DET0929                  | DehaBAV1_0813             | VS800                   | proton-translocating NADH-quinone oxidoreductase, J subunit | proton-translocating NADH-quinone oxidoreductase, J subunit                | NADH-ubiquinone/plastoquinone oxidoreductase, chain 6             | NADH-ubiquinone/plastoquinone oxidoreductase, chain 6 | Nadh5         | NADH6, NADH7, NADH4, NADH8 |
| 256               | cbdbA882                   | DET0930                  | DehaBAV1_0814             | VS801                   | proton-translocating NADH-quinone oxidoreductase, K subunit | proton-translocating NADH-quinone oxidoreductase, K subunit                | NADH-ubiquinone oxidoreductase, chain 4L                          | NADH-ubiquinone oxidoreductase, chain 4L              | Nadh5         | NADH6, NADH7, NADH4, NADH8 |

| Model gene number | CBDB1 core metabolic genes | 195 core metabolic genes | BAV1 core metabolic genes | VS core metabolic genes | CBDB1 annotation                                              | 195 annotation                                                               | BAV1 annotation                                                          | VS annotation                                                            | Model protein | Model reaction             |
|-------------------|----------------------------|--------------------------|---------------------------|-------------------------|---------------------------------------------------------------|------------------------------------------------------------------------------|--------------------------------------------------------------------------|--------------------------------------------------------------------------|---------------|----------------------------|
| 257               | cbdbA883                   | DET0931                  | DehaBAV1_0815             | VS802                   | proton-translocating NADH-quinone oxidoreductase, L subunit   | proton-translocating NADH-quinone oxidoreductase, L subunit                  | proton-translocating NADH-quinone oxidoreductase, chain L( EC:1.6.99.5 ) | proton-translocating NADH-quinone oxidoreductase, chain L( EC:1.6.99.5 ) | Nadh5         | NADH6, NADH7, NADH4, NADH8 |
| 258               | cbdbA884                   | DET0932                  | DehaBAV1_0816             | VS803                   | proton-translocating NADH-quinone oxidoreductase, M subunit   | proton-translocating NADH-quinone oxidoreductase, M subunit                  | proton-translocating NADH-quinone oxidoreductase, chain M( EC:1.6.99.5 ) | proton-translocating NADH-quinone oxidoreductase, chain M( EC:1.6.99.5 ) | Nadh5         | NADH6, NADH7, NADH4, NADH8 |
| 259               | cbdbA885                   | DET0933                  | DehaBAV1_0817             | VS804                   | proton-translocating NADH-quinone oxidoreductase, N subunit   | proton-translocating NADH-quinone oxidoreductase, N subunit                  | proton-translocating NADH-quinone oxidoreductase, chain N( EC:1.6.99.5 ) | proton-translocating NADH-quinone oxidoreductase, chain N( EC:1.6.99.5 ) | Nadh5         | NADH6, NADH7, NADH4, NADH8 |
| 260               | cbdbA890                   | DET0936                  | DehaBAV1_0820             | VS807                   | cobryric acid synthase CobQ                                   | cobryric acid synthase CobQ                                                  | cobryric acid synthase CobQ                                              | cobryric acid synthase CobQ                                              | CobQ          | CPC3MT, ADCOBHEXS          |
| 261               | cbdbA892                   | DET0938                  | DehaBAV1_0822             | VS809                   | branched-chain amino acid ABC transporter,ATP-binding protein | high-affinity branched chain amino acid ABC transporter, ATP binding protein | ABC transporter related                                                  | ABC transporter related                                                  | BraB          | VALabc, LEUabc, ILEabc     |
| 262               | cbdbA894                   | DET0940                  | DehaBAV1_0824             | VS811                   | acyl-CoA synthetase (AMP-forming) / AMP-acid ligase           | AMP-binding enzyme                                                           | Phenylacetate--CoA ligase( EC:6.2.1.30 )                                 | Phenylacetate--CoA ligase( EC:6.2.1.30 )                                 | PaaK          | PACCOAL                    |
| 263               | cbdbA895                   | DET0941                  | DehaBAV1_0825             | VS812                   | branched chain amino acid ABC transporter,ATP-binding protein | high-affinity branched chain amino acid ABC transporter, ATP binding protein | ABC transporter related                                                  | ABC transporter related                                                  | AziCD         | VALabc, ILEabc, LEUabc     |

| Model gene number | CBDB1 core metabolic genes | 195 core metabolic genes | BAV1 core metabolic genes | VS core metabolic genes | CBDB1 annotation                                                                           | 195 annotation                                                                      | BAV1 annotation                                                                         | VS annotation                                                                              | Model protein | Model reaction                                                                    |
|-------------------|----------------------------|--------------------------|---------------------------|-------------------------|--------------------------------------------------------------------------------------------|-------------------------------------------------------------------------------------|-----------------------------------------------------------------------------------------|--------------------------------------------------------------------------------------------|---------------|-----------------------------------------------------------------------------------|
| 264               | cbdbA896                   | DET0942                  | DehaBAV1_0826             | VS813                   | putative branched-chain amino acid ABC transporter, periplasmic amino acid-binding protein | lipoprotein, putative                                                               | ABC-type branched-chain amino acid transport systems periplasmic component-like protein | putative branched-chain amino acid ABC transporter, periplasmic amino acid-binding protein | AziCD         | VALabc, ILEabc, LEUabc                                                            |
| 265               | cbdbA897                   | DET0943                  | DehaBAV1_0827             | VS814                   | putative branched-chain amino acid ABC transporter, periplasmic amino acid-binding protein | lipoprotein, putative                                                               | ABC-type branched-chain amino acid transport systems periplasmic component-like protein | lipoprotein, putative                                                                      | AziCD         | VALabc, ILEabc, LEUabc                                                            |
| 266               | cbdbA898                   | DET0944                  | DehaBAV1_0828             | VS815                   | branched-chain amino acid ABC transporter, permease protein                                | high-affinity branched-chain amino acid ABC transporter, permease protein, putative | inner-membrane translocator                                                             | inner-membrane translocator                                                                | AziCD         | VALabc, ILEabc, LEUabc                                                            |
| 267               | cbdbA899                   | DET0945                  | DehaBAV1_0829             | VS816                   | branched-chain amino acid ABC transporter, permease protein                                | high-affinity branched-chain amino acid ABC transporter, permease protein, putative | inner-membrane translocator                                                             | inner-membrane translocator                                                                | AziCD         | VALabc, ILEabc, LEUabc                                                            |
| 268               | cbdbA901                   | DET0946                  | DehaBAV1_0830             | VS817                   | acyl-CoA synthetase (AMP-forming) / AMP-acid ligase                                        | AMP-binding protein                                                                 | AMP-dependent synthetase and ligase                                                     | AMP-dependent synthetase and ligase                                                        | FadD          | FACOAL181, FACOAL140, FACOAL160, FACOAL120, FACOAL170(I SO), FACOAL180, FACOAL200 |
| 269               | cbdbA902                   | DET0947                  | DehaBAV1_0831             | VS818                   | indolepyruvate ferredoxin oxidoreductase, alpha subunit                                    | indolepyruvate ferredoxin oxidoreductase, alpha subunit                             | thiamine pyrophosphate enzyme domain protein TPP-binding                                | thiamine pyrophosphate enzyme domain protein TPP-binding                                   | IorAB1        | IOR2, IOR3, IOR                                                                   |

| Model gene number | CBDB1 core metabolic genes | 195 core metabolic genes | BAV1 core metabolic genes | VS core metabolic genes | CBDB1 annotation                                       | 195 annotation                                                  | BAV1 annotation                                        | VS annotation                                          | Model protein | Model reaction                                                                 |
|-------------------|----------------------------|--------------------------|---------------------------|-------------------------|--------------------------------------------------------|-----------------------------------------------------------------|--------------------------------------------------------|--------------------------------------------------------|---------------|--------------------------------------------------------------------------------|
| 270               | cbdbA903                   | DET0948                  | DehaBAV1_0832             | VS819                   | indolepyruvate ferredoxin oxidoreductase, beta subunit | indolepyruvate ferredoxin oxidoreductase, beta subunit          | Indolepyruvate ferredoxin oxidoreductase( EC:1.2.7.8 ) | Indolepyruvate ferredoxin oxidoreductase( EC:1.2.7.8 ) | IorAB1        | IOR2, IOR3, IOR                                                                |
| 271               | cbdbA908                   | DET0953                  | DehaBAV1_0837             | VS824                   | copper-translocating P-type ATPase                     | copper-translocating P-type ATPase( EC:3.6.3.4 )                | heavy metal translocating P-type ATPase( EC:3.6.3.4 )  | copper-translocating P-type ATPase( EC:3.6.3.4 )       | Cudp          | Cuabc                                                                          |
| 272               | cbdbA912                   | DET0956                  | DehaBAV1_0840             | VS827                   | superoxide dismutase                                   | superoxide dismutase( EC:1.15.1.1 )                             | manganese and iron superoxide dismutase                | manganese and iron superoxide dismutase                | SodA          | SOD                                                                            |
| 273               | cbdbA916                   | DET0960                  | DehaBAV1_0851             | VS833                   | imidazoleglycerol phosphate synthase, cyclase subunit  | imidazoleglycerol phosphate synthase, cyclase subunit, putative | histidine biosynthesis protein                         | histidine biosynthesis                                 | HisF          | IG3PS                                                                          |
| 274               | cbdbA921                   | DET0963                  | DehaBAV1_0854             | VS836                   | 3-oxoacyl-[acyl-carrier protein] synthase II           | 3-oxoacyl-[acyl-carrier-protein] synthase II( EC:2.3.1.41 )     | beta-ketoacyl synthase                                 | beta-ketoacyl synthase                                 | FabF          | MCMAT7, AACPAT, MCMAT9, MCMAT4, MCMAT5, ACMAT1, MCMAT2, MCMAT8, MCMAT3, MCMAT6 |
| 275               | cbdbA933                   | DET0971                  | DehaBAV1_0862             | VS844                   | dihydrodipicolinate reductase                          | dihydrodipicolinate reductase( EC:1.3.1.26 )                    | Dihydrodipicolinate reductase( EC:1.3.1.26 )           | Dihydrodipicolinate reductase( EC:1.3.1.26 )           | DapB          | DHDPRy                                                                         |
| 276               | cbdbA934                   | DET0972                  | DehaBAV1_0863             | VS845                   | aspartate-semialdehyde dehydrogenase                   | aspartate-semialdehyde dehydrogenase( EC:1.2.1.11 )             | aspartate-semialdehyde dehydrogenase( EC:1.2.1.11 )    | aspartate-semialdehyde dehydrogenase( EC:1.2.1.11 )    | Asd           | ASAD                                                                           |
| 277               | cbdbA935                   | DET0973                  | DehaBAV1_0864             | VS846                   | dihydrodipicolinate synthase                           | dihydrodipicolinate synthase( EC:4.2.1.52 )                     | dihydrodipicolinate synthase( EC:4.2.1.52 )            | dihydrodipicolinate synthase( EC:4.2.1.52 )            | DapA          | DHDPS                                                                          |
| 278               | cbdbA939                   | DET0976                  | DehaBAV1_0867             | VS849                   | adenylosuccinate synthetase                            | adenylosuccinate synthetase( EC:6.3.4.4 )                       | Adenylosuccinate synthase( EC:6.3.4.4 )                | Adenylosuccinate synthase( EC:6.3.4.4 )                | PurA          | ADSS                                                                           |

| Model gene number | CBDB1 core metabolic genes | 195 core metabolic genes | BAV1 core metabolic genes | VS core metabolic genes | CBDB1 annotation                                    | 195 annotation                                     | BAV1 annotation                                | VS annotation                                  | Model protein    | Model reaction                                                                    |
|-------------------|----------------------------|--------------------------|---------------------------|-------------------------|-----------------------------------------------------|----------------------------------------------------|------------------------------------------------|------------------------------------------------|------------------|-----------------------------------------------------------------------------------|
| 279               | cbdbA940                   | DET0977                  | DehaBAV1_0868             | VS850                   | CDP-alcohol phosphatidyltransferase family protein  | CDP-alcohol phosphatidyltransferase family protein | CDP-alcohol phosphatidyltransferase            | CDP-alcohol phosphatidyltransferase            | PssA1, Cls, PgsA | CDGPT, CLPNS, CDPDSP                                                              |
| 280               | cbdbA942                   | DET0978                  | DehaBAV1_0869             | VS851                   | glycosyl transferase, group 1 family protein        | glycosyl transferase, group 1 family protein       | glycosyl transferase, group 1                  | glycosyl transferase, group 1                  | GlgA1            | GLCS1                                                                             |
| 281               | cbdbA945                   | DET0981                  | DehaBAV1_0872             | VS853                   | tRNA pseudouridine synthase B                       | tRNA pseudouridine synthase B ( EC:4.2.1.70 )      | tRNA pseudouridine synthase B                  | tRNA pseudouridine synthase B ( EC:4.2.1.70 )  | RluB             | PSUDS                                                                             |
| 282               | cbdbA947                   | DET0983                  | DehaBAV1_0874             | VS855                   | translation initiation factor IF-2                  | translation initiation factor IF-2                 | translation initiation factor IF-2             | translation initiation factor IF-2             | CysH             | SADT2                                                                             |
| 283               | cbdbA960                   | DET0997                  | DehaBAV1_0888             | VS869                   | translation elongation factor Tu                    | translation elongation factor Tu                   | translation elongation factor Tu               | translation elongation factor Tu               | CysH             | SADT2                                                                             |
| 284               | cbdbA963                   | DET1002                  | DehaBAV1_0890             | VS874                   | glycosyl transferase, group 1 family protein        | glycosyl transferase, group 1 family protein       | glycosyl transferase, group 1                  | glycosyl transferase, group 1                  | GlgA1            | GLCS1                                                                             |
| 285               | cbdbA988                   | DET1015                  | DehaBAV1_0902             | VS886                   | acyl-CoA synthetase (AMP-forming) / AMP-acid ligase | phenylacetate-CoA ligase( EC:6.2.1.30 )            | Phenylacetate--CoA ligase( EC:6.2.1.30 )       | Phenylacetate--CoA ligase( EC:6.2.1.30 )       | PaaK             | PACCOAL                                                                           |
| 286               | cbdbA1006                  | DET1033                  | DehaBAV1_0916             | VS904                   | acyl-CoA synthetase (AMP-forming) / AMP-acid ligase | long-chain-fatty-acid--CoA ligase, putative        | AMP-dependent synthetase and ligase            | AMP-dependent synthetase and ligase            | FadD             | FACOAL181, FACOAL140, FACOAL160, FACOAL120, FACOAL170(I SO), FACOAL180, FACOAL200 |
| 287               | cbdbA1008                  | DET1035                  | DehaBAV1_0917             | VS905                   | pyridoxal-phosphate dependent TrpB-like enzyme      | tryptophan synthase subunit beta                   | pyridoxal-phosphate dependent TrpB-like enzyme | pyridoxal-phosphate dependent TrpB-like enzyme | TrpB             | TRPS1                                                                             |



| Model gene number | CBDB1 core metabolic genes | 195 core metabolic genes | BAV1 core metabolic genes | VS core metabolic genes | CBDB1 annotation                                            | 195 annotation                                              | BAV1 annotation                                             | VS annotation                                               | Model protein | Model reaction        |
|-------------------|----------------------------|--------------------------|---------------------------|-------------------------|-------------------------------------------------------------|-------------------------------------------------------------|-------------------------------------------------------------|-------------------------------------------------------------|---------------|-----------------------|
| 288               | cbdbA1012                  | DET1038                  | DehaBAV1_0920             | VS908                   | isoleucyl-tRNA synthetase                                   | isoleucyl-tRNA synthetase( EC:6.1.1.5 )                     | isoleucyl-tRNA synthetase                                   | isoleucyl-tRNA synthetase                                   | IleS          | ILETRS                |
| 289               | cbdbA1049                  | DET1122                  | DehaBAV1_0951             | VS940                   | glutamine-dependent NAD(+) synthetase                       | glutamine-dependent NAD(+) synthetase( EC:6.3.5.1 )         | NAD+ synthetase( EC:6.3.5.1 )                               | NAD+ synthetase( EC:6.3.5.1 )                               | NadE2         | NADS2                 |
| 290               | cbdbA1050                  | DET1123                  | DehaBAV1_0952             | VS941                   | glutamine synthetase, type I                                | glutamine synthetase, type I( EC:6.3.1.2 )                  | glutamine synthetase, type I                                | glutamine synthetase, type I( EC:6.3.1.2 )                  | GlnA          | GLNS                  |
| 291               | cbdbA1052                  | DET1125                  | DehaBAV1_0954             | VS943                   | ammonium transporter                                        | ammonium transporter                                        | ammonium transporter                                        | ammonium transporter                                        | AmtB          | NH4t3, NH4t           |
| 292               | cbdbA1054                  | DET1127                  | DehaBAV1_0956             | VS945                   | conserved hypothetical protein                              | hypothetical protein                                        | glutamate synthase, alpha subunit domain protein            | glutamate synthase, alpha subunit domain protein            | GltBD         | GLUSy                 |
| 293               | cbdbA1055                  | DET1128                  | DehaBAV1_0957             | VS946                   | glutamate synthase, alpha subunit                           | glutamate synthase, alpha subunit, putative                 | Glutamate synthase (NADPH)( EC:1.4.1.13 )                   | Glutamate synthase (NADPH)( EC:1.4.1.13 )                   | GltBD         | GLUSy                 |
| 294               | cbdbA1057                  | DET1129                  | DehaBAV1_0958             | VS947                   | imidazoleglycerol phosphate synthase, cyclase subunit       | imidazoleglycerol phosphate synthase, cyclase subunit       | imidazoleglycerol phosphate synthase, cyclase subunit       | imidazoleglycerol phosphate synthase, cyclase subunit       | HisF          | IG3PS                 |
| 295               | cbdbA1058                  | DET1130                  | DehaBAV1_0959             | VS948                   | glutamine amidotransferase, class II                        | glutamine amidotransferase, class II                        | glutamine amidotransferase, class-II                        | glutamine amidotransferase, class-II                        | GltB          | GLUSy                 |
| 296               | cbdbA1059                  | DET1131                  | DehaBAV1_0960             | VS949                   | pyridine nucleotide-disulfide oxidoreductase family protein | pyridine nucleotide-disulfide oxidoreductase family protein | FAD-dependent pyridine nucleotide-disulphide oxidoreductase | FAD-dependent pyridine nucleotide-disulphide oxidoreductase | GltAB, NasDE  | GLUSx, NTRIRy, NTRIRx |

| Model gene number | CBDB1 core metabolic genes | 195 core metabolic genes | BAV1 core metabolic genes | VS core metabolic genes | CBDB1 annotation                                                          | 195 annotation                                                                          | BAV1 annotation                                                           | VS annotation                                                             | Model protein      | Model reaction         |
|-------------------|----------------------------|--------------------------|---------------------------|-------------------------|---------------------------------------------------------------------------|-----------------------------------------------------------------------------------------|---------------------------------------------------------------------------|---------------------------------------------------------------------------|--------------------|------------------------|
| 297               | cbdbA1060                  | DET1132                  | DehaBAV1_0961             | VS950                   | imidazole glycerol phosphate synthase, glutamine amidotransferase subunit | imidazole glycerol phosphate synthase, glutamine amidotransferase subunit( EC:2.4.2.- ) | imidazole glycerol phosphate synthase, glutamine amidotransferase subunit | imidazole glycerol phosphate synthase, glutamine amidotransferase subunit | HisF               | IG3PS                  |
| 298               | cbdbA1061                  | DET1133                  | DehaBAV1_0962             | VS951                   | iron-sulfur cluster-binding protein                                       | iron-sulfur cluster-binding protein                                                     | 4Fe-4S ferredoxin, iron sulfur binding domain protein                     | 4Fe-4S ferredoxin, iron-sulfur binding domain protein                     | GitAB              | GLUSx                  |
| 299               | cbdbA1063                  | DET1135                  | DehaBAV1_0964             | VS953                   | putative O-acetylserine(thiol)-lyase-A related protein                    | cysteine synthase A( EC:2.5.1.47,EC:4.2.9.9.8 )                                         | cysteine synthase A( EC:2.5.1.47 )                                        | cysteine synthase A( EC:2.5.1.47 )                                        | CysKec, IlvA, XylA | CYSS, XYL12i           |
| 300               | cbdbA1067                  | DET1138                  | DehaBAV1_0967             | VS956                   | cobalamin biosynthesis protein                                            | cobalamin biosynthesis protein CobD                                                     | cobalamin biosynthesis protein CobD                                       | cobalamin biosynthesis protein CobD                                       | CbiD               | ADCOBAS, ADCPS2        |
| 301               | cbdbA1069                  | DET1139                  | DehaBAV1_0968             | VS957                   | cob(I)alamin adenosyltransferase                                          | cob(I)alamin adenosyltransferase( EC:2.5.1.17 )                                         | ATP:corrinoide adenosyltransferase BtuR/CobO/CobP                         | ATP:corrinoide adenosyltransferase BtuR/CobO/CobP                         | CobA               | CBLATr, CYRDAAT, CBIAT |
| 302               | cbdbA1070                  | DET1140                  | DehaBAV1_0969             | VS958                   | carbon-nitrogen hydrolase family protein                                  | carbon-nitrogen hydrolase family protein                                                | Nitrilase/cyanide hydratase and apolipoprotein N-acyltransferase          | Nitrilase/cyanide hydratase and apolipoprotein N-acyltransferase          | NadE               | NADS1                  |
| 303               | cbdbA1087                  | DET1180                  | DehaBAV1_0985             | VS964                   | ABC transporter, ATP-binding/permease protein                             | ABC transporter, ATP-binding/permease protein                                           | ABC transporter, transmembrane region                                     | ABC transporter, transmembrane region                                     | ThrB               | HSK                    |
| 304               | cbdbA1092                  | DET1171                  | DehaBAV1_0988             | VS1360                  | putative reductive dehalogenase                                           | reductive dehalogenase, putative                                                        | 4Fe-4S ferredoxin, iron sulfur binding domain protein                     | 4Fe-4S ferredoxin, iron-sulfur binding domain protein                     | RdhA               | RDR1, RDR2             |
| 305               | cbdbA1094                  | DET1170                  | DehaBAV1_0989             | VS1359                  | putative reductive dehalogenase anchoring protein                         | reductive dehalogenase anchoring protein, putative                                      | hypothetical protein                                                      | putative reductive dehalogenase anchoring protein                         | RdhB               | RDR1, RDR2             |

| Model gene number | CBDB1 core metabolic genes | 195 core metabolic genes | BAV1 core metabolic genes | VS core metabolic genes | CBDB1 annotation                             | 195 annotation                                                      | BAV1 annotation                                                  | VS annotation                                                    | Model protein | Model reaction         |
|-------------------|----------------------------|--------------------------|---------------------------|-------------------------|----------------------------------------------|---------------------------------------------------------------------|------------------------------------------------------------------|------------------------------------------------------------------|---------------|------------------------|
| 306               | cbdbA1098                  | DET1184                  | DehaBAV1_0995             | VS967                   | BioY family protein                          | BioY family protein                                                 | BioY protein                                                     | BioY protein                                                     | BioBec        | BTS                    |
| 307               | cbdbA1102                  | DET1187                  | DehaBAV1_0998             | VS970                   | 6,7-dimethyl-8-ribityllumazine synthase      | 6,7-dimethyl-8-ribityllumazine synthase( EC:2.5.1.9 )               | Riboflavin synthase( EC:2.5.1.9 )                                | Riboflavin synthase( EC:2.5.1.9 )                                | RibEH         | RBFSa, RBFSb           |
| 308               | cbdbA1103                  | DET1188                  | DehaBAV1_0999             | VS971                   | 3,4-dihydroxy-2-butanone 4-phosphatesynthase | 3,4-dihydroxy-2-butanone 4-phosphate synthase/GTP cyclohydrolase II | GTP cyclohydrolase II( EC:3.5.4.25 )                             | GTP cyclohydrolase II( EC:3.5.4.25 )                             | RibA          | DB4PS, GTPCII          |
| 309               | cbdbA1104                  | DET1189                  | DehaBAV1_1000             | VS972                   | riboflavin synthase, alpha subunit           | riboflavin synthase subunit alpha( EC:2.5.1.9 )                     | riboflavin synthase, alpha subunit                               | riboflavin synthase, alpha subunit                               | RibEH         | RBFSa, RBFSb           |
| 310               | cbdbA1105                  | DET1190                  | DehaBAV1_1001             | VS973                   | riboflavin biosynthesis protein RibD         | riboflavin biosynthesis protein RibD                                | riboflavin biosynthesis protein RibD( EC:1.1.1.193,EC:3.5.4.26 ) | riboflavin biosynthesis protein RibD( EC:1.1.1.193,EC:3.5.4.26 ) | RibD          | APRAUR, DHPPDA2        |
| 311               | cbdbA1108                  | DET1193                  | DehaBAV1_1004             | VS976                   | orotate phosphoribosyltransferase            | orotate phosphoribosyltransferase( EC:2.4.2.10 )                    | orotate phosphoribosyltransferase                                | orotate phosphoribosyltransferase                                | Apt, PyrE     | ORPT, ADPT             |
| 312               | cbdbA1111                  | DET1196                  | DehaBAV1_1007             | VS979                   | ATP-dependent DNA helicase PcrA              | ATP-dependent DNA helicase PcrA( EC:3.6.1.- )                       | UvrD/REP helicase                                                | UvrD/REP helicase                                                | NtpA, MurAA   | DNMPPA, UAGCVT, DNTPPA |
| 313               | cbdbA1112                  | DET1198                  | DehaBAV1_1008             | VS981                   | pyrimidine operon regulatory protein         | pyrimidine regulatory protein PyrR                                  | phosphoribosyltransferase                                        | Uracil phosphoribosyltransferase( EC:2.4.2.9 )                   | Upp2          | UPPRT                  |
| 314               | cbdbA1113                  | DET1199                  | DehaBAV1_1009             | VS982                   | aspartate carbamoyltransferase               | aspartate carbamoyltransferase( EC:2.1.3.2 )                        | aspartate carbamoyltransferase( EC:2.1.3.2 )                     | aspartate carbamoyltransferase( EC:2.1.3.2 )                     | PyrB          | ASPCT                  |
| 315               | cbdbA1114                  | DET1200                  | DehaBAV1_1010             | VS983                   | dihydroorotase, multifunctional complex type | dihydroorotase( EC:3.5.2.3 )                                        | dihydroorotase, multifunctional complex type( EC:3.5.2.3 )       | dihydroorotase, multifunctional complex type( EC:3.5.2.3 )       | PyrC          | DHORTS                 |

| Model gene number | CBDB1 core metabolic genes | 195 core metabolic genes | BAV1 core metabolic genes | VS core metabolic genes | CBDB1 annotation                                        | 195 annotation                                            | BAV1 annotation                                                  | VS annotation                                                     | Model protein | Model reaction        |
|-------------------|----------------------------|--------------------------|---------------------------|-------------------------|---------------------------------------------------------|-----------------------------------------------------------|------------------------------------------------------------------|-------------------------------------------------------------------|---------------|-----------------------|
| 316               | cbdbA1117                  | DET1201                  | DehaBAV1_1011             | VS984                   | carbamoyl-phosphate synthase, small subunit             | carbamoyl-phosphate synthase small subunit( EC:6.3.5.5 )  | carbamoyl-phosphate synthase, small subunit( EC:6.3.5.5 )        | carbamoyl-phosphate synthase, small subunit( EC:6.3.5.5 )         | CarAB         | CBPSr                 |
| 317               | cbdbA1118                  | DET1202                  | DehaBAV1_1012             | VS985                   | carbamoyl-phosphate synthase, large subunit             | carbamoyl-phosphate synthase, large subunit( EC:6.3.5.5 ) | carbamoyl-phosphate synthase, large subunit                      | carbamoyl-phosphate synthase, large subunit                       | CarAB         | CBPSr                 |
| 318               | cbdbA1119                  | DET1203                  | DehaBAV1_1013             | VS986                   | dihydroorotate dehydrogenase, electron transfer subunit | dihydroorotate dehydrogenase, electron transfer subunit   | oxidoreductase FAD/NAD(P)-binding domain protein                 | oxidoreductase FAD/NAD(P)-binding domain protein                  | PyrK          | DHORDf                |
| 319               | cbdbA1120                  | DET1204                  | DehaBAV1_1014             | VS987                   | GTP cyclohydrolase I                                    | GTP cyclohydrolase I( EC:3.5.4.16 )                       | GTP cyclohydrolase I( EC:3.5.4.16 )                              | GTP cyclohydrolase I( EC:3.5.4.16 )                               | FoIE          | GTPCI                 |
| 320               | cbdbA1122                  | DET1205                  | DehaBAV1_1015             | VS988                   | threonine synthase                                      | threonine synthase( EC:4.2.99.2 )                         | threonine synthase                                               | threonine synthase                                                | ThrC, IlvA    | SERD_Lr, THRS, THRD_L |
| 321               | cbdbA1123                  | DET1206                  | DehaBAV1_1016             | VS989                   | homoserine dehydrogenase                                | homoserine dehydrogenase( EC:1.1.1.3 )                    | Homoserine dehydrogenase( EC:1.1.1.3 )                           | Homoserine dehydrogenase( EC:1.1.1.3 )                            | Hom           | HSDy                  |
| 322               | cbdbA1125                  | DET1208                  | DehaBAV1_1018             | VS991                   | nucleotidyl transferase family protein                  | nucleotidyltransferase family protein                     | Nucleotidyl transferase                                          | Nucleotidyl transferase                                           | Mpg, GlgC     | MAN1PT1, GLGC         |
| 323               | cbdbA1126                  | DET1209                  | DehaBAV1_1019             | VS992                   | acetyl-CoA synthetase                                   | acetyl-CoA synthetase( EC:6.2.1.1 )                       | acetate--CoA ligase( EC:6.2.1.1 )                                | acetate--CoA ligase( EC:6.2.1.1 )                                 | Acs           | ACS                   |
| 324               | cbdbA1136                  | DET1218                  | DehaBAV1_1028             | VS1001                  | HAD-superfamily hydrolase, subfamily IIB                | HAD-superfamily hydrolase, subfamily IIB                  | Cof-like hydrolase                                               | Cof-like hydrolase                                                | SerB          | PSP_L                 |
| 325               | cbdbA1140                  | DET1223                  | DehaBAV1_1032             | VS1005                  | fumarylacetoacetate hydrolase family protein            | fumarylacetoacetate hydrolase family protein              | 5-carboxymethyl-2-hydroxymuconate Delta-isomerase( EC:5.3.3.10 ) | 5-oxopent-3-ene-1,2,5-tricarboxylate decarboxylase( EC:4.1.1.68 ) | P_3.7.1.5     | APYRH                 |

| Model gene number | CBDB1 core metabolic genes | 195 core metabolic genes | BAV1 core metabolic genes | VS core metabolic genes | CBDB1 annotation                                | 195 annotation                                                                             | BAV1 annotation                                                           | VS annotation                                                           | Model protein          | Model reaction                   |
|-------------------|----------------------------|--------------------------|---------------------------|-------------------------|-------------------------------------------------|--------------------------------------------------------------------------------------------|---------------------------------------------------------------------------|-------------------------------------------------------------------------|------------------------|----------------------------------|
| 326               | cbdbA1141                  | DET1224                  | DehaBAV1_1033             | VS1006                  | cob(I)alamin adenosyltransferase                | cob(I)alamin adenosyltransferase( EC:2.5.1.17 )                                            | ATP:corrinoid adenosyltransferase BtuR/CobO/CobP                          | ATP:corrinoid adenosyltransferase BtuR/CobO/CobP                        | CobA                   | CBLATr, CYRDAAT, CBIAT           |
| 327               | cbdbA1142                  | DET1225                  | DehaBAV1_1034             | VS1007                  | conserved hypothetical protein                  | hypothetical protein                                                                       | protein of unknown function DUF100                                        | protein of unknown function DUF100                                      | Fbp                    | FBP                              |
| 328               | cbdbA1143                  | DET1226                  | DehaBAV1_1035             | VS1008                  | non-canonical purine NTP pyrophosphatase, RdgB  | non-canonical purine NTP pyrophosphatase, RdgB/HAM1 family                                 | non-canonical purine NTP pyrophosphatase, rdgB/HAM1 family                | non-canonical purine NTP pyrophosphatase, rdgB/HAM1 family              | IxpP                   | XTPASE, ITPASE                   |
| 329               | cbdbA1158                  | DET1237                  | DehaBAV1_1052             | VS1023                  | formyltetrahydrofolate deformylase              | formyltetrahydrofolate deformylase( EC:3.5.1.10 )                                          | formyltetrahydrofolate deformylase( EC:3.5.1.10 )                         | formyltetrahydrofolate deformylase( EC:3.5.1.10 )                       | PurUec, PurN           | FTHFD, GARFT                     |
| 330               | cbdbA1161                  | DET1241                  | DehaBAV1_1055             | VS1027                  | peptide methionine sulfoxide reductase MsrA     | peptide methionine sulfoxide reductase MsrA( EC:1.8.4.6 )                                  | peptide methionine sulfoxide reductase                                    | peptide methionine sulfoxide reductase                                  | MsrA                   | METSR-S2, METSR-S1               |
| 331               | cbdbA1179                  | DET1256                  | DehaBAV1_1067             | VS1039                  | arginine biosynthesis bifunctional protein ArgJ | bifunctional ornithine acetyltransferase/N-acetylglutamate synthase protein( EC:2.3.1.35 ) | arginine biosynthesis bifunctional protein ArgJ( EC:2.3.1.1,EC:2.3.1.35 ) | arginine biosynthesis bifunctional protein ArgJ( EC:2.3.1.35 )          | ArgJ                   | ORNTAC, ACGS                     |
| 332               | cbdbA1180                  | DET1257                  | DehaBAV1_1068             | VS1040                  | acetylglutamate kinase                          | acetylglutamate kinase( EC:2.7.2.8 )                                                       | acetylglutamate kinase                                                    | acetylglutamate kinase                                                  | ArgB1                  | ACGK                             |
| 333               | cbdbA1181                  | DET1258                  | DehaBAV1_1069             | VS1041                  | acetylnornithine aminotransferase               | acetylnornithine aminotransferase( EC:2.6.1.11 )                                           | acetylnornithine and succinylnornithine aminotransferase( EC:2.6.1.11 )   | acetylnornithine and succinylnornithine aminotransferase( EC:2.6.1.11 ) | GabT, PuuT, ArgD, BioA | AMAOT, ACOTA, SDPTA, ORNTA, ABTA |
| 334               | cbdbA1183                  | DET1260                  | DehaBAV1_1071             | VS1043                  | argininosuccinate synthase                      | argininosuccinate synthase( EC:6.3.4.5 )                                                   | Argininosuccinate synthase( EC:6.3.4.5 )                                  | Argininosuccinate synthase( EC:6.3.4.5 )                                | ArgG                   | ARGSS                            |

| Model gene number | CBDB1 core metabolic genes | 195 core metabolic genes | BAV1 core metabolic genes | VS core metabolic genes | CBDB1 annotation                                | 195 annotation                                               | BAV1 annotation                                             | VS annotation                                               | Model protein    | Model reaction                                                                                                                         |
|-------------------|----------------------------|--------------------------|---------------------------|-------------------------|-------------------------------------------------|--------------------------------------------------------------|-------------------------------------------------------------|-------------------------------------------------------------|------------------|----------------------------------------------------------------------------------------------------------------------------------------|
| 335               | cbdbA1185                  | DET1261                  | DehaBAV1_1072             | VS1044                  | argininosuccinate lyase                         | argininosuccinate lyase( EC:4.3.2.1 )                        | argininosuccinate lyase( EC:4.3.2.1 )                       | argininosuccinate lyase( EC:4.3.2.1 )                       | ArgH, AspA       | ASPT, ARGSL                                                                                                                            |
| 336               | cbdbA1194                  | DET1268                  | DehaBAV1_1079             | VS1051                  | ATP-dependent DNA helicase RecG                 | ATP-dependent DNA helicase RecG( EC:3.6.1.- )                | ATP-dependent DNA helicase RecG                             | ATP-dependent DNA helicase RecG                             | NtpA             | DNMPPA, DNTPPA                                                                                                                         |
| 337               | cbdbA1196                  | DET1270                  | DehaBAV1_1081             | VS1053                  | arginyl-tRNA synthetase                         | arginyl-tRNA synthetase( EC:6.1.1.19 )                       | arginyl-tRNA synthetase( EC:6.1.1.19 )                      | arginyl-tRNA synthetase( EC:6.1.1.19 )                      | ArgS             | ARGTRS                                                                                                                                 |
| 338               | cbdbA1199                  | DET1272                  | DehaBAV1_1083             | VS1055                  | putative enoyl-(acyl-carrier-protein) reductase | enoyl-(acyl-carrier-protein) reductase, putative             | Enoyl-(acyl-carrier-protein) reductase (NADH)( EC:1.3.1.9 ) | Enoyl-(acyl-carrier-protein) reductase (NADH)( EC:1.3.1.9 ) | FabI             | OCDMAT8, ICSMAT9, DDMAT5, HEMAT2, DEMAT4, KAS17, OCMAT3, KAS11, BTMAT1, TDMAT6, HDMAT7                                                 |
| 339               | cbdbA1204                  | DET1276                  | DehaBAV1_1087             | VS1059                  | malonyl CoA-acyl carrier protein transacylase   | malonyl CoA-acyl carrier protein transacylase( EC:2.3.1.39 ) | malonyl CoA-acyl carrier protein transacylase               | malonyl CoA-acyl carrier protein transacylase               | FatB, FabD, FabZ | HOCHL3, HICHL9, FA120ACPH, MACPMT, HODHL8n, FA180ACPH, HBUHL1, HHDHL7, HHYHL2, HDEHL4, HTDHL6, HDDHL5, FA200ACPH, FA160ACPH, FA140ACPH |

| Model gene number | CBDB1 core metabolic genes | 195 core metabolic genes | BAV1 core metabolic genes | VS core metabolic genes | CBDB1 annotation                                                       | 195 annotation                                                                         | BAV1 annotation                                                                        | VS annotation                                                                          | Model protein | Model reaction                                                    |
|-------------------|----------------------------|--------------------------|---------------------------|-------------------------|------------------------------------------------------------------------|----------------------------------------------------------------------------------------|----------------------------------------------------------------------------------------|----------------------------------------------------------------------------------------|---------------|-------------------------------------------------------------------|
| 340               | cbdbA1205                  | DET1277                  | DehaBAV1_1088             | VS1060                  | 3-oxoacyl-acyl carrier protein reductase                               | 3-oxoacyl-acyl carrier protein reductase( EC:1.1.1.100 )                               | 3-oxoacyl-(acyl-carrier-protein) reductase( EC:1.1.1.100 )                             | 3-oxoacyl-(acyl-carrier-protein) reductase( EC:1.1.1.100 )                             | FabG1         | HDER4, HBUR1, HTDR6, HDDR5, HICR9, HOCHR3, HHYR2, HHDR7, HODR8_#1 |
| 341               | cbdbA1212                  | DET1282                  | DehaBAV1_1093             | VS1065                  | glutamate 5-kinase                                                     | gamma-glutamyl kinase( EC:2.7.2.11 )                                                   | glutamate 5-kinase( EC:2.7.2.11 )                                                      | glutamate 5-kinase( EC:2.7.2.11 )                                                      | ProB          | GLU5K                                                             |
| 342               | cbdbA1224                  | DET1288                  | DehaBAV1_1099             | VS1071                  | gamma-glutamyl phosphate reductase                                     | gamma-glutamyl phosphate reductase( EC:1.2.1.41 )                                      | gamma-glutamyl phosphate reductase( EC:1.2.1.41 )                                      | gamma-glutamyl phosphate reductase( EC:1.2.1.41 )                                      | ProA, AldH    | ALDD8b, G5SD                                                      |
| 343               | cbdbA1237                  | DET1298                  | DehaBAV1_1109             | VS1081                  | GTP-binding protein TypA                                               | GTP-binding protein TypA                                                               | small GTP-binding protein                                                              | small GTP-binding protein                                                              | CysH          | SADT2                                                             |
| 344               | cbdbA1238                  | DET1299                  | DehaBAV1_1110             | VS1082                  | major facilitator family transporter                                   | major facilitator family transporter                                                   | General substrate transporter                                                          | General substrate transporter                                                          | ProPec        | GLYBt6, PROt6                                                     |
| 345               | cbdbA1268                  | DET1323                  | DehaBAV1_1134             | VS1105                  | dephospho-CoA kinase                                                   | dephospho-CoA kinase( EC:2.7.1.24 )                                                    | dephospho-CoA kinase( EC:2.7.1.24 )                                                    | dephospho-CoA kinase( EC:2.7.1.24 )                                                    | CoaE          | DPCOAK                                                            |
| 346               | cbdbA1269                  | DET1324                  | DehaBAV1_1135             | VS1106                  | conserved hypothetical protein                                         | hypothetical protein                                                                   | NAD-dependent epimerase/dehydratase                                                    | NAD-dependent epimerase/dehydratase                                                    | GalE          | UDPG4E                                                            |
| 347               | cbdbA1276                  | DET1329                  | DehaBAV1_1140             | VS1111                  | phosphoribosyl-AMP cyclohydrolase                                      | phosphoribosyl-AMP cyclohydrolase( EC:3.5.4.19 )                                       | Phosphoribosyl-AMP cyclohydrolase( EC:3.5.4.19 )                                       | Phosphoribosyl-AMP cyclohydrolase( EC:3.5.4.19 )                                       | HisI_N        | PRATPP, PRAMPC                                                    |
| 348               | cbdbA1278                  | DET1331                  | DehaBAV1_1142             | VS1113                  | phosphoribosylformimino-5-aminoimidazolecarboxamide ribotide isomerase | phosphoribosylformimino-5-aminoimidazole carboxamide ribotide isomerase( EC:5.3.1.16 ) | phosphoribosylformimino-5-aminoimidazole carboxamide ribotide isomerase( EC:5.3.1.16 ) | phosphoribosylformimino-5-aminoimidazole carboxamide ribotide isomerase( EC:5.3.1.16 ) | HisA          | PRMICI                                                            |

| Model gene number | CBDB1 core metabolic genes | 195 core metabolic genes | BAV1 core metabolic genes | VS core metabolic genes | CBDB1 annotation                               | 195 annotation                                                                               | BAV1 annotation                                              | VS annotation                                                    | Model protein | Model reaction   |
|-------------------|----------------------------|--------------------------|---------------------------|-------------------------|------------------------------------------------|----------------------------------------------------------------------------------------------|--------------------------------------------------------------|------------------------------------------------------------------|---------------|------------------|
| 349               | cbdbA1282                  | DET1334                  | DehaBAV1_1145             | VS1116                  | glutamyl-tRNA(gln) amidotransferase, C subunit | glutamyl-tRNA(gln) amidotransferase, C subunit( EC:6.3.5.- )                                 | glutamyl-tRNA(Gln) amidotransferase, C subunit               | glutamyl-tRNA(Gln) amidotransferase, C subunit                   | GatABC        | GLUADT           |
| 350               | cbdbA1284                  | DET1335                  | DehaBAV1_1146             | VS1117                  | glutamyl-tRNA(Gln) amidotransferase, A subunit | glutamyl-tRNA(Gln) amidotransferase, A subunit( EC:6.3.5.- )                                 | glutamyl-tRNA(Gln) amidotransferase, A subunit( EC:3.5.1.4 ) | glutamyl-tRNA(Gln) amidotransferase, A subunit                   | GatABC        | GLUADT           |
| 351               | cbdbA1292                  | DET1342                  | DehaBAV1_1153             | VS1124                  | aspartate aminotransferase                     | aspartate aminotransferase( EC:2.6.1.1 )                                                     | aminotransferase, class I and II( EC:2.6.1.1 )               | aminotransferase, class I and II( EC:2.6.1.1 )                   | AspC, AlaT    | ALATA_L, ASPTA1  |
| 352               | cbdbA1293                  | DET1343                  | DehaBAV1_1154             | VS1125                  | tryptophanyl-tRNA synthetase                   | tryptophanyl-tRNA synthetase( EC:6.1.1.2 )                                                   | tryptophanyl-tRNA synthetase( EC:6.1.1.2 )                   | tryptophanyl-tRNA synthetase( EC:6.1.1.2 )                       | TrpS          | TRPTRS           |
| 353               | cbdbA1294                  | DET1344                  | DehaBAV1_1155             | VS1126                  | hydroxymethylbutenyl pyrophosphate reductase   | hydroxymethylbutenyl pyrophosphate reductase                                                 | hydroxymethylbutenyl pyrophosphate reductase( EC:1.17.1.2 )  | hydroxymethylbutenyl pyrophosphate reductase( EC:1.17.1.2 )      | LytB          | IPDPS, DMPPS     |
| 354               | cbdbA1295                  | DET1345                  | DehaBAV1_1156             | VS1127                  | putative tagatose 1,6-diphosphate aldolase     | tagatose 1,6-diphosphate aldolase                                                            | Tagatose-bisphosphate aldolase( EC:4.1.2.40 )                | Tagatose-bisphosphate aldolase( EC:4.1.2.40 )                    | AgaZ, Fba     | TGBPA, FBA       |
| 355               | cbdbA1296                  | DET1346                  | DehaBAV1_1157             | VS1128                  | carbohydrate kinase, PfkB family               | carbohydrate kinase, PfkB family                                                             | 1-phosphofructokinase( EC:2.7.1.56 )                         | 1-phosphofructokinase( EC:2.7.1.56 )                             | PfkB, FruK    | PFK_2, PFK, F1PK |
| 356               | cbdbA1314                  | DET1363                  | DehaBAV1_1174             | VS1144                  | putative mannosyl-3-phosphoglycerate synthase  | mannosyl-3-phosphoglycerate synthase/mannosyl-3-phosphoglycerate phosphatase( EC:2.4.1.217 ) | mannosyl-3-phosphoglycerate synthase                         | mannosyl-3-phosphoglycerate synthase( EC:2.4.1.217,EC:3.1.3.70 ) | MpgSP         | MPGSP            |
| 357               | cbdbA1316                  | DET1365                  | DehaBAV1_1176             | VS1146                  | glutamyl-tRNA synthetase                       | glutamyl-tRNA synthetase( EC:6.1.1.17 )                                                      | glutamyl-tRNA synthetase( EC:6.1.1.17 )                      | glutamyl-tRNA synthetase( EC:6.1.1.17 )                          | GlnS, GltX    | GLNTRS, GLUTRS   |



| Model gene number | CBDB1 core metabolic genes | 195 core metabolic genes | BAV1 core metabolic genes | VS core metabolic genes | CBDB1 annotation                                               | 195 annotation                                                   | BAV1 annotation                                               | VS annotation                                                 | Model protein | Model reaction             |
|-------------------|----------------------------|--------------------------|---------------------------|-------------------------|----------------------------------------------------------------|------------------------------------------------------------------|---------------------------------------------------------------|---------------------------------------------------------------|---------------|----------------------------|
| 358               | cbdbA1324                  | DET1372                  | DehaBAV1_1183             | VS1153                  | dihydroorotate dehydrogenase                                   | dihydroorotate dehydrogenase( EC:1.3.3.1 )                       | dihydroorotate dehydrogenase family protein                   | dihydroorotate dehydrogenase family protein                   | PyrD          | DHORDf                     |
| 359               | cbdbA1328                  | DET1375                  | DehaBAV1_1186             | VS1156                  | ribosomal large subunit pseudouridine synthase, RluD subfamily | ribosomal large subunit pseudouridine synthase, RluD subfamily   | pseudouridine synthase, RluA family( EC:3.2.1.17 )            | pseudouridine synthase, RluA family( EC:4.2.1.70 )            | RluD          | PSUDS                      |
| 360               | cbdbA1336                  | DET1382                  | DehaBAV1_1192             | VS1163                  | nicotinate-nucleotide pyrophosphorylase                        | nicotinate-nucleotide pyrophosphorylase( EC:2.4.2.19 )           | nicotinate-nucleotide pyrophosphorylase( EC:2.4.2.19 )        | nicotinate-nucleotide pyrophosphorylase( EC:2.4.2.19 )        | NadC1         | NNDPR                      |
| 361               | cbdbA1346                  | DET1390                  | DehaBAV1_1199             | VS1171                  | PAP2 family protein                                            | PAP2 family protein                                              | phosphoesterase, PA-phosphatase related                       | phosphoesterase, PA-phosphatase related                       | PgpA, Pmdpht  | PMDPHT, PGPPH              |
| 362               | cbdbA1353                  | DET1394                  | DehaBAV1_1203             | VS1176                  | ornithine carbamoyltransferase                                 | ornithine carbamoyltransferase ( EC:2.1.3.3 )                    | ornithine carbamoyltransferase( EC:2.1.3.3 )                  | ornithine carbamoyltransferase( EC:2.1.3.3 )                  | ArgF          | OCBT                       |
| 363               | cbdbA1356                  | DET1397                  | DehaBAV1_1206             | VS1179                  | glycerol-3-phosphate dehydrogenase, NAD-dependent              | glycerol-3-phosphate dehydrogenase, NAD-dependent( EC:1.1.1.94 ) | Glycerol-3-phosphate dehydrogenase (NAD(P)(+))( EC:1.1.1.94 ) | Glycerol-3-phosphate dehydrogenase (NAD(P)(+))( EC:1.1.1.94 ) | GpsA          | G3PD1, G3PD2               |
| 364               | cbdbA1359                  | DET1400                  | DehaBAV1_1209             | VS1182                  | co-chaperone protein GrpE                                      | co-chaperone protein GrpE                                        | GrpE protein                                                  | GrpE protein                                                  | NrdD          | RNTR2, RNTR3, RNTR1, RNTR4 |
| 365               | cbdbA1370                  | DET1409                  | DehaBAV1_1216             | VS1190                  | putative transaldolase                                         | transaldolase                                                    | putative transaldolase( EC:2.2.1.2 )                          | putative transaldolase( EC:2.2.1.2 )                          | Tal           | TAL                        |
| 366               | cbdbA1371                  | DET1410                  | DehaBAV1_1217             | VS1191                  | CTP synthase                                                   | CTP synthetase( EC:6.3.4.2 )                                     | CTP synthase( EC:6.3.4.2 )                                    | CTP synthase( EC:6.3.4.2 )                                    | PyrG          | CTPS1, CTPS2               |
| 367               | cbdbA1377                  | DET1415                  | DehaBAV1_1222             | VS1196                  | amidophosphoribosyl transferase                                | amidophosphoribosyl transferase( EC:2.4.2.14 )                   | amidophosphoribosyl transferase( EC:2.4.2.14 )                | amidophosphoribosyl transferase( EC:2.4.2.14 )                | PurF          | GLUPRT                     |

| Model gene number | CBDB1 core metabolic genes | 195 core metabolic genes | BAV1 core metabolic genes | VS core metabolic genes | CBDB1 annotation                                     | 195 annotation                                                                        | BAV1 annotation                                                                       | VS annotation                                                                         | Model protein | Model reaction   |
|-------------------|----------------------------|--------------------------|---------------------------|-------------------------|------------------------------------------------------|---------------------------------------------------------------------------------------|---------------------------------------------------------------------------------------|---------------------------------------------------------------------------------------|---------------|------------------|
| 368               | cbdbA1378                  | DET1416                  | DehaBAV1_1223             | VS1197                  | phosphoribosylformylglycinamide cycloligase          | phosphoribosylamidazole synthetase( EC:6.3.3.1 )                                      | phosphoribosylformylglycinamide cycloligase( EC:6.3.3.1 )                             | phosphoribosylformylglycinamide cycloligase( EC:6.3.3.1 )                             | PurM          | PRAIS            |
| 369               | cbdbA1381                  | DET1417                  | DehaBAV1_1225             | VS1199                  | phosphoribosylamidazolecarboxamide formyltransferase | phosphoribosylamidazolecarboxamide formyltransferase/IMP cyclohydrolase( EC:2.1.2.3 ) | phosphoribosylamidazolecarboxamide formyltransferase/IMP cyclohydrolase( EC:2.1.2.3 ) | phosphoribosylamidazolecarboxamide formyltransferase/IMP cyclohydrolase( EC:2.1.2.3 ) | PurH          | AICART, IMPCir   |
| 370               | cbdbA1382                  | DET1418                  | DehaBAV1_1226             | VS1200                  | putative nicotinate-nucleotide pyrophosphorylase     | nicotinate phosphoribosyltransferase                                                  | Quinolate phosphoribosyltransferase                                                   | Quinolate phosphoribosyltransferase                                                   | PncB          | NCTPPRT, NAMNPP  |
| 371               | cbdbA1384                  | DET1420                  | DehaBAV1_1228             | VS1202                  | SAM-dependent methyltransferase UbiE/COQ5 family     | methyltransferase, UbiE/COQ5 family                                                   | Methyltransferase type 11                                                             | Methyltransferase type 11                                                             | UbiG          | DMQMT, OHPHM     |
| 372               | cbdbA1386                  | DET1422                  | DehaBAV1_1230             | VS1204                  | phosphoglycerate mutase family protein               | phosphoglycerate mutase family protein                                                | Phosphoglycerate mutase                                                               | Phosphoglycerate mutase                                                               | GpmA          | PGM              |
| 373               | cbdbA1441                  | DET1481                  | DehaBAV1_1271             | VS1251                  | anthranilate synthase component I                    | anthranilate synthase component I( EC:4.1.3.27 )                                      | anthranilate synthase component I( EC:4.1.3.27 )                                      | anthranilate synthase component I( EC:4.1.3.27 )                                      | TrpE, PabABC  | ADCL, ADCS, ANS1 |
| 374               | cbdbA1442                  | DET1482                  | DehaBAV1_1272             | VS1252                  | anthranilate synthase component II                   | anthranilate synthase component II( EC:4.1.3.27 )                                     | glutamine amidotransferase of anthranilate synthase( EC:4.1.3.27 )                    | glutamine amidotransferase of anthranilate synthase( EC:4.1.3.27 )                    | TrpG          | ANS1             |
| 375               | cbdbA1444                  | DET1483                  | DehaBAV1_1273             | VS1253                  | anthranilate phosphoribosyltransferase               | anthranilate phosphoribosyltransferase( EC:2.4.2.18 )                                 | anthranilate phosphoribosyltransferase( EC:2.4.2.18 )                                 | anthranilate phosphoribosyltransferase( EC:2.4.2.18 )                                 | TrpD          | ANPRT            |
| 376               | cbdbA1445                  | DET1484                  | DehaBAV1_1274             | VS1254                  | indole-3-glycerol phosphate synthase                 | indole-3-glycerol phosphate synthase( EC:4.1.1.48 )                                   | Indole-3-glycerol phosphate synthase( EC:4.1.1.48 )                                   | Indole-3-glycerol phosphate synthase( EC:4.1.1.48 )                                   | TrpC          | IGPS             |

| Model gene number | CBDB1 core metabolic genes | 195 core metabolic genes | BAV1 core metabolic genes | VS core metabolic genes | CBDB1 annotation                                             | 195 annotation                                                   | BAV1 annotation                                                      | VS annotation                                                        | Model protein | Model reaction |
|-------------------|----------------------------|--------------------------|---------------------------|-------------------------|--------------------------------------------------------------|------------------------------------------------------------------|----------------------------------------------------------------------|----------------------------------------------------------------------|---------------|----------------|
| 377               | cbdbA1447                  | DET1485                  | DehaBAV1_1275             | VS1255                  | N-(5phosphoribosyl)anthranilate isomerase                    | N-(5'phosphoribosyl)anthranilate isomerase( EC:5.3.1.24 )        | Phosphoribosylanthranilate isomerase( EC:5.3.1.24 )                  | Phosphoribosylanthranilate isomerase( EC:5.3.1.24 )                  | TrpF          | PRAI           |
| 378               | cbdbA1449                  | DET1486                  | DehaBAV1_1276             | VS1256                  | 3-deoxy-D-arabinoheptulosonate 7-phosphate (DAHP) synthetase | 3-deoxy-7-phosphoheptulonate synthase( EC:2.5.1.54,EC:4.1.2.15 ) | phospho-2-dehydro-3-deoxyheptonate aldolase( EC:2.5.1.54 )           | phospho-2-dehydro-3-deoxyheptonate aldolase( EC:2.5.1.54 )           | AroA2         | DAHPS          |
| 379               | cbdbA1450                  | DET1487                  | DehaBAV1_1277             | VS1257                  | tryptophan synthase, beta subunit                            | tryptophan synthase subunit beta( EC:4.2.1.20 )                  | tryptophan synthase, beta subunit( EC:4.2.1.20 )                     | tryptophan synthase, beta subunit( EC:4.2.1.20 )                     | TrpB          | TRPS1          |
| 380               | cbdbA1451                  | DET1488                  | DehaBAV1_1278             | VS1258                  | tryptophan synthase, alpha subunit                           | tryptophan synthase, alpha subunit( EC:4.2.1.20 )                | tryptophan synthase, alpha subunit( EC:4.2.1.20 )                    | tryptophan synthase, alpha subunit( EC:4.2.1.20 )                    | TrpA          | TRPS1          |
| 381               | cbdbA1457                  | DET1489                  | DehaBAV1_1279             | VS1265                  | thymidylate synthase ThyX                                    | thymidylate synthase, flavin-dependent( EC:2.1.1.148 )           | thymidylate synthase, flavin-dependent( EC:2.1.1.148 )               | thymidylate synthase, flavin-dependent( EC:2.1.1.148 )               | ThyX          | FDTS           |
| 382               | cbdbA1458                  | DET1490                  | DehaBAV1_1280             | VS1266                  | peptide ABC transporter, ATP-binding protein                 | peptide ABC transporter, ATP-binding protein                     | oligopeptide/dipeptide ABC transporter, ATPase subunit               | ABC transporter related                                              | NikA          | Nlabc          |
| 383               | cbdbA1459                  | DET1491                  | DehaBAV1_1281             | VS1267                  | peptide ABC transporter, ATP-binding protein                 | peptide ABC transporter, ATP-binding protein                     | ABC transporter related                                              | oligopeptide/dipeptide ABC transporter, ATPase subunit               | NikB          | Nlabc          |
| 384               | cbdbA1461                  | DET1492                  | DehaBAV1_1282             | VS1268                  | peptide ABC transporter, permease protein                    | peptide ABC transporter, permease protein                        | binding-protein-dependent transport systems inner membrane component | binding-protein-dependent transport systems inner membrane component | NikC          | Nlabc          |

| Model gene number | CBDB1 core metabolic genes | 195 core metabolic genes | BAV1 core metabolic genes | VS core metabolic genes | CBDB1 annotation                                             | 195 annotation                                                  | BAV1 annotation                                                      | VS annotation                                                        | Model protein | Model reaction             |
|-------------------|----------------------------|--------------------------|---------------------------|-------------------------|--------------------------------------------------------------|-----------------------------------------------------------------|----------------------------------------------------------------------|----------------------------------------------------------------------|---------------|----------------------------|
| 385               | cbdbA1462                  | DET1493                  | DehaBAV1_1283             | VS1269                  | peptide ABC transporter, permease protein                    | peptide ABC transporter, permease protein                       | binding-protein-dependent transport systems inner membrane component | binding-protein-dependent transport systems inner membrane component | NikD          | Nlabc                      |
| 386               | cbdbA1463                  | DET1494                  | DehaBAV1_1284             | VS1270                  | peptide ABC transporter, periplasmic peptide-binding protein | peptide ABC transporter, periplasmic peptide-binding protein    | extracellular solute-binding protein, family 5                       | extracellular solute-binding protein, family 5                       | NikE          | Nlabc                      |
| 387               | cbdbA1475                  | DET1503                  | DehaBAV1_1293             | VS1277                  | ferrous iron transport protein B                             | ferrous iron transport protein B, putative                      | small GTP-binding protein                                            | small GTP-binding protein                                            | FeoB1         | FE2abc                     |
| 388               | cbdbA1637                  | DET1544                  | DehaBAV1_0282             | VS1435                  | putative reductive dehalogenase anchoring protein            | reductive dehalogenase anchoring protein, putative              | hypothetical protein                                                 | putative reductive dehalogenase anchoring protein                    | RdhB          | RDR1, RDR2                 |
| 389               | cbdbA1639                  | DET1547                  | DehaBAV1_1303             | VS1437                  | prephenate dehydratase                                       | prephenate dehydratase( EC:4.2.1.51 )                           | Prephenate dehydratase( EC:4.2.1.51 )                                | Prephenate dehydratase( EC:4.2.1.51 )                                | PheA          | PPNDH, CHORM               |
| 390               | cbdbA1643                  | DET1550                  | DehaBAV1_1307             | VS1440                  | glutamyl-tRNA(Gln) amidotransferase, B subunit               | aspartyl/glutamyl-tRNA amidotransferase subunit B( EC:6.3.5.- ) | glutamyl-tRNA(Gln) amidotransferase, B subunit                       | glutamyl-tRNA(Gln) amidotransferase, B subunit                       | GatABC        | GLUADT                     |
| 391               | cbdbA1652                  | DET1570                  | DehaBAV1_1316             | VS1448                  | hydrogenase, group 4, HycG subunit                           | hydrogenase, group 4, HycG subunit, putative                    | NADH ubiquinone oxidoreductase, 20 kDa subunit                       | NADH ubiquinone oxidoreductase, 20 kDa subunit                       | Nadhd5        | NADH6, NADH7, NADH4, NADH8 |
| 392               | cbdbA1653                  | DET1571                  | DehaBAV1_1317             | VS1449                  | hydrogenase, group 4, HycE subunit                           | hydrogenase, group 4, HycE subunit, putative                    | NADH-ubiquinone oxidoreductase, chain 49kDa                          | NADH-ubiquinone oxidoreductase, chain 49kDa                          | Nadhd5        | NADH6, NADH7, NADH4, NADH8 |
| 393               | cbdbA1655                  | DET1572                  | DehaBAV1_1318             | VS1450                  | hydrogenase, membrane subunit                                | NADH dehydrogenase subunit N                                    | NADH dehydrogenase (quinone)( EC:1.6.99.5 )                          | NADH dehydrogenase (quinone)( EC:1.6.99.5 )                          | Nadhd5        | NADH6, NADH7, NADH4, NADH8 |

| Model gene number | CBDB1 core metabolic genes | 195 core metabolic genes | BAV1 core metabolic genes | VS core metabolic genes | CBDB1 annotation                                                    | 195 annotation                                                                    | BAV1 annotation                                                                   | VS annotation                                                                      | Model protein | Model reaction             |
|-------------------|----------------------------|--------------------------|---------------------------|-------------------------|---------------------------------------------------------------------|-----------------------------------------------------------------------------------|-----------------------------------------------------------------------------------|------------------------------------------------------------------------------------|---------------|----------------------------|
| 394               | cbdbA1656                  | DET1573                  | DehaBAV1_1319             | VS1451                  | putative hydrogenase subunit                                        | hydrogenase subunit, putative                                                     | Hydrogenase 4 membrane component (E)-like protein                                 | hydrogenase subunit, putative                                                      | Nadh5         | NADH6, NADH7, NADH4, NADH8 |
| 395               | cbdbA1658                  | DET1574                  | DehaBAV1_1320             | VS1452                  | hydrogenase, HycD subunit                                           | hydrogenase, HycD subunit, putative                                               | Formate hydrogenlyase subunit 4-like protein                                      | hydrogenase, HycD subunit                                                          | Nadh5         | NADH6, NADH7, NADH4, NADH8 |
| 396               | cbdbA1659                  | DET1575                  | DehaBAV1_1321             | VS1453                  | hydrogenase, HycC subunit                                           | NADH dehydrogenase subunit N                                                      | NADH dehydrogenase (quinone)( EC:1.6.99.5 )                                       | NADH dehydrogenase (quinone)( EC:1.6.99.5 )                                        | Nadh5         | NADH6, NADH7, NADH4, NADH8 |
| 397               | cbdbA1661                  | DET1576                  | DehaBAV1_1322             | VS1454                  | putative methylglyoxal synthase                                     | methylglyoxal synthase, putative( EC:4.2.3.3 )                                    | Methylglyoxal synthase( EC:4.2.3.3 )                                              | MGS domain protein( EC:4.2.3.3 )                                                   | MgsA          | MGSA                       |
| 398               | cbdbA1678                  | DET1588                  | DehaBAV1_1336             | VS1472                  | serine O-acetyltransferase                                          | serine O-acetyltransferase( EC:2.3.1.30 )                                         | serine O-acetyltransferase( EC:2.3.1.30 )                                         | serine O-acetyltransferase( EC:2.3.1.30 )                                          | CysE          | SERAT                      |
| 399               | cbdbA1681                  | DET1590                  | DehaBAV1_1338             | VS1474                  | quinolinate synthetase complex, subunit A                           | quinolinate synthetase                                                            | quinolinate synthetase complex, A subunit( EC:2.1.1.63 )                          | quinolinate synthetase complex, A subunit                                          | NadA          | QULNS                      |
| 400               | cbdbA1683                  | DET1591                  | DehaBAV1_1339             | VS1475                  | SAM-dependent methyltransferase UbiE/COQ5 family                    | methyltransferase, UbiE/COQ5 family( EC:2.1.1.- )                                 | Methyltransferase type 11                                                         | Methyltransferase type 11                                                          | UbiE          | OMBZLM                     |
| 401               | cbdbA1696                  | DET1603                  | DehaBAV1_1349             | VS1485                  | dihydropteroate synthase                                            | dihydropteroate synthase( EC:2.5.1.15 )                                           | dihydropteroate synthase( EC:2.5.1.15 )                                           | dihydropteroate synthase( EC:2.5.1.15 )                                            | FolP, FolB    | DHPS1, DHNPA, DHPS3        |
| 402               | cbdbA1698                  | DET1604                  | DehaBAV1_1350             | VS1486                  | 2-amino-4-hydroxy-6-hydroxymethyldihydropteridine pyrophosphokinase | 2-amino-4-hydroxy-6-hydroxymethyldihydropteridine pyrophosphokinase( EC:2.7.6.3 ) | 2-amino-4-hydroxy-6-hydroxymethyldihydropteridine pyrophosphokinase( EC:2.7.6.3 ) | 2-amino-4-hydroxy-6-hydroxymethyldihydropteridine pyrophosphokinase ( EC:2.7.6.3 ) | FolB, FolK    | DHNPA, HPPK                |

| Model gene number | CBDB1 core metabolic genes | 195 core metabolic genes | BAV1 core metabolic genes | VS core metabolic genes | CBDB1 annotation                                        | 195 annotation                                             | BAV1 annotation                                               | VS annotation                                                 | Model protein | Model reaction                                         |
|-------------------|----------------------------|--------------------------|---------------------------|-------------------------|---------------------------------------------------------|------------------------------------------------------------|---------------------------------------------------------------|---------------------------------------------------------------|---------------|--------------------------------------------------------|
| 403               | cbdbA1699                  | DET1605                  | DehaBAV1_1351             | VS1487                  | 6-pyruvoyl tetrahydrobiopterin synthase                 | 6-pyruvoyl tetrahydrobiopterin synthase, putative          | 6-pyruvoyl tetrahydropterin synthase and hypothetical protein | 6-pyruvoyl tetrahydropterin synthase and hypothetical protein | Ptps          | PTHPS                                                  |
| 404               | cbdbA1708                  | DET1614                  | DehaBAV1_1360             | VS1496                  | homocitrate synthase                                    | homocitrate synthase( EC:4.1.3.21 )                        | 2-isopropylmalate synthase( EC:2.3.3.13 )                     | 2-isopropylmalate synthase( EC:2.3.3.13 )                     | NifV          | HCITS                                                  |
| 405               | cbdbA1722                  | DET1626                  | DehaBAV1_1371             | VS1508                  | N-acetyl-gamma-glutamyl-phosphate reductase             | N-acetyl-gamma-glutamyl-phosphate reductase( EC:1.2.1.38 ) | N-acetyl-gamma-glutamyl-phosphate reductase( EC:1.2.1.38 )    | N-acetyl-gamma-glutamyl-phosphate reductase( EC:1.2.1.38 )    | ArgC          | AGPR                                                   |
| 406               | cbdbA1724                  | DET1627                  | DehaBAV1_1372             | VS1509                  | putative sodium exchanger                               | sodium/hydrogen exchanger family protein                   | sodium/hydrogen exchanger                                     | sodium/hydrogen exchanger                                     | KefC          | Kt6                                                    |
| 407               | cbdbA1731                  | DET1633                  | DehaBAV1_1378             | VS1515                  | aspartate kinase, monofunctional class                  | aspartate kinase, monofunctional class( EC:2.7.2.4 )       | aspartate kinase( EC:2.7.2.4 )                                | aspartate kinase( EC:2.7.2.4 )                                | AspK          | ASPK                                                   |
| 408               | cbdbA1734                  | DET1635                  | DehaBAV1_1380             | VS1517                  | bisphosphoglycerate-independent phosphoglycerate mutase | cofactor-independent phosphoglycerate mutase               | proposed homoserine kinase( EC:5.4.2.1 )                      | proposed homoserine kinase( EC:5.4.2.1 )                      | Pgml          | PGM                                                    |
| 409               | cbdbA1735                  | DET1637                  | DehaBAV1_1381             | VS1519                  | mazG family protein                                     | mazG family protein                                        | MazG family protein                                           | MazG family protein                                           | MazG          | NTPP4, NTPP3, NTPP1, NTPP2, NTPP5, NTPP8, NTPP7, NTPP6 |
| 410               | cbdbA1741                  | DET1641                  | DehaBAV1_1385             | VS1523                  | aldolase, class II                                      | L-fuculose phosphate aldolase                              | class II aldolase/adducin family protein                      | class II aldolase/adducin family protein                      | FucA          | FCLPA                                                  |
| 411               | cbdbA1742                  | DET1642                  | DehaBAV1_1386             | VS1524                  | methionyl-tRNA formyltransferase                        | methionyl-tRNA formyltransferase( EC:2.1.2.9 )             | methionyl-tRNA formyltransferase                              | methionyl-tRNA formyltransferase                              | Fmt           | FMETTRS                                                |

| Model gene number | CBDB1 core metabolic genes | 195 core metabolic genes | BAV1 core metabolic genes | VS core metabolic genes | CBDB1 annotation                      | 195 annotation                        | BAV1 annotation                                                      | VS annotation                                                        | Model protein | Model reaction |
|-------------------|----------------------------|--------------------------|---------------------------|-------------------------|---------------------------------------|---------------------------------------|----------------------------------------------------------------------|----------------------------------------------------------------------|---------------|----------------|
| 412               | cbdbA331                   | DET0386                  | DehaBAV1_0366             | VS329                   | tetrapyrrole methylase family protein | tetrapyrrole methylase family protein | Uroporphyrin-III C/tetrapyrrole (Corrin/Porphyrin) methyltransferase | Uroporphyrin-III C/tetrapyrrole (Corrin/Porphyrin) methyltransferase | HemD          | UPP3MT, UPP3S  |
| 413               | cbdbA637                   | DET0687                  | DehaBAV1_0623             | VS591                   | conserved hypothetical protein        | conserved hypothetical protein        | conserved hypothetical protein                                       | conserved hypothetical protein                                       | CbiZ          | ADCOBHS        |

**Table 4. Gene Correspondence for Dispensable Genes Mapped to New Reactions of *i*AI549**

| Model gene number | CBDB1 dispensable metabolic genes | 195 dispensable metabolic genes | BAV1 dispensable metabolic genes | VS dispensable metabolic genes | CBDB1 annotation                                                     | 195 annotation                        | BAV1 annotation                         | VS annotation                                                        | Model protein | Model reaction                          |
|-------------------|-----------------------------------|---------------------------------|----------------------------------|--------------------------------|----------------------------------------------------------------------|---------------------------------------|-----------------------------------------|----------------------------------------------------------------------|---------------|-----------------------------------------|
| 414               | cbdbA155                          | No gene                         | DehaBAV1_0238                    | VS140                          | Ornithine cyclodeaminase( EC:4.3.1.12 )                              | No gene                               | Ornithine cyclodeaminase( EC:4.3.1.12 ) | Ornithine cyclodeaminase( EC:4.3.1.12 )                              | Ocd           | ORNCD                                   |
| 415               | cbdbA181                          | No gene                         | DehaBAV1_0218                    | VS161                          | Threonine aldolase( EC:4.1.2.5 )                                     | No gene                               | Threonine aldolase( EC:4.1.2.5 )        | Threonine aldolase( EC:4.1.2.5 )                                     | LtaA          | THRA, THRLAD                            |
| 416               | cbdbA247                          | DET0240                         | No gene                          | VS78                           | Uroporphyrin-III C/tetrapyrrole (Corrin/Porphyrin) methyltransferase | tetrapyrrole methylase family protein | No gene                                 | Uroporphyrin-III C/tetrapyrrole (Corrin/Porphyrin) methyltransferase | CbiE          | CPC6MT                                  |
| 417               | cbdbA257                          | DET0248                         | No gene                          | VS70                           | aminotransferase, class V( EC:2.8.1.7 )                              | cysteine desulfurase( EC:2.8.1.7 )    | No gene                                 | aminotransferase, class V( EC:2.8.1.7 )                              | IscS          | THZPSN                                  |
| 418               | cbdbA260                          | DET0297                         | No gene                          | No gene                        | Pyridoxamine 5-phosphate oxidase family {Dehalococcoides sp. CBDB1}  | hypothetical protein                  | No gene                                 | No gene                                                              | PdxHec        | PDX5PO                                  |
| 419               | cbdbA1077                         | No gene                         | DehaBAV1_0975                    | No gene                        | GCN5-related N-acetyltransferase                                     | No gene                               | GCN5-related N-acetyltransferase        | No gene                                                              | SucCD1        | SUCOAS                                  |
| 420               | cbdbA1338                         | No gene                         | DehaBAV1_1193                    | VS1164                         | L-aspartate oxidase( EC:1.4.3.16 )                                   | No gene                               | L-aspartate oxidase( EC:1.4.3.16 )      | L-aspartate oxidase( EC:1.4.3.16 )                                   | Frd, NadB     | ASPO1, ASPO3, ASPO4, ASPO5, ASPO6, FRD5 |
| 421               | cbdbA1527                         | DET1510                         | No gene                          | No gene                        | conserved hypothetical protein {Dehalococcoides sp. CBDB1}           | hypothetical protein                  | No gene                                 | No gene                                                              | ThiD          | PMPK                                    |



| Model gene number | CBDB1 dispensable metabolic genes | 195 dispensable metabolic genes | BAV1 dispensable metabolic genes | VS dispensable metabolic genes | CBDB1 annotation                                       | 195 annotation                                                                               | BAV1 annotation                                 | VS annotation                                   | Model protein | Model reaction |
|-------------------|-----------------------------------|---------------------------------|----------------------------------|--------------------------------|--------------------------------------------------------|----------------------------------------------------------------------------------------------|-------------------------------------------------|-------------------------------------------------|---------------|----------------|
| 422               | cbdbA1557                         | DET0089                         | No gene                          | No gene                        | radical SAM domain protein {Dehalococcoides sp. CBDB1} | radical SAM domain protein                                                                   | No gene                                         | No gene                                         | PflC          | PFLi, OBTFI    |
| 423               | No gene                           | DET0207                         | DehaBAV1_01_46                   | No gene                        | No gene                                                | phosphoheptose isomerase                                                                     | sugar isomerase (SIS)                           | No gene                                         | GmhA          | S7PI           |
| 424               | No gene                           | DET0202                         | DehaBAV1_01_51                   | VS190                          | No gene                                                | histidinol-phosphate phosphatase family protein/glycosyl transferase, group 2 family protein | histidinol-phosphate phosphatase family protein | histidinol-phosphate phosphatase family protein | HisJ          | HISTP          |

**Table 5. Gene Correspondence for Dispensable Genes Mapped to Reactions of *i*AI549 Already Present in Core**

| Model gene number | CBDB1 dispensable metabolic genes | 195 dispensable metabolic genes | BAV1 dispensable metabolic genes | VS dispensable metabolic genes | CBDB1 annotation                                                            | 195 annotation                                                   | BAV1 annotation                                        | VS annotation                                                        | Model protein | Model reaction             |
|-------------------|-----------------------------------|---------------------------------|----------------------------------|--------------------------------|-----------------------------------------------------------------------------|------------------------------------------------------------------|--------------------------------------------------------|----------------------------------------------------------------------|---------------|----------------------------|
| 425               | cbdbA80                           | DET1559                         | No gene                          | No gene                        | reductive dehalogenase homologous protein RdhA7 {Dehalococcoides sp. CBDB1} | reductive dehalogenase, putative                                 | No gene                                                | No gene                                                              | RdhA          | RDR1, RDR2                 |
| 426               | cbdbA84                           | No gene                         | No gene                          | VS1342                         | putative reductive dehalogenase                                             | No gene                                                          | No gene                                                | reductive dehalogenase                                               | RdhA          | RDR1, RDR2                 |
| 427               | cbdbA88                           | DET0311                         | DehaBAV1_0104                    | No gene                        | putative reductive dehalogenase                                             | reductive dehalogenase, putative                                 | reductive dehalogenase                                 | No gene                                                              | RdhA          | RDR1, RDR2                 |
| 428               | cbdbA251                          | DET0244                         | No gene                          | VS74                           | ribonucleoside-diphosphate reductase, adenosylcobalamin-dependent           | ribonucleotide reductase( EC:1.17.4.1 )                          | No gene                                                | ribonucleoside-diphosphate reductase, adenosylcobalamin-dependent    | NrdEF         | RNDR3, RNDR1, RNDR2, RNDR4 |
| 429               | cbdbA253                          | DET0245                         | No gene                          | VS73                           | ATP:corrinoid adenosyltransferase BtuR/CobO/CobP                            | cob(l)alamin adenosyltransferase ( EC:2.5.1.17 )                 | No gene                                                | ATP:corrinoid adenosyltransferase BtuR/CobO/CobP                     | CobA          | CBLATr, CYRDAAT, CBIAT     |
| 430               | cbdbA254                          | DET0246                         | No gene                          | VS72                           | cobalamin biosynthesis protein CobD                                         | cobalamin biosynthesis protein CobD                              | No gene                                                | cobalamin biosynthesis protein CobD                                  | CbiD          | ADCPS2, ADCOBAS            |
| 431               | cbdbA259                          | DET0250                         | No gene                          | VS68                           | precorrin-6y C5,15-methyltransferase (decarboxylating), CbiE subunit        | iron ABC transporter, periplasmic iron-binding protein, putative | No gene                                                | precorrin-6y C5,15-methyltransferase (decarboxylating), CbiE subunit | BtuF          | CBL1abc                    |
| 432               | cbdbA1034                         | No gene                         | DehaBAV1_0939                    | VS928                          | oligopeptide/dipeptide ABC transporter, ATPase subunit                      | No gene                                                          | oligopeptide/dipeptide ABC transporter, ATPase subunit | oligopeptide/dipeptide ABC transporter, ATPase subunit               | NikA          | Nlabc                      |

| Model gene number | CBDB1 dispensable metabolic genes | 195 dispensable metabolic genes | BAV1 dispensable metabolic genes | VS dispensable metabolic genes | CBDB1 annotation                                                     | 195 annotation                   | BAV1 annotation                                                      | VS annotation                                                        | Model protein | Model reaction          |
|-------------------|-----------------------------------|---------------------------------|----------------------------------|--------------------------------|----------------------------------------------------------------------|----------------------------------|----------------------------------------------------------------------|----------------------------------------------------------------------|---------------|-------------------------|
| 433               | cbdbA1036                         | No gene                         | DehaBAV1_0940                    | VS929                          | oligopeptide/dipeptide ABC transporter, ATPase subunit               | No gene                          | oligopeptide/dipeptide ABC transporter, ATPase subunit               | oligopeptide/dipeptide ABC transporter, ATPase subunit               | NikB          | Nlabc                   |
| 434               | cbdbA1037                         | No gene                         | DehaBAV1_0941                    | VS930                          | binding-protein-dependent transport systems inner membrane component | No gene                          | binding-protein-dependent transport systems inner membrane component | binding-protein-dependent transport systems inner membrane component | NikC          | Nlabc                   |
| 435               | cbdbA1038                         | No gene                         | DehaBAV1_0942                    | VS931                          | Nickel-transporting ATPase( EC:3.6.3.24 )                            | No gene                          | Nickel-transporting ATPase( EC:3.6.3.24 )                            | binding-protein-dependent transport systems inner membrane component | NikD          | Nlabc                   |
| 436               | cbdbA1039                         | No gene                         | DehaBAV1_0943                    | VS932                          | extracellular solute-binding protein, family 5                       | No gene                          | extracellular solute-binding protein, family 5                       | extracellular solute-binding protein, family 5                       | NikE          | Nlabc                   |
| 437               | cbdbA1160                         | No gene                         | DehaBAV1_1054                    | VS1026                         | arsenical-resistance protein                                         | No gene                          | arsenical-resistance protein                                         | arsenical-resistance protein                                         | ArsB2         | ANTIMt1, ARSNAt1, ARSt1 |
| 438               | cbdbA1163                         | No gene                         | DehaBAV1_1056                    | VS1028                         | Methionine sulfoxide reductase B                                     | No gene                          | Methionine sulfoxide reductase B                                     | methionine-R-sulfoxide reductase                                     | MsrA          | METSR-S2, METSR-S1      |
| 439               | cbdbA1453                         | DET1535                         | No gene                          | VS1427                         | putative reductive dehalogenase                                      | reductive dehalogenase, putative | No gene                                                              | reductive dehalogenase                                               | RdhA          | RDR1, RDR2              |
| 440               | cbdbA1454                         | No gene                         | No gene                          | VS1262                         | putative reductive dehalogenase anchoring protein                    | No gene                          | No gene                                                              | putative reductive dehalogenase anchoring protein                    | RdhB          | RDR1, RDR2              |
| 441               | cbdbA1455                         | No gene                         | No gene                          | VS1263                         | putative reductive dehalogenase                                      | No gene                          | No gene                                                              | reductive dehalogenase                                               | RdhA          | RDR1, RDR2              |

| Model gene number | CBDB1 dispensable metabolic genes | 195 dispensable metabolic genes | BAV1 dispensable metabolic genes | VS dispensable metabolic genes | CBDB1 annotation                                                               | 195 annotation                                     | BAV1 annotation        | VS annotation                                      | Model protein | Model reaction |
|-------------------|-----------------------------------|---------------------------------|----------------------------------|--------------------------------|--------------------------------------------------------------------------------|----------------------------------------------------|------------------------|----------------------------------------------------|---------------|----------------|
| 442               | cbdbA1490                         | DET1537                         | No gene                          | VS1429                         | reductive dehalogenase anchoring protein, putative {Dehalococcoides sp. CBDB1} | reductive dehalogenase anchoring protein, putative | No gene                | reductive dehalogenase anchoring protein, putative | RdhB          | RDR1, RDR2     |
| 443               | cbdbA1491                         | DET1538                         | No gene                          | VS1430                         | trichloroethene reductive dehalogenase {Dehalococcoides sp. CBDB1}             | reductive dehalogenase, putative                   | No gene                | reductive dehalogenase                             | RdhA          | RDR1, RDR2     |
| 444               | cbdbB33                           | DET0307                         | DehaBAV1_02_83                   | No gene                        | reductive dehalogenase anchoring protein, putative                             | reductive dehalogenase anchoring protein, putative | hypothetical protein   | No gene                                            | RdhB          | RDR1, RDR2     |
| 445               | cbdbA1495                         | DET0306                         | No gene                          | No gene                        | trichloroethene reductive dehalogenase {Dehalococcoides sp. CBDB1}             | reductive dehalogenase, putative                   | No gene                | No gene                                            | RdhA          | RDR1, RDR2     |
| 446               | cbdbA1507                         | DET0319                         | No gene                          | VS1392                         | putative reductive dehalogenase anchoring protein                              | reductive dehalogenase anchoring protein, putative | No gene                | reductive dehalogenase anchoring protein, putative | RdhB          | RDR1, RDR2     |
| 447               | cbdbA1536                         | No gene                         | No gene                          | VS1386                         | putative reductive dehalogenase anchoring protein                              | No gene                                            | No gene                | putative reductive dehalogenase anchoring protein  | RdhB          | RDR1, RDR2     |
| 448               | cbdbA1539                         | No gene                         | DehaBAV1_01_73                   | No gene                        | putative reductive dehalogenase                                                | No gene                                            | reductive dehalogenase | No gene                                            | RdhA          | RDR1, RDR2     |
| 449               | cbdbA1541                         | No gene                         | DehaBAV1_02_97                   | VS87                           | reductive dehalogenase anchoring protein, putative {Dehalococcoides sp. CBDB1} | No gene                                            | hypothetical protein   | putative reductive dehalogenase anchoring protein  | RdhB          | RDR1, RDR2     |

| Model gene number | CBDB1 dispensable metabolic genes | 195 dispensable metabolic genes | BAV1 dispensable metabolic genes | VS dispensable metabolic genes | CBDB1 annotation                                  | 195 annotation                                     | BAV1 annotation | VS annotation                                     | Model protein | Model reaction |
|-------------------|-----------------------------------|---------------------------------|----------------------------------|--------------------------------|---------------------------------------------------|----------------------------------------------------|-----------------|---------------------------------------------------|---------------|----------------|
| 450               | cbdbA1545                         | No gene                         | No gene                          | VS1363                         | putative reductive dehalogenase anchoring protein | No gene                                            | No gene         | putative reductive dehalogenase anchoring protein | RdhB          | RDR1, RDR2     |
| 451               | cbdbA1546                         | DET1519                         | No gene                          | VS1364                         | reductive dehalogenase                            | reductive dehalogenase, putative                   | No gene         | reductive dehalogenase                            | RdhA          | RDR1, RDR2     |
| 452               | cbdbA1549                         | DET1521                         | No gene                          | VS1377                         | putative reductive dehalogenase anchoring protein | reductive dehalogenase anchoring protein, putative | No gene         | putative reductive dehalogenase anchoring protein | RdhB          | RDR1, RDR2     |
| 453               | cbdbA1550                         | DET1522                         | No gene                          | VS1378                         | putative reductive dehalogenase                   | reductive dehalogenase, putative                   | No gene         | reductive dehalogenase                            | RdhA          | RDR1, RDR2     |
| 454               | cbdbA1568                         | No gene                         | No gene                          | VS1369                         | Glutamate--ammonia ligase( EC:6.3.1.2 )           | No gene                                            | No gene         | Glutamate--ammonia ligase( EC:6.3.1.2 )           | GlnA          | GLNS           |
| 455               | cbdbA1569                         | DET1521                         | No gene                          | VS1377                         | putative reductive dehalogenase anchoring protein | reductive dehalogenase anchoring protein, putative | No gene         | putative reductive dehalogenase anchoring protein | RdhB          | RDR1, RDR2     |
| 456               | cbdbA1570                         | DET1522                         | No gene                          | VS1378                         | putative reductive dehalogenase                   | reductive dehalogenase, putative                   | No gene         | reductive dehalogenase                            | RdhA          | RDR1, RDR2     |
| 457               | cbdbA1573                         | DET1518                         | No gene                          | VS1374                         | putative reductive dehalogenase anchoring protein | reductive dehalogenase anchoring protein, putative | No gene         | putative reductive dehalogenase anchoring protein | RdhB          | RDR1, RDR2     |
| 458               | cbdbA1575                         | DET1519                         | No gene                          | VS1375                         | putative reductive dehalogenase                   | reductive dehalogenase, putative                   | No gene         | reductive dehalogenase                            | RdhA          | RDR1, RDR2     |
| 459               | cbdbA1578                         | No gene                         | No gene                          | VS1383                         | putative reductive dehalogenase                   | No gene                                            | No gene         | reductive dehalogenase                            | RdhA          | RDR1, RDR2     |

| Model gene number | CBDB1 dispensable metabolic genes | 195 dispensable metabolic genes | BAV1 dispensable metabolic genes | VS dispensable metabolic genes | CBDB1 annotation                                                            | 195 annotation                                     | BAV1 annotation        | VS annotation                                      | Model protein | Model reaction |
|-------------------|-----------------------------------|---------------------------------|----------------------------------|--------------------------------|-----------------------------------------------------------------------------|----------------------------------------------------|------------------------|----------------------------------------------------|---------------|----------------|
| 460               | cbdbA1581                         | No gene                         | No gene                          | VS1386                         | putative reductive dehalogenase anchoring protein                           | No gene                                            | No gene                | putative reductive dehalogenase anchoring protein  | RdhB          | RDR1, RDR2     |
| 461               | cbdbA1582                         | No gene                         | DehaBAV1_0112                    | VS1387                         | reductive dehalogenase homologous protein RdhA9 {Dehalococcoides sp. CBDB1} | No gene                                            | reductive dehalogenase | reductive dehalogenase                             | RdhA          | RDR1, RDR2     |
| 462               | cbdbA1587                         | DET0319                         | No gene                          | VS1392                         | putative reductive dehalogenase anchoring protein                           | reductive dehalogenase anchoring protein, putative | No gene                | reductive dehalogenase anchoring protein, putative | RdhB          | RDR1, RDR2     |
| 463               | cbdbA1588                         | DET0318                         | No gene                          | VS1393                         | putative reductive dehalogenase                                             | reductive dehalogenase, putative                   | No gene                | reductive dehalogenase                             | RdhA          | RDR1, RDR2     |
| 464               | cbdbA1594                         | DET1534                         | No gene                          | VS1315                         | putative reductive dehalogenase anchoring protein                           | reductive dehalogenase anchoring protein, putative | No gene                | putative reductive dehalogenase anchoring protein  | RdhB          | RDR1, RDR2     |
| 465               | cbdbA1595                         | DET1535                         | No gene                          | VS1316                         | reductive dehalogenase                                                      | reductive dehalogenase, putative                   | No gene                | reductive dehalogenase                             | RdhA          | RDR1, RDR2     |
| 466               | cbdbA1597                         | No gene                         | No gene                          | VS1401                         | putative reductive dehalogenase anchoring protein                           | No gene                                            | No gene                | putative reductive dehalogenase anchoring protein  | RdhB          | RDR1, RDR2     |
| 467               | cbdbA1598                         | No gene                         | No gene                          | VS1402                         | putative reductive dehalogenase                                             | No gene                                            | No gene                | reductive dehalogenase                             | RdhA          | RDR1, RDR2     |

| Model gene number | CBDB1 dispensable metabolic genes | 195 dispensable metabolic genes | BAV1 dispensable metabolic genes | VS dispensable metabolic genes | CBDB1 annotation                                                                    | 195 annotation                                     | BAV1 annotation                     | VS annotation                                      | Model protein | Model reaction |
|-------------------|-----------------------------------|---------------------------------|----------------------------------|--------------------------------|-------------------------------------------------------------------------------------|----------------------------------------------------|-------------------------------------|----------------------------------------------------|---------------|----------------|
| 468               | cbdbA1617                         | No gene                         | No gene                          | VS1420                         | putative reductive dehalogenase anchoring protein                                   | No gene                                            | No gene                             | putative reductive dehalogenase anchoring protein  | RdhB          | RDR1, RDR2     |
| 469               | cbdbA1618                         | No gene                         | No gene                          | VS1421                         | putative reductive dehalogenase                                                     | No gene                                            | No gene                             | reductive dehalogenase                             | RdhA          | RDR1, RDR2     |
| 470               | cbdbA1623                         | No gene                         | DehaBAV1_0111                    | VS1426                         | putative reductive dehalogenase anchoring protein                                   | No gene                                            | hypothetical protein                | putative reductive dehalogenase anchoring protein  | RdhB          | RDR1, RDR2     |
| 471               | cbdbA1624                         | DET1535                         | No gene                          | VS1427                         | putative reductive dehalogenase                                                     | reductive dehalogenase, putative                   | No gene                             | reductive dehalogenase                             | RdhA          | RDR1, RDR2     |
| 472               | cbdbA1626                         | DET1537                         | No gene                          | VS1429                         | putative reductive dehalogenase anchoring protein                                   | reductive dehalogenase anchoring protein, putative | No gene                             | reductive dehalogenase anchoring protein, putative | RdhB          | RDR1, RDR2     |
| 473               | cbdbA1627                         | DET1538                         | No gene                          | VS1430                         | putative reductive dehalogenase                                                     | reductive dehalogenase, putative                   | No gene                             | reductive dehalogenase                             | RdhA          | RDR1, RDR2     |
| 474               | cbdbA1638                         | DET1545                         | No gene                          | VS1436                         | reductive dehalogenase homologous protein RdhA2 { <i>Dehalococcoides</i> sp. CBDB1} | reductive dehalogenase, putative                   | No gene                             | reductive dehalogenase                             | RdhA          | RDR1, RDR2     |
| 475               | cbdbA1667                         | No gene                         | DehaBAV1_1328                    | VS1458                         | NAD-dependent epimerase/dehydratase                                                 | No gene                                            | NAD-dependent epimerase/dehydratase |                                                    | GalE          | UDPG4E         |
| 476               | cbdbA1668                         | No gene                         | DehaBAV1_1329                    | VS1459                         | NAD-dependent epimerase/dehydratase                                                 | No gene                                            | NAD-dependent epimerase/dehydratase | NAD-dependent epimerase/dehydratase                | GalE          | UDPG4E         |

| Model gene number | CBDB1 dispensable metabolic genes | 195 dispensable metabolic genes | BAV1 dispensable metabolic genes | VS dispensable metabolic genes | CBDB1 annotation | 195 annotation                                                                                 | BAV1 annotation                                                     | VS annotation                                      | Model protein | Model reaction |
|-------------------|-----------------------------------|---------------------------------|----------------------------------|--------------------------------|------------------|------------------------------------------------------------------------------------------------|---------------------------------------------------------------------|----------------------------------------------------|---------------|----------------|
| 477               | No gene                           | DET0204                         | DehaBAV1_01_49                   | No gene                        | No gene          | NAD-dependent epimerase/dehydratase family protein                                             | NAD-dependent epimerase/dehydratase                                 |                                                    | GalE          | UDPG4E         |
| 478               | No gene                           | DET0079                         | DehaBAV1_08_47                   | VS1291                         | No gene          | trichloroethene reductive dehalogenase                                                         | reductive dehalogenase                                              | reductive dehalogenase                             | RdhA          | RDR1, RDR2     |
| 479               | No gene                           | DET0312                         | DehaBAV1_01_03                   | No gene                        | No gene          | reductive dehalogenase anchoring protein, putative                                             | hypothetical protein                                                | No gene                                            | RdhB          | RDR1, RDR2     |
| 480               | No gene                           | DET0296                         | DehaBAV1_02_98                   | No gene                        | No gene          | precorrin-6Y C5,15-methyltransferase, putative                                                 | hypothetical protein                                                | No gene                                            | BtuF          | CBL1abc        |
| 481               | No gene                           | DET0205                         | DehaBAV1_01_48                   | No gene                        | No gene          | D-glycero-D-mannoheptose 1-phosphate guanosyltransferase                                       | Nucleotidyl transferase                                             | No gene                                            | Mpg, GlgC     | MAN1PT1, GLGC  |
| 482               | No gene                           |                                 | DehaBAV1_02_77                   | VS103                          | No gene          | No gene                                                                                        | hypothetical protein                                                | reductive dehalogenase anchoring protein, putative | RdhB          | RDR1, RDR2     |
| 483               | No gene                           | DET0214                         | DehaBAV1_01_39                   | No gene                        | No gene          | iron-sulfur cluster-binding protein/coenzyme F420-reducing hydrogenase, beta subunit, putative | coenzyme F420 hydrogenase/dehydrogenase beta subunit domain protein | No gene                                            | FrdH          | FRHD           |
| 484               | No gene                           |                                 | DehaBAV1_02_76                   | VS104                          | No gene          | No gene                                                                                        | reductive dehalogenase                                              | reductive dehalogenase                             | RdhA          | RDR1, RDR2     |
| 485               | No gene                           |                                 | DehaBAV1_02_81                   | VS99                           | No gene          | No gene                                                                                        | reductive dehalogenase                                              | reductive dehalogenase                             | RdhA          | RDR1, RDR2     |
| 486               | No gene                           |                                 | DehaBAV1_02_84                   | VS96                           | No gene          | No gene                                                                                        | reductive dehalogenase                                              | reductive dehalogenase                             | RdhA          | RDR1, RDR2     |



| Model gene number | CBDB1 dispensable metabolic genes | 195 dispensable metabolic genes | BAV1 dispensable metabolic genes | VS dispensable metabolic genes | CBDB1 annotation | 195 annotation                      | BAV1 annotation                                       | VS annotation          | Model protein | Model reaction |
|-------------------|-----------------------------------|---------------------------------|----------------------------------|--------------------------------|------------------|-------------------------------------|-------------------------------------------------------|------------------------|---------------|----------------|
| 487               | No gene                           |                                 | DehaBAV1_0296                    | VS88                           | No gene          | No gene                             | reductive dehalogenase                                | reductive dehalogenase | RdhA          | RDR1, RDR2     |
| 488               | No gene                           | DET1565                         | DehaBAV1_1310                    | No gene                        | No gene          | iron-sulfur cluster-binding protein | 4Fe-4S ferredoxin, iron-sulfur binding domain protein | No gene                | Fdx           | FRHD           |

**Table 6. Gene Correspondence for Unique Genes Mapped to New Reactions of *i*AI549**

| Model gene number | CBDB1 unique metabolic genes | 195 unique metabolic genes | BAV1 unique metabolic genes | VS unique metabolic genes | CBDB1 annotation | 195 annotation                                                   | BAV1 annotation | VS annotation | Model protein | Model reaction |
|-------------------|------------------------------|----------------------------|-----------------------------|---------------------------|------------------|------------------------------------------------------------------|-----------------|---------------|---------------|----------------|
| 489               | No gene                      | DET1150                    | No gene                     | No gene                   | No gene          | nitrogenase                                                      | No gene         | No gene       | Nif           | NITr           |
| 490               | No gene                      | DET1151                    | No gene                     | No gene                   | No gene          | dinitrogenase iron-molybdenum cofactor NifB/Y/X family protein   | No gene         | No gene       | Nif           | NITr           |
| 491               | No gene                      | DET1152                    | No gene                     | No gene                   | No gene          | nitrogenase molybdenum-iron protein, beta subunit, putative      | No gene         | No gene       | Nif           | NITr           |
| 492               | No gene                      | DET1153                    | No gene                     | No gene                   | No gene          | nitrogenase MoFe cofactor biosynthesis protein NifE              | No gene         | No gene       | Nif           | NITr           |
| 493               | No gene                      | DET1154                    | No gene                     | No gene                   | No gene          | nitrogenase molybdenum-iron protein, beta subunit( EC:1.18.6.1 ) | No gene         | No gene       | Nif           | NITr           |
| 494               | No gene                      | DET1155                    | No gene                     | No gene                   | No gene          | nitrogenase molybdenum-iron protein alpha chain( EC:1.18.6.1 )   | No gene         | No gene       | Nif           | NITr           |
| 495               | No gene                      | DET1158                    | No gene                     | No gene                   | No gene          | nitrogenase iron protein( EC:1.18.6.1 )                          | No gene         | No gene       | Nif           | NITr           |
| 496               | No gene                      | DET1159                    | No gene                     | No gene                   | No gene          | molybdenum ABC transporter, ATP-binding protein                  | No gene         | No gene       | ModABCE       | MOBDabc        |

| Model gene number | CBDB1 unique metabolic genes | 195 unique metabolic genes | BAV1 unique metabolic genes | VS unique metabolic genes | CBDB1 annotation | 195 annotation                                                    | BAV1 annotation | VS annotation | Model protein | Model reaction |
|-------------------|------------------------------|----------------------------|-----------------------------|---------------------------|------------------|-------------------------------------------------------------------|-----------------|---------------|---------------|----------------|
| 497               | No gene                      | DET1160                    | No gene                     | No gene                   | No gene          | molybdenum ABC transporter, permease protein                      | No gene         | No gene       | ModABCE       | MOBDabc        |
| 498               | No gene                      | DET1161                    | No gene                     | No gene                   | No gene          | molybdenum ABC transporter, periplasmic molybdate-binding protein | No gene         | No gene       | ModABCE       | MOBDabc        |

**Table 7. Gene Correspondence for Unique Genes Mapped to Reactions of *i*AI549 Already Present in Core**

| Model gene number | CBDB1 unique metabolic genes | 195 unique metabolic genes | BAV1 unique metabolic genes | VS unique metabolic genes | CBDB1 annotation                                        | 195 annotation | BAV1 annotation | VS annotation | Model protein | Model reaction |
|-------------------|------------------------------|----------------------------|-----------------------------|---------------------------|---------------------------------------------------------|----------------|-----------------|---------------|---------------|----------------|
| 499               | cbdbA85                      | No gene                    | No gene                     | No gene                   | putative reductive dehalogenase anchoring protein       | No gene        | No gene         | No gene       | RdhB          | RDR1, RDR2     |
| 500               | cbdbA1195                    | No gene                    | No gene                     | No gene                   | putative deoxyguanosinetriphosphate triphosphohydrolase | No gene        | No gene         | No gene       | Dgt           | NTPTP2, DGTPH  |
| 501               | cbdbA1452                    | No gene                    | No gene                     | No gene                   | putative reductive dehalogenase anchoring protein       | No gene        | No gene         | No gene       | RdhB          | RDR1, RDR2     |
| 502               | cbdbA1502                    | No gene                    | No gene                     | No gene                   | putative reductive dehalogenase anchoring protein       | No gene        | No gene         | No gene       | RdhB          | RDR1, RDR2     |
| 503               | cbdbA1503                    | No gene                    | No gene                     | No gene                   | putative reductive dehalogenase                         | No gene        | No gene         | No gene       | RdhA          | RDR1, RDR2     |
| 504               | cbdbA1508                    | No gene                    | No gene                     | No gene                   | putative reductive dehalogenase                         | No gene        | No gene         | No gene       | RdhA          | RDR1, RDR2     |
| 505               | cbdbA1535                    | No gene                    | No gene                     | No gene                   | putative reductive dehalogenase                         | No gene        | No gene         | No gene       | RdhA          | RDR1, RDR2     |
| 506               | cbdbA1540                    | No gene                    | No gene                     | No gene                   | reductive dehalogenase-homologous N-terminal fragment   | No gene        | No gene         | No gene       | RdhA          | RDR1, RDR2     |
| 507               | cbdbA1542                    | No gene                    | No gene                     | No gene                   | putative reductive dehalogenase                         | No gene        | No gene         | No gene       | RdhA          | RDR1, RDR2     |
| 508               | cbdbA1559                    | No gene                    | No gene                     | No gene                   | putative reductive dehalogenase anchoring protein       | No gene        | No gene         | No gene       | RdhB          | RDR1, RDR2     |
| 509               | cbdbA1560                    | No gene                    | No gene                     | No gene                   | putative reductive dehalogenase                         | No gene        | No gene         | No gene       | RdhA          | RDR1, RDR2     |

| Model gene number | CBDB1 unique metabolic genes | 195 unique metabolic genes | BAV1 unique metabolic genes | VS unique metabolic genes | CBDB1 annotation                                  | 195 annotation                                                     | BAV1 annotation | VS annotation | Model protein | Model reaction |
|-------------------|------------------------------|----------------------------|-----------------------------|---------------------------|---------------------------------------------------|--------------------------------------------------------------------|-----------------|---------------|---------------|----------------|
| 510               | cbdbA1562                    | No gene                    | No gene                     | No gene                   | putative reductive dehalogenase anchoring protein | No gene                                                            | No gene         | No gene       | RdhB          | RDR1, RDR2     |
| 511               | cbdbA1563                    | No gene                    | No gene                     | No gene                   | putative reductive dehalogenase                   | No gene                                                            | No gene         | No gene       | RdhA          | RDR1, RDR2     |
| 512               | cbdbA1577                    | No gene                    | No gene                     | No gene                   | putative reductive dehalogenase anchoring protein | No gene                                                            | No gene         | No gene       | RdhB          | RDR1, RDR2     |
| 513               | No gene                      | DET0088                    | No gene                     | No gene                   | No gene                                           | reductive dehalogenase domain protein                              | No gene         | No gene       | RdhA          | RDR1, RDR2     |
| 514               | No gene                      | DET0173                    | No gene                     | No gene                   | No gene                                           | reductive dehalogenase, putative                                   | No gene         | No gene       | RdhA          | RDR1, RDR2     |
| 515               | No gene                      | DET0078                    | No gene                     | No gene                   | No gene                                           | trichloroethene reductive dehalogenase anchoring protein, putative | No gene         | No gene       | RdhB          | RDR1, RDR2     |
| 516               | No gene                      | DET0876                    | No gene                     | No gene                   | No gene                                           | reductive dehalogenase, putative                                   | No gene         | No gene       | RdhA          | RDR1, RDR2     |
| 517               | No gene                      | DET1528                    | No gene                     | No gene                   | No gene                                           | reductive dehalogenase, putative                                   | No gene         | No gene       | RdhA          | RDR1, RDR2     |
| 518               | No gene                      | DET0163                    | No gene                     | No gene                   | No gene                                           | reductive dehalogenase anchoring protein, putative                 | No gene         | No gene       | RdhB          | RDR1, RDR2     |
| 519               | No gene                      | DET0175                    | No gene                     | No gene                   | No gene                                           | reductive dehalogenase anchoring protein, putative                 | No gene         | No gene       | RdhB          | RDR1, RDR2     |

| Model gene number | CBDB1 unique metabolic genes | 195 unique metabolic genes | BAV1 unique metabolic genes | VS unique metabolic genes | CBDB1 annotation | 195 annotation                                             | BAV1 annotation      | VS annotation          | Model protein | Model reaction |
|-------------------|------------------------------|----------------------------|-----------------------------|---------------------------|------------------|------------------------------------------------------------|----------------------|------------------------|---------------|----------------|
| 520               | No gene                      | DET0236                    | No gene                     | No gene                   | No gene          | reductive dehalogenase anchoring protein, putative         | No gene              | No gene                | RdhB          | RDR1, RDR2     |
| 521               | No gene                      | DET0875                    | No gene                     | No gene                   | No gene          | reductive dehalogenase anchoring protein, putative         | No gene              | No gene                | RdhB          | RDR1, RDR2     |
| 522               | No gene                      | DET1527                    | No gene                     | No gene                   | No gene          | reductive dehalogenase anchoring protein, putative         | No gene              | No gene                | RdhB          | RDR1, RDR2     |
| 523               | No gene                      | DET1558                    | No gene                     | No gene                   | No gene          | reductive dehalogenase anchoring protein, putative         | No gene              | No gene                | RdhB          | RDR1, RDR2     |
| 524               | No gene                      | DET1174                    | No gene                     | No gene                   | No gene          | Fec-type ABC transporter, periplasmic iron-binding protein | No gene              | No gene                | BtuF          | CBL1abc        |
| 525               | No gene                      | DET1175                    | No gene                     | No gene                   | No gene          | Fec-type ABC transporter, permease protein                 | No gene              | No gene                | BtuC          | CBL1abc        |
| 526               | No gene                      | DET1176                    | No gene                     | No gene                   | No gene          | Fec-type ABC transporter, ATP-binding protein              | No gene              | No gene                | BtuD          | CBL1abc        |
| 527               | No gene                      | No gene                    | DehaBAV1_0118               | No gene                   | No gene          | No gene                                                    | hypothetical protein | No gene                | RdhB          | RDR1, RDR2     |
| 528               | No gene                      | No gene                    | No gene                     | VS1260                    | No gene          | No gene                                                    | No gene              | reductive dehalogenase | RdhA          | RDR1, RDR2     |
| 529               | No gene                      | No gene                    | No gene                     | VS1349                    | No gene          | No gene                                                    | No gene              | reductive dehalogenase | RdhA          | RDR1, RDR2     |

| Model gene number | CBDB1 unique metabolic genes | 195 unique metabolic genes | BAV1 unique metabolic genes | VS unique metabolic genes | CBDB1 annotation | 195 annotation | BAV1 annotation | VS annotation                                     | Model protein | Model reaction |
|-------------------|------------------------------|----------------------------|-----------------------------|---------------------------|------------------|----------------|-----------------|---------------------------------------------------|---------------|----------------|
| 530               | No gene                      | No gene                    | No gene                     | VS1344                    | No gene          | No gene        | No gene         | reductive dehalogenase                            | RdhA          | RDR1, RDR2     |
| 531               | No gene                      | No gene                    | No gene                     | VS1340                    | No gene          | No gene        | No gene         | reductive dehalogenase                            | RdhA          | RDR1, RDR2     |
| 532               | No gene                      | No gene                    | No gene                     | VS1329                    | No gene          | No gene        | No gene         | reductive dehalogenase                            | RdhA          | RDR1, RDR2     |
| 533               | No gene                      | No gene                    | No gene                     | VS1327                    | No gene          | No gene        | No gene         | reductive dehalogenase                            | RdhA          | RDR1, RDR2     |
| 534               | No gene                      | No gene                    | No gene                     | VS1320                    | No gene          | No gene        | No gene         | reductive dehalogenase                            | RdhA          | RDR1, RDR2     |
| 535               | No gene                      | No gene                    | No gene                     | VS1314                    | No gene          | No gene        | No gene         | reductive dehalogenase                            | RdhA          | RDR1, RDR2     |
| 536               | No gene                      | No gene                    | No gene                     | VS82                      | No gene          | No gene        | No gene         | reductive dehalogenase                            | RdhA          | RDR1, RDR2     |
| 537               | No gene                      | No gene                    | No gene                     | VS1261                    | No gene          | No gene        | No gene         | putative reductive dehalogenase                   | RdhA          | RDR1, RDR2     |
| 538               | No gene                      | No gene                    | No gene                     | VS1382                    | No gene          | No gene        | No gene         | putative reductive dehalogenase anchoring protein | RdhB          | RDR1, RDR2     |
| 539               | No gene                      | No gene                    | No gene                     | VS1370                    | No gene          | No gene        | No gene         | putative reductive dehalogenase anchoring protein | RdhB          | RDR1, RDR2     |

| Model gene number | CBDB1 unique metabolic genes | 195 unique metabolic genes | BAV1 unique metabolic genes | VS unique metabolic genes | CBDB1 annotation | 195 annotation | BAV1 annotation | VS annotation                                     | Model protein | Model reaction |
|-------------------|------------------------------|----------------------------|-----------------------------|---------------------------|------------------|----------------|-----------------|---------------------------------------------------|---------------|----------------|
| 540               | No gene                      | No gene                    | No gene                     | VS1341                    | No gene          | No gene        | No gene         | putative reductive dehalogenase anchoring protein | RdhB          | RDR1, RDR2     |
| 541               | No gene                      | No gene                    | No gene                     | VS1339                    | No gene          | No gene        | No gene         | putative reductive dehalogenase anchoring protein | RdhB          | RDR1, RDR2     |
| 542               | No gene                      | No gene                    | No gene                     | VS1334                    | No gene          | No gene        | No gene         | putative reductive dehalogenase anchoring protein | RdhB          | RDR1, RDR2     |
| 543               | No gene                      | No gene                    | No gene                     | VS1328                    | No gene          | No gene        | No gene         | putative reductive dehalogenase anchoring protein | RdhB          | RDR1, RDR2     |
| 544               | No gene                      | No gene                    | No gene                     | VS1326                    | No gene          | No gene        | No gene         | putative reductive dehalogenase anchoring protein | RdhB          | RDR1, RDR2     |
| 545               | No gene                      | No gene                    | No gene                     | VS1323                    | No gene          | No gene        | No gene         | putative reductive dehalogenase anchoring protein | RdhB          | RDR1, RDR2     |
| 546               | No gene                      | No gene                    | No gene                     | VS1319                    | No gene          | No gene        | No gene         | putative reductive dehalogenase anchoring protein | RdhB          | RDR1, RDR2     |



| Model gene number | CBDB1 unique metabolic genes | 195 unique metabolic genes | BAV1 unique metabolic genes | VS unique metabolic genes | CBDB1 annotation | 195 annotation | BAV1 annotation | VS annotation                                     | Model protein | Model reaction |
|-------------------|------------------------------|----------------------------|-----------------------------|---------------------------|------------------|----------------|-----------------|---------------------------------------------------|---------------|----------------|
| 547               | No gene                      | No gene                    | No gene                     | VS1313                    | No gene          | No gene        | No gene         | putative reductive dehalogenase anchoring protein | RdhB          | RDR1, RDR2     |
| 548               | No gene                      | No gene                    | No gene                     | VS1307                    | No gene          | No gene        | No gene         | putative reductive dehalogenase anchoring protein | RdhB          | RDR1, RDR2     |
| 549               | No gene                      | No gene                    | No gene                     | VS81                      | No gene          | No gene        | No gene         | putative reductive dehalogenase anchoring protein | RdhB          | RDR1, RDR2     |

**Table 8. Detailed List of Proteins of *i*AI549**

| No | Abbreviation | Full Name                                    | Model gene number | Reaction                            |
|----|--------------|----------------------------------------------|-------------------|-------------------------------------|
| 1  | AccC         | acetyl-CoA carboxylase, biotin carboxylase   | 24+25             | ACCOAC                              |
| 2  | Aco3         | aconitate hydratase                          | 219+218+94+93     | MICITH, ACONT                       |
| 3  | AcpS         | holo-[acyl-carrier-protein] synthase         | 90                | ACPS1                               |
| 4  | Acs          | acetyl-CoA synthetase                        | 323               | ACS                                 |
| 5  | AdeC         | adenine deaminase                            | 208               | ADD                                 |
| 6  | AdhC         | Alcohol dehydrogenase                        | 15, 27            | ALCD19, ALCD2x, ALCD3               |
| 7  | Adk          | adenylate kinase                             | 111               | DADK, ADNK1, ADK1, ADK2, ADK4, ADK3 |
| 8  | AgaZ         | tagatose 6-phosphate aldolase I              | 354               | TGBPA                               |
| 9  | AhcY         | adenosylhomocysteinase                       | 116               | AHC                                 |
| 10 | AlaS         | alanyl-tRNA synthetase                       | 14                | ALATRS                              |
| 11 | AlaT         | alanine transaminase                         | 351               | ALATA_L                             |
| 12 | AldH         | Aldehyde dehydrogenase                       | 342               | ALDD8b                              |
| 13 | AmtB         | Ammonium transporter                         | 291               | NH4t, NH4t3                         |
| 14 | Apt          | adenine phosphoribosyltransferase            | 311               | ADPT                                |
| 15 | ArgA         | N-acetylglutamate synthase                   | 119, 100          | ACGS                                |
| 16 | ArgB1        | Acetylglutamate kinase                       | 332               | ACGK                                |
| 17 | ArgC         | N-acetyl-g-glutamyl-phosphate reductase      | 405               | AGPR                                |
| 18 | ArgD         | N-acetylornithine aminotransferase           | 333               | SDPTA, ACOTA                        |
| 19 | ArgF         | ornithine carbamoyltransferase               | 362               | OCBT                                |
| 20 | ArgG         | argininosuccinate synthase                   | 334               | ARGSS                               |
| 21 | ArgH         | argininosuccinate lyase                      | 335               | ARGSL                               |
| 22 | ArgJ         | ornithine transacetylase                     | 331               | ORNTAC, ACGS                        |
| 23 | ArgS         | Arginyl-tRNA synthetase                      | 337               | ARGTRS                              |
| 24 | AroA         | 3-phosphoshikimate 1-carboxyvinyltransferase | 105               | PSCVT                               |
| 25 | AroA2        | phospho-2-dehydro-3-deoxyheptonate aldolase  | 378               | DAHPS                               |
| 26 | AroB         | 3-dehydroquinate synthase                    | 109, 72           | DHQS                                |
| 27 | AroC1        | Chorismate synthase                          | 104               | CHORS                               |
| 28 | AroD1        | 3-dehydroquinate dehydratase                 | 108               | DHQD                                |
| 29 | AroE1        | Shikimate 5-dehydrogenase                    | 107               | SHK3D                               |
| 30 | AroG         | phospho-2-dehydro-3-deoxyheptonate aldolase  | 110               | DAHPS                               |
| 31 | AroK         | shikimate kinase                             | 106               | SHKK                                |
| 32 | ArsB         | Arsenical pump membrane protein              | 248               | ARSt1                               |

| No | Abbreviation | Full Name                                                  | Model gene number                                                                                                                                                                                                                                         | Reaction                |
|----|--------------|------------------------------------------------------------|-----------------------------------------------------------------------------------------------------------------------------------------------------------------------------------------------------------------------------------------------------------|-------------------------|
| 33 | ArsB2        | Arsenical pump membrane protein                            | 437                                                                                                                                                                                                                                                       | ANTIMt1, ARSNAt1, ARSt1 |
| 34 | Asd          | aspartate-semialdehyde dehydrogenase                       | 276                                                                                                                                                                                                                                                       | ASAD                    |
| 35 | AsnA         | asparagine synthetase A                                    | 42                                                                                                                                                                                                                                                        | ASNS2                   |
| 36 | AspA         | aspartate ammonia-lyase                                    | 335                                                                                                                                                                                                                                                       | ASPT                    |
| 37 | AspC         | aspartate aminotransferase                                 | 139, 351, 190                                                                                                                                                                                                                                             | ASPTA1                  |
| 38 | AspK         | Aspartate Kinase                                           | 407                                                                                                                                                                                                                                                       | ASPK                    |
| 39 | AspS         | Aspartyl-tRNA synthetase                                   | 177                                                                                                                                                                                                                                                       | ASPTRS                  |
| 40 | AtpABCDEFGH  | ATP synthase                                               | 136+137+135+133+132+130+134+131                                                                                                                                                                                                                           | ATPS3r                  |
| 41 | AzlCD        | branched-chain amino acid transporter                      | 265+266+263+264+267                                                                                                                                                                                                                                       | ILEabc, VALabc, LEUabc  |
| 42 | BioA         | adenosylmethionine-8-amino-7-oxononanoate aminotransferase | 333                                                                                                                                                                                                                                                       | AMAOT                   |
| 43 | BioBec       | Biotin synthase                                            | 306                                                                                                                                                                                                                                                       | BTS                     |
| 44 | BirA         | Biotin protein ligase                                      | 235                                                                                                                                                                                                                                                       | BACCL                   |
| 45 | BraB         | branched-chain amino acid transporter                      | 261                                                                                                                                                                                                                                                       | ILEabc, LEUabc, VALabc  |
| 46 | BtuC         | ABC vitamin B12 transporter (membrane)                     | 525, 162                                                                                                                                                                                                                                                  | CBL1abc                 |
| 47 | BtuD         | ABC vitamin B12 transporter (atp_bind)                     | 526, 163                                                                                                                                                                                                                                                  | CBL1abc                 |
| 48 | BtuF         | ABC vitamin B12 transporter (peri_bind)                    | 431, 524, 161, 480                                                                                                                                                                                                                                        | CBL1abc                 |
| 49 | CarAB        | carbamoyl-phosphate synthase                               | 317+316                                                                                                                                                                                                                                                   | CBPSr                   |
| 50 | CbiB         | Adenosyl cobinamide synthase                               | 164                                                                                                                                                                                                                                                       | ADCPS2, ADCOBAS         |
| 51 | CbiD         | Cobalamin biosynthetic protein CbiD                        | 430, 300                                                                                                                                                                                                                                                  | ADCOBAS, ADCPS2         |
| 52 | CbiE         | precorrin-6Y C5,15-methyltransferase                       | 416                                                                                                                                                                                                                                                       | CPC6MT                  |
| 53 | CbiZ         | Adenosylcobinamide hydrolase                               | 413                                                                                                                                                                                                                                                       | ADCOBHS                 |
| 54 | RdhA         | Reductive dehalogenase                                     | 537, 453, 51, 507, 304, 467, 514, 458, 443, 463, 535, 509, 532, 484, 486, 49, 469, 487, 505, 531, 534, 448, 511, 474, 461, 529, 427, 517, 471, 465, 40, 536, 425, 473, 478, 441, 533, 426, 445, 528, 516, 19, 439, 451, 513, 485, 530, 459, 456, 504, 503 | RDR1, RDR2              |

| No | Abbreviation | Full Name                                                                     | Model gene number                                                                                                                                                                                                                                      | Reaction               |
|----|--------------|-------------------------------------------------------------------------------|--------------------------------------------------------------------------------------------------------------------------------------------------------------------------------------------------------------------------------------------------------|------------------------|
| 55 | RdhB         | Reductive dehalogenase anchoring protein                                      | 519, 472, 527, 447, 523, 539, 499, 449, 506, 470, 468, 547, 452, 544, 538, 501, 540, 464, 50, 450, 520, 518, 440, 512, 522, 546, 442, 460, 444, 446, 482, 466, 508, 457, 462, 541, 542, 548, 549, 388, 41, 502, 521, 543, 545, 479, 515, 305, 510, 455 | RDR1, RDR2             |
| 56 | CdsA         | phosphatidate cytidyltransferase                                              | 59                                                                                                                                                                                                                                                     | PHCYT                  |
| 57 | CimA         | Citramalate synthase                                                          | 216                                                                                                                                                                                                                                                    | CITRMS                 |
| 58 | Cls          | cardiolipin synthetase                                                        | 279                                                                                                                                                                                                                                                    | CLPNS                  |
| 59 | Cmk          | cytidylate kinase                                                             | 105                                                                                                                                                                                                                                                    | CYTK2, CYTK1, UMPK     |
| 60 | CoaA         | pantothenate kinase                                                           | 83                                                                                                                                                                                                                                                     | PNTK                   |
| 61 | CoaD         | pantetheine-phosphate adenyltransferase                                       | 43                                                                                                                                                                                                                                                     | PTPAT                  |
| 62 | CoaE         | dephospho-CoA kinase                                                          | 345                                                                                                                                                                                                                                                    | DPCOAK                 |
| 63 | CobA         | cob(I)alamin adenosyltransferase                                              | 326, 301, 429                                                                                                                                                                                                                                          | CBIAT, CYRDAAT, CBLATr |
| 64 | CobB         | cobyrinic acid a,c-diamide synthase                                           | 29                                                                                                                                                                                                                                                     | CYRDAS                 |
| 65 | CobC         | alpha-ribazole-5-phosphatase                                                  | 168                                                                                                                                                                                                                                                    | RBZP                   |
| 66 | CobQ         | cobyric acid synthase                                                         | 260                                                                                                                                                                                                                                                    | CPC3MT, ADCOBHEXS      |
| 67 | CobQ-CobD    | cobyric acid synthase/L-threonine-O-3-phosphate decarboxylase                 | 165                                                                                                                                                                                                                                                    | THRPD                  |
| 68 | CobS         | cobalamin 5'-phosphate synthase                                               | 167                                                                                                                                                                                                                                                    | COBPS, COBPS2          |
| 69 | CobT         | nicotinate-nucleotide--dimethylbenzimidazole phosphoribosyltransferase (cobT) | 166                                                                                                                                                                                                                                                    | NNDMBRT3, NNDMBRT      |
| 70 | CobU         | cobinamide kinase/cobinamide phosphate guanylyltransferase                    | 169                                                                                                                                                                                                                                                    | ACBIPGT, ADCOBAK       |
| 71 | ComEB        | dCMP deaminase                                                                | 76                                                                                                                                                                                                                                                     | DCMPDA2ir, DCMPDA3ir   |
| 72 | CooS         | carbon monoxide dehydrogenase                                                 | 171, 172, 170, 174                                                                                                                                                                                                                                     | CODHr                  |
| 73 | CorA1        | Magnesium and cobalt transport protein CorA                                   | 82, 142                                                                                                                                                                                                                                                | MGt5, COBALt5          |
| 74 | Cudp         | copper translocating ATPase                                                   | 271                                                                                                                                                                                                                                                    | Cuabc                  |
| 75 | CyaA         | Adenylate cyclase                                                             | 152                                                                                                                                                                                                                                                    | ADNCYC                 |
| 76 | CysAP        | Sulfate transport ATP-binding protein cysA                                    | 213                                                                                                                                                                                                                                                    | TSULabc, SULabc        |
| 77 | CysE         | serine acetyltransferase                                                      | 398                                                                                                                                                                                                                                                    | SERAT                  |
| 78 | CysH         | phosphoadenylyl-sulfate reductase                                             | 343, 283, 282, 237                                                                                                                                                                                                                                     | SADT2                  |
| 79 | CysKec       | Cysteine synthase A                                                           | 299                                                                                                                                                                                                                                                    | CYSS                   |

| No  | Abbreviation | Full Name                                                | Model gene number | Reaction                                                                               |
|-----|--------------|----------------------------------------------------------|-------------------|----------------------------------------------------------------------------------------|
| 80  | CysS         | cysteinyl-tRNA synthetase                                | 18                | CYSTRS                                                                                 |
| 81  | DapA         | dihydrodipicolinate synthase                             | 277               | DHDPS                                                                                  |
| 82  | DapAT        | diaminopimelate aminotransferase                         | 190               | DAPAT                                                                                  |
| 83  | DapB         | dihydrodipicolinate reductase                            | 275               | DHDPRy                                                                                 |
| 84  | DapD         | tetrahydrodipicolinate succinylase                       | 121               | THDPS                                                                                  |
| 85  | DapE         | succinyl-diaminopimelate desuccinylase                   | 127, 198          | SDPDS                                                                                  |
| 86  | DapF         | diaminopimelate epimerase                                | 191               | DAPE                                                                                   |
| 87  | Ddl          | D-alanyl-D-alanine ligase                                | 154               | ALAALA                                                                                 |
| 88  | Def          | polypeptide deformylase                                  | 199               | FMETDF                                                                                 |
| 89  | Dfp          | phosphopantothenoylecysteine decarboxylase               | 84                | PPCDC, PPNCL                                                                           |
| 90  | DfrA         | dihydrofolate reductase                                  | 214               | DHFOR2, DHFOR3, DHFR                                                                   |
| 91  | DgkA         | Diacylglycerol kinase                                    | 77                | DAGK                                                                                   |
| 92  | Dgt          | dGTPase                                                  | 128, 500          | NTPTP2, DGTPH                                                                          |
| 93  | Dutec        | dUTP pyrophosphatase                                     | 78                | DUTPDP                                                                                 |
| 94  | Dxr          | 1-deoxy-D-xylulose-5-phosphate reductoisomerase          | 58                | DXPRI                                                                                  |
| 95  | Dxs          | 1-deoxyxylulose-5-phosphate synthase                     | 195               | DXPS                                                                                   |
| 96  | Eno          | enolase                                                  | 144               | ENO                                                                                    |
| 97  | Epd          | D-erythrose 4-phosphate dehydrogenase                    | 143               | E4PD                                                                                   |
| 98  | FabD         | malonyl CoA-acyl carrier protein transacylase            | 339               | MACPMT                                                                                 |
| 99  | FabF         | beta-ketoacyl-acyl carrier protein synthase II           | 274               | MCMAT8, MCMAT6, MCMAT4, MCMAT5, MCMAT2, MCMAT7, MCMAT9, AACPAT, ACMAT1, MCMAT3         |
| 100 | FabG1        | 3-oxoacyl-[acyl-carrier-protein] reductase               | 340, 189          | HOCR3, HDER4, HDDR5, HTDR6, HBUR1, HHDR7, HICR9, HODR8_#1, HHYR2                       |
| 101 | FabI         | enoyl-(acyl-carrier-protein) reductase                   | 338               | KAS17, DEMAT4, OCMAT3, OCDMAT8, DDMAT5, HDMAT7, ICSMAT9, KAS11, BTMAT1, TDMAT6, HEMAT2 |
| 102 | FabZ         | (3R)-hydroxymyristoyl-(acyl carrier protein) dehydratase | 339               | HHYHL2, HDDHL5, HODHL8n, HTDHL6, HOCHL3, HICHL9, HBUHL1, HDEHL4, HHDHL7                |
| 103 | FadD         | Long-chain-fatty-acid--CoA ligase                        | 268, 286          | FACOAL180, FACOAL170(ISO), FACOAL200, FACOAL160, FACOAL140, FACOAL181, FACOAL120       |
| 104 | FatB         | Acyl ACP thioesterase                                    | 339               | FA140ACPH, FA120ACPH, FA200ACPH, FA160ACPH, FA180ACPH                                  |
| 105 | Fba          | fructose-1,6-bisphosphate aldolase                       | 354               | FBA                                                                                    |

| No  | Abbreviation | Full Name                                                                            | Model gene number                       | Reaction             |
|-----|--------------|--------------------------------------------------------------------------------------|-----------------------------------------|----------------------|
| 106 | Fbp          | fructose-1,6-bisphosphatase                                                          | 327                                     | FBP                  |
| 107 | Fdx          | Ferredoxin                                                                           | 44+47+488+243+187+37                    | FRHD                 |
| 108 | FeoB1        | ferrous iron transport protein B                                                     | 387                                     | FE2abc               |
| 109 | Fhs          | Formate--tetrahydrofolate ligase                                                     | 175                                     | MTHFC, FTHFLr, MTHFD |
| 110 | Fmt          | Methionyl-tRNA formyltransferase                                                     | 411                                     | FMETTRS              |
| 111 | FolB         | dihydroneopterin aldolase                                                            | 401, 402                                | DHNPA                |
| 112 | FolC         | folylpolyglutamate synthase                                                          | 7                                       | DHFS                 |
| 113 | FolD         | methylenetetrahydrofolate dehydrogenase / methenyltetrahydrofolate cyclohydrolase    | 173                                     | MTHFD, MTHFC         |
| 114 | FolE         | GTP cyclohydrolase I                                                                 | 319                                     | GTPCI                |
| 115 | FolK         | 7,8-dihydro-6-hydroxymethylpterin pyrophosphokinase                                  | 402                                     | HPPK                 |
| 116 | FolP         | dihydropteroate synthase                                                             | 401                                     | DHPS3, DHPS1         |
| 117 | Frd          | fumarate reductase, cytoplasmic                                                      | 420                                     | FRD5                 |
| 118 | FrdH         | Ferredoxin hydrogenase                                                               | 23+20+22+21+483+150+240+246+245+238+239 | FRHD                 |
| 119 | FruK         | fructose 1-phosphate kinase                                                          | 355                                     | F1PK                 |
| 120 | FucA         | L-fuculose phosphate aldolase                                                        | 410                                     | FCLPA                |
| 121 | FumB         | fumarase B (fumarate hydratase, Class I)                                             | 98                                      | FUM                  |
| 122 | GabT         | 4-aminobutyrate aminotransferase                                                     | 333                                     | ABTA                 |
| 123 | GalE         | UDP-glucose 4-epimerase                                                              | 475, 477, 346, 476                      | UDPG4E               |
| 124 | GalF         | glucose-1-phosphate uridylyltransferase                                              | 121, 122                                | GALU                 |
| 125 | Gap          | glyceraldehyde-3-phosphate dehydrogenase                                             | 143                                     | GAPD                 |
| 126 | GatABC       | glutamyl-tRNA(Gln) amidotransferase                                                  | 350+390+349                             | GLUADT               |
| 127 | GlcK         | Glucokinase                                                                          | 13                                      | HEX1                 |
| 128 | GlgA1        | Glycogen synthase                                                                    | 284, 280                                | GLCS1                |
| 129 | GlgC         | glucose-1-phosphate adenylyltransferase                                              | 215, 322, 89, 481                       | GLGC                 |
| 130 | GlmM         | phosphoglucosamine mutase                                                            | 114, 120                                | PGAMT                |
| 131 | GlmS         | glutamine-fructose-6-phosphate transaminase                                          | 123                                     | GF6PTA               |
| 132 | GlmU         | Glucosamine-1-phosphate acetyltransferase/ UDP-N-acetylglucosamine pyrophosphorylase | 121, 122                                | UAGDP, G1PACT        |
| 133 | GlnA         | glutamine synthetase                                                                 | 290, 454                                | GLNS                 |
| 134 | GlnH         | Glutamine-binding protein GlnH                                                       | 81                                      | GLNabc               |
| 135 | GlnP         | Glutamine transport system permease protein GlnP                                     | 80                                      | GLNabc               |

| No  | Abbreviation | Full Name                                                                           | Model gene number | Reaction                             |
|-----|--------------|-------------------------------------------------------------------------------------|-------------------|--------------------------------------|
| 136 | GlnQ         | Glutamine transport ATP-binding protein GlnQ                                        | 79                | GLNabc                               |
| 137 | GlnS         | glutamyl-tRNA synthetase                                                            | 357               | GLNTRS                               |
| 138 | GloB         | hydroxyacylglutathione hydrolase                                                    | 88, 205           | GLYOX                                |
| 139 | GltAB        | glutamate synthase                                                                  | 298, 296          | GLUSx                                |
| 140 | GltB         | Glutamate synthase [nadph] small chain                                              | 26, 295, 244      | GLUSy                                |
| 141 | GltBD        | Glutamate synthase [nadph]                                                          | 293+292+11        | GLUSy                                |
| 142 | GltX         | glutamyl-tRNA synthetase                                                            | 357               | GLUTRS                               |
| 143 | GlyA         | glycine hydroxymethyltransferase                                                    | 87                | ALATA_D2, ALATA_L2, GHMT             |
| 144 | GlyQS        | glycine-tRNA synthetase                                                             | 206               | GLYTRS                               |
| 145 | GmhA         | Phosphoheptose isomerase                                                            | 424               | S7PI                                 |
| 146 | Gmk          | guanylate kinase                                                                    | 9                 | DGK1, GK1                            |
| 147 | GpmA         | Phosphoglycerate mutase                                                             | 372               | PGM                                  |
| 148 | GpsA         | NAD(P)H-dependent glycerol-3-phosphate dehydrogenase                                | 363               | G3PD2, G3PD1                         |
| 149 | GuaA         | GMP synthase                                                                        | 225               | GMPS2                                |
| 150 | GuaB         | IMP dehydrogenase                                                                   | 65                | IMPD                                 |
| 151 | GuaC         | GMP reductase                                                                       | 65                | GMPR                                 |
| 152 | HemD         | uroporphyrinogen III cosynthase                                                     | 412               | UPP3S, UPP3MT                        |
| 153 | HemN         | coproporphyrinogen III oxidase                                                      | 236               | CPPPGOAN2                            |
| 154 | HepT         | Heptaprenyl diphosphate synthase component II                                       | 67                | PPTT, OCTT, HEPTT, GGTT, FRTT, HEXTT |
| 155 | HisA         | phosphoribosylformimino-5-aminoimidazole carboxamide ribotide isomerase             | 348               | PRMICI                               |
| 156 | HisB         | imidazoleglycerol-phosphate dehydratase                                             | 230               | IGPDH                                |
| 157 | HisC         | histidinol-phosphate aminotransferase / tyrosine and phenylalanine aminotransferase | 231               | PHETA1, HSTPT, TYRTA                 |
| 158 | HisD         | histidinol dehydrogenase                                                            | 232               | HISTD                                |
| 159 | HisF         | imidazoleglycerol-phosphate synthase                                                | 294, 273, 297     | IG3PS                                |
| 160 | HisG         | ATP phosphoribosyltransferase                                                       | 233               | ATPPRT                               |
| 161 | HisI_N       | phosphoribosyl-AMP cyclohydrolase                                                   | 347               | PRAMPC, PRATPP                       |
| 162 | HisJ         | histidinol phosphate phosphatase                                                    | 425               | HISTP                                |
| 163 | HisS         | histidyl-tRNA synthetase                                                            | 3                 | HISTRS                               |
| 164 | HisS2        | Histidyl-tRNA synthetase                                                            | 234               | HISTRS                               |
| 165 | Hom          | homoserine dehydrogenase                                                            | 321               | HSDy                                 |
| 166 | Hpt          | Hypoxanthine-guanine phosphoribosyltransferase                                      | 196, 209          | GUAPRT, HXPRT                        |

| No  | Abbreviation | Full Name                                                     | Model gene number | Reaction                     |
|-----|--------------|---------------------------------------------------------------|-------------------|------------------------------|
| 167 | Icd          | isocitrate dehydrogenase                                      | 95                | ICDH <sub>y</sub>            |
| 168 | IleS         | Isoleucyl-tRNA synthetase                                     | 288               | ILETRS                       |
| 169 | IlvA         | L-threonine deaminase                                         | 320               | THRD_L, SERD_Lr              |
| 170 | IlvBH        | acetolactate synthase                                         | 222+223           | ACLS, ACHBS                  |
| 171 | IlvC         | ketol-acid reductoisomerase                                   | 221               | KARA1, KARA2                 |
| 172 | IlvD         | dihydroxy-acid dehydratase                                    | 224               | DHAD2, DHAD1, DHAD3          |
| 173 | IlvE         | branched-chain amino acid aminotransferase                    | 5                 | VALTA, ILETA, LEUTA          |
| 174 | IorAB1       | Indolepyruvate ferredoxin oxidoreductase                      | 269+270           | IOR, IOR3, IOR2              |
| 175 | IscS         | cysteine desulfurase                                          | 417               | THZPSN                       |
| 176 | IspA         | Geranyltranstransferase                                       | 67                | GRTT, DMATT                  |
| 177 | IspD         | 2-C-methyl-D-erythritol 4-phosphate<br>cytidyltransferase     | 16                | MEPCT                        |
| 178 | IspE         | 4-(cytidine 5'-diphospho)-2-C-methyl-D-erythritol<br>kinase   | 74                | CDPMEK                       |
| 179 | IspF         | 2-C-methyl-D-erythritol 2,4-cyclodiphosphate<br>synthase      | 17                | MECDPS                       |
| 180 | IspG         | 1-hydroxy-2-methyl-2-(E)-butenyl 4-diphosphate<br>synthase    | 57                | MECDPDH                      |
| 181 | IxpP         | dITP/XTP pyrophosphatase                                      | 328               | ITPASE, XTPASE               |
| 182 | KamA         | lysine 2,3-aminomutase                                        | 48, 153           | LYSAM                        |
| 183 | KefC         | Glutathione-regulated potassium-efflux system<br>protein KefC | 406               | Kt6                          |
| 184 | KefC2        | Glutathione-regulated potassium-efflux system<br>protein KefC | 180               | Kt6                          |
| 185 | Ldh          | L-lactate dehydrogenase                                       | 96                | LDH_L                        |
| 186 | LeuA         | 2-isopropylmalate synthase                                    | 220, 216          | IPPS                         |
| 187 | LeuB         | 3-isopropylmalate dehydrogenase                               | 217               | IPMD, IPMDH                  |
| 188 | LeuCD        | 3-isopropylmalate dehydratase                                 | 219+218+94+93     | IPPMib, IPPMIa, IPMI2, IPMI1 |
| 189 | LeuS         | Leucyl-tRNA synthetase                                        | 46                | LEUTRS                       |
| 190 | LpdA         | dihydrolipoamide dehydrogenase                                | 188               | GCCc                         |
| 191 | LpxB         | lipid A disaccharide synthase (IpxB)                          | 176               | LPADSS                       |
| 192 | LtaA         | threonine aldolase                                            | 415               | THRA, THRLAD                 |
| 193 | Lys1         | Saccharopine dehydrogenase (NAD, L-lysine<br>forming)         | 4                 | SACCD2                       |
| 194 | LysA         | diaminopimelate decarboxylase                                 | 124               | DAPDC                        |
| 195 | LysS         | Lysyl-tRNA synthetase                                         | 141, 247          | LYSTRS                       |



| No  | Abbreviation | Full Name                                                                    | Model gene number                                                                                              | Reaction                                               |
|-----|--------------|------------------------------------------------------------------------------|----------------------------------------------------------------------------------------------------------------|--------------------------------------------------------|
| 196 | LytB         | isoprenyl-pyrophosphate synthase and dimethylallyl diphosphate               | 353                                                                                                            | IPDPS, DMPPS                                           |
| 197 | ManA         | mannose-6-phosphate isomerase                                                | 113                                                                                                            | MAN6PI                                                 |
| 198 | ManC         | mannose 1-phosphate guanyltransferase                                        | 75                                                                                                             | MAN1PT2                                                |
| 199 | MazG         | Nucleotide triphosphate pyrophosphohydrolase                                 | 409                                                                                                            | NTPP2, NTPP5, NTPP6, NTPP4, NTPP3, NTPP8, NTPP1, NTPP7 |
| 200 | Mdh          | malate dehydrogenase                                                         | 96                                                                                                             | MDH                                                    |
| 201 | MenA         | 1,4-dihydroxy-2-naphthoate octaprenyltransferase                             | 73                                                                                                             | DHNAOT                                                 |
| 202 | MerA         | mercuric reductase                                                           | 188                                                                                                            | HGR                                                    |
| 203 | MetA1        | homoserine O-acetyltransferase                                               | 7                                                                                                              | HSAT                                                   |
| 204 | MetG         | methionyl-tRNA synthetase                                                    | 66                                                                                                             | METTRS                                                 |
| 205 | MetK         | S-adenosylmethionine synthetase                                              | 115                                                                                                            | METAT                                                  |
| 206 | MgsA         | methylglyoxal synthase                                                       | 397, 30                                                                                                        | MGSA                                                   |
| 207 | ModABC       | molybdenum ABC transporter                                                   | 496+498+497                                                                                                    | MOBDabc                                                |
| 208 | Mpg          | mannose-1-phosphate guanyltransferase                                        | 322, 481                                                                                                       | MAN1PT1                                                |
| 209 | MpgSP        | Mannosyl-3-phosphoglycerate synthase/mannosyl-3-phosphoglycerate phosphatase | 356                                                                                                            | MPGSP                                                  |
| 210 | MsrA         | methionine sulfoxide reductase                                               | 438, 330                                                                                                       | METSR-S1, METSR-S2                                     |
| 211 | MtaP         | 5'-methylthioadenosine phosphorylase                                         | 117                                                                                                            | MTAP                                                   |
| 212 | MurAA        | UDP-N-acetylglucosamine 1-carboxyvinyltransferase                            | 312                                                                                                            | UAGCVT                                                 |
| 213 | MurB         | UDP-N-acetylenolpyruvoylglucosamine reductase                                | 154                                                                                                            | UAPGR                                                  |
| 214 | NadA         | quinolinate synthetase                                                       | 399                                                                                                            | QULNS                                                  |
| 215 | NadB         | L-aspartate oxidase                                                          | 420                                                                                                            | ASPO1, ASPO6, ASPO4, ASPO3, ASPO5                      |
| 216 | NadC1        | nicotinate-nucleotide pyrophosphorylase                                      | 360                                                                                                            | NNDPR                                                  |
| 217 | NadD         | Nicotinate-nucleotide adenyltransferase                                      | 1                                                                                                              | NNATr, NMNATr                                          |
| 218 | NadE         | NH3-dependent NAD+ synthetase                                                | 302                                                                                                            | NADS1                                                  |
| 219 | NadE2        | Glutamine-dependent NAD(+) synthetase                                        | 289                                                                                                            | NADS2                                                  |
| 220 | Nadh5        | NADH dehydrogenase                                                           | 149+249+259+254+255+256+251+252+258+257+253+250+242+241+243+393+394+396+391+392+395+91+186+185+187+37+35+36+38 | NADH4, NADH7, NADH8, NADH6                             |
| 221 | NadK         | NAD Kinase                                                                   | 101                                                                                                            | NADK                                                   |
| 222 | Nadphd       | NADPH dehydrogenase                                                          | 37+243+187                                                                                                     | NADPH12                                                |

| No  | Abbreviation | Full Name                                                                | Model gene number                 | Reaction                                               |
|-----|--------------|--------------------------------------------------------------------------|-----------------------------------|--------------------------------------------------------|
| 223 | NasDE        | nitrite reductase                                                        | 296                               | NTRIRy, NTRIRx                                         |
| 224 | Ndk          | nucleoside diphosphate kinase                                            | 68                                | NDPK6, NDPK1, NDPK3, NDPK5, NDPK8, NDPK4, NDPK7, NDPK2 |
| 225 | Nif          | Nitrogenase                                                              | 495, 492, 493, 490, 489, 491, 494 | NITr                                                   |
| 226 | NifV         | homocitrate synthase                                                     | 404                               | HCITS                                                  |
| 227 | NikA         | nickel transport system substrate-binding protein A                      | 138, 436, 382                     | Nlabc                                                  |
| 228 | NikB         | nickel transport system substrate-binding protein B                      | 383, 435                          | Nlabc                                                  |
| 229 | NikC         | nickel transport system substrate-binding protein C                      | 434, 384                          | Nlabc                                                  |
| 230 | NikD         | nickel transport system substrate-binding protein D                      | 433, 385                          | Nlabc                                                  |
| 231 | NikE         | nickel transport system substrate-binding protein E                      | 432, 386                          | Nlabc                                                  |
| 232 | NrdD         | ribonucleoside-triphosphate reductase                                    | 52, 364                           | RNTR3, RNTR4, RNTR1, RNTR2                             |
| 233 | NrdEF        | ribonucleoside-diphosphate reductase                                     | 428, 151, 52                      | RNDR3, RNDR2, RNDR4, RNDR1                             |
| 234 | NtpA         | Dihydroneopterin triphosphate pyrophosphorylase                          | 125, 336, 312                     | DNMPPA, DNTPPA                                         |
| 235 | NudF         | ADP-ribose diphosphatase                                                 | 99                                | ADPRDP                                                 |
| 236 | OadD         | Oxaloacetate decarboxylase                                               | 24                                | OXAD2                                                  |
| 237 | Ocd          | ornithine cyclodeaminase                                                 | 414                               | ORNCD                                                  |
| 238 | Ofo          | 2-oxoglutarate synthase                                                  | 181+182+183+184                   | OOR2r                                                  |
| 239 | P_1.18.1.2   | ferredoxin-NADP reductase                                                | 11                                | FNOR2                                                  |
| 240 | P_3.7.1.5    | acylpyruvate hydrolase                                                   | 325                               | APYRH                                                  |
| 241 | PaaK         | phenylacetyl-CoA ligase                                                  | 285, 262                          | PACCOAL                                                |
| 242 | PabABC       | para-aminobenzoate synthase component I /4-amino-4-deoxychorismate lyase | 373                               | ADCS, ADCL                                             |
| 243 | PanB         | 3-methyl-2-oxobutanoate hydroxymethyltransferase                         | 211                               | MOHMT                                                  |
| 244 | PanC         | pantothenate synthase                                                    | 212                               | PANTS                                                  |
| 245 | PanD         | aspartate 1-decarboxylase                                                | 210                               | ASP1DC                                                 |
| 246 | PcaC2        | 4-carboxymuconolactone decarboxylase                                     | 39                                | CMLDC                                                  |
| 247 | PdhAB        | pyruvate dehydrogenase (E1 subunit)                                      | 183                               | PDH                                                    |
| 248 | PdxAJ        | Pyridoxine 5-phosphate biosynthetic protein                              | 64                                | PDX5PS                                                 |
| 249 | PdxHec       | Pyridoxine 5-phosphate oxidase                                           | 418                               | PDX5PO, PYAM5PO                                        |
| 250 | PfkB         | 6-phosphofructokinase II                                                 | 355                               | PFK, PFK_2                                             |

| No  | Abbreviation | Full Name                                                        | Model gene number | Reaction        |
|-----|--------------|------------------------------------------------------------------|-------------------|-----------------|
| 251 | PflC         | pyruvate formate lyase II                                        | 422               | OBTFL, PFLi     |
| 252 | Pfor         | Pyruvic-ferredoxin oxidoreductase                                | 181+182+183+184   | POR2            |
| 253 | Pgi          | glucose-6-phosphate isomerase                                    | 113               | PGI             |
| 254 | Pgk          | phosphoglycerate kinase                                          | 194               | PGK             |
| 255 | Pgml         | Phosphoglycerate mutase, cofactor independent                    | 408, 193          | PGM             |
| 256 | PgpA         | Phosphatidylglycerophosphate phosphohydrolase                    | 361               | PGPPH           |
| 257 | PgsA         | CDPdiacylglycerol-glycerol-3-phosphate 3-phosphatidyltransferase | 279               | CDGPT           |
| 258 | PheA         | prephenate dehydratase                                           | 103, 389          | PPNDH, CHORM    |
| 259 | PheRS        | phenylalanyl-tRNA synthetase                                     | 53+54             | PHETRS          |
| 260 | Phyd         | Pantetheine hydrolase (ECC 3.5.1.-)                              | 127               | PNTEH           |
| 261 | PitA         | Low-affinity inorganic phosphate transporter                     | 8                 | PIt6            |
| 262 | Pmdpht       | Pyrimidine phosphatase                                           | 361               | PMDPHT          |
| 263 | Pmgm1        | phosphoglucomutase/phosphomannomutase                            | 120, 114          | PMANM, PGMT     |
| 264 | PncB         | nicotinate phosphoribosyltransferase                             | 370               | NAMNPP, NCTPPRT |
| 265 | Ppa          | inorganic pyrophosphatase                                        | 55                | PPA             |
| 266 | Ppa1         | V-type H(+)-translocating pyrophosphatase                        | 200, 204          | PPA_1           |
| 267 | PpdK         | pyruvate phosphate dikinase                                      | 129               | PPDK            |
| 268 | Ppsa         | phosphoenolpyruvate synthase                                     | 129               | PPS             |
| 269 | ProA         | glutamate-5-semialdehyde dehydrogenase                           | 342               | G5SD            |
| 270 | ProB         | glutamate 5-kinase                                               | 341               | GLU5K           |
| 271 | ProC         | pyrroline-5-carboxylate reductase                                | 45                | P5CR            |
| 272 | ProPec       | MFS, proline proton symport                                      | 344               | PROt6, GLYBt6   |
| 273 | ProS         | Prolyl-tRNA synthetase                                           | 56                | PROTRS          |
| 274 | Prs          | phosphoribosylpyrophosphate synthetase                           | 86                | PRPPS           |
| 275 | PssA1        | CDP-diacylglycerol-serine O-phosphatidyltransferase              | 279               | CDPDSP          |
| 276 | PstABCS      | phosphate ABC transporter                                        | 34+31+33+32       | Plabc           |
| 277 | Ptps         | 6-pyruvoyltetrahydropterin synthase                              | 403               | PTHPS           |
| 278 | PurA         | adenylosuccinate synthetase                                      | 278               | ADSS            |
| 279 | PurB         | adenylosuccinate lyase                                           | 228               | ADSL1, ADSL2    |
| 280 | PurC         | phosphoribosylaminoimidazolesuccinocarboxamide synthase          | 229               | PRASCS          |
| 281 | PurD         | phosphoribosylglycinamide synthetase                             | 226               | PRAGS           |

| No  | Abbreviation | Full Name                                                                                            | Model gene number | Reaction        |
|-----|--------------|------------------------------------------------------------------------------------------------------|-------------------|-----------------|
| 282 | PurE         | phosphoribosylaminoimidazole carboxylase                                                             | 227               | AIRC            |
| 283 | PurF         | glutamine phosphoribosylidiphosphate amidotransferase                                                | 367               | GLUPRT          |
| 284 | PurH         | phosphoribosylaminoimidazole carboxy formyl formyltransferase / inosine-monophosphate cyclohydrolase | 369               | AICART, IMPCir  |
| 285 | PurL         | phosphoribosylformylglycinamide synthase II                                                          | 63                | PRFGS           |
| 286 | PurM         | phosphoribosylaminoimidazole synthetase                                                              | 368               | PRAIS           |
| 287 | PurN         | phosphoribosylglycinamide formyltransferase                                                          | 179, 329          | GARFT           |
| 288 | PurQ         | Phosphoribosylformylglycinamide synthase I                                                           | 62                | PRFGS           |
| 289 | PurUec       | Formyltetrahydrofolate deformylase                                                                   | 329               | FTHFD           |
| 290 | PuuT         | putrescine:2-oxoglutaric acid aminotransferase                                                       | 333               | ORNTA           |
| 291 | Pyc          | pyruvate carboxylase                                                                                 | 24+25             | PC              |
| 292 | Pyk          | pyruvate kinase                                                                                      | 129               | PYK             |
| 293 | PyrB         | aspartate carbamoyltransferase                                                                       | 314               | ASPCT           |
| 294 | PyrC         | dihydroorotase                                                                                       | 315               | DHORTS          |
| 295 | PyrD         | Dihydroorotate dehydrogenase                                                                         | 358               | DHORDf          |
| 296 | PyrE         | orotate phosphoribosyltransferase                                                                    | 311               | ORPT            |
| 297 | PyrF         | orotidine 5'-phosphate decarboxylase                                                                 | 6                 | OMPDC           |
| 298 | PyrG         | CTP synthase                                                                                         | 366               | CTPS1, CTPS2    |
| 299 | PyrH         | uridylate kinase                                                                                     | 61                | URIDK2, URIDK1  |
| 300 | PyrK         | Dihydroorotate dehydrogenase electron transfer subunit                                               | 10, 318           | DHORDf          |
| 301 | RbsK         | ribokinase                                                                                           | 178               | RBK             |
| 302 | RelA         | GTP pyrophosphokinase                                                                                | 2                 | GTPDK           |
| 303 | RfbA         | glucose-1-phosphate thymidyltransferase                                                              | 121, 122          | G1PTMT          |
| 304 | RibA         | GTP cyclohydrolase II / 3,4-dihydroxy-2-butanone 4-phosphate synthase                                | 308               | DB4PS, GTPCII   |
| 305 | RibD         | diaminohydroxyphosphoribosylaminopyrimidine deaminase                                                | 310               | DHPPDA2, APRAUR |
| 306 | RibEH        | riboflavin synthase                                                                                  | 307+309           | RBFSa, RBFSb    |
| 307 | RibF         | Riboflavin kinase / FMN adenyltransferase                                                            | 148               | FMNAT, RBFK     |
| 308 | RluB         | Pseudouridine synthase                                                                               | 112, 207, 281     | PSUDS           |

| No  | Abbreviation | Full Name                                                        | Model gene number | Reaction                          |
|-----|--------------|------------------------------------------------------------------|-------------------|-----------------------------------|
| 309 | RluD         | ribosomal large subunit pseudouridine synthase D                 | 359               | PSUDS                             |
| 310 | RpiB         | Ribose 5-phosphate isomerase                                     | 159               | RPI                               |
| 311 | SerA2        | D-3-phosphoglycerate dehydrogenase                               | 145               | PGCD, PGCDr                       |
| 312 | SerB         | phosphoserine phosphatase                                        | 324               | PSP_L                             |
| 313 | SerC         | phosphoserine transaminase                                       | 146               | PSERTr                            |
| 314 | SerS         | Seryl-tRNA synthetase                                            | 140               | SERTRS                            |
| 315 | SgcE         | putative ribulose-phosphate 3-epimerase                          | 158               | RPE                               |
| 316 | SodA         | Superoxide dismutase (mn)                                        | 272               | SOD                               |
| 317 | SpeA         | arginine decarboxylase                                           | 124               | ARGDC                             |
| 318 | SpeC         | Ornithine decarboxylase                                          | 124               | ORNDC                             |
| 319 | SucCD1       | Succinyl CoA synthetase                                          | 419               | SUCOAS                            |
| 320 | Tal          | Transaldolase                                                    | 365               | TAL                               |
| 321 | ThiC         | biosynthesis of the pyrimidine moiety of thiamin                 | 201               | AHMMPS, AMPMS                     |
| 322 | ThiD         | phosphomethylpyrimidine kinase                                   | 421               | PMPK                              |
| 323 | ThiE         | thiamine-phosphate pyrophosphorylase                             | 203               | HMPK4, HMPK3, TMPPP, HMPK1, HMPK2 |
| 324 | ThiL         | thiamine-monophosphate kinase                                    | 69                | TMPKr                             |
| 325 | ThrB         | homoserine kinase                                                | 303, 74           | HSK                               |
| 326 | ThrC         | threonine synthase                                               | 320               | THRS                              |
| 327 | ThrS         | Threonyl-tRNA synthetase                                         | 197               | THRTRS                            |
| 328 | ThyA         | thymidylate synthase                                             | 214               | TMDS                              |
| 329 | ThyX         | Thymidylate synthase (FAD)                                       | 381               | FDTS                              |
| 330 | TktB         | Transketolase                                                    | 160               | TKT2, TKT1                        |
| 331 | Tmk          | thymidylate kinase                                               | 202               | DTMPK, TMDK1                      |
| 332 | TpiA         | triose phosphate isomerase                                       | 192               | TPI                               |
| 333 | TrpA         | Tryptophan synthase alpha chain                                  | 380               | TRPS1                             |
| 334 | TrpB         | Tryptophan synthase beta chain                                   | 379, 287          | TRPS1                             |
| 335 | TrpC         | indole-3-glycerol-phosphate synthase                             | 376               | IGPS                              |
| 336 | TrpD         | anthranilate phosphoribosyltransferase/anthranilate component II | 375, 28           | ANPRT                             |
| 337 | TrpE         | anthranilate synthase component I                                | 373               | ANS1                              |
| 338 | TrpF         | phosphoribosyl anthranilate isomerase                            | 377               | PRAI                              |
| 339 | TrpG         | Anthranilate synthase component II                               | 374               | ANS1                              |
| 340 | TrpS         | tryptophanyl-tRNA synthetase                                     | 352               | TRPTRS                            |
| 341 | TrxB         | thioredoxin reductase                                            | 126               | TRDR                              |

| No  | Abbreviation | Full Name                                                                   | Model gene number | Reaction       |
|-----|--------------|-----------------------------------------------------------------------------|-------------------|----------------|
| 342 | TtdA         | Fumarate hydratase                                                          | 97                | FUM            |
| 343 | TyrA         | prephenate dehydrogenase                                                    | 102               | PPND           |
| 344 | TyrS         | tyrosyl-tRNA synthetase                                                     | 147               | TYRTRS         |
| 345 | UbiE         | ubiquinone biosynthesis methyltransferase UbiE                              | 12, 71, 400, 70   | OMBZLM         |
| 346 | UbiG         | 3-demethylubiquinone-9 3-methyltransferase                                  | 371               | DMQMT, OHPHM   |
| 347 | Upp2         | uracil phosphoribosyltransferase/ pyrimidine operon regulatory protein pyrr | 313               | UPPRT          |
| 348 | UppS         | undecaprenyl-diphosphate synthase                                           | 60                | UDPDP5         |
| 349 | ValS         | Valyl-tRNA synthetase                                                       | 85                | VALTRS         |
| 350 | XylA         | xylose isomerase                                                            | 299               | XYLI2i         |
| 351 | YkrS         | 5-methylthioribose kinase                                                   | 118               | MTRI           |
| 352 | YlbQ         | 2-dehydropantoate 2-reductase                                               | 221, 102          | DPR            |
| 353 | YngE         | Propionyl-CoA carboxylase                                                   | 92                | PPCOAC         |
| 354 | ZnuA         | High-affinity zinc uptake system protein znuA precursor                     | 155               | ZN2abc2, MNabc |
| 355 | ZnuB         | High-affinity zinc uptake system membrane protein ZnuB                      | 157               | ZN2abc2, MNabc |
| 356 | ZnuC         | High-affinity zinc uptake system atp-binding protein ZnuC                   | 156               | ZN2abc2, MNabc |

**Table 9. List of Reactions of *i*AI549 Associated with Core Genes (Core Reactions)**

| No | Abbreviation | Name                                         | Equation                                              | Subsystem             | Model gene number | Protein    | Protein Classification |
|----|--------------|----------------------------------------------|-------------------------------------------------------|-----------------------|-------------------|------------|------------------------|
| 1  | ACGK         | acetylglutamate kinase                       | [c] : acglu + atp --> acg5p + adp                     | Amino Acid Metabolism | 332               | ArgB1      | EC-2.7.2.8             |
| 2  | ACGS         | N-acetylglutamate synthase                   | [c] : accoa + glu-L --> acglu + coa + h               | Amino Acid Metabolism | 331, 119, 100     | ArgA, ArgJ | EC-2.3.1.1             |
| 3  | ACHBS        | 2-aceto-2-hydroxybutanoate synthase          | [c] : 2obut + h + pyr --> 2ahbut + co2                | Amino Acid Metabolism | 222+223           | IlvBH      |                        |
| 4  | ACLS         | acetolactate synthase (Also catalyzes ACHBS) | [c] : h + (2) pyr --> alac-S + co2                    | Amino Acid Metabolism | 222+223           | IlvBH      | EC-4.1.3.18            |
| 5  | ACOTA        | acetylornithine transaminase                 | [c] : acorn + akgl <=> acg5sa + glu-L                 | Amino Acid Metabolism | 333               | ArgD       | EC-2.6.1.11            |
| 6  | AGPR         | N-acetyl-g-glutamyl-phosphate reductase      | [c] : acg5sa + nadp + pi <=> acg5p + h + nadph        | Amino Acid Metabolism | 405               | ArgC       | EC-1.2.1.38            |
| 7  | ALAALA       | D-alanine-D-alanine ligase (reversible)      | [c] : (2) ala-D + atp <=> adp + alaala + h + pi       | Amino Acid Metabolism | 154               | Ddl        | EC-6.3.2.4             |
| 8  | ALATA_L      | L-alanine transaminase                       | [c] : akgl + ala-L <=> glu-L + pyr                    | Amino Acid Metabolism | 351               | AlaT       | EC-2.6.1.2             |
| 9  | ALATRS       | Alanyl-tRNA synthetase                       | [c] : ala-L + atp + trnaala --> alatrna + amp + ppi   | Amino Acid Metabolism | 14                | AlaS       | EC-6.1.1.7             |
| 10 | ANPRT        | anthranilate phosphoribosyltransferase       | [c] : anth + prpp --> ppi + pran                      | Amino Acid Metabolism | 375, 28           | TrpD       | EC-2.4.2.18            |
| 11 | ANS1         | anthranilate synthase                        | [c] : chor + gln-L --> anth + glu-L + h + pyr         | Amino Acid Metabolism | 373, 374          | TrpG+TrpE  | EC-4.1.3.27            |
| 12 | APYRH        | 3-Fumarylpyruvate acylhydrolase              | [c] : 3fpyr + h2o --> fum + h + pyr                   | Amino Acid Metabolism | 325               | P_3.7.1.5  | EC-3.7.1.5             |
| 13 | ARGDC        | arginine decarboxylase                       | [c] : arg-L + h --> agm + co2                         | Amino Acid Metabolism | 124               | SpeA       | EC-4.1.1.19            |
| 14 | ARGSL        | argininosuccinate lyase                      | [c] : argsuc <=> arg-L + fum                          | Amino Acid Metabolism | 335               | ArgH       | EC-4.3.2.1             |
| 15 | ARGSS        | argininosuccinate synthase                   | [c] : asp-L + atp + citr-L --> amp + argsuc + h + ppi | Amino Acid Metabolism | 334               | ArgG       | EC-6.3.4.5             |
| 16 | ARGTRS       | Arginyl-tRNA synthetase                      | [c] : arg-L + atp + trnaarg --> amp + argtrna + ppi   | Amino Acid Metabolism | 337               | ArgS       | EC-6.1.1.19            |
| 17 | ASAD         | aspartate-semialdehyde dehydrogenase         | [c] : aspsa + nadp + pi <=> 4pasp + h + nadph         | Amino Acid Metabolism | 276               | Asd        | EC-1.2.1.11            |
| 18 | ASNS2        | asparagine synthetase                        | [c] : asp-L + atp + nh4 --> amp + asn-L + h + ppi     | Amino Acid Metabolism | 42                | AsnA       | EC-6.3.1.1             |
| 19 | ASPK         | aspartate kinase                             | [c] : asp-L + atp <=> 4pasp + adp                     | Amino Acid Metabolism | 407               | AspK       | EC-2.7.2.4             |
| 20 | ASPT         | L-aspartase                                  | [c] : asp-L --> fum + nh4                             | Amino Acid Metabolism | 335               | AspA       | EC-4.3.1.1             |

| No | Abbreviation | Name                                                          | Equation                                                    | Subsystem             | Model gene number | Protein     | Protein Classification |
|----|--------------|---------------------------------------------------------------|-------------------------------------------------------------|-----------------------|-------------------|-------------|------------------------|
| 21 | ASPTA1       | aspartate transaminase                                        | [c] : ak <sub>g</sub> + asp-L <=> glu-L + oaa               | Amino Acid Metabolism | 139, 351, 190     | AspC        | EC-2.6.1.1             |
| 22 | ASPTRS       | Aspartyl-tRNA synthetase                                      | [c] : asp-L + atp + trnaasp --> amp + asptrna + ppi         | Amino Acid Metabolism | 177               | AspS        | EC-6.1.1.12            |
| 23 | ATPPRT       | ATP phosphoribosyltransferase                                 | [c] : atp + prpp --> ppi + prbatp                           | Amino Acid Metabolism | 233               | HisG        | EC-2.4.2.17            |
| 24 | CHORM        | chorismate mutase                                             | [c] : chor --> pphn                                         | Amino Acid Metabolism | 103, 389          | PheA        | EC-5.4.99.5            |
| 25 | CHORS        | chorismate synthase                                           | [c] : 3psme --> chor + pi                                   | Amino Acid Metabolism | 104               | AroC1       | EC-4.2.3.5             |
| 26 | CITRMS       | (R)-citramalate synthase                                      | [c] : accoa + h + h2o + pyr <=> citrml + coa                | Amino Acid Metabolism | 216               | CimA        | EC-2.3.1               |
| 27 | CYSS         | cysteine synthase                                             | [c] : acser + h2s --> ac + cys-L                            | Amino Acid Metabolism | 299               | CysKec      | EC-4.2.99.8            |
| 28 | CYSTRS       | Cysteinyl-tRNA synthetase                                     | [c] : atp + cys-L + trnacys --> amp + cystrna + ppi         | Amino Acid Metabolism | 18                | CysS        | EC-6.1.1.16            |
| 29 | DAHPS        | 3-deoxy-D-arabino-heptulosonate 7-phosphate synthetase        | [c] : e4p + h2o + pep --> 2dda7p + pi                       | Amino Acid Metabolism | 110, 378          | AroG, AroA2 | EC-4.1.2.15            |
| 30 | DAPAT        | LL-Diaminopimelate aminotransferase                           | [c] : 26dap-LL + ak <sub>g</sub> <=> glu-L + h + h2o + thdp | Amino Acid Metabolism | 190               | DapAT       |                        |
| 31 | DAPDC        | diaminopimelate decarboxylase                                 | [c] : 26dap-M + h --> co2 + lys-L                           | Amino Acid Metabolism | 124               | LysA        | EC-4.1.1.20            |
| 32 | DAPE         | diaminopimelate epimerase                                     | [c] : 26dap-LL <=> 26dap-M                                  | Amino Acid Metabolism | 191               | DapF        | EC-5.1.1.7             |
| 33 | DHAD1        | dihydroxy-acid dehydratase (2,3-dihydroxy-3-methylbutanoate)  | [c] : 23dhmb --> 3mob + h2o                                 | Amino Acid Metabolism | 224               | IlvD        | EC-4.2.1.9             |
| 34 | DHAD2        | Dihydroxy-acid dehydratase (2,3-dihydroxy-3-methylpentanoate) | [c] : 23dhmp --> 3mop + h2o                                 | Amino Acid Metabolism | 224               | IlvD        |                        |
| 35 | DHAD3        | dihydroxy-acid dehydratase (2,3-dihydroxy-3-methylpentanoate) | [c] : 23dhmp --> 2o3mpt + h2o                               | Amino Acid Metabolism | 224               | IlvD        | EC-4.2.1.9             |
| 36 | DHDPRy       | dihydrodipicolinate reductase (NADPH)                         | [c] : 23dhdp + h + nadph --> nadp + thdp                    | Amino Acid Metabolism | 275               | DapB        | EC-1.3.1.26            |
| 37 | DHDPS        | dihydrodipicolinate synthase                                  | [c] : aspsa + pyr --> 23dhdp + h + (2) h2o                  | Amino Acid Metabolism | 277               | DapA        | EC-4.2.1.52            |
| 38 | DHQD         | 3-dehydroquinate dehydratase                                  | [c] : 3dhq <=> 3dhsk + h2o                                  | Amino Acid Metabolism | 108               | AroD1       | EC-4.2.1.10            |



| No | Abbreviation | Name                                           | Equation                                                             | Subsystem             | Model gene number     | Protein     | Protein Classification |
|----|--------------|------------------------------------------------|----------------------------------------------------------------------|-----------------------|-----------------------|-------------|------------------------|
| 39 | DHQS         | 3-dehydroquinate synthase                      | [c] : 2dda7p --> 3dhq + pi                                           | Amino Acid Metabolism | 109, 72               | AroB        | EC-4.2.3.4             |
| 40 | FMETDF       | formylmethionine deformylase                   | [c] : fmet + h2o --> for + met-L                                     | Amino Acid Metabolism | 199                   | Def         | EC-3.5.1.31            |
| 41 | FMETTRS      | Methionyl-tRNA formyltransferase               | [c] : 10fthf + mettrna --> fmettrna + thf                            | Amino Acid Metabolism | 411                   | Fmt         | EC-2.1.2.9             |
| 42 | FTHFLr       | formate-tetrahydrofolate ligase                | [c] : atp + for + thf <==> 10fthf + adp + pi                         | Amino Acid Metabolism | 175                   | Fhs         | EC-6.3.4.3             |
| 43 | G5SD         | glutamate-5-semialdehyde dehydrogenase         | [c] : glu5p + h + nadph --> glu5sa + nadp + pi                       | Amino acid Metabolism | 342                   | ProA        | EC-1.2.1.41            |
| 44 | GCCc         | glycine-cleavage complex                       | [c] : dhlpro + nad --> h + lpro + nadh                               | Amino Acid Metabolism | 188                   | LpdA        | EC-1.8.1.4             |
| 45 | GHMT         | glycine hydroxymethyltransferase               | [c] : ser-L + thf <==> gly + h2o + mlthf                             | Amino Acid Metabolism | 87                    | GlyA        | EC-2.1.2.1             |
| 46 | GLNS         | glutamine synthetase                           | [c] : atp + glu-L + nh4 --> adp + gln-L + h + pi                     | Amino Acid Metabolism | 290, 454              | GlnA        | EC-6.3.1.2             |
| 47 | GLNTRS       | Glutamyl-tRNA synthetase                       | [c] : atp + gln-L + trnagln --> amp + glntrna + ppi                  | Amino Acid Metabolism | 357                   | GlnS        | EC-6.1.1.18            |
| 48 | GLU5K        | glutamate 5-kinase                             | [c] : atp + glu-L --> adp + glu5p                                    | Amino Acid Metabolism | 341                   | ProB        | EC-2.7.2.11            |
| 49 | GLUADT       | glutamyl-tRNA synthase (glutamine-hydrolysing) | [c] : atp + gln-L + glutrna + h2o --> adp + glntrna + glu-L + h + pi | Amino Acid Metabolism | 350+390+349           | GatABC      |                        |
| 50 | GLUSy        | glutamate synthase (NADPH)                     | [c] : akgl + gln-L + h + nadph --> (2) glu-L + nadp                  | Amino Acid Metabolism | 26+295+244+293+292+11 | GltBD, GltB | EC-1.4.1.13            |
| 51 | GLUTRS       | Glutamyl-tRNA synthetase                       | [c] : atp + glu-L + trnaglu --> amp + glutrna + ppi                  | Amino Acid Metabolism | 357                   | GltX        | EC-6.1.1.17            |
| 52 | GLYTRS       | Glycyl-tRNA synthetase                         | [c] : atp + gly + trnagly --> amp + glytrna + ppi                    | Amino Acid Metabolism | 206                   | GlyQS       | EC-6.1.1.14            |
| 53 | HCITS        | homocitrate synthase                           | [c] : accoa + akgl + h2o --> coa + h + hcit                          | Amino Acid Metabolism | 404                   | NifV        | EC-4.1.3.21            |
| 54 | HISTD        | histidinol dehydrogenase                       | [c] : h2o + histd + (2) nad --> (3) h + his-L + (2) nadh             | Amino Acid Metabolism | 232                   | HisD        | EC-1.1.1.23            |
| 55 | HISTRs       | Histidyl-tRNA synthetase                       | [c] : atp + his-L + trnahis --> amp + histrna + ppi                  | Amino Acid Metabolism | 3, 234                | HisS2, HisS | EC-6.1.1.21            |
| 56 | HSAT         | Acetyl-CoA:L-homoserine O-acetyltransferase    | [c] : accoa + hom-L <==> achms + coa                                 | Amino Acid Metabolism | 7                     | MetA1       | EC-2.3.1.31            |
| 57 | HSDy         | homoserine dehydrogenase (NADPH)               | [c] : hom-L + nadp <==> aspsa + h + nadph                            | Amino Acid Metabolism | 321                   | Hom         | EC-1.1.1.3             |
| 58 | HSK          | homoserine kinase                              | [c] : atp + hom-L --> adp + h + phom                                 | Amino Acid Metabolism | 303, 74               | ThrB        | EC-2.7.1.39            |
| 59 | HSTPT        | histidinol-phosphate transaminase              | [c] : glu-L + imacp --> akgl + h + hisp                              | Amino Acid Metabolism | 231                   | HisC        | EC-2.6.1.9             |

| No | Abbreviation | Name                                                          | Equation                                             | Subsystem             | Model gene number | Protein | Protein Classification |
|----|--------------|---------------------------------------------------------------|------------------------------------------------------|-----------------------|-------------------|---------|------------------------|
| 60 | IG3PS        | Imidazole-glycerol-3-phosphate synthase                       | [c] : gln-L + prlp --> aicar + eig3p + glu-L + (2) h | Amino Acid Metabolism | 294, 273, 297     | HisF    |                        |
| 61 | IGPDH        | imidazoleglycerol-phosphate dehydratase                       | [c] : eig3p + h --> h2o + imacp                      | Amino Acid Metabolism | 230               | HisB    | EC-4.2.1.19            |
| 62 | IGPS         | indole-3-glycerol-phosphate synthase                          | [c] : 2cpr5p + h --> 3ig3p + co2 + h2o               | Amino Acid Metabolism | 376               | TrpC    | EC-4.1.1.48            |
| 63 | ILETA        | isoleucine transaminase                                       | [c] : akg + ile-L <==> 3mop + glu-L                  | Amino Acid Metabolism | 5                 | IIVe    | EC-2.6.1.42            |
| 64 | ILETRS       | Isoleucyl-tRNA synthetase                                     | [c] : atp + ile-L + trnaile --> amp + iletrna + ppi  | Amino Acid Metabolism | 288               | IleS    | EC-6.1.1.5             |
| 65 | IPMD         | 3-isopropylmalate dehydrogenase                               | [c] : 3c2hmp + nad --> 3c4mop + h + nadh             | Amino Acid Metabolism | 217               | LeuB    | EC-1.1.1.85            |
| 66 | IPMDH        | Isopropylmalate dehydrogenase                                 | [c] : de3mlt + nad <==> 2obut + co2 + (2) h + nadh   | Amino Acid Metabolism | 217               | LeuB    |                        |
| 67 | IPMI1        | Isopropylmalate isomerase                                     | [c] : citrml <==> ccnt + h2o                         | Amino Acid Metabolism | 219+218+94+93     | LeuCD   | EC-4.2.1.35            |
| 68 | IPMI2        | Isopropylmalate isomerase                                     | [c] : ccnt + h2o <==> de3mlt                         | Amino Acid Metabolism | 219+218+94+93     | LeuCD   |                        |
| 69 | IPPM1a       | 3-isopropylmalate dehydratase                                 | [c] : 3c2hmp <==> 2ippm + h2o                        | Amino Acid Metabolism | 219+218+94+93     | LeuCD   | EC-4.2.1.33            |
| 70 | IPPM1b       | 2-isopropylmalate hydratase                                   | [c] : 2ippm + h2o <==> 3c3hmp                        | Amino Acid Metabolism | 219+218+94+93     | LeuCD   |                        |
| 71 | IPPS         | 2-isopropylmalate synthase                                    | [c] : 3mob + accoa + h2o --> 3c3hmp + coa + h        | Amino Acid Metabolism | 220, 216          | LeuA    | EC-4.1.3.12            |
| 72 | KARA1        | ketol-acid reductoisomerase (2,3-dihydroxy-3-methylbutanoate) | [c] : 23dhmb + nadp <==> alac-S + h + nadph          | Amino Acid Metabolism | 221               | IIVc    | EC-1.1.1.86            |
| 73 | KARA2        | ketol-acid reductoisomerase (2-Acetolactate)                  | [c] : 2ahbut + h + nadph <==> 23dhmp + nadp          | Amino Acid Metabolism | 221               | IIVc    | EC-1.1.1.86            |
| 74 | LEUTA        | leucine transaminase                                          | [c] : akg + leu-L <==> 4mop + glu-L                  | Amino Acid Metabolism | 5                 | IIVe    | EC-2.6.1.42            |
| 75 | LEUTRS       | Leucyl-tRNA synthetase                                        | [c] : atp + leu-L + trnaleu --> amp + leutrna + ppi  | Amino Acid Metabolism | 46                | LeuS    | EC-6.1.1.4             |
| 76 | LYSAM        | lysine 2,3-aminomutase                                        | [c] : lys-L <==> 36dahx                              | Amino Acid Metabolism | 48, 153           | KamA    | EC-5.4.3.2             |
| 77 | LYSTRS       | Lysyl-tRNA synthetase                                         | [c] : atp + lys-L + trnalys --> amp + lystrna + ppi  | Amino Acid Metabolism | 141, 247          | LysS    | EC-6.1.1.6             |
| 78 | METAT        | methionine adenosyltransferase                                | [c] : atp + h2o + met-L --> amet + pi + ppi          | Amino Acid Metabolism | 115               | MetK    | EC-2.5.1.6             |
| 79 | METSR-S1     | L-methionine-S-oxide reductase (trdrd)                        | [c] : metox + trdrd --> h2o + met-L + trdox          | Amino Acid Metabolism | 438, 330          | MsrA    |                        |

| No | Abbreviation | Name                                                                                              | Equation                                                                 | Subsystem             | Model gene number | Protein | Protein Classification |
|----|--------------|---------------------------------------------------------------------------------------------------|--------------------------------------------------------------------------|-----------------------|-------------------|---------|------------------------|
| 80 | METSR-S2     | L-methionine S-oxide reductase (H <sub>2</sub> O <sub>2</sub> )                                   | [c] : h <sub>2</sub> o <sub>2</sub> + met-L --> h <sub>2</sub> o + metox | Amino Acid Metabolism | 438, 330          | MsrA    |                        |
| 81 | METTRS       | Methionyl-tRNA synthetase                                                                         | [c] : atp + met-L + trnmet --> amp + mettrna + ppi                       | Amino Acid Metabolism | 66                | MetG    | EC-6.1.1.10            |
| 82 | MTRI         | 5-methylthioribose-1-phosphate isomerase                                                          | [c] : 5mdr1p <==> 5mdru1p                                                | Amino Acid Metabolism | 118               | YkrS    | EC-5.3.1.23            |
| 83 | OCBT         | ornithine carbamoyltransferase                                                                    | [c] : cbp + orn-L <==> citr-L + h + pi                                   | Amino Acid Metabolism | 362               | ArgF    | EC-2.1.3.3             |
| 84 | ORNDC        | ornithine decarboxylase                                                                           | [c] : h + orn-L --> co <sub>2</sub> + ptrc                               | Amino Acid Metabolism | 124               | SpeC    | EC-4.1.1.17            |
| 85 | ORNTA        | ornithine transaminase                                                                            | [c] : ak <sub>g</sub> + orn-L --> glu-L + glu5sa                         | Amino Acid Metabolism | 333               | PuuT    | EC-2.6.1.13            |
| 86 | ORNTAC       | ornithine transacetylase                                                                          | [c] : acorn + glu-L <==> acglu + orn-L                                   | Amino Acid Metabolism | 331               | ArgJ    | EC-2.3.1.35            |
| 87 | P5CR         | pyrroline-5-carboxylate reductase                                                                 | [c] : 1pyr5c + (2) h + nadph --> nadp + pro-L                            | Amino Acid Metabolism | 45                | ProC    | EC-1.5.1.2             |
| 88 | PGCD         | phosphoglycerate dehydrogenase                                                                    | [c] : 3pg + nad --> 3php + h + nadh                                      | Amino Acid Metabolism | 145               | SerA2   | EC-1.1.1.95            |
| 89 | PGCDr        | phosphoglycerate dehydrogenase                                                                    | [c] : 3pg + nad <==> 3php + h + nadh                                     | Amino Acid Metabolism | 145               | SerA2   | EC-1.1.1.95            |
| 90 | PHETA1       | phenylalanine transaminase                                                                        | [c] : ak <sub>g</sub> + phe-L <==> glu-L + phpyr                         | Amino Acid Metabolism | 231               | HisC    | EC-2.6.1.58            |
| 91 | PHETRS       | Phenylalanyl-tRNA synthetase                                                                      | [c] : atp + phe-L + trnaphe --> amp + phetrna + ppi                      | Amino Acid Metabolism | 53+54             | PheRS   | EC-6.1.1.20            |
| 92 | PPND         | prephenate dehydrogenase                                                                          | [c] : nad + pphn --> 34hpp + co <sub>2</sub> + nadh                      | Amino Acid Metabolism | 102               | TyrA    | EC-1.3.1.12            |
| 93 | PPNDH        | prephenate dehydratase                                                                            | [c] : h + pphn --> co <sub>2</sub> + h <sub>2</sub> o + phpyr            | Amino Acid Metabolism | 103, 389          | PheA    | EC-4.2.1.51            |
| 94 | PRAI         | phosphoribosylanthranilate isomerase                                                              | [c] : pran <==> 2cpr5p                                                   | Amino Acid Metabolism | 377               | TrpF    | EC-5.3.1.24            |
| 95 | PRAMPC       | phosphoribosyl-AMP cyclohydrolase                                                                 | [c] : h + h <sub>2</sub> o + prbamp --> prfp                             | Amino Acid Metabolism | 347               | HisI_N  | EC-3.5.4.19            |
| 96 | PRATPP       | phosphoribosyl-ATP pyrophosphatase                                                                | [c] : h <sub>2</sub> o + prbatp --> h + ppi + prbamp                     | Amino Acid Metabolism | 347               | HisI_N  | EC-3.6.1.31            |
| 97 | PRMICI       | 1-(5-phosphoribosyl)-5-[(5-phosphoribosylamino)methylideneamino]imidazole-4-carboxamide isomerase | [c] : prfp <==> prlp                                                     | Amino Acid Metabolism | 348               | HisA    | EC-5.3.1.16            |
| 98 | PROTRS       | Prolyl-tRNA synthetase                                                                            | [c] : atp + pro-L + trnapro --> amp + ppi + protrna                      | Amino Acid Metabolism | 56                | ProS    | EC-6.1.1.15            |
| 99 | PSCVT        | 3-phosphoshikimate 1-carboxyvinyltransferase                                                      | [c] : pep + skm5p <==> 3psme + pi                                        | Amino Acid Metabolism | 105               | AroA    | EC-2.5.1.19            |

| No  | Abbreviation | Name                                               | Equation                                               | Subsystem             | Model gene number  | Protein   | Protein Classification |
|-----|--------------|----------------------------------------------------|--------------------------------------------------------|-----------------------|--------------------|-----------|------------------------|
| 100 | PSERTr       | 3-phosphoserine aminotransferase                   | [c] : 3php + glu-L <==> akg + pser-L                   | Amino Acid Metabolism | 146                | SerC      | EC-2.6.1.52            |
| 101 | PSP_L        | phosphoserine phosphatase (L-serine)               | [c] : h2o + pser-L --> pi + ser-L                      | Amino Acid Metabolism | 324                | SerB      | EC-3.1.3.3             |
| 102 | SACCD2       | saccharopine dehydrogenase (NAD, L-lysine forming) | [c] : Lsacchrp + h2o + nad <==> akg + h + lys-L + nadh | Amino Acid Metabolism | 4                  | Lys1      | EC-1.5.1.7             |
| 103 | SADT2        | sulfate adenylyltransferase                        | [c] : atp + gtp + h2o + so4 --> aps + gdp + pi + ppi   | Amino Acid Metabolism | 343, 283, 282, 237 | CysH      | EC-2.7.7.4             |
| 104 | SDPDS        | succinyl-diaminopimelate desuccinylase             | [c] : h2o + sl26da --> 26dap-LL + succ                 | Amino Acid Metabolism | 127, 198           | DapE      | EC-3.5.1.18            |
| 105 | SDPTA        | succinyl-diaminopimelate transaminase              | [c] : akg + sl26da <==> glu-L + sl2a6o                 | Amino Acid Metabolism | 333                | ArgD      | EC-2.6.1.17            |
| 106 | SERAT        | serine O-acetyltransferase                         | [c] : accoa + ser-L <==> acser + coa                   | Amino Acid Metabolism | 398                | CysE      | EC-2.3.1.30            |
| 107 | SERD_Lr      | L-serine deaminase                                 | [c] : ser-L <==> nh4 + pyr                             | Amino Acid Metabolism | 320                | IlvA      | EC-4.3.1.17            |
| 108 | SERTRS       | Seryl-tRNA synthetase                              | [c] : atp + ser-L + trnser --> amp + ppi + sertrna     | Amino Acid Metabolism | 140                | SerS      | EC-6.1.1.11            |
| 109 | SHK3D        | shikimate dehydrogenase                            | [c] : 3dhsk + h + nadph <==> nadp + skm                | Amino Acid Metabolism | 107                | AroE1     | EC-1.1.1.25            |
| 110 | SHKK         | shikimate kinase                                   | [c] : atp + skm --> adp + h + skm5p                    | Amino Acid Metabolism | 106                | AroK      | EC-2.7.1.71            |
| 111 | SOD          | superoxide dismutase                               | [c] : (2) h + (2) o2- --> h2o2 + o2                    | Amino Acid Metabolism | 272                | SodA      | EC-1.15.1.1            |
| 112 | THDPS        | tetrahydropicolinate succinylase                   | [c] : h2o + succoa + thdp --> coa + sl2a6o             | Amino Acid Metabolism | 121                | DapD      | EC-2.3.1.117           |
| 113 | THRD_L       | L-threonine deaminase                              | [c] : thr-L --> 2obut + nh4                            | Amino Acid Metabolism | 320                | IlvA      |                        |
| 114 | THRPD        | threonine-phosphate decarboxylase                  | [c] : h + thrp --> 1ap2olp + co2                       | Amino Acid Metabolism | 165                | CobQ-CobD |                        |
| 115 | THRS         | threonine synthase                                 | [c] : h2o + phom --> pi + thr-L                        | Amino Acid Metabolism | 320                | ThrC      | EC-4.2.3.1             |
| 116 | THRTRS       | Threonyl-tRNA synthetase                           | [c] : atp + thr-L + trnathr --> amp + ppi + thrtrna    | Amino Acid Metabolism | 197                | ThrS      | EC-6.1.1.3             |
| 117 | TRPS1        | tryptophan synthase (indoleglycerol phosphate)     | [c] : 3ig3p + ser-L --> g3p + h2o + trp-L              | Amino Acid Metabolism | 379, 287, 380      | TrpA+TrpB | EC-4.2.1.20            |
| 118 | TRPTRS       | Tryptophanyl-tRNA synthetase                       | [c] : atp + trnatrp + trp-L --> amp + ppi + trptrna    | Amino Acid Metabolism | 352                | TrpS      | EC-6.1.1.2             |
| 119 | TYRTA        | tyrosine transaminase                              | [c] : akg + tyr-L <==> 34hpp + glu-L                   | Amino Acid Metabolism | 231                | HisC      | EC-2.6.1.5             |
| 120 | TYRTRS       | Tyrosyl-tRNA synthetase                            | [c] : atp + trnatyr + tyr-L --> amp + ppi + tyrtrna    | Amino Acid Metabolism | 147                | TyrS      | EC-6.1.1.1             |
| 121 | VALTA        | valine transaminase                                | [c] : akg + val-L <==> 3mob + glu-L                    | Amino Acid Metabolism | 5                  | IlvE      | EC-2.6.1.42            |

| No  | Abbreviation      | Name                                              | Equation                                            | Subsystem                  | Model gene number  | Protein   | Protein Classification |
|-----|-------------------|---------------------------------------------------|-----------------------------------------------------|----------------------------|--------------------|-----------|------------------------|
| 122 | VALTRS            | Valyl-tRNA synthetase                             | [c] : atp + trnaval + val-L --> amp + ppi + valtrna | Amino Acid Metabolism      | 85                 | ValS      | EC-6.1.1.9             |
| 123 | ABTA              | 4-aminobutyrate transaminase                      | [c] : 4abut + akg --> glu-L + sucsal                | Carbohydrate Metabolism    | 333                | GabT      | EC-2.6.1.19            |
| 124 | ACS               | acetyl-CoA synthetase                             | [c] : ac + atp + coa --> accoa + amp + ppi          | Carbohydrate Metabolism    | 323                | Acs       | EC-6.2.1.1             |
| 125 | GALU              | UTP-glucose-1-phosphate uridylyltransferase       | [c] : g1p + h + utp <==> ppi + udpg                 | Carbohydrate Metabolism    | 121, 122           | GalF      | EC-2.7.7.9             |
| 126 | PPCOAC            | Propionyl-CoA carboxylase                         | [c] : atp + hco3 + ppcoa --> adp + h + mmcoa-S + pi | Carbohydrate Metabolism    | 92                 | YngE      | EC-6.4.1.3             |
| 127 | TGBPA             | Tagatose-bisphosphate aldolase                    | [c] : tagdp-D <==> dhap + g3p                       | Carbohydrate Metabolism    | 354                | AgaZ      | EC-4.1.2.40            |
| 128 | UDPG4E            | UDPglucose 4-epimerase                            | [c] : udpg <==> udpgal                              | Carbohydrate Metabolism    | 475, 426, 346, 476 | GalE      | EC-5.1.3.2             |
| 129 | XYLI2i            | xylose isomerase                                  | [c] : fru --> glc-D                                 | Carbohydrate Metabolism    | 299                | XylA      | EC-5.3.1.5             |
| 130 | G1PACT            | glucosamine-1-phosphate N-acetyltransferase       | [c] : accoa + gam1p --> acgam1p + coa + h           | Cell Envelope Biosynthesis | 121, 122           | GlmU      | EC-2.3.1.157           |
| 131 | GF6PTA            | glutamine-fructose-6-phosphate transaminase       | [c] : f6p + gln-L --> gam6p + glu-L                 | Cell Envelope Biosynthesis | 123                | GlmS      | EC-2.6.1.16            |
| 132 | GLCS1             | glycogen synthase (ADPGlc)                        | [c] : adpglc --> adp + glycogen + h                 | Cell Envelope Biosynthesis | 284, 280           | GlgA1     | EC-2.4.1.21            |
| 133 | GLGC              | glucose-1-phosphate adenylyltransferase           | [c] : atp + g1p + h --> adpglc + ppi                | Cell Envelope Biosynthesis | 215, 322, 89, 481  | GlgC      | EC-2.7.7.27            |
| 134 | LPADSS            | Lipid A disaccaride synthase                      | [c] : lipidX + u23ga --> h + lipidAds + udp         | Cell Envelope Biosynthesis | 176                | LpxB      | EC-2.4.1.182           |
| 135 | PGAMT             | phosphoglucosamine mutase                         | [c] : gam1p <==> gam6p                              | Cell Envelope Biosynthesis | 114, 120           | GlmM      | EC-5.4.2.10            |
| 136 | UAGCVT            | UDP-N-acetylglucosamine 1-carboxyvinyltransferase | [c] : pep + uacgam --> pi + uaccg                   | Cell Envelope Biosynthesis | 312                | MurAA     | EC-2.5.1.7             |
| 137 | UAGDP             | UDP-N-acetylglucosamine diphosphorylase           | [c] : acgam1p + h + utp --> ppi + uacgam            | Cell Envelope Biosynthesis | 121, 122           | GlmU      | EC-2.7.7.23            |
| 138 | UAPGR             | UDP-N-acetylenolpyruvoylglucosamine reductase     | [c] : h + nadph + uaccg --> nadp + uamr             | Cell Envelope Biosynthesis | 154                | MurB      | EC-1.1.1.158           |
| 139 | ACONT             | aconitase                                         | [c] : cit <==> icit                                 | Citrate Cycle (TCA)        | 219+218+94+93      | Aco3      | EC-4.2.1.3             |
| 140 | FUM               | fumarase                                          | [c] : fum + h2o <==> mal-L                          | Citrate Cycle (TCA)        | 98, 97             | TtdA+FumB | EC-4.2.1.2             |
| 141 | ICDH <sub>y</sub> | isocitrate dehydrogenase (NADP)                   | [c] : icit + nadp <==> akg + co2 + nadph            | Citrate Cycle (TCA)        | 95                 | Icd       | EC-1.1.1.42            |

| No  | Abbreviation | Name                                                  | Equation                                                                                          | Subsystem                                  | Model gene number | Protein    | Protein Classification |
|-----|--------------|-------------------------------------------------------|---------------------------------------------------------------------------------------------------|--------------------------------------------|-------------------|------------|------------------------|
| 142 | MDH          | malate dehydrogenase                                  | [c] : mal-L + nad <==> h + nadh + oaa                                                             | Citrate Cycle (TCA)                        | 96                | Mdh        | EC-1.1.1.37            |
| 143 | MICITH       | 2-methylisocitrate hydratase                          | [c] : 2mcacn + h2o --> micit                                                                      | Citrate Cycle (TCA)                        | 219+218+94+93     | Aco3       | EC-4.2.1.99            |
| 144 | OOR2r        | 2-oxoglutarate synthase                               | [c] : akg + coa + (2) fdox <==> co2 + (2) fdred + h + succoa                                      | Citrate Cycle (TCA)                        | 181+182+183+184   | Ofo        | EC-1.2.7.3             |
| 145 | POR2         | pyruvate synthase                                     | [c] : coa + (2) fdox + pyr <==> accoa + co2 + (2) fdred + h                                       | Citrate Cycle (TCA)                        | 181+182+183+184   | Pfor       | EC-1.2.7.1             |
| 146 | ACBIPGT      | Adenosyl cobainamide GTP transferase                  | [c] : adcobap + gtp + h --> adgcoba + ppi                                                         | Cofactor and Prosthetic Group Biosynthesis | 169               | CobU       |                        |
| 147 | ADCL         | 4-aminobenzoate synthase                              | [c] : 4adcho --> 4abz + h + pyr                                                                   | Cofactor and Prosthetic Group Biosynthesis | 373               | PabABC     |                        |
| 148 | ADCOBAK      | Adenosyl cobinamide kinase                            | [c] : adcoba + atp --> adcobap + adp + h                                                          | Cofactor and Prosthetic Group Biosynthesis | 169               | CobU       |                        |
| 149 | ADCOBAS      | adenosylcobinamide-phosphate synthase                 | [c] : 1ap2ol + adcobhex --> adcoba + h2o                                                          | Cofactor and Prosthetic Group Biosynthesis | 430, 300, 164     | CbiB, CbiD |                        |
| 150 | ADCOBHEXS    | adenosylcobyric acid synthase                         | [c] : adcobdam + (4) atp + (4) gln-L + (4) h2o -> adcobhex + (4) adp + (4) glu-L + (4) h + (4) pi | Cofactor and Prosthetic Group Biosynthesis | 260               | CobQ       |                        |
| 151 | ADCPS2       | adenosylcobinamide-phosphate synthase                 | [c] : 1ap2olp + adcobhex + atp --> adcobap + adp + h + pi                                         | Cofactor and Prosthetic Group Biosynthesis | 430, 300, 164     | CbiD, CbiB |                        |
| 152 | ADCS         | 4-amino-4-deoxychorismate synthase                    | [c] : chor + gln-L --> 4adcho + glu-L                                                             | Cofactor and Prosthetic Group Biosynthesis | 373               | PabABC     |                        |
| 153 | AHMMPS       | 4-amino-5-hydroxymethyl-2-methylpyrimidine synthetase | [c] : air + h2o --> 4ahmmp + gcald + (0.5) o2 + pi                                                | Cofactor and Prosthetic Group Biosynthesis | 201               | ThiC       |                        |
| 154 | ALATA_D2     | D-alanine transaminase                                | [c] : ala-D + pydx5p --> pyam5p + pyr                                                             | Cofactor and Prosthetic Group Biosynthesis | 87                | GlyA       |                        |
| 155 | ALATA_L2     | alanine transaminase                                  | [c] : ala-L + pydx5p --> pyam5p + pyr                                                             | Cofactor and Prosthetic Group Biosynthesis | 87                | GlyA       |                        |
| 156 | AMAOT        | adenosylmethionine-8-amino-7-oxononoate transaminase  | [c] : 8aonn + amet <==> amob + dann                                                               | Cofactor and Prosthetic Group Biosynthesis | 333               | BioA       | EC-2.6.1.62            |

| No  | Abbreviation | Name                                                     | Equation                                                                                                                  | Subsystem                                  | Model gene number | Protein | Protein Classification |
|-----|--------------|----------------------------------------------------------|---------------------------------------------------------------------------------------------------------------------------|--------------------------------------------|-------------------|---------|------------------------|
| 157 | AMPMS        | 4-amino-2-methyl-5-phosphomethylpyrimidine synthetase    | [c] : air + h2o --> 4ampm + (2) for + (4) h                                                                               | Cofactor and Prosthetic Group Biosynthesis | 201               | ThiC    |                        |
| 158 | APRAUR       | 5-amino-6-(5-phosphoribosylamino)uracil reductase        | [c] : 5apru + h + nadph --> 5aprbu + nadp                                                                                 | Cofactor and Prosthetic Group Biosynthesis | 310               | RibD    | EC-1.1.1.193           |
| 159 | ASP1DC       | aspartate 1-decarboxylase                                | [c] : asp-L + h --> ala-B + co2                                                                                           | Cofactor and Prosthetic Group Biosynthesis | 210               | PanD    | EC-4.1.1.11            |
| 160 | BACCL        | biotin-[acetyl-CoA-carboxylase] ligase                   | [c] : atp + btn + h --> btamp + ppi                                                                                       | Cofactor and Prosthetic Group Biosynthesis | 235               | BirA    | EC-6.3.4.15            |
| 161 | BTS          | Biotin synthase                                          | [c] : dtbt + (2) s --> btn + h + h2s                                                                                      | Cofactor and Prosthetic Group Biosynthesis | 306               | BioBec  | EC-2.8.1.6             |
| 162 | CBIAT        | Cobinamide adenylyltransferase                           | [c] : atp + cbi + h2o <==> adcoba + pi + ppi                                                                              | Cofactor and Prosthetic Group Biosynthesis | 326, 301, 429     | CobA    | EC-2.5.1.17            |
| 163 | CBLATr       | cob(I)alamin adenosyltransferase                         | [c] : atp + cbl1 + h <==> adocbl + pppi                                                                                   | Cofactor and Prosthetic Group Biosynthesis | 326, 301, 429     | CobA    | EC-2.5.1.17            |
| 164 | CDPMEK       | 4-(cytidine 5'-diphospho)-2-C methyl-D-erythritol kinase | [c] : 4c2me + atp --> 2p4c2me + adp + h                                                                                   | Cofactor and Prosthetic Group Biosynthesis | 74                | IspE    |                        |
| 165 | COBPS        | cobalamin-5'-phosphate synthase                          | [c] : adgcoba + rdmbzi --> cobamcoa + gmp + h                                                                             | Cofactor and Prosthetic Group Biosynthesis | 167               | CobS    |                        |
| 166 | COBPS2       | cobalamin-5'-phosphate synthase                          | [c] : adgcoba + rdmbzi <==> adocbl + gmp + h                                                                              | Cofactor and Prosthetic Group Biosynthesis | 167               | CobS    |                        |
| 167 | CPC3MT       | precorrin-3B C17-methyltransferase                       | [c] : amet + copre3 + h --> ahcys + copre4                                                                                | Cofactor and Prosthetic Group Biosynthesis | 260               | CobQ    | EC-2.1.1.131           |
| 168 | CPPPGOAN2    | Oxygen Independent coproporphyrinogen-III oxidase        | [c] : (2) amet + cpppg3 + (4) fdox + (2) nadph --> (2) co2 + (2) dad-5 + (4) fdred + (2) h + (2) met-L + (2) nadp + pppg9 | Cofactor and Prosthetic Group Biosynthesis | 236               | HemN    |                        |
| 169 | CYRDAAT      | cob(I)yrinic acid a,c-diamide adenosyltransferase        | [c] : atp + co1dam + h --> adcobdam + pppi                                                                                | Cofactor and Prosthetic Group Biosynthesis | 326, 301, 429     | CobA    | EC-2.5.1.17            |

| No  | Abbreviation | Name                                                            | Equation                                                                                                | Subsystem                                  | Model gene number | Protein | Protein Classification |
|-----|--------------|-----------------------------------------------------------------|---------------------------------------------------------------------------------------------------------|--------------------------------------------|-------------------|---------|------------------------|
| 170 | CYRDAS       | Cob(II)yrinate a,c-diamide synthase (glutamine-hydrolysing)     | [c] : (4) atp + (2) cobrnt + (4) gln-L + (2) h2o --> (4) adp + (2) co2dam + (4) glu-L + (2) h + (2) ppi | Cofactor and Prosthetic Group Biosynthesis | 29                | CobB    |                        |
| 171 | DB4PS        | 3,4-Dihydroxy-2-butanone-4-phosphate                            | [c] : ru5p-D --> db4p + for + h                                                                         | Cofactor and Prosthetic Group Biosynthesis | 308               | RibA    |                        |
| 172 | DHFOR2       | dihydrofolate reductase                                         | [c] : dhf + nadp <==> fol + nadph                                                                       | Cofactor and Prosthetic Group Biosynthesis | 214               | DfrA    | EC-1.5.1.3             |
| 173 | DHFOR3       | dihydrofolate reductase                                         | [c] : fol + h + (2) nadph <==> (2) nadp + thf                                                           | Cofactor and Prosthetic Group Biosynthesis | 214               | DfrA    | EC-1.5.1.3             |
| 174 | DHFR         | dihydrofolate reductase                                         | [c] : dhf + h + nadph <==> nadp + thf                                                                   | Cofactor and Prosthetic Group Biosynthesis | 214               | DfrA    | EC-1.5.1.3             |
| 175 | DHFS         | dihydrofolate synthase                                          | [c] : atp + dhpt + glu-L --> adp + dhf + h + pi                                                         | Cofactor and Prosthetic Group Biosynthesis | 7                 | FolC    | EC-6.3.2.12            |
| 176 | DHNAOT       | 1,4-dihydroxy-2-naphthoate octaprenyltransferase                | [c] : dhna + nad + octdp --> 2dmmq8 + co2 + nadh + ppi                                                  | Cofactor and Prosthetic Group Biosynthesis | 73                | MenA    |                        |
| 177 | DHNPA        | dihydroneopterin aldolase                                       | [c] : dhnt --> 2ahhmp + gcald                                                                           | Cofactor and Prosthetic Group Biosynthesis | 401, 402          | FolB    | EC-4.1.2.25            |
| 178 | DHPPDA2      | diaminohydroxyphosphoribosylaminopyrimidine deaminase           | [c] : 25dhpp + h + h2o --> 5apru + nh4                                                                  | Cofactor and Prosthetic Group Biosynthesis | 310               | RibD    | EC-3.5.4.26            |
| 179 | DHPS1        | dihydropteroate synthase                                        | [c] : 2ahhmp + 4abz --> dhpt + h2o                                                                      | Cofactor and Prosthetic Group Biosynthesis | 401               | FolP    | EC-2.5.1.15            |
| 180 | DHPS3        | dihydropteroate synthase                                        | [c] : 2ahhmd + 4abz --> dhpt + ppi                                                                      | Cofactor and Prosthetic Group Biosynthesis | 401               | FolP    | EC-2.5.1.15            |
| 181 | DMPPS        | 1-hydroxy-2-methyl-2-(E)-butenyl 4-diphosphate reductase (dmpp) | [c] : h + h2mb4p + nadh --> dmpp + h2o + nad                                                            | Cofactor and Prosthetic Group Biosynthesis | 353               | LytB    |                        |
| 182 | DMQMT        | 3-Dimethylubiquinol 3-methyltransferase                         | [c] : 2omhmb1 + amet --> ahcys + h + ubq8h2                                                             | Cofactor and Prosthetic Group Biosynthesis | 371               | UbiG    |                        |



| No  | Abbreviation | Name                                            | Equation                                                        | Subsystem                                  | Model gene number | Protein | Protein Classification |
|-----|--------------|-------------------------------------------------|-----------------------------------------------------------------|--------------------------------------------|-------------------|---------|------------------------|
| 183 | DNMPPA       | Dihydroneopterin monophosphate dephosphorylase  | [c] : dhmp + h <sub>2</sub> o --> dhnt + pi                     | Cofactor and Prosthetic Group Biosynthesis | 125, 336, 312     | NtpA    |                        |
| 184 | DNTPPA       | Dihydroneopterin triphosphate pyrophosphatase   | [c] : ahdt + h <sub>2</sub> o --> dhmp + h + ppi                | Cofactor and Prosthetic Group Biosynthesis | 125, 336, 312     | NtpA    |                        |
| 185 | DPCOAK       | dephospho-CoA kinase                            | [c] : atp + dpcoa --> adp + coa + h                             | Cofactor and Prosthetic Group Biosynthesis | 345               | CoaE    | EC-2.7.1.24            |
| 186 | DPR          | 2-dehydropantoate 2-reductase                   | [c] : 2dhp + h + nadph --> nadp + pant-R                        | Cofactor and Prosthetic Group Biosynthesis | 221, 102          | YlbQ    | EC-1.1.1.169           |
| 187 | DXPRI        | 1-deoxy-D-xylulose-5-phosphate reductoisomerase | [c] : dxyl5p + h + nadph <=> 2me4p + nadp                       | Cofactor and Prosthetic Group Biosynthesis | 58                | Dxr     |                        |
| 188 | DXPS         | 1-deoxy-D-xylulose 5-phosphate synthase         | [c] : g3p + h + pyr --> co2 + dxyl5p                            | Cofactor and Prosthetic Group Biosynthesis | 195               | Dxs     |                        |
| 189 | FMNAT        | FMN adenylyltransferase                         | [c] : atp + fnm + h --> fad + ppi                               | Cofactor and Prosthetic Group Biosynthesis | 148               | RibF    | EC-2.7.7.2             |
| 190 | GTPCI        | GTP cyclohydrolase I                            | [c] : gtp + h <sub>2</sub> o --> ahdt + for + h                 | Cofactor and Prosthetic Group Biosynthesis | 319               | FolE    | EC-3.5.4.16            |
| 191 | GTPCII       | GTP cyclohydrolase II                           | [c] : gtp + (3) h <sub>2</sub> o --> 25dhpp + for + (2) h + ppi | Cofactor and Prosthetic Group Biosynthesis | 308               | RibA    | EC-3.5.4.25            |
| 192 | HMPK1        | hydroxymethylpyrimidine kinase (ATP)            | [c] : 4ahmmp + atp --> 4ampm + adp + h                          | Cofactor and Prosthetic Group Biosynthesis | 203               | ThiE    | EC-2.7.1.49            |
| 193 | HMPK2        | hydroxymethylpyrimidine kinase (CTP)            | [c] : 4ahmmp + ctp --> 4ampm + cdp + h                          | Cofactor and Prosthetic Group Biosynthesis | 203               | ThiE    | EC-2.7.1.49            |
| 194 | HMPK3        | hydroxymethylpyrimidine kinase (UTP)            | [c] : 4ahmmp + utp --> 4ampm + h + udp                          | Cofactor and Prosthetic Group Biosynthesis | 203               | ThiE    | EC-2.7.1.49            |
| 195 | HMPK4        | hydroxymethylpyrimidine kinase (GTP)            | [c] : 4ahmmp + gtp --> 4ampm + gdp + h                          | Cofactor and Prosthetic Group Biosynthesis | 203               | ThiE    | EC-2.7.1.49            |

| No  | Abbreviation | Name                                                               | Equation                                                       | Subsystem                                  | Model gene number | Protein    | Protein Classification |
|-----|--------------|--------------------------------------------------------------------|----------------------------------------------------------------|--------------------------------------------|-------------------|------------|------------------------|
| 196 | HPPK         | 2-amino-4-hydroxy-6-hydroxymethylidihydropteridine diphosphokinase | [c] : 2ahmp + atp --> 2ahmd + amp + h                          | Cofactor and Prosthetic Group Biosynthesis | 402               | FolK       | EC-2.7.6.3             |
| 197 | IPDPS        | 1-hydroxy-2-methyl-2-(E)-butenyl 4-diphosphate reductase (ipdp)    | [c] : h + h2mb4p + nadh --> h2o + ipdp + nad                   | Cofactor and Prosthetic Group Biosynthesis | 353               | LytB       |                        |
| 198 | MAN1PT1      | mannose-1-phosphate guanylyltransferase                            | [c] : gtp + h + man1p --> gdpman + ppi                         | Cofactor and Prosthetic Group Biosynthesis | 322, 481          | Mpg        | EC-2.7.7.13            |
| 199 | MECDPDH      | 2C-methyl-D-erythritol 2,4 cyclodiphosphate dehydratase            | [c] : 2mecdp + nadh --> h2mb4p + h2o + nad                     | Cofactor and Prosthetic Group Biosynthesis | 57                | IspG       |                        |
| 200 | MECDPS       | 2-C-methyl-D-erythritol 2,4-cyclodiphosphate synthase              | [c] : 2p4c2me --> 2mecdp + cmp                                 | Cofactor and Prosthetic Group Biosynthesis | 17                | IspF       |                        |
| 201 | MEPCT        | 2-C-methyl-D-erythritol 4-phosphate cytidyltransferase             | [c] : 2me4p + ctp + h --> 4c2me + ppi                          | Cofactor and Prosthetic Group Biosynthesis | 16                | IspD       |                        |
| 202 | MOHMT        | 3-methyl-2-oxobutanoate hydroxymethyltransferase                   | [c] : 3mob + h2o + mlthf --> 2dhp + thf                        | Cofactor and Prosthetic Group Biosynthesis | 211               | PanB       | EC-2.1.2.11            |
| 203 | MTHFC        | methenyltetrahydrofolate cyclohydrolase                            | [c] : h2o + methf <==> 10thf + h                               | Cofactor and Prosthetic Group Biosynthesis | 173, 175          | FoID , Fhs | EC-3.5.4.9             |
| 204 | MTHFD        | methylenetetrahydrofolate dehydrogenase (NADP)                     | [c] : mlthf + nadp <==> methf + nadph                          | Cofactor and Prosthetic Group Biosynthesis | 173, 175          | FoID , Fhs | EC-1.5.1.5             |
| 205 | NADK         | NAD kinase                                                         | [c] : atp + nad --> adp + h + nadp                             | Cofactor and Prosthetic Group Biosynthesis | 101               | NadK       | EC-2.7.1.23            |
| 206 | NADS1        | NAD synthase (nh4)                                                 | [c] : atp + dnad + nh4 --> amp + h + nad + ppi                 | Cofactor and Prosthetic Group Biosynthesis | 302               | NadE       | EC-6.3.1.5             |
| 207 | NADS2        | NAD(+) synthase (glutamine-hydrolyzing)                            | [c] : atp + dnad + gln-L + h2o --> amp + glu-L + h + nad + ppi | Cofactor and Prosthetic Group Biosynthesis | 289               | NadE2      | EC-6.3.5.1             |
| 208 | NMNATr       | nicotinamide-nucleotide adenyltransferase                          | [c] : atp + h + nmn <==> nad + ppi                             | Cofactor and Prosthetic Group Biosynthesis | 1                 | NadD       | EC-2.7.7.1             |

| No  | Abbreviation | Name                                                                  | Equation                                                                       | Subsystem                                  | Model gene number | Protein | Protein Classification |
|-----|--------------|-----------------------------------------------------------------------|--------------------------------------------------------------------------------|--------------------------------------------|-------------------|---------|------------------------|
| 209 | NNATr        | nicotinate-nucleotide adenylyltransferase                             | [c] : atp + h + nicrnt $\rightleftharpoons$ dnad + ppi                         | Cofactor and Prosthetic Group Biosynthesis | 1                 | NadD    | EC-2.7.7.18            |
| 210 | NNDMBRT      | nicotinate-nucleotide-dimethylbenzimidazole phosphoribosyltransferase | [c] : dmbzid + nicrnt $\rightarrow$ 5prdmzbz + h + nac                         | Cofactor and Prosthetic Group Biosynthesis | 166               | CobT    | EC-2.4.2.21            |
| 211 | NNDMBRT3     | nicotinate-nucleotide-dimethylbenzimidazole phosphoribosyltransferase | [c] : ribflv $\rightarrow$ dmbzid                                              | Cofactor and Prosthetic Group Biosynthesis | 166               | CobT    | EC-Undetermined        |
| 212 | NNDPR        | nicotinate-nucleotide diphosphorylase (carboxylating)                 | [c] : (2) h + prpp + quln $\rightarrow$ co2 + nicrnt + ppi                     | Cofactor and Prosthetic Group Biosynthesis | 360               | NadC1   | EC-2.4.2.19            |
| 213 | OHPHM        | R04988                                                                | [c] : 2ohph + amet $\rightarrow$ 2omph + ahcys + h                             | Cofactor and Prosthetic Group Biosynthesis | 371               | UbiG    |                        |
| 214 | OMBZLM       | 2-Octaprenyl-6-methoxybenzoquinol methylase                           | [c] : 2ombzl + amet $\rightarrow$ 2ommbzl + ahcys + h                          | Cofactor and Prosthetic Group Biosynthesis | 12, 71, 400, 70   | UbiE    |                        |
| 215 | PACCOAL      | phenylacetate-CoA ligase                                              | [c] : atp + coa + pheac $\rightarrow$ amp + phaccoa + ppi                      | Cofactor and Prosthetic Group Biosynthesis | 285, 262          | PaaK    | EC-6.2.1.30            |
| 216 | PANTS        | pantothenate synthase                                                 | [c] : ala-B + atp + pant-R $\rightarrow$ amp + h + pnto-R + ppi                | Cofactor and Prosthetic Group Biosynthesis | 212               | PanC    | EC-6.3.2.1             |
| 217 | PDX5PS       | Pyridoxine 5'-phosphate synthase                                      | [c] : dxyl5p + nad + phthr $\rightarrow$ co2 + h + (2) h2o + nadh + pdx5p + pi | Cofactor and Prosthetic Group Biosynthesis | 64                | PdxAJ   |                        |
| 218 | PMDPHT       | pyrimidine phosphatase                                                | [c] : 5aprbu + h2o $\rightarrow$ 4r5au + pi                                    | Cofactor and Prosthetic Group Biosynthesis | 361               | Pmdpht  |                        |
| 219 | PNTEH        | Hydrolase Class ( RXN R02973)                                         | [c] : h2o + ptth $\rightarrow$ cysam + pnto-R                                  | Cofactor and Prosthetic Group Biosynthesis | 127               | Phyd    |                        |
| 220 | PNTK         | pantothenate kinase                                                   | [c] : atp + pnto-R $\rightarrow$ 4ppan + adp + h                               | Cofactor and Prosthetic Group Biosynthesis | 83                | CoaA    | EC-2.7.1.33            |

| No  | Abbreviation | Name                                      | Equation                                            | Subsystem                                  | Model gene number | Protein | Protein Classification |
|-----|--------------|-------------------------------------------|-----------------------------------------------------|--------------------------------------------|-------------------|---------|------------------------|
| 221 | PPCDC        | phosphopantothenoylcysteine decarboxylase | [c] : 4ppcys + h --> co2 + pan4p                    | Cofactor and Prosthetic Group Biosynthesis | 84                | Dfp     | EC-4.1.1.36            |
| 222 | PPNCL        | phosphopantothenate-cysteine ligase       | [c] : 4ppan + ctp + cys-L --> 4ppcys + cdp + h + pi | Cofactor and Prosthetic Group Biosynthesis | 84                | Dfp     | EC-6.3.2.5             |
| 223 | PTHPS        | 6-pyruvoyltetrahydropterin synthase       | [c] : ahdt --> 6pthp + pppi                         | Cofactor and Prosthetic Group Biosynthesis | 403               | Ptps    | EC-4.2.3.12            |
| 224 | PTPAT        | pantetheine-phosphate adenylyltransferase | [c] : atp + h + pan4p <==> dpcoa + ppi              | Cofactor and Prosthetic Group Biosynthesis | 43                | CoaD    | EC-2.7.7.3             |
| 225 | PYAM5PO      | pyridoxamine-phosphate oxidase            | [c] : h2o + o2 + pyam5p --> h2o2 + nh4 + pydx5p     | Cofactor and Prosthetic Group Biosynthesis | 418               | PdxHec  | EC-1.4.3.5             |
| 226 | QULNS        | quinolinate synthase                      | [c] : dhap + iasp --> (2) h2o + pi + quln           | Cofactor and Prosthetic Group Biosynthesis | 399               | NadA    |                        |
| 227 | RBFK         | riboflavin kinase                         | [c] : atp + ribflv --> adp + fmn + h                | Cofactor and Prosthetic Group Biosynthesis | 148               | RibF    | EC-2.7.1.26            |
| 228 | RBFSa        | riboflavin synthase                       | [c] : 4r5au + db4p --> dmlz + (2) h2o + pi          | Cofactor and Prosthetic Group Biosynthesis | 307+309           | RibEH   | EC-2.5.1.9             |
| 229 | RBFSb        | riboflavin synthase                       | [c] : (2) dmlz --> 4r5au + ribflv                   | Cofactor and Prosthetic Group Biosynthesis | 307+309           | RibEH   | EC-2.5.1.9             |
| 230 | TMPKr        | thiamine-phosphate kinase                 | [c] : atp + thmmp <==> adp + thmpp                  | Cofactor and Prosthetic Group Biosynthesis | 69                | ThiL    | EC-2.7.4.16            |
| 231 | TMPPP        | thiamine-phosphate diphosphorylase        | [c] : 2mahmp + 4mpetz + h --> ppi + thmpp           | Cofactor and Prosthetic Group Biosynthesis | 203               | ThiE    | EC-2.5.1.3             |
| 232 | UDPDPs       | undecaprenyl-diphosphate synthase         | [c] : decdp + ipdp --> ppi + udcdp                  | Cofactor and Prosthetic Group Biosynthesis | 60                | UppS    | EC-2.5.1.31            |
| 233 | ADCOBHS      | Adenosylcobinamide hydrolase              | [c] : 1ap2ol + adcobhex <==> adcoba + h2o           | Cofactor and Prosthetic Group Biosynthesis | 413               | CbiZ    | EC-3.5.1               |

| No  | Abbreviation | Name                                          | Equation                                            | Subsystem                                  | Model gene number | Protein | Protein Classification |
|-----|--------------|-----------------------------------------------|-----------------------------------------------------|--------------------------------------------|-------------------|---------|------------------------|
| 234 | MAN1PT2      | mannose-1-phosphate guanylyltransferase (GDP) | [c] : gdp + h + man1p --> gdpman + pi               | Cofactor and Prosthetic Group Biosynthesis | 75                | ManC    | EC-2.7.7.22            |
| 235 | RBZP         | alpha-ribazole-5-phosphatase                  | [c] : 5prmbz + h2o --> pi + rdmbzi                  | Cofactor and Prosthetic Group Biosynthesis | 168               | CobC    | EC-Undetermined        |
| 236 | UPP3MT       | uroporphyrinogen methyltransferase            | [c] : (2) amet + uppg3 --> (2) ahcys + (2) h + shcl | Cofactor and Prosthetic Group Biosynthesis | 412               | HemD    | EC-2.1.1.107           |
| 237 | UPP3S        | uroporphyrinogen-III synthase                 | [c] : hmbil --> h2o + uppg3                         | Cofactor and Prosthetic Group Biosynthesis | 412               | HemD    | EC-4.2.1.75            |
| 238 | AHC          | adenosylhomocysteinase                        | [c] : ahcys + h2o <==> adn + hcys-L                 | Energy Metabolism                          | 116               | AhcY    | EC-3.3.1.1             |
| 239 | ALCD2x       | alcohol dehydrogenase (ethanol: NAD)          | [c] : etoh + nad <==> acald + h + nadh              | Energy Metabolism                          | 15, 27            | AdhC    | EC-1.1.1.1             |
| 240 | ALCD3        | alcohol dehydrogenase (propanol: NAD)         | [c] : nad + ppoh <==> h + nadh + ppal               | Energy Metabolism                          | 15, 27            | AdhC    | EC-1.1.1.1             |

| No  | Abbreviation | Name                                   | Equation                                                                                                                 | Subsystem         | Model gene number                                                                                                                                                                                                                                                                                                                                                                                                                                                                                                 | Protein   | Protein Classification |
|-----|--------------|----------------------------------------|--------------------------------------------------------------------------------------------------------------------------|-------------------|-------------------------------------------------------------------------------------------------------------------------------------------------------------------------------------------------------------------------------------------------------------------------------------------------------------------------------------------------------------------------------------------------------------------------------------------------------------------------------------------------------------------|-----------|------------------------|
| 241 | RDR1         | Chlorobenzene reductive dechlorination | $(8) \text{fdred}[c] + (4) \text{h}[c] + \text{hcb}[e] \rightarrow (4) \text{c}[e] + \text{dcb}[e] + (8) \text{fdox}[c]$ | Energy Metabolism | 519, 472, 527, 447, 523, 539, 499, 449, 506, 470, 468, 547, 452, 544, 538, 501, 540, 464, 50, 450, 520, 518, 440, 512, 522, 546, 442, 460, 444, 446, 482, 466, 508, 457, 462, 541, 542, 548, 549, 388, 41, 502, 521, 543, 545, 479, 515, 305, 510, 455, 537, 453, 51, 507, 304, 467, 514, 458, 443, 463, 535, 509, 532, 484, 486, 49, 469, 487, 505, 531, 534, 448, 511, 474, 461, 529, 427, 517, 471, 465, 40, 536, 425, 473, 478, 441, 533, 426, 445, 528, 516, 19, 439, 451, 513, 485, 530, 459, 456, 504, 503 | RdhA+RdhB |                        |

| No  | Abbreviation | Name                                  | Equation                                                                                                                       | Subsystem         | Model gene number                                                                                                                                                                                                                                                                                                                                                                                                                                                                                                 | Protein    | Protein Classification |
|-----|--------------|---------------------------------------|--------------------------------------------------------------------------------------------------------------------------------|-------------------|-------------------------------------------------------------------------------------------------------------------------------------------------------------------------------------------------------------------------------------------------------------------------------------------------------------------------------------------------------------------------------------------------------------------------------------------------------------------------------------------------------------------|------------|------------------------|
| 242 | RDR2         | Chloroethene reductive dechlorination | $(8) \text{fdred}[c] + (4) \text{h}[c] + \text{pce}[e] \rightarrow (4) \text{c}[e] + \text{etl}[e] + (8) \text{fdox}[c]$       | Energy Metabolism | 519, 472, 527, 447, 523, 539, 499, 449, 506, 470, 468, 547, 452, 544, 538, 501, 540, 464, 50, 450, 520, 518, 440, 512, 522, 546, 442, 460, 444, 446, 482, 466, 508, 457, 462, 541, 542, 548, 549, 388, 41, 502, 521, 543, 545, 479, 515, 305, 510, 455, 537, 453, 51, 507, 304, 467, 514, 458, 443, 463, 535, 509, 532, 484, 486, 49, 469, 487, 505, 531, 534, 448, 511, 474, 461, 529, 427, 517, 471, 465, 40, 536, 425, 473, 478, 441, 533, 426, 445, 528, 516, 19, 439, 451, 513, 485, 530, 459, 456, 504, 503 | RdhA+RdhB  |                        |
| 243 | CMLDC        | 4-carboxymuconolactone decarboxylase  | $[\text{c}] : 2\text{c}25\text{dho} + \text{h} \rightarrow 5\text{odhf}2\text{a} + \text{co}2$                                 | Energy Metabolism | 39                                                                                                                                                                                                                                                                                                                                                                                                                                                                                                                | PcaC2      | EC-4.1.1.44            |
| 244 | CODHr        | carbon-monoxide dehydrogenase         | $[\text{c}] : \text{co} + (2) \text{fdox} + \text{h}2\text{o} \rightleftharpoons \text{co}2 + (2) \text{fdred} + (2) \text{h}$ | Energy Metabolism | 171, 172, 170, 174                                                                                                                                                                                                                                                                                                                                                                                                                                                                                                | CooS       | EC-1.2.99.2            |
| 245 | DGK1         | deoxyguanylate kinase (dGMP:ATP)      | $[\text{c}] : \text{atp} + \text{dgmp} \rightleftharpoons \text{adp} + \text{dgdP}$                                            | Energy Metabolism | 9                                                                                                                                                                                                                                                                                                                                                                                                                                                                                                                 | Gmk        |                        |
| 246 | F1PK         | fructose-1-phosphate kinase           | $[\text{c}] : \text{atp} + \text{f}1\text{p} \rightarrow \text{adp} + \text{fdp} + \text{h}$                                   | Energy Metabolism | 355                                                                                                                                                                                                                                                                                                                                                                                                                                                                                                               | FruK       | EC-2.7.1.56            |
| 247 | FNOR2        | ferredoxin-NADP reductase             | $[\text{c}] : (2) \text{fdred} + \text{h} + \text{nadp} \rightleftharpoons (2) \text{fdox} + \text{nadph}$                     | Energy Metabolism | 11                                                                                                                                                                                                                                                                                                                                                                                                                                                                                                                | P_1.18.1.2 | EC-1.18.1.2            |
| 248 | FRHD         | Ferredoxin hydrogenase                | $(2) \text{fdox}[c] + \text{h}2[e] \rightleftharpoons (2) \text{fdred}[c] + (2) \text{h}[e]$                                   | Energy Metabolism | 23+20+22+21+483+150+240+246+245+238+239+44+47+488+243+187+37                                                                                                                                                                                                                                                                                                                                                                                                                                                      | Fdx, FrdH  | EC-1.12.7,             |

| No  | Abbreviation | Name                                                             | Equation                                                           | Subsystem         | Model gene number                                                                                              | Protein | Protein Classification |
|-----|--------------|------------------------------------------------------------------|--------------------------------------------------------------------|-------------------|----------------------------------------------------------------------------------------------------------------|---------|------------------------|
| 249 | G3PD1        | glycerol-3-phosphate dehydrogenase (NAD)                         | [c] : glyc3p + nad <=> dhap + h + nadh                             | Energy Metabolism | 363                                                                                                            | GpsA    | EC-1.1.1.94            |
| 250 | G3PD2        | glycerol-3-phosphate dehydrogenase (NADP)                        | [c] : glyc3p + nadp <=> dhap + h + nadph                           | Energy Metabolism | 363                                                                                                            | GpsA    | EC-1.1.1.94            |
| 251 | GK1          | guanylate kinase (GMP:ATP)                                       | [c] : atp + gmp <=> adp + gdp                                      | Energy Metabolism | 9                                                                                                              | Gmk     | EC-2.7.4.8             |
| 252 | GLUSx        | glutamate synthase (NADH <sub>2</sub> )                          | [c] : akgl + gln-L + h + nadh --> (2) glu-L + nad                  | Energy Metabolism | 298, 296                                                                                                       | GlhAB   | EC-1.4.1.14            |
| 253 | GLYOX        | hydroxyacylglutathione hydrolase                                 | [c] : h2o + lgt-S --> gthrd + h + lac-D                            | Energy Metabolism | 88, 205                                                                                                        | GloB    | EC-3.1.2.6             |
| 254 | HGR          | mercury(II) reductase                                            | [c] : hg2 + nadph <=> h + hg0 + nadp                               | Energy Metabolism | 188                                                                                                            | MerA    | EC-1.16.1.1            |
| 255 | IOR          | indolepyruvate ferredoxin oxidoreductase                         | [c] : coa + (2) fdox + indpyr <=> co2 + (2) fdred + h + indaccoa   | Energy Metabolism | 269+270                                                                                                        | IorAB1  | EC-Undetermined        |
| 256 | IOR2         | indolepyruvate ferredoxin oxidoreductase (phenylpyruvate)        | [c] : coa + (2) fdox + phpyr <=> co2 + (2) fdred + h + phaccoa     | Energy Metabolism | 269+270                                                                                                        | IorAB1  | EC-Undetermined        |
| 257 | IOR3         | indolepyruvate ferredoxin oxidoreductase (hydroxyphenylpyruvate) | [c] : 34hpp + coa + (2) fdox <=> 4hphaccoa + co2 + (2) fdred + h   | Energy Metabolism | 269+270                                                                                                        | IorAB1  |                        |
| 258 | MAN6PI       | mannose-6-phosphate isomerase                                    | [c] : man6p <=> f6p                                                | Energy Metabolism | 113                                                                                                            | ManA    | EC-5.3.1.8             |
| 259 | MGSA         | methylglyoxal synthase                                           | [c] : dhap --> mthglx + pi                                         | Energy Metabolism | 397, 30                                                                                                        | MgsA    | EC-4.2.3.3             |
| 260 | NADH4        | NADH dehydrogenase (Menaquinone 7 & no proton)                   | [c] : h + mqn7 + nadh --> mql7 + nad                               | Energy Metabolism | 149+249+259+254+255+256+251+252+258+257+253+250+242+241+243+393+394+396+391+392+395+91+186+185+187+37+35+36+38 | Nadhd5  | EC-1.6.5.3             |
| 261 | NADH6        | NADH dehydrogenase (ubiquinone-8 & 3.5 protons)                  | (4.5) h[c] + nadh[c] + ubq8[c] --> (3.5) h[e] + nad[c] + ubq8h2[c] | Energy Metabolism | 149+249+259+254+255+256+251+252+258+257+253+250+242+241+243+393+394+396+391+392+395+91+186+185+187+37+35+36+38 | Nadhd5  | EC-1.6.5.3,            |



| No  | Abbreviation | Name                                                     | Equation                                                                        | Subsystem                  | Model gene number                                                                                              | Protein | Protein Classification |
|-----|--------------|----------------------------------------------------------|---------------------------------------------------------------------------------|----------------------------|----------------------------------------------------------------------------------------------------------------|---------|------------------------|
| 262 | NADH7        | NADH dehydrogenase (menaquinone-8 & 2 protons)           | $(3) h[c] + mqn8[c] + nadh[c] \rightarrow (2) h[e] + mql8[c] + nad[c]$          | Energy Metabolism          | 149+249+259+254+255+256+251+252+258+257+253+250+242+241+243+393+394+396+391+392+395+91+186+185+187+37+35+36+38 | Nadh5   | EC-1.6.5.3,            |
| 263 | NADH8        | NADH dehydrogenase (demethylmenaquinone-8 & 2.8 protons) | $2dmmq8[c] + (3.8) h[c] + nadh[c] \rightarrow 2dmmql8[c] + (2.8) h[e] + nad[c]$ | Energy Metabolism          | 149+249+259+254+255+256+251+252+258+257+253+250+242+241+243+393+394+396+391+392+395+91+186+185+187+37+35+36+38 | Nadh5   | EC-1.6.5.3,            |
| 264 | NADPH12      | Quinone oxidoreductase                                   | $[c] : h + nadph + ubq8 \rightarrow nadp + ubq8h2$                              | Energy Metabolism          | 37+243+187                                                                                                     | Nadphd  | EC-1.6.5.5             |
| 265 | NTRIRx       | nitrite reductase (NADH)                                 | $[c] : (4) h + (3) nadh + no2 \rightarrow h2o + (3) nad + nh4oh$                | Energy Metabolism          | 296                                                                                                            | NasDE   | EC-1.7.1.4             |
| 266 | NTRIRy       | nitrite reductase (NADPH)                                | $[c] : (4) h + (3) nadph + no2 \rightarrow h2o + (3) nadp + nh4oh$              | Energy Metabolism          | 296                                                                                                            | NasDE   | EC-1.7.1.4             |
| 267 | OXAD2        | Oxaloacetate decarboxylase                               | $[c] : h + oaa \rightarrow co2 + pyr$                                           | Energy Metabolism          | 24                                                                                                             | OadD    | EC-4.1.1.3             |
| 268 | PC           | pyruvate carboxylase                                     | $[c] : atp + hco3 + pyr \rightarrow adp + h + oaa + pi$                         | Energy Metabolism          | 24+25                                                                                                          | Pyc     | EC-6.4.1.1             |
| 269 | PFK          | phosphofructokinase                                      | $[c] : atp + f6p \rightarrow adp + fdp + h$                                     | Energy Metabolism          | 355                                                                                                            | PfkB    | EC-2.7.1.11            |
| 270 | PFK_2        | Phosphofructokinase                                      | $[c] : atp + tag6p-D \rightarrow adp + h + tagdp-D$                             | Energy Metabolism          | 355                                                                                                            | PfkB    | EC-2.7.1.11            |
| 271 | PGMT         | phosphoglucomutase                                       | $[c] : g1p \rightleftharpoons g6p$                                              | Energy Metabolism          | 120, 114                                                                                                       | Pmgm1   | EC-5.4.2.2             |
| 272 | PMANM        | phosphomannomutase                                       | $[c] : man1p \rightleftharpoons man6p$                                          | Energy Metabolism          | 120, 114                                                                                                       | Pmgm1   | EC-5.4.2.8             |
| 273 | PPA          | inorganic diphosphatase                                  | $[c] : h2o + ppi \rightarrow h + (2) pi$                                        | Energy Metabolism          | 55                                                                                                             | Ppa     | EC-3.6.1.1             |
| 274 | RBK          | ribokinase                                               | $[c] : atp + rib-D \rightarrow adp + h + r5p$                                   | Energy Metabolism          | 178                                                                                                            | RbsK    | EC-2.7.1.15            |
| 275 | TRDR         | thioredoxin reductase (NADPH)                            | $[c] : h + nadph + trdox \rightarrow nadp + trdrd$                              | Energy Metabolism          | 126                                                                                                            | TrxB    | EC-1.8.1.9             |
| 276 | ENO          | enolase                                                  | $[c] : 2pg \rightleftharpoons h2o + pep$                                        | Glycolysis/Gluconeogenesis | 144                                                                                                            | Eno     | EC-4.2.1.11            |
| 277 | FBA          | fructose-bisphosphate aldolase                           | $[c] : fdp \rightleftharpoons dhap + g3p$                                       | Glycolysis/Gluconeogenesis | 354                                                                                                            | Fba     | EC-4.1.2.13            |
| 278 | FBP          | fructose-bisphosphatase                                  | $[c] : fdp + h2o \rightarrow f6p + pi$                                          | Glycolysis/Gluconeogenesis | 327                                                                                                            | Fbp     | EC-3.1.3.11            |

| No  | Abbreviation | Name                                                                                           | Equation                                           | Subsystem                  | Model gene number | Protein    | Protein Classification |
|-----|--------------|------------------------------------------------------------------------------------------------|----------------------------------------------------|----------------------------|-------------------|------------|------------------------|
| 279 | GAPD         | glyceraldehyde-3-phosphate dehydrogenase (NAD)                                                 | [c] : g3p + nad + pi <=> 13dpg + h + nadh          | Glycolysis/Gluconeogenesis | 143               | Gap        | EC-1.2.1.12            |
| 280 | HEX1         | hexokinase (D-glucose:ATP)                                                                     | [c] : atp + glc-D --> adp + g6p + h                | Glycolysis/Gluconeogenesis | 13                | GlcK       | EC-2.7.1.2             |
| 281 | LDH_L        | L-lactate dehydrogenase                                                                        | [c] : lac-L + nad <=> h + nadh + pyr               | Glycolysis/Gluconeogenesis | 96                | Ldh        | EC-1.1.1.27            |
| 282 | PDH          | pyruvate dehydrogenase                                                                         | [c] : coa + nad + pyr --> accoa + co2 + nadh       | Glycolysis/Gluconeogenesis | 183               | PdhAB      | EC-1.2.1.51            |
| 283 | PGI          | glucose-6-phosphate isomerase                                                                  | [c] : g6p <=> f6p                                  | Glycolysis/Gluconeogenesis | 113               | Pgi        | EC-5.3.1.9             |
| 284 | PGK          | phosphoglycerate kinase                                                                        | [c] : 13dpg + adp <=> 3pg + atp                    | Glycolysis/Gluconeogenesis | 194               | Pgk        | EC-2.7.2.3             |
| 285 | PGM          | phosphoglycerate mutase                                                                        | [c] : 3pg <=> 2pg                                  | Glycolysis/Gluconeogenesis | 372, 408, 193     | Pgml, GpmA | EC-5.4.2.1             |
| 286 | PPDK         | pyruvate phosphate dikinase                                                                    | [c] : atp + pi + pyr --> amp + h + pep + ppi       | Glycolysis/Gluconeogenesis | 129               | PpdK       | EC-2.7.9.1             |
| 287 | PPS          | phosphoenolpyruvate synthase                                                                   | [c] : atp + h2o + pyr --> amp + (2) h + pep + pi   | Glycolysis/Gluconeogenesis | 129               | Ppsa       | EC-2.7.9.2             |
| 288 | PYK          | pyruvate kinase                                                                                | [c] : adp + h + pep --> atp + pyr                  | Glycolysis/Gluconeogenesis | 129               | Pyk        | EC-2.7.1.40            |
| 289 | TPI          | triose-phosphate isomerase                                                                     | [c] : dhap <=> g3p                                 | Glycolysis/Gluconeogenesis | 192               | TpiA       | EC-5.3.1.1             |
| 290 | AACPAT       | Acetyl-CoA:[acyl-carrier-protein] S-acetyltransferase                                          | [c] : ACP + accoa --> acACP + coa                  | Lipid Metabolism           | 274               | FabF       | EC-2.3.1.38            |
| 291 | ACCOAC       | acetyl-CoA carboxylase                                                                         | [c] : accoa + atp + hco3 --> adp + h + malcoa + pi | Lipid Metabolism           | 24+25             | AccC       | EC-6.4.1.2             |
| 292 | ACMAT1       | Acyl-[acyl-carrier-protein]:malonyl-[acyl-carrier-protein] C-acyltransferase (decarboxylating) | [c] : acACP + h + malACP --> ACP + actACP + co2    | Lipid Metabolism           | 274               | FabF       | EC-2.3.1.41            |
| 293 | ACPS1        | acyl-carrier protein synthase                                                                  | [c] : apoACP + coa --> ACP + h + pap               | Lipid Metabolism           | 90                | AcpS       | EC-2.7.8.7             |
| 294 | ALCD19       | alcohol dehydrogenase (glycerol)                                                               | [c] : glyald + h + nadh <=> glyc + nad             | Lipid Metabolism           | 15, 27            | AdhC       | EC-1.1.1.1             |
| 295 | ALDD8b       | aldehyde dehydrogenase (glyceraldehyde, NAD)                                                   | [c] : glyald + h2o + nad <=> glyc-R + (2) h + nadh | Lipid Metabolism           | 342               | AldH       | EC-1.2.1.3             |

| No  | Abbreviation   | Name                                                                | Equation                                         | Subsystem        | Model gene number | Protein | Protein Classification |
|-----|----------------|---------------------------------------------------------------------|--------------------------------------------------|------------------|-------------------|---------|------------------------|
| 296 | BTMAT1         | Butyryl-[acyl-carrier protein]:malonyl-CoA C-acyltransferase        | [c] : 2beACP + h + nadh --> butACP + nad         | Lipid Metabolism | 338               | FabI    | EC-1.3.1.10            |
| 297 | CDGPT          | CDPdiacylglycerol:sn-glycerol-3-phosphate 3-phosphatidyltransferase | [c] : cdpdag + glyc3p --> cmp + h + pglyp        | Lipid Metabolism | 279               | PgsA    |                        |
| 298 | CDPDSP         | CDPdiacylglycerol-serine O-phosphatidyltransferase                  | [c] : cdpdag + ser-L --> cmp + h + ps            | Lipid Metabolism | 279               | PssA1   | EC-2.7.8.8             |
| 299 | CLPNS          | cardiolipin synthetase                                              | [c] : cdpdag + pgly --> cdlp + cmp + h           | Lipid Metabolism | 279               | Clis    |                        |
| 300 | DAGK           | diacylglycerol kinase                                               | [c] : 12dgr + atp --> 12dag3p + adp + h          | Lipid Metabolism | 77                | DgkA    | EC-2.7.1.107           |
| 301 | DDMAT5         | Dodecanoyl-[acyl-carrier protein]: malonyl-CoA C-acyltransferase    | [c] : 2tddACP + h + nadh --> ddcaACP + nad       | Lipid Metabolism | 338               | FabI    | EC-1.3.1.10            |
| 302 | DEMAT4         | Decanoyl-[acyl-carrier protein]:malonyl-CoA C-acyltransferase       | [c] : 2tdeACP + h + nadh --> decACP + nad        | Lipid Metabolism | 338               | FabI    | EC-1.3.1.10            |
| 303 | DMATT          | dimethylallyltranstransferase                                       | [c] : dmpp + ipdp --> grdp + ppi                 | Lipid Metabolism | 67                | IspA    | EC-2.5.1.1             |
| 304 | FA120ACPH      | fatty-acyl-ACP hydrolase                                            | [c] : ddcaACP + h2o <==> ACP + ddca + h          | Lipid Metabolism | 339               | FatB    | EC-3.1.2.14            |
| 305 | FA140ACPH      | fatty-acyl-ACP hydrolase                                            | [c] : h2o + myrsACP <==> ACP + h + ttdca         | Lipid Metabolism | 339               | FatB    | EC-3.1.2.14            |
| 306 | FA160ACPH      | fatty-acyl-ACP hydrolase                                            | [c] : h2o + palmACP <==> ACP + h + hdca          | Lipid Metabolism | 339               | FatB    | EC-3.1.2.14            |
| 307 | FA180ACPH      | fatty-acyl-ACP hydrolase                                            | [c] : h2o + ocdACP <==> ACP + h + ocdca          | Lipid Metabolism | 339               | FatB    | EC-3.1.2.14            |
| 308 | FA200ACPH      | fatty-acyl-ACP hydrolase                                            | [c] : h2o + icsACP <==> ACP + h + icsa           | Lipid Metabolism | 339               | FatB    | EC-3.1.2.14            |
| 309 | FACOAL120      | fatty-acid--CoA ligase (dodecanoate)                                | [c] : atp + coa + ddca <==> amp + ddcoa + ppi    | Lipid Metabolism | 268, 286          | FadD    | EC-6.2.1.3             |
| 310 | FACOAL140      | fatty-acid--CoA ligase (tetradecanoate)                             | [c] : atp + coa + ttdca <==> amp + ppi + tdcoa   | Lipid Metabolism | 268, 286          | FadD    | EC-6.2.1.3             |
| 311 | FACOAL160      | fatty-acid--CoA ligase (hexadecanoate)                              | [c] : atp + coa + hdca <==> amp + pmtcoa + ppi   | Lipid Metabolism | 268, 286          | FadD    | EC-6.2.1.3             |
| 312 | FACOAL170(ISO) | fatty-acid--CoA ligase (Iso-C17:0)                                  | [c] : atp + coa + fa11 <==> amp + fa11coa + ppi  | Lipid Metabolism | 268, 286          | FadD    | EC-6.2.1.3             |
| 313 | FACOAL180      | fatty-acid--CoA ligase (octadecanoate)                              | [c] : atp + coa + ocdca <==> amp + ppi + strcoa  | Lipid Metabolism | 268, 286          | FadD    | EC-6.2.1.3             |
| 314 | FACOAL181      | fatty-acid--CoA ligase (octadecenoate)                              | [c] : atp + coa + ocdcea <==> amp + odecoa + ppi | Lipid Metabolism | 268, 286          | FadD    | EC-6.2.1.3             |

| No  | Abbreviation | Name                                                                | Equation                                       | Subsystem        | Model gene number | Protein | Protein Classification |
|-----|--------------|---------------------------------------------------------------------|------------------------------------------------|------------------|-------------------|---------|------------------------|
| 315 | FACOAL200    | fatty-acid--CoA ligase (icosanoate)                                 | [c] : atp + coa + icsa <==> amp + icscoa + ppi | Lipid Metabolism | 268, 286          | FadD    | EC-6.2.1.3             |
| 316 | FCLPA        | L-fuculose 1-phosphate aldolase                                     | [c] : fc1p <==> dhap + lald-L                  | Lipid Metabolism | 410               | FucA    | EC-4.1.2.17            |
| 317 | FRTT         | farnesyltranstransferase                                            | [c] : frdp + ipdp --> ggdp + ppi               | Lipid Metabolism | 67                | HepT    | EC-2.5.1.29            |
| 318 | GGTT         | geranylgeranyltranstransferase                                      | [c] : ggdp + ipdp --> pendp + ppi              | Lipid Metabolism | 67                | HepT    |                        |
| 319 | GRTT         | geranyltranstransferase                                             | [c] : grdp + ipdp --> frdp + ppi               | Lipid Metabolism | 67                | IspA    | EC-2.5.1.10            |
| 320 | HBUHL1       | (3R)-3-Hydroxybutanoyl-[acyl carrier-protein] hydro-lyase           | [c] : 3hbACP --> 2beACP + h2o                  | Lipid Metabolism | 339               | FabZ    | EC-4.2.1.58            |
| 321 | HBUR1        | (3R)-3-Hydroxybutanoyl-[acyl carrier protein]:NADP+ oxidoreductase  | [c] : actACP + h + nadph --> 3hbACP + nadp     | Lipid Metabolism | 340, 189          | FabG1   | EC-1.1.1.100           |
| 322 | HDDHL5       | (3R)-3-Hydroxybutanoyl-[acyl carrier-protein] hydro-lyase           | [c] : 3hddACP --> 2tddACP + h2o                | Lipid Metabolism | 339               | FabZ    | EC-4.2.1.58            |
| 323 | HDDR5        | 3R)-3-Hydroxydodecanoyl-[acyl-carrier-protein]:NADP+ oxidoreductase | [c] : 3oxddACP + h + nadph --> 3hddACP + nadp  | Lipid Metabolism | 340, 189          | FabG1   | EC-1.1.1.100           |
| 324 | HDEHL4       | (3R)-3-Hydroxybutanoyl-[acyl carrier-protein] hydro-lyase           | [c] : 3hdeACP --> 2tdeACP + h2o                | Lipid Metabolism | 339               | FabZ    | EC-4.2.1.58            |
| 325 | HDER4        | (3R)-3-Hydroxydecanoyl-[acyl-carrier-protein]:NADP+ oxidoreductase  | [c] : 3oxdeACP + h + nadph --> 3hdeACP + nadp  | Lipid Metabolism | 340, 189          | FabG1   | EC-1.1.1.100           |
| 326 | HDMAT7       | Hexadecanoyl-[acyl-carrier protein]:malonyl-CoA C-acyltransferase   | [c] : nad + palmACP <==> h + hdeACP + nadh     | Lipid Metabolism | 338               | FabI    | EC-1.3.1.10            |
| 327 | HEMAT2       | Hexanoyl-[acyl-carrier protein]:malonyl-CoA C-acyltransferase       | [c] : 2theACP + h + nadh --> hexACP + nad      | Lipid Metabolism | 338               | FabI    | EC-1.3.1.10            |
| 328 | HEPTT        | trans-heptaprenyltranstransferase                                   | [c] : hepdp + ipdp --> octdp + ppi             | Lipid Metabolism | 67                | HepT    |                        |

| No  | Abbreviation | Name                                                                   | Equation                                        | Subsystem        | Model gene number | Protein | Protein Classification |
|-----|--------------|------------------------------------------------------------------------|-------------------------------------------------|------------------|-------------------|---------|------------------------|
| 329 | HEXTT        | trans-hexaprenyltransferase                                            | [c] : hexdp + ipdp --> hepdp + ppi              | Lipid Metabolism | 67                | HepT    | EC-2.5.1.30            |
| 330 | HHDHL7       | (3R)-3-Hydroxypalmitoyl-[acyl-carrier-protein] hydro-lyase             | [c] : 3hpaACP --> h2o + hdeACP                  | Lipid Metabolism | 339               | FabZ    | EC-4.2.1.58            |
| 331 | HHDR7        | (3R)-3-Hydroxypalmitoyl-[acyl-carrier-protein]:NADP+ oxidoreductase    | [c] : 3oxhdACP + h + nadph --> 3hpaACP + nadp   | Lipid Metabolism | 340, 189          | FabG1   | EC-1.1.1.100           |
| 332 | HHYHL2       | (3R)-3-Hydroxybutanoyl-[acyl-carrier-protein] hydro-lyase              | [c] : 3hhACP --> 2theACP + h2o                  | Lipid Metabolism | 339               | FabZ    | EC-4.2.1.58            |
| 333 | HHYR2        | (3R)-3-Hydroxyhexanoyl-[acyl-carrier-protein]:NADP+ oxidoreductase     | [c] : 3oxhACP + h + nadph --> 3hhACP + nadp     | Lipid Metabolism | 340, 189          | FabG1   | EC-1.1.1.100           |
| 334 | HICHL9       | (3R)-3-Hydroxyicosanoyl-[acyl-carrier-protein] hydro-lyase             | [c] : 3hicsacp --> 2ticsacp + h2o               | Lipid Metabolism | 339               | FabZ    | EC-4.2.1.58            |
| 335 | HICR9        | (3R)-3-Hydroxyicosanoyl-[acyl-carrier-protein]:NADP+ oxidoreductase    | [c] : 3oxicsacp + h + nadph --> 3hicsacp + nadp | Lipid Metabolism | 340, 189          | FabG1   | EC-1.1.1.100           |
| 336 | HOCHL3       | ((3R)-3-Hydroxybutanoyl-[acyl-carrier-protein] hydro-lyase             | [c] : 3hocACP --> 2toceACP + h2o                | Lipid Metabolism | 339               | FabZ    | EC-4.2.1.58            |
| 337 | HOCHR3       | (3R)-3-Hydroxyoctanoyl-[acyl-carrier-protein]:NADP+ oxidoreductase     | [c] : 3oxocACP + h + nadph --> 3hocACP + nadp   | Lipid Metabolism | 340, 189          | FabG1   | EC-1.1.1.100           |
| 338 | HODHL8n      | (3R)-3-Hydroxyoctadecanoyl [acyl-carrier-protein] hydro-lyase          | [c] : 3hocdacp --> 2tocdACP + h2o               | Lipid Metabolism | 339               | FabZ    | EC-4.2.1.58            |
| 339 | HODR8_#1     | (3R)-3-Hydroxyoctadecanoyl [acyl-carrier-protein]:NADP+ oxidoreductase | [c] : 3oxocdacp + h + nadph --> 3hocdacp + nadp | Lipid Metabolism | 340, 189          | FabG1   | EC-1.1.1.100           |

| No  | Abbreviation | Name                                                                                               | Equation                                                                                            | Subsystem        | Model gene number | Protein | Protein Classification |
|-----|--------------|----------------------------------------------------------------------------------------------------|-----------------------------------------------------------------------------------------------------|------------------|-------------------|---------|------------------------|
| 340 | HTDHL6       | (3R)-3-Hydroxypalmitoyl-[acyl-carrier-protein] hydro-lyase                                         | [c] : 3htdACP --> h2o + tdeACP                                                                      | Lipid Metabolism | 339               | FabZ    | EC-4.2.1.58            |
| 341 | HTDR6        | 3R)-3-Hydroxytetradecanoyl-[acyl-carrier-protein]:NADP+ oxidoreductase                             | [c] : 3oxtdACP + h + nadph --> 3htdACP + nadp                                                       | Lipid Metabolism | 340, 189          | FabG1   | EC-1.1.1.100           |
| 342 | ICSMAT9      | Icosanoyl-[acyl-carrier protein]:malonyl-CoA C-acyltransferase                                     | [c] : 2ticsacp + h + nadh --> icsACP + nad                                                          | Lipid Metabolism | 338               | FabI    | EC-1.3.1.10            |
| 343 | KAS11        | b-ketoacyl synthetase (Iso-C17:0)                                                                  | [c] : (17) h + ivcoa + (6) malcoa + (12) nadph -> (6) co2 + (7) coa + fa11 + (5) h2o + (12) nadp    | Lipid Metabolism | 338               | FabI    | EC-2.3.1.41            |
| 344 | KAS17        | b-ketoacyl synthetase (n-C18:1)                                                                    | [c] : accoa + (22) h + (8) malcoa + (15) nadph --> (8) co2 + (9) coa + (7) h2o + (15) nadp + ocdcea | Lipid Metabolism | 338               | FabI    | EC-2.3.1.41            |
| 345 | MACPMT       | Malonyl-CoA:[acyl-carrier-protein] S-malonyltransferase                                            | [c] : ACP + malcoa --> coa + malACP                                                                 | Lipid Metabolism | 339               | FabD    | EC-2.3.1.39            |
| 346 | MCMAT2       | Butyryl-[acyl-carrier protein]:malonyl-[acyl-carrier-protein]C-acyltransferase (decarboxylating)   | [c] : butACP + h + malACP --> 3oxhACP + ACP + co2                                                   | Lipid Metabolism | 274               | FabF    | EC-2.3.1.41            |
| 347 | MCMAT3       | Hexanoyl-[acyl-carrier protein]:malonyl-[acyl-carrier-protein] C-acyltransferase                   | [c] : h + hexACP + malACP --> 3oxocACP + ACP + co2                                                  | Lipid Metabolism | 274               | FabF    | EC-2.3.1.41            |
| 348 | MCMAT4       | Octanoyl-[acyl-carrier protein]:malonyl-[acyl-carrier-protein] C-acyltransferase (decarboxylating) | [c] : h + malACP + octACP --> 3oxdeACP + ACP + co2                                                  | Lipid Metabolism | 274               | FabF    | EC-2.3.1.41            |
| 349 | MCMAT5       | Decanoyl-[acyl-carrier protein]:malonyl-[acyl-carrier-protein] C-acyltransferase                   | [c] : decACP + h + malACP --> 3oxddACP + ACP + co2                                                  | Lipid Metabolism | 274               | FabF    | EC-2.3.1.41            |

| No  | Abbreviation | Name                                                                                  | Equation                                             | Subsystem             | Model gene number | Protein | Protein Classification |
|-----|--------------|---------------------------------------------------------------------------------------|------------------------------------------------------|-----------------------|-------------------|---------|------------------------|
| 350 | MCMAT6       | Dodecanoyl-[acyl-carrier-protein]:malonyl-[acyl-carrier-protein] C-acyltransferase    | [c] : ddcaACP + h + malACP --> 3oxtdACP + ACP + co2  | Lipid Metabolism      | 274               | FabF    | EC-2.3.1.41            |
| 351 | MCMAT7       | Tetradecanoyl-[acyl-carrier-protein]:malonyl-[acyl-carrier-protein] C-acyltransferase | [c] : h + malACP + myrsACP --> 3oxhdACP + ACP + co2  | Lipid Metabolism      | 274               | FabF    | EC-2.3.1.41            |
| 352 | MCMAT8       | Hexadecanoyl-[acyl-carrier-protein]:malonyl-[acyl-carrier-protein] C-acyltransferase  | [c] : h + malACP + palmACP --> 3oxocdACP + ACP + co2 | Lipid Metabolism      | 274               | FabF    | EC-2.3.1.41            |
| 353 | MCMAT9       | Octadecanoyl-[acyl-carrier-protein]:malonyl-[acyl-carrier-protein] C-acyltransferase  | [c] : h + malACP + ocdACP --> 3oxicsACP + ACP + co2  | Lipid Metabolism      | 274               | FabF    | EC-2.3.1.41            |
| 354 | MPGSP        | Mannosyl-3-phosphoglycerate synthase                                                  | [c] : 3pg + gdpman + (2) h <==> 2m3pg + gdp          | Lipid Metabolism      | 356               | MpgSP   | EC-2.4.1.217           |
| 355 | OCDMAT8      | Octadecanoyl-[acyl-carrier-protein]:malonyl-CoA C-acyltransferase                     | [c] : 2tocdACP + h + nadh --> nad + ocdACP           | Lipid Metabolism      | 338               | FabI    | EC-1.3.1.10            |
| 356 | OCCMAT3      | Octanoyl-[acyl-carrier-protein]:malonyl-CoA C-acyltransferase                         | [c] : 2toceACP + h + nadh --> nad + octACP           | Lipid Metabolism      | 338               | FabI    | EC-1.3.1.10            |
| 357 | OCTT         | trans-octaprenyltranstransferase                                                      | [c] : ipdp + octdp --> nondp + ppi                   | Lipid Metabolism      | 67                | HepT    | EC-2.5.1.11            |
| 358 | PGPPH        | Phosphatidylglycerophosphate phosphohydrolase                                         | [c] : h2o + pglyp --> pgly + pi                      | Lipid Metabolism      | 361               | PgpA    | EC-3.1.3.27            |
| 359 | PHCYT        | phosphatidate cytidyltransferase                                                      | [c] : 12dag3p + ctp + h --> cdpdag + ppi             | Lipid Metabolism      | 59                | CdsA    | EC-2.7.7.41            |
| 360 | PPTT         | trans-pentaprenyltranstransferase                                                     | [c] : ipdp + pendp --> hexdp + ppi                   | Lipid Metabolism      | 67                | HepT    | EC-2.5.1.33            |
| 361 | TDMAT6       | Tetradecanoyl-[acyl-carrier-protein]:malonyl-CoA C-acyltransferase                    | [c] : myrsACP + nad <==> h + nadh + tdeACP           | Lipid Metabolism      | 338               | FabI    | EC-1.3.1.10            |
| 362 | ADD          | adenine deaminase                                                                     | [c] : ade + h + h2o --> hxan + nh4                   | Nucleotide Metabolism | 208               | AdeC    | EC-3.5.4.2             |
| 363 | ADK1         | adenylate kinase                                                                      | [c] : amp + atp <==> (2) adp                         | Nucleotide Metabolism | 111               | Adk     | EC-2.7.4.3             |

| No  | Abbreviation | Name                                                       | Equation                                                                  | Subsystem             | Model gene number | Protein    | Protein Classification |
|-----|--------------|------------------------------------------------------------|---------------------------------------------------------------------------|-----------------------|-------------------|------------|------------------------|
| 364 | ADK2         | adenylate kinase (Inorganic triphosphate)                  | [c] : amp + pppi <=> adp + ppi                                            | Nucleotide Metabolism | 111               | Adk        | EC-2.7.4.3             |
| 365 | ADK3         | guanylate kinase (aMP:gTP)                                 | [c] : amp + gtp <=> adp + gdp                                             | Nucleotide Metabolism | 111               | Adk        | EC-2.7.4.8             |
| 366 | ADK4         | adentylate kinase (ITP)                                    | [c] : amp + itp <=> adp + idp                                             | Nucleotide Metabolism | 111               | Adk        |                        |
| 367 | ADNCYC       | adenylate cyclase                                          | [c] : atp --> camp + ppi                                                  | Nucleotide Metabolism | 152               | CyaA       | EC-4.6.1.1             |
| 368 | ADNK1        | adenosine kinase                                           | [c] : adn + atp --> adp + amp + h                                         | Nucleotide Metabolism | 111               | Adk        | EC-2.7.1.20            |
| 369 | ADPRDP       | ADP-ribose diphosphatase                                   | [c] : adprib + h2o --> amp + (2) h + r5p                                  | Nucleotide Metabolism | 99                | NudF       | EC-3.6.1.13            |
| 370 | ADPT         | adenine phosphoribosyltransferase                          | [c] : ade + prpp --> amp + ppi                                            | Nucleotide Metabolism | 311               | Apt        | EC-2.4.2.7             |
| 371 | ADSL1        | adenylosuccinate lyase                                     | [c] : dcamp --> amp + fum                                                 | Nucleotide Metabolism | 228               | PurB       | EC-4.3.2.2             |
| 372 | ADSL2        | adenylosuccinate lyase                                     | [c] : 25aics --> aicar + fum                                              | Nucleotide Metabolism | 228               | PurB       | EC-4.3.2.2             |
| 373 | ADSS         | adenylosuccinate synthetase                                | [c] : asp-L + gtp + imp --> dcamp + gdp + (2) h + pi                      | Nucleotide Metabolism | 278               | PurA       | EC-6.3.4.4             |
| 374 | AICART       | phosphoribosylaminoimidazole carboxamide formyltransferase | [c] : 10thf + aicar <=> fprica + thf                                      | Nucleotide Metabolism | 369               | PurH       | EC-2.1.2.3             |
| 375 | AIRC         | phosphoribosylaminoimidazole carboxylase                   | [c] : air + co2 --> 5aizc + h                                             | Nucleotide Metabolism | 227               | PurE       | EC-4.1.1.21            |
| 376 | ASPCT        | aspartate carbamoyltransferase                             | [c] : asp-L + cbp --> cbasp + h + pi                                      | Nucleotide Metabolism | 314               | PyrB       | EC-2.1.3.2             |
| 377 | CBPSr        | carbamoyl-phosphate synthase (glutamine-hydrolysing)       | [c] : (2) atp + gln-L + h2o + hco3 <=> (2) adp + cbp + glu-L + (2) h + pi | Nucleotide Metabolism | 317+316           | CarAB      | EC-6.3.5.5             |
| 378 | CTPS1        | CTP synthase (NH3)                                         | [c] : atp + nh4 + utp --> adp + ctp + (2) h + pi                          | Nucleotide Metabolism | 366               | PyrG       | EC-6.3.4.2             |
| 379 | CTPS2        | CTP synthase (glutamine)                                   | [c] : atp + gln-L + h2o + utp --> adp + ctp + glu-L + (2) h + pi          | Nucleotide Metabolism | 366               | PyrG       | EC-6.3.4.2             |
| 380 | CYTK1        | cytidylate kinase (CMP)                                    | [c] : atp + cmp <=> adp + cdp                                             | Nucleotide Metabolism | 105               | Cmk        | EC-2.7.4.14            |
| 381 | CYTK2        | cytidylate kinase (dCMP)                                   | [c] : atp + dcmp <=> adp + dcdp                                           | Nucleotide Metabolism | 105               | Cmk        | EC-2.7.4.14            |
| 382 | DADK         | deoxyadenylate kinase                                      | [c] : atp + damp <=> adp + dadp                                           | Nucleotide Metabolism | 111               | Adk        | EC-2.7.4.11            |
| 383 | DCMPDA2ir    | dCMP deaminase                                             | [c] : dcmp + h + h2o --> dump + nh4                                       | Nucleotide Metabolism | 76                | ComEB      | EC-3.5.4.12            |
| 384 | DCMPDA3ir    | dCMP deaminase (CMP)                                       | [c] : cmp + h + h2o --> nh4 + ump                                         | Nucleotide Metabolism | 76                | ComEB      | EC-3.5.4.12            |
| 385 | DGTPH        | dGTPase                                                    | [c] : dgtp + h2o --> dgsn + pppi                                          | Nucleotide Metabolism | 128, 500          | Dgt        | EC-3.1.5.1             |
| 386 | DHORDf       | dihydroorotate dehydrogenase                               | [c] : dhor-S + (2) fdox <=> (2) fdred + (2) h + orot                      | Nucleotide Metabolism | 10, 318, 358      | PyrD, PyrK | EC-1.3.99.11           |
| 387 | DHORTS       | dihydroorotase                                             | [c] : dhor-S + h2o <=> cbasp + h                                          | Nucleotide Metabolism | 315               | PyrC       | EC-3.5.2.3             |
| 388 | DTMPK        | dTMP kinase                                                | [c] : atp + dtmp <=> adp + dtdp                                           | Nucleotide Metabolism | 202               | Tmk        | EC-2.7.4.9             |



| No  | Abbreviation | Name                                                  | Equation                                                          | Subsystem             | Model gene number | Protein | Protein Classification |
|-----|--------------|-------------------------------------------------------|-------------------------------------------------------------------|-----------------------|-------------------|---------|------------------------|
| 389 | DUTPDP       | dUTP diphosphatase                                    | [c] : dutp + h2o --> dump + h + ppi                               | Nucleotide Metabolism | 78                | Dutec   | EC-3.6.1.23            |
| 390 | FDTs         | Thymidylate synthase (FAD)                            | [c] : dump + fadh2 + mlthf --> dtmp + fad + thf                   | Nucleotide Metabolism | 381               | ThyX    | EC-Undetermined        |
| 391 | FTHFD        | formyltetrahydrofolate deformylase                    | [c] : 10fthf + h2o --> for + h + thf                              | Nucleotide Metabolism | 329               | PurUec  | EC-3.5.1.10            |
| 392 | G1PTMT       | glucose-1-phosphate thymidyltransferase               | [c] : dttp + g1p + h --> dtdpglc + ppi                            | Nucleotide Metabolism | 121, 122          | RfbA    | EC-2.7.7.24            |
| 393 | GARFT        | phosphoribosylglycinamide formyltransferase           | [c] : 10fthf + gar <==> fgam + h + thf                            | Nucleotide Metabolism | 179, 329          | PurN    | EC-2.1.2.2             |
| 394 | GLUPRT       | glutamine phosphoribosyl diphosphate amidotransferase | [c] : gln-L + h2o + prpp --> glu-L + ppi + pram                   | Nucleotide Metabolism | 367               | PurF    | EC-2.4.2.14            |
| 395 | GMPR         | GMP reductase                                         | [c] : gmp + (2) h + nadph --> imp + nadp + nh4                    | Nucleotide Metabolism | 65                | GuaC    | EC-1.7.1.7             |
| 396 | GMPS2        | GMP synthase (glutamine-hydrolysing)                  | [c] : atp + gln-L + h2o + xmp --> amp + glu-L + gmp + (2) h + ppi | Nucleotide Metabolism | 225               | GuaA    | EC-6.3.5.2             |
| 397 | GUAPRT       | guanine phosphoribosyltransferase                     | [c] : gua + prpp --> gmp + ppi                                    | Nucleotide Metabolism | 196, 209          | Hpt     |                        |
| 398 | HXPRT        | hypoxanthine phosphoribosyltransferase (Hypoxanthine) | [c] : hxan + prpp --> imp + ppi                                   | Nucleotide Metabolism | 196, 209          | Hpt     | EC-2.4.2.8             |
| 399 | IMPCir       | IMP cyclohydrolase                                    | [c] : fprica --> h2o + imp                                        | Nucleotide Metabolism | 369               | PurH    | EC-3.5.4.10            |
| 400 | IMPD         | IMP dehydrogenase                                     | [c] : h2o + imp + nad --> h + nadh + xmp                          | Nucleotide Metabolism | 65                | GuaB    | EC-1.1.1.205           |
| 401 | ITPASE       | dITP pyrophosphatase                                  | [c] : ditp + h2o --> dimp + ppi                                   | Nucleotide Metabolism | 328               | IxpP    | EC-Undetermined        |
| 402 | MTAP         | 5'-methylthioadenosine phosphorylase                  | [c] : 5mta + pi --> 5mdr1p + ade                                  | Nucleotide Metabolism | 117               | MtaP    | EC-2.4.2.28            |
| 403 | NAMNPP       | nicotinic acid mononucleotide pyrophosphorylase       | [c] : atp + h2o + nac + prpp --> adp + nicrnt + pi + ppi          | Nucleotide Metabolism | 370               | PncB    |                        |
| 404 | NCTPPRT      | nicotinate phosphoribosyltransferase                  | [c] : nicrnt + ppi <==> h + nac + prpp                            | Nucleotide Metabolism | 370               | PncB    | EC-2.4.2.11            |
| 405 | NDPK1        | nucleoside-diphosphate kinase (ATP:GDP)               | [c] : atp + gdp <==> adp + gtp                                    | Nucleotide Metabolism | 68                | Ndk     | EC-2.7.4.6             |
| 406 | NDPK2        | nucleoside-diphosphate kinase (ATP:UDP)               | [c] : atp + udp <==> adp + utp                                    | Nucleotide Metabolism | 68                | Ndk     | EC-2.7.4.6             |
| 407 | NDPK3        | nucleoside-diphosphate kinase (ATP:CDP)               | [c] : atp + cdp <==> adp + ctp                                    | Nucleotide Metabolism | 68                | Ndk     | EC-2.7.4.6             |

| No  | Abbreviation | Name                                                     | Equation                                            | Subsystem             | Model gene number | Protein | Protein Classification |
|-----|--------------|----------------------------------------------------------|-----------------------------------------------------|-----------------------|-------------------|---------|------------------------|
| 408 | NDPK4        | nucleoside-diphosphate kinase (ATP:dTDP)                 | [c] : atp + dtdp <=> adp + dttp                     | Nucleotide Metabolism | 68                | Ndk     | EC-2.7.4.6             |
| 409 | NDPK5        | nucleoside-diphosphate kinase (ATP:dGDP)                 | [c] : atp + dgdp <=> adp + dgtp                     | Nucleotide Metabolism | 68                | Ndk     | EC-2.7.4.6             |
| 410 | NDPK6        | nucleoside-diphosphate kinase (ATP:dUDP)                 | [c] : atp + dudp <=> adp + dutp                     | Nucleotide Metabolism | 68                | Ndk     | EC-2.7.4.6             |
| 411 | NDPK7        | nucleoside-diphosphate kinase (ATP:dCDP)                 | [c] : atp + dcdp <=> adp + dctp                     | Nucleotide Metabolism | 68                | Ndk     | EC-2.7.4.6             |
| 412 | NDPK8        | nucleoside-diphosphate kinase (ATP:dADP)                 | [c] : atp + dadp <=> adp + datp                     | Nucleotide Metabolism | 68                | Ndk     | EC-2.7.4.6             |
| 413 | NTPP1        | Nucleoside triphosphate pyrophosphorylase (dgtp)         | [c] : dgtp + h2o --> dgmp + h + ppi                 | Nucleotide Metabolism | 409               | MazG    |                        |
| 414 | NTPP2        | Nucleoside triphosphate pyrophosphorylase (gtp)          | [c] : gtp + h2o --> gmp + h + ppi                   | Nucleotide Metabolism | 409               | MazG    |                        |
| 415 | NTPP3        | dCTP diphosphatase                                       | [c] : dctp + h2o --> dcmp + h + ppi                 | Nucleotide Metabolism | 409               | MazG    | EC-3.6.1.12            |
| 416 | NTPP4        | Nucleoside triphosphate pyrophosphorylase (ctp)          | [c] : ctp + h2o --> cmp + h + ppi                   | Nucleotide Metabolism | 409               | MazG    |                        |
| 417 | NTPP5        | Nucleoside triphosphate pyrophosphorylase (datp)         | [c] : datp + h2o --> damp + h + ppi                 | Nucleotide Metabolism | 409               | MazG    |                        |
| 418 | NTPP6        | Nucleoside triphosphate pyrophosphorylase (atp)          | [c] : atp + h2o --> amp + h + ppi                   | Nucleotide Metabolism | 409               | MazG    |                        |
| 419 | NTPP7        | Nucleoside triphosphate pyrophosphorylase (dttp)         | [c] : dttp + h2o --> dtmp + h + ppi                 | Nucleotide Metabolism | 409               | MazG    |                        |
| 420 | NTPP8        | Nucleoside triphosphate pyrophosphorylase (utp)          | [c] : h2o + utp --> h + ppi + ump                   | Nucleotide Metabolism | 409               | MazG    |                        |
| 421 | NTPP2        | Nucleoside triphosphate tripolyhydrolase                 | [c] : gtp + h2o --> gsn + pppi                      | Nucleotide Metabolism | 128, 500          | Dgt     | EC-3.1.5.1             |
| 422 | OMPDC        | orotidine-5'-phosphate decarboxylase                     | [c] : h + orot5p --> co2 + ump                      | Nucleotide Metabolism | 6                 | PyrF    | EC-4.1.1.23            |
| 423 | ORPT         | orotate phosphoribosyltransferase                        | [c] : orot5p + ppi <=> orot + prpp                  | Nucleotide Metabolism | 311               | PyrE    | EC-2.4.2.10            |
| 424 | PRAGS        | phosphoribosylglycinamide synthetase                     | [c] : atp + gly + pram --> adp + gar + h + pi       | Nucleotide Metabolism | 226               | PurD    | EC-6.3.4.13            |
| 425 | PRAIS        | phosphoribosylaminoimidazole synthetase                  | [c] : atp + fpram --> adp + air + h + pi            | Nucleotide Metabolism | 368               | PurM    | EC-6.3.3.1             |
| 426 | PRASCS       | phosphoribosylaminoimidazole succinocarboxamide synthase | [c] : 5aizc + asp-L + atp <=> 25aics + adp + h + pi | Nucleotide Metabolism | 229               | PurC    | EC-6.3.2.6             |

| No  | Abbreviation | Name                                        | Equation                                                            | Subsystem             | Model gene number  | Protein    | Protein Classification |
|-----|--------------|---------------------------------------------|---------------------------------------------------------------------|-----------------------|--------------------|------------|------------------------|
| 427 | PRFGS        | phosphoribosylformylglycinamide synthase    | [c] : atp + fgam + gln-L + h2o --> adp + fpram + glu-L + (2) h + pi | Nucleotide Metabolism | 63, 62             | PurQ+PurL  | EC-6.3.5.3             |
| 428 | PRPPS        | phosphoribosylpyrophosphate synthetase      | [c] : atp + r5p <==> amp + h + prpp                                 | Nucleotide Metabolism | 86                 | Prs        | EC-2.7.6.1             |
| 429 | PSUDS        | pseudouridylate synthase                    | [c] : r5p + ura --> h2o + psd5p                                     | Nucleotide Metabolism | 359, 112, 207, 281 | RluB, RluD | EC-4.2.1.70            |
| 430 | RNDR1        | ribonucleoside-diphosphate reductase (ADP)  | [c] : adp + trdrp --> dadp + h2o + trdox                            | Nucleotide Metabolism | 428, 151, 52       | NrdEF      | EC-1.17.4.1            |
| 431 | RNDR2        | ribonucleoside-diphosphate reductase (GDP)  | [c] : gdp + trdrp --> dgdp + h2o + trdox                            | Nucleotide Metabolism | 428, 151, 52       | NrdEF      | EC-1.17.4.1            |
| 432 | RNDR3        | ribonucleoside-diphosphate reductase (CDP)  | [c] : cdp + trdrp --> dcdp + h2o + trdox                            | Nucleotide Metabolism | 428, 151, 52       | NrdEF      | EC-1.17.4.1            |
| 433 | RNDR4        | ribonucleoside-diphosphate reductase (UDP)  | [c] : trdrp + udp --> dudp + h2o + trdox                            | Nucleotide Metabolism | 428, 151, 52       | NrdEF      | EC-1.17.4.1            |
| 434 | RNTR1        | ribonucleoside-triphosphate reductase (ATP) | [c] : atp + trdrp --> datp + h2o + trdox                            | Nucleotide Metabolism | 52, 364            | NrdD       | EC-1.17.4.2            |
| 435 | RNTR2        | ribonucleoside-triphosphate reductase (GTP) | [c] : gtp + trdrp --> dgtp + h2o + trdox                            | Nucleotide Metabolism | 52, 364            | NrdD       | EC-1.17.4.2            |
| 436 | RNTR3        | ribonucleoside-triphosphate reductase (CTP) | [c] : ctp + trdrp --> dctp + h2o + trdox                            | Nucleotide Metabolism | 52, 364            | NrdD       | EC-1.17.4.2            |
| 437 | RNTR4        | ribonucleoside-triphosphate reductase (UTP) | [c] : trdrp + utp --> dutp + h2o + trdox                            | Nucleotide Metabolism | 52, 364            | NrdD       | EC-1.17.4.2            |
| 438 | TMDK1        | thymidine kinase (ATP:thymidine)            | [c] : atp + thymd --> adp + dtmp + h                                | Nucleotide Metabolism | 202                | Tmk        | EC-2.7.1.21            |
| 439 | TMDS         | thymidylate synthase                        | [c] : dump + mlthf --> dhf + dtmp                                   | Nucleotide Metabolism | 214                | ThyA       | EC-2.1.1.45            |
| 440 | UMPK         | UMP kinase                                  | [c] : atp + ump <==> adp + udp                                      | Nucleotide Metabolism | 105                | Cmk        |                        |
| 441 | UPPRT        | uracil phosphoribosyltransferase            | [c] : prpp + ura --> ppi + ump                                      | Nucleotide Metabolism | 313                | Upp2       | EC-2.4.2.9             |
| 442 | URIDK1       | uridylate kinase (UMP)                      | [c] : atp + ump --> adp + udp                                       | Nucleotide Metabolism | 61                 | PyrH       |                        |
| 443 | URIDK2       | uridylate kinase (dUMP)                     | [c] : atp + dump --> adp + dudp                                     | Nucleotide Metabolism | 61                 | PyrH       |                        |
| 444 | XTPASE       | XTP pyrophosphatase                         | [c] : h2o + xtp --> h + ppi + xmp                                   | Nucleotide Metabolism | 328                | IxpP       | EC-Undetermined        |

| No  | Abbreviation | Name                                                          | Equation                                                                  | Subsystem                 | Model gene number                      | Protein        | Protein Classification           |
|-----|--------------|---------------------------------------------------------------|---------------------------------------------------------------------------|---------------------------|----------------------------------------|----------------|----------------------------------|
| 445 | E4PD         | Erythrose 4-phosphate dehydrogenase                           | $[c] : e4p + h2o + nad \rightleftharpoons 4per + (2) h + nadh$            | Pentose Phosphate Pathway | 143                                    | Epd            |                                  |
| 446 | GTPDK        | GTP diphosphokinase                                           | $[c] : atp + gtp \rightarrow amp + gdptp + h$                             | Pentose Phosphate Pathway | 2                                      | RelA           | EC-2.7.6.5                       |
| 447 | RPE          | ribulose 5-phosphate 3-epimerase                              | $[c] : ru5p-D \rightleftharpoons xu5p-D$                                  | Pentose Phosphate Pathway | 158                                    | SgcE           | EC-5.1.3.1                       |
| 448 | RPI          | ribose-5-phosphate isomerase                                  | $[c] : r5p \rightleftharpoons ru5p-D$                                     | Pentose Phosphate Pathway | 159                                    | RpiB           | EC-5.3.1.6                       |
| 449 | TAL          | transaldolase                                                 | $[c] : g3p + s7p \rightleftharpoons e4p + f6p$                            | Pentose Phosphate Pathway | 365                                    | Tal            | EC-2.2.1.2                       |
| 450 | TKT1         | transketolase                                                 | $[c] : r5p + xu5p-D \rightleftharpoons g3p + s7p$                         | Pentose Phosphate Pathway | 160                                    | TktB           | EC-2.2.1.1                       |
| 451 | TKT2         | transketolase                                                 | $[c] : e4p + xu5p-D \rightleftharpoons f6p + g3p$                         | Pentose Phosphate Pathway | 160                                    | TktB           | EC-2.2.1.1                       |
| 452 | ANTIMt1      | antimonite transporter via uniport                            | $antim[c] \rightarrow antim[e]$                                           | Transport                 | 437                                    | ArsB2          | TC-2.A.59                        |
| 453 | ARSNAt1      | Arsenate transporter                                          | $arsna[c] \rightarrow arsna[e]$                                           | Transport                 | 437                                    | ArsB2          |                                  |
| 454 | ARSt1        | arsenite transporter via uniport                              | $arsni2[c] \rightarrow arsni2[e]$                                         | Transport                 | 437, 248                               | ArsB, ArsB2    |                                  |
| 455 | ATPS3r       | ATPase                                                        | $adp[c] + (3) h[e] + pi[c] \rightleftharpoons atp[c] + (2) h[c] + h2o[c]$ | Transport                 | 136+137+135+133+132+130+134+131        | AtpABCDEFGFHI  | EC-Undetermined, TC-Undetermined |
| 456 | CBL1abc      | Cob(1)alamin transport via ABC system                         | $atp[c] + cbl1[e] + h2o[c] \rightarrow adp[c] + cbl1[c] + h[c] + pi[c]$   | Transport                 | 525, 162, 431, 524, 161, 480, 526, 163 | BtuF+BtuD+BtuC |                                  |
| 457 | COBALt5      | cobalt transport in/out via permease (no H+)                  | $cobalt2[c] \rightleftharpoons cobalt2[e]$                                | Transport                 | 82, 142                                | CorA1          | TC-1.A.35                        |
| 458 | Cuabc        | Copper transport via ABC system                               | $atp[c] + cu2[e] + h2o[c] \rightarrow adp[c] + cu2[c] + h[c] + pi[c]$     | Transport                 | 271                                    | Cudp           | TC-3.A.3                         |
| 459 | FE2abc       | iron (II) transport via ABC system                            | $atp[c] + fe2[e] + h2o[c] \rightarrow adp[c] + fe2[c] + h[c] + pi[c]$     | Transport                 | 387                                    | FeoB1          |                                  |
| 460 | GLNabc       | L-glutamine transport via ABC system                          | $atp[c] + gln-L[e] + h2o[c] \rightarrow adp[c] + gln-L[c] + h[c] + pi[c]$ | Transport                 | 81, 80, 79                             | GlnP+GlnH+GlnQ | TC-3.A.1.3                       |
| 461 | GLYBt6       | betaine (glycine betaine) transport in/out via proton symport | $glyb[e] + h[e] \rightleftharpoons glyb[c] + h[c]$                        | Transport                 | 344                                    | ProPec         | TC-2.A.1.6                       |
| 462 | ILEabc       | L-isoleucine transport via ABC system                         | $atp[c] + h2o[c] + ile-L[e] \rightarrow adp[c] + h[c] + ile-L[c] + pi[c]$ | Transport                 | 261+265+266+263+264+267                | BraB, AzlCD    |                                  |
| 463 | Kt6          | potassium transport in/out via proton symport                 | $h[e] + k[e] \rightleftharpoons h[c] + k[c]$                              | Transport                 | 406, 180                               | KefC2, KefC    | TC-2.A.38                        |

| No  | Abbreviation | Name                                                         | Equation                                                                   | Subsystem | Model gene number                                     | Protein                  | Protein Classification |
|-----|--------------|--------------------------------------------------------------|----------------------------------------------------------------------------|-----------|-------------------------------------------------------|--------------------------|------------------------|
| 464 | LEUabc       | L-leucine transport via ABC system                           | $atp[c] + h_2o[c] + leu-L[e] \rightarrow adp[c] + h[c] + leu-L[c] + pi[c]$ | Transport | 261+265+266+263+264+267                               | AziCD, BraB              |                        |
| 465 | MGt5         | magnesium transport in/out via permease (no H <sup>+</sup> ) | $mg_2[c] \rightleftharpoons mg_2[e]$                                       | Transport | 82, 142                                               | CorA1                    | TC-1.A.35              |
| 466 | MNabc        | manganese transport via ABC system                           | $atp[c] + h_2o[c] + mn_2[e] \rightarrow adp[c] + h[c] + mn_2[c] + pi[c]$   | Transport | 156, 157, 155                                         | ZnuC+ZnuA+ZnuB           | TC-3.A.1.15            |
| 467 | NH4t         | ammonium transport via diffusion                             | $nh_4[e] \rightleftharpoons nh_4[c]$                                       | Transport | 291                                                   | AmtB                     |                        |
| 468 | NH4t3        | ammonium transport out via K <sup>+</sup> antiport           | $k[c] + nh_4[e] \rightarrow k[e] + nh_4[c]$                                | Transport | 291                                                   | AmtB                     | TC-2.A.49              |
| 469 | Nlabc        | nickel transport via ABC system                              | $atp[c] + h_2o[c] + ni_2[e] \rightarrow adp[c] + h[c] + ni_2[c] + pi[c]$   | Transport | 432, 386, 434, 384, 383, 435, 138, 436, 382, 433, 385 | NikA+NikC+NiKd+NikB+NikE |                        |
| 470 | Plabc        | phosphate transport via ABC system                           | $atp[c] + h_2o[c] + pi[e] \rightarrow adp[c] + h[c] + (2) pi[c]$           | Transport | 34+31+33+32                                           | PstABCS                  | TC-3.A.1.7             |
| 471 | Plt6         | phosphate transport in/out via proton symporter              | $h[e] + pi[e] \rightleftharpoons h[c] + pi[c]$                             | Transport | 8                                                     | PitA                     | TC-2.A.20              |
| 472 | PPA_1        | inorganic diphosphatase (one proton translocation)           | $h_2o[c] + ppi[c] \rightarrow h[e] + (2) pi[c]$                            | Transport | 200, 204                                              | Ppa1                     | EC-3.6.1.1, TC-3.A.10  |
| 473 | PROt6        | L-proline transport in/out via proton symport                | $h[e] + pro-L[e] \rightleftharpoons h[c] + pro-L[c]$                       | Transport | 344                                                   | ProPec                   | TC-2.A.3.1             |
| 474 | SULabc       | sulfate transport via ABC system                             | $atp[c] + h_2o[c] + so_4[e] \rightarrow adp[c] + h[c] + pi[c] + so_4[c]$   | Transport | 213                                                   | CysAP                    | TC-3.A.1.6             |
| 475 | TSULabc      | thiosulfate transport via ABC system                         | $atp[c] + h_2o[c] + tsul[e] \rightarrow adp[c] + h[c] + pi[c] + tsul[c]$   | Transport | 213                                                   | CysAP                    | TC-3.A.1.6             |
| 476 | VAlabc       | L-valine transport via ABC system                            | $atp[c] + h_2o[c] + val-L[e] \rightarrow adp[c] + h[c] + pi[c] + val-L[c]$ | Transport | 261+265+266+263+264+267                               | BraB, AziCD              |                        |
| 477 | ZN2abc2      | zinc transport in via ABC system                             | $atp[c] + h_2o[c] + zn_2[e] \rightarrow adp[c] + h[c] + pi[c] + zn_2[c]$   | Transport | 156, 157, 155                                         | ZnuC+ZnuA+ZnuB           | TC-3.A.1.15            |

**Table 10. List of Reactions of *i*AI549 Associated with Dispensable Genes (Dispensable Reactions)**

| No | Abbreviation | Name                                                   | Equation                                                                                 | Subsystem                                  | Gene | Protein | Protein Classification |
|----|--------------|--------------------------------------------------------|------------------------------------------------------------------------------------------|--------------------------------------------|------|---------|------------------------|
| 1  | ASPO1        | L-aspartate oxidase                                    | [c] : asp-L + nad --> (2) h + iasp + nadh                                                | Cofactor and Prosthetic Group Biosynthesis | 420  | NadB    |                        |
| 2  | ASPO3        | L-aspartate oxidase                                    | [c] : asp-L + ubq8 --> h + iasp + ubq8h2                                                 | Cofactor and Prosthetic Group Biosynthesis | 420  | NadB    |                        |
| 3  | ASPO4        | L-aspartate oxidase                                    | [c] : asp-L + mqn8 --> h + iasp + mql8                                                   | Cofactor and Prosthetic Group Biosynthesis | 420  | NadB    |                        |
| 4  | ASPO5        | L-aspartate oxidase                                    | [c] : asp-L + fum --> h + iasp + succ                                                    | Cofactor and Prosthetic Group Biosynthesis | 420  | NadB    |                        |
| 5  | ASPO6        | L-aspartate oxidase                                    | [c] : asp-L + o2 --> h + h2o2 + iasp                                                     | Cofactor and Prosthetic Group Biosynthesis | 420  | NadB    |                        |
| 6  | ORNCD        | ornithine cyclodeaminase                               | [c] : orn-L --> nh4 + pro-L                                                              | Cofactor and Prosthetic Group Biosynthesis | 414  | Ocd     | EC-4.3.1.12            |
| 7  | THZPSN       | thiazole phosphate synthesis                           | [c] : atp + cys-L + dxyl5p + tyr-L --> 4hba + 4mpetz + ala-L + amp + co2 + h + h2o + ppi | Cofactor and Prosthetic Group Biosynthesis | 417  | IscS    |                        |
| 8  | CPC6MT       | precorrin-6Y C5,15-methyltransferase (decarboxylating) | [c] : (2) amet + codhpre6 --> (2) ahcys + co2 + copre8 + h                               | Cofactor and Prosthetic Group Biosynthesis | 416  | CbiE    | EC-2.1.1.132           |
| 9  | PDX5PO       | pyridoxine 5'-phosphate oxidase                        | [c] : o2 + pdx5p <==> h + h2o2 + pydx5p                                                  | Cofactor and Prosthetic Group Biosynthesis | 418  | PdxHec  | EC-1.4.3.5             |
| 10 | PMPK         | phosphomethylpyrimidine kinase                         | [c] : 4ampm + atp --> 2mahmp + adp                                                       | Cofactor and Prosthetic Group Biosynthesis | 421  | ThiD    | EC-2.7.4.7             |
| 11 | HISTP        | histidinol-phosphatase                                 | [c] : h2o + hisp --> histd + pi                                                          | Amino Acid Metabolism                      | 425  | HisJ    | EC-3.1.3.15            |
| 12 | THRA         | threonine aldolase                                     | [c] : thr-L <==> acald + gly                                                             | Amino Acid Metabolism                      | 415  | LtaA    | EC-4.1.2.5             |
| 13 | THRLAD       | L-allo-threonine aldolase                              | [c] : thr-LA --> acald + gly                                                             | Amino Acid Metabolism                      | 415  | LtaA    |                        |
| 14 | SUCOAS       | succinyl-CoA synthetase (ADP-forming)                  | [c] : atp + coa + succ <==> adp + pi + succoa                                            | Citrate Cycle (TCA)                        | 419  | SucCD1  | EC-6.2.1.5             |

| No | Abbreviation | Name                                    | Equation                          | Subsystem                 | Gene | Protein | Protein Classification |
|----|--------------|-----------------------------------------|-----------------------------------|---------------------------|------|---------|------------------------|
| 15 | FRD5         | succinate dehydrogenase (menaquinone 7) | [c] : mqn7 + succ <==> fum + mql7 | Citrate Cycle (TCA)       | 420  | Frd     | EC-1.3.5.1             |
| 16 | PFLi         | pyruvate formate lyase                  | [c] : coa + pyr --> accoa + for   | Carbohydrate Metabolism   | 422  | PfIC    | EC-Undetermined        |
| 17 | S7PI         | sedoheptulose 7-phosphate isomerase     | [c] : s7p <==> gmh7p              | Pentose Phosphate Pathway | 424  | GmhA    |                        |
| 18 | OBTFL        | 2-Oxobutanoate formate lyase            | [c] : 2obut + coa --> for + ppcoa | Energy Metabolism         | 422  | PfIC    |                        |

**Table 11. List of Reactions of *i*AI549 Associated with Unique Genes (Unique Reactions)**

| No | Abbreviation | Name                               | Equation                                                                                                                                                                                              | Subsystem         | Gene                              | Protein | Protein Classification |
|----|--------------|------------------------------------|-------------------------------------------------------------------------------------------------------------------------------------------------------------------------------------------------------|-------------------|-----------------------------------|---------|------------------------|
| 1  | NITr         | nitrogenase                        | $[c] : (16) \text{atp} + (8) \text{fdred} + (16) \text{h}_2\text{o} + \text{n}_2 \rightleftharpoons (16) \text{adp} + (8) \text{fdox} + (6) \text{h} + \text{h}_2 + (2) \text{nh}_4 + (16) \text{pi}$ | Energy Metabolism | 495, 492, 493, 490, 489, 491, 494 | Nif     | EC-1.18.6.1            |
| 2  | MOBDabc      | molybdate transport via ABC system | $\text{atp}[c] + \text{h}_2\text{o}[c] + \text{mobd}[e] \rightarrow \text{adp}[c] + \text{h}[c] + \text{mobd}[c] + \text{pi}[c]$                                                                      | Transport         | 496+498+497                       | ModABC  | TC-3.A.1.8             |



**Table 12. Detailed List of Metabolites of *i*AI549**

| No | Abbreviation | Name                                                                    | Formula                                                                     | KEGG ID |
|----|--------------|-------------------------------------------------------------------------|-----------------------------------------------------------------------------|---------|
| 1  | 10fthf       | 10-Formyltetrahydrofolate                                               | C <sub>20</sub> H <sub>21</sub> N <sub>7</sub> O <sub>7</sub>               | C00234  |
| 2  | 12dag3p      | 1,2-Diacyl-sn-glycerol 3-phosphate                                      | C <sub>5</sub> H <sub>7</sub> O <sub>8</sub> PR <sub>2</sub>                | C00416  |
| 3  | 12dgr        | 1,2-Diacylglycerol                                                      | C <sub>5</sub> H <sub>6</sub> O <sub>5</sub> R <sub>2</sub>                 | C00641  |
| 4  | 13dpg        | 3-Phospho-D-glyceroyl phosphate                                         | C <sub>3</sub> H <sub>4</sub> O <sub>10</sub> P <sub>2</sub>                | C00236  |
| 5  | 1ap2ol       | 1-Aminopropan-2-ol                                                      | C <sub>3</sub> H <sub>9</sub> NO                                            | C05771  |
| 6  | 1ap2olp      | D-1-Aminopropan-2-ol O-phosphate                                        | C <sub>3</sub> H <sub>10</sub> NO <sub>4</sub> P                            | C04122  |
| 7  | 1pyr5c       | 1-Pyrroline-5-carboxylate                                               | C <sub>5</sub> H <sub>6</sub> NO <sub>2</sub>                               | C03912  |
| 8  | 23dhdp       | 2,3-Dihydrodipicolinate                                                 | C <sub>7</sub> H <sub>5</sub> NO <sub>4</sub>                               | C03340  |
| 9  | 23dhmb       | (R)-2,3-Dihydroxy-3-methylbutanoate                                     | C <sub>5</sub> H <sub>9</sub> O <sub>4</sub>                                | C04272  |
| 10 | 23dhmp       | (R)-2,3-Dihydroxy-3-methylpentanoate                                    | C <sub>6</sub> H <sub>11</sub> O <sub>4</sub>                               | C06007  |
| 11 | 25aics       | (S)-2-[5-Amino-1-(5-phospho-D-ribosyl)imidazole-4-carboxamido]succinate | C <sub>13</sub> H <sub>15</sub> N <sub>4</sub> O <sub>12</sub> P            | C04823  |
| 12 | 25dhpp       | 2,5-Diamino-6-hydroxy-4-(5'-phosphoribosylamino)-pyrimidine             | C <sub>9</sub> H <sub>16</sub> N <sub>5</sub> O <sub>8</sub> P              | C01304  |
| 13 | 26dap-LL     | LL-2,6-Diaminoheptanedioate                                             | C <sub>7</sub> H <sub>14</sub> N <sub>2</sub> O <sub>4</sub>                | C00666  |
| 14 | 26dap-M      | meso-2,6-Diaminoheptanedioate                                           | C <sub>7</sub> H <sub>14</sub> N <sub>2</sub> O <sub>4</sub>                | C00680  |
| 15 | 2ahbut       | (S)-2-Aceto-2-hydroxybutanoate                                          | C <sub>6</sub> H <sub>9</sub> O <sub>4</sub>                                | C06006  |
| 16 | 2ahhmd       | 2-Amino-4-hydroxy-6-hydroxymethyl-7,8-dihydropteridine diphosphate      | C <sub>7</sub> H <sub>11</sub> N <sub>5</sub> O <sub>8</sub> P <sub>2</sub> | C04807  |

| No | Abbreviation | Name                                                    | Formula        | KEGG ID |
|----|--------------|---------------------------------------------------------|----------------|---------|
| 17 | 2ahhmp       | 2-Amino-4-hydroxy-6-hydroxymethyl-7,8-dihydropteridine  | C7H9N5O2       | C01300  |
| 18 | 2beACP       | But-2-enoyl-[acyl-carrier protein]                      | C27H44O        | C04246  |
| 19 | 2c25dho      | 2-Carboxy-2,5-dihydro-5-oxofuran-2-acetate              | C7H6O6         | C01278  |
| 20 | 2cpr5p       | 1-(2-Carboxyphenylamino)-1-deoxy-D-ribulose 5-phosphate | C12H13NO9P     | C01302  |
| 21 | 2dda7p       | 2-Dehydro-3-deoxy-D-arabino-heptonate 7-phosphate       | C7H10O10P      | C04691  |
| 22 | 2dhp         | 2-Dehydropantoate                                       | C6H9O4         | C00966  |
| 23 | 2dmmq8       | 2-Demethylmenaquinone 8                                 | C50H70O2       | C05818  |
| 24 | 2dmmq8       | 2-Demethylmenaquinol 8                                  | C50H72O2       | 0       |
| 25 | 2ippm        | 2-Isopropylmaleate                                      | C7H8O4         | C02631  |
| 26 | 2m3pg        | 2-(alpha-D-Mannosyl)-3-phosphoglycerate                 | C9H17O12P      | C11516  |
| 27 | 2mahmp       | 2-Methyl-4-amino-5-hydroxymethylpyrimidine diphosphate  | C6H8N3O7P2     | C04752  |
| 28 | 2mbcoa       | 2-Methylbutanoyl-CoA                                    | C26H44N7O17P3S | C01033  |
| 29 | 2mcacn       | cis-2-Methylaconitate                                   | C7H5O6         | C04225  |
| 30 | 2me4p        | 2-C-methyl-D-erythritol 4-phosphate                     | C5H11O7P       | C11434  |
| 31 | 2mecdp       | 2-C-methyl-D-erythritol 2,4-cyclodiphosphate            | C5H10O9P2      | C11453  |

| No | Abbreviation | Name                                                        | Formula       | KEGG ID |
|----|--------------|-------------------------------------------------------------|---------------|---------|
| 32 | 2o3mpt       | (R)-2-Oxo-3-methylpentanoate                                | C6H10O3       | C06008  |
| 33 | 2obut        | 2-Oxobutanoate                                              | C4H5O3        | C00109  |
| 34 | 2ohph        | 2-Octaprenyl-6-hydroxyphenol                                | C46H70O2      | C05811  |
| 35 | 2ombzl       | 2-Octaprenyl-6-methoxy-1,4-benzoquinol                      | C47H72O3      | 0       |
| 36 | 2omhmb1      | 2-Octaprenyl-3-methyl-5-hydroxy-6-methoxy-1,4-benzoquinol   | C48H74O4      | 0       |
| 37 | 2ommb1       | 2-Octaprenyl-3-methyl-6-methoxy-1,4-benzoquinol             | C48H74O3      | 0       |
| 38 | 2omph        | 2-Octaprenyl-6-methoxyphenol                                | C47H72O2      | C05812  |
| 39 | 2p4c2me      | 2-phospho-4-(cytidine 5'-diphospho)-2-C-methyl-D-erythritol | C14H22N3O17P3 | 0       |
| 40 | 2pg          | D-Glycerate 2-phosphate                                     | C3H4O7P       | C00631  |
| 41 | 2tddACP      | trans-Dodec-2-enoyl-[acyl-carrier protein]                  | C12H21OSR     | C05758  |
| 42 | 2tdeACP      | trans-Dec-2-enoyl-[acyl-carrier protein]                    | C10H17OSR     | C05754  |
| 43 | 2theACP      | trans-Hex-2-enoyl-[acp]                                     | C6H9OSR       | C05748  |
| 44 | 2ticsacp     | trans-Icos-2-enoyl [acyl-carrier protein]                   | C20H37OX      | 0       |
| 45 | 2tocdACP     | trans-Octadec-2-enoyl-[acyl-carrier-protein]                | C18H33OSR     | C16221  |
| 46 | 2toceACP     | trans-Oct-2-enoyl-[acp]                                     | C8H13OSR      | C05751  |
| 47 | 34hpp        | 3-(4-Hydroxyphenyl)pyruvate                                 | C9H7O4        | C01179  |
| 48 | 36dahx       | (3S)-3,6-Diaminohexanoate                                   | C6H14N2O2     | C01142  |

| No | Abbreviation | Name                                              | Formula    | KEGG ID |
|----|--------------|---------------------------------------------------|------------|---------|
| 49 | 3c2hmp       | 3-Carboxy-2-hydroxy-4-methylpentanoate            | C7H10O5    | C04411  |
| 50 | 3c3hmp       | 3-Carboxy-3-hydroxy-4-methylpentanoate            | C7H10O5    | C02504  |
| 51 | 3c4mop       | 3-Carboxy-4-methyl-2-oxopentanoate                | C7H8O5     | C04236  |
| 52 | 3dhq         | 3-Dehydroquinate                                  | C7H9O6     | C00944  |
| 53 | 3dhsk        | 3-Dehydroshikimate                                | C7H7O5     | C02637  |
| 54 | 3fpyr        | 3-Fumarylpyruvate                                 | C7H6O6     | C02514  |
| 55 | 3hbACP       | (3R)-3-Hydroxybutanoyl-[acyl-carrier protein]     | C4H7O2SR   | C04618  |
| 56 | 3hddACP      | (R)-3-Hydroxydodecanoyl-[acyl-carrier protein]    | C12H23O2SR | C05757  |
| 57 | 3hdeACP      | (3R)-3-Hydroxydecanoyl-[acyl-carrier protein]     | C10H19O2SR | C04619  |
| 58 | 3hhACP       | (R)-3-Hydroxyhexanoyl-[acp]                       | C6H11O2SR  | C05747  |
| 59 | 3hicsacp     | (3R)-3-Hydroxyicosanoyl [aceyl-carrier protein]   | C20H39O2X  | 0       |
| 60 | 3hocACP      | (R)-3-Hydroxyoctanoyl-[acyl-carrier protein]      | C8H15O2SR  | C04620  |
| 61 | 3hocdacp     | (3R)-3-Hydroxyoctadecanoyl-[acyl-carrier protein] | C18H35O2X  | 0       |
| 62 | 3hpaACP      | (3R)-3-Hydroxypalmitoyl-[acyl-carrier protein]    | C16H31O2SR | C04633  |

| No | Abbreviation | Name                                               | Formula    | KEGG ID |
|----|--------------|----------------------------------------------------|------------|---------|
| 63 | 3htdACP      | (3R)-3-Hydroxytetradecanoyl-[acyl-carrier protein] | C14H27O2SR | C04688  |
| 64 | 3ig3p        | C <sup>-</sup> -(3-Indolyl)-glycerol 3-phosphate   | C11H12NO6P | C03506  |
| 65 | 3mob         | 3-Methyl-2-oxobutanoate                            | C5H7O3     | C00141  |
| 66 | 3mop         | (S)-3-Methyl-2-oxopentanoate                       | C6H9O3     | C00671  |
| 67 | 3oxddACP     | 3-Oxododecanoyl-[acyl-carrier protein]             | C12H21O2SR | C5756   |
| 68 | 3oxdeACP     | 3-Oxodecanoyl-[acyl-carrier protein]               | C10H17O2SR | C05753  |
| 69 | 3oxhACP      | 3-Oxohexanoyl-[acyl-carrier protein]               | C6H9O2SR   | C05746  |
| 70 | 3oxhdACP     | 3-Oxohexadecanoyl-[acp]                            | C16H29O2SR | C05762  |
| 71 | 3oxicsacp    | 3-Oxoicosanoyl [acyl-carrier protein]              | C20H37O2X  | 0       |
| 72 | 3oxocACP     | 3-Oxoctanoyl-[acyl-carrier protein]                | C8H13O2SR  | C05750  |
| 73 | 3oxocdacp    | 3-Oxoctadecanoyl-[acp]                             | C18H33O2X  | 0       |
| 74 | 3oxtdACP     | 3-Oxotetradecanoyl-[acyl-carrier protein]          | C14H25O2SR | C05759  |
| 75 | 3pg          | 3-Phospho-D-glycerate                              | C3H4O7P    | C00197  |
| 76 | 3php         | 3-Phosphohydroxypyruvate                           | C3H2O7P    | C03232  |
| 77 | 3psme        | 5-O-(1-Carboxyvinyl)-3-phosphoshikimate            | C10H9O10P  | C01269  |

| No | Abbreviation | Name                                                   | Formula        | KEGG ID |
|----|--------------|--------------------------------------------------------|----------------|---------|
| 78 | 4abut        | 4-Aminobutanoate                                       | C4H9NO2        | C00334  |
| 79 | 4abz         | 4-Aminobenzoate                                        | C7H6NO2        | C00568  |
| 80 | 4adcho       | 4-amino-4-deoxychorismate                              | C10H10NO5      | C11355  |
| 81 | 4ahmmp       | 4-Amino-5-hydroxymethyl-2-methylpyrimidine             | C6H9N3O        | C01279  |
| 82 | 4ampm        | 4-Amino-2-methyl-5-phosphomethylpyrimidine             | C6H8N3O4P      | C04556  |
| 83 | 4c2me        | 4-(cytidine 5'-diphospho)-2-C-methyl-D-erythritol      | C14H23N3O14P2  | C11435  |
| 84 | 4hba         | 4-Hydroxy-benzyl alcohol                               | C7H8O2         | 0       |
| 85 | 4hphaccoa    | 4-Hydroxyphenylacetyl-CoA                              | C29H42N7O18P3S | C05338  |
| 86 | 4mop         | 4-Methyl-2-oxopentanoate                               | C6H9O3         | C00233  |
| 87 | 4mpetz       | 4-Methyl-5-(2-phosphoethyl)-thiazole                   | C6H8NO4PS      | C04327  |
| 88 | 4pasp        | 4-Phospho-L-aspartate                                  | C4H6NO7P       | C03082  |
| 89 | 4per         | 4-Phospho-D-erythronate                                | C4H6O8P        | C03393  |
| 90 | 4ppan        | D-4'-Phosphopantothenate                               | C9H15NO8P      | C03492  |
| 91 | 4ppcys       | N-((R)-4-Phosphopantothenoyl)-L-cysteine               | C12H20N2O9PS   | C04352  |
| 92 | 4r5au        | 4-(1-D-Ribitylamino)-5-aminouracil                     | C9H16N4O6      | C04732  |
| 93 | 5aizc        | 5-amino-1-(5-phospho-D-ribosyl)imidazole-4-carboxylate | C9H11N3O9P     | C04751  |
| 94 | 5aprbu       | 5-Amino-6-(5'-phosphoribitylamino)uracil               | C9H15N4O9P     | C04454  |
| 95 | 5apru        | 5-Amino-6-(5'-phosphoribosylamino)uracil               | C9H13N4O9P     | C01268  |

| No  | Abbreviation | Name                                                     | Formula        | KEGG ID |
|-----|--------------|----------------------------------------------------------|----------------|---------|
| 96  | 5mdr1p       | 5-Methylthio-5-deoxy-D-ribose 1-phosphate                | C6H11O7PS      | C04188  |
| 97  | 5mdru1p      | 5-Methylthio-5-deoxy-D-ribulose 1-phosphate              | C6H11O7PS      | C04582  |
| 98  | 5mta         | 5-Methylthioadenosine                                    | C11H15N5O3S    | C00170  |
| 99  | 5mthf        | 5-Methyltetrahydrofolate                                 | C20H24N7O6     | C00440  |
| 100 | 5odhf2a      | 5-Oxo-4,5-dihydrofuran-2-acetate                         | C6H6O4         | C03586  |
| 101 | 5prdmzb      | N1-(5-Phospho-alpha-D-ribosyl)-5,6-dimethylbenzimidazole | C14H17N2O7P    | C04778  |
| 102 | 6phtp        | 6-Pyruvoyl-5,6,7,8-tetrahydropterin                      | C9H11N5O3      | C03684  |
| 103 | 8aonn        | 8-Amino-7-oxononanoate                                   | C9H17NO3       | C01092  |
| 104 | ac           | Acetate                                                  | C2H3O2         | C00033  |
| 105 | ac           | Acetate                                                  | C2H3O2         | C00033  |
| 106 | acACP        | Acetyl-ACP                                               | C13H23N2O8PRS  | C03939  |
| 107 | acald        | Acetaldehyde                                             | C2H4O          | C00084  |
| 108 | accoa        | Acetyl-CoA                                               | C23H34N7O17P3S | C00024  |
| 109 | acg5p        | N-Acetyl-L-glutamyl 5-phosphate                          | C7H9NO8P       | C04133  |
| 110 | acg5sa       | N-Acetyl-L-glutamate 5-semialdehyde                      | C7H10NO4       | C01250  |
| 111 | acgam1p      | N-Acetyl-D-glucosamine 1-phosphate                       | C8H14NO9P      | C04256  |
| 112 | acglu        | N-Acetyl-L-glutamate                                     | C7H9NO5        | C00624  |
| 113 | achms        | O-Acetyl-L-homoserine                                    | C6H11NO4       | C01077  |

| No  | Abbreviation | Name                                                                              | Formula          | KEGG ID |
|-----|--------------|-----------------------------------------------------------------------------------|------------------|---------|
| 114 | acorn        | N2-Acetyl-L-ornithine                                                             | C7H14N2O3        | C00437  |
| 115 | ACP          | acyl carrier protein                                                              | C11H21N2O7PRS    | C00229  |
| 116 | acser        | O-Acetyl-L-serine                                                                 | C5H9NO4          | C00979  |
| 117 | actACP       | Acetoacetyl-ACP                                                                   | C15H25N2O9PRS    | C05744  |
| 118 | adcoba       | Adenosyl cobinamide                                                               | C58H84CoN16O11   | C06508  |
| 119 | adcobap      | Adenosyl cobinamide phosphate                                                     | C58H85CoN16O14P  | C06509  |
| 120 | adcobdam     | Adenosyl cobyrinate diamide                                                       | C55H73CoN11O15   | C06506  |
| 121 | adcobhex     | adenosyl-cobyric acid                                                             | C55H77CoN15O11   | C06507  |
| 122 | ade          | Adenine                                                                           | C5H5N5           | C00147  |
| 123 | adgcoba      | Adenosine-GDP-cobinamide                                                          | C68H97CoN21O21P2 | C06510  |
| 124 | adn          | Adenosine                                                                         | C10H13N5O4       | C00212  |
| 125 | adocbl       | Adenosylcobalamin                                                                 | C72H100CoN18O17P | C00194  |
| 126 | adp          | ADP                                                                               | C10H12N5O10P2    | C00008  |
| 127 | adpglc       | ADPglucose                                                                        | C16H23N5O15P2    | C00498  |
| 128 | adprib       | ADPribose                                                                         | C15H21N5O14P2    | C00301  |
| 129 | agm          | Agmatine                                                                          | C5H16N4          | C00179  |
| 130 | ahcys        | S-Adenosyl-L-homocysteine                                                         | C14H20N6O5S      | C00021  |
| 131 | ahdt         | 2-Amino-4-hydroxy-6-(erythro-1,2,3-trihydroxypropyl)dihydropteridine triphosphate | C9H12N5O13P3     | C04895  |



| No  | Abbreviation | Name                                                   | Formula                                                         | KEGG ID |
|-----|--------------|--------------------------------------------------------|-----------------------------------------------------------------|---------|
| 132 | aicar        | 5-Amino-1-(5-Phospho-D-ribosyl)imidazole-4-carboxamide | C <sub>9</sub> H <sub>13</sub> N <sub>4</sub> O <sub>8</sub> P  | C04677  |
| 133 | air          | 5-amino-1-(5-phospho-D-ribosyl)imidazole               | C <sub>8</sub> H <sub>12</sub> N <sub>3</sub> O <sub>7</sub> P  | C03373  |
| 134 | akg          | 2-Oxoglutarate                                         | C <sub>5</sub> H <sub>4</sub> O <sub>5</sub>                    | C00026  |
| 135 | ala-B        | beta-Alanine                                           | C <sub>3</sub> H <sub>7</sub> NO <sub>2</sub>                   | C00099  |
| 136 | ala-D        | D-Alanine                                              | C <sub>3</sub> H <sub>7</sub> NO <sub>2</sub>                   | C00133  |
| 137 | ala-L        | L-Alanine                                              | C <sub>3</sub> H <sub>7</sub> NO <sub>2</sub>                   | C00041  |
| 138 | alaala       | D-Alanyl-D-alanine                                     | C <sub>6</sub> H <sub>12</sub> N <sub>2</sub> O <sub>3</sub>    | C00993  |
| 139 | alac-S       | (S)-2-Acetolactate                                     | C <sub>5</sub> H <sub>7</sub> O <sub>4</sub>                    | C06010  |
| 140 | alatrna      | L-Alanyl-tRNA(Ala)                                     | C <sub>3</sub> H <sub>6</sub> NOR                               | C00886  |
| 141 | amet         | S-Adenosyl-L-methionine                                | C <sub>15</sub> H <sub>23</sub> N <sub>6</sub> O <sub>5</sub> S | C00019  |
| 142 | amob         | S-Adenosyl-4-methylthio-2-oxobutanoate                 | C <sub>15</sub> H <sub>19</sub> N <sub>5</sub> O <sub>6</sub> S | C04425  |
| 143 | amp          | AMP                                                    | C <sub>10</sub> H <sub>12</sub> N <sub>5</sub> O <sub>7</sub> P | C00020  |
| 144 | anth         | Anthranilate                                           | C <sub>7</sub> H <sub>6</sub> NO <sub>2</sub>                   | C00108  |
| 145 | antim        | Antimonite                                             | Sb                                                              | 0       |
| 146 | antim        | Antimonite                                             | Sb                                                              | 0       |
| 147 | apoACP       | apoprotein [acyl carrier protein]                      | RHO                                                             | 0       |

| No  | Abbreviation | Name                           | Formula         | KEGG ID |
|-----|--------------|--------------------------------|-----------------|---------|
| 148 | aps          | Adenosine 5'-phosphosulfate    | C10H12N5O10PS   | C00224  |
| 149 | arg-L        | L-Arginine                     | C6H15N4O2       | C00062  |
| 150 | argsuc       | N(omega)-(L-Arginino)succinate | C10H17N4O6      | C03406  |
| 151 | argtrna      | L-Arginyl-tRNA(Arg)            | C6H14N4OR       | C02163  |
| 152 | arsna        | Arsenate                       | AsH3O4          | C01478  |
| 153 | arsna        | Arsenate                       | AsH3O5          | C01479  |
| 154 | arsni2       | arsenite                       | AsH3O3          | C06697  |
| 155 | arsni2       | arsenite                       | AsH3O4          | C06698  |
| 156 | asn-L        | L-Asparagine                   | C4H8N2O3        | C00152  |
| 157 | asp-L        | L-Aspartate                    | C4H6NO4         | C00049  |
| 158 | aspsa        | L-Aspartate 4-semialdehyde     | C4H7NO3         | C00441  |
| 159 | asptrna      | L-Aspartyl-tRNA(Asp)           | C4H5NO3R        | C02984  |
| 160 | atp          | ATP                            | C10H12N5O13P3   | C00002  |
| 161 | btamp        | Biotinyl-5'-AMP                | C20H28N7O9PS    | C05921  |
| 162 | btn          | Biotin                         | C10H15N2O3S     | C00120  |
| 163 | butACP       | Butyryl-[acyl-carrier protein] | C15H27N2O8PRS   | C05745  |
| 164 | camp         | cAMP                           | C10H11N5O6P     | C00575  |
| 165 | cbasp        | N-Carbamoyl-L-aspartate        | C5H6N2O5        | C00438  |
| 166 | cbi          | Cobinamide                     | C48H72CoN11O8   | C05774  |
| 167 | cbl1         | Cob(I)alamin                   | C62H88CoN13O14P | C00853  |

| No  | Abbreviation | Name                       | Formula          | KEGG ID |
|-----|--------------|----------------------------|------------------|---------|
| 168 | cbl1         | Cob(I)alamin               | C62H88CoN13O14P  | C00853  |
| 169 | cbp          | Carbamoyl phosphate        | CH2NO5P          | C00169  |
| 170 | ccnt         | Citraconate                | C5H6O4           | C02226  |
| 171 | cdlp         | Cardiolipin                | C13H18O17P2R4    | C05980  |
| 172 | cdp          | CDP                        | C9H12N3O11P2     | C00112  |
| 173 | cdpdag       | CDPdiacylglycerol          | C14H19N3O15P2R2  | C00269  |
| 174 | chor         | Chorismate                 | C10H8O6          | C00251  |
| 175 | cit          | Citrate                    | C6H5O7           | C00158  |
| 176 | cit          | Citrate                    | C6H5O7           | C00158  |
| 177 | citr-L       | L-Citrulline               | C6H13N3O3        | C00327  |
| 178 | citrml       | (3R)-citramalate           | C5H8O5           | C02612  |
| 179 | cl           | Chloride                   | Cl               | C00115  |
| 180 | cmp          | CMP                        | C9H12N3O8P       | C00055  |
| 181 | co           | Carbon monoxide            | CO               | C00237  |
| 182 | co1dam       | Cob(I)yrinate a,c diamide  | C45H61CoN6O12    | C06505  |
| 183 | co2          | CO2                        | CO2              | C00011  |
| 184 | co2          | CO2                        | CO2              | C00011  |
| 185 | co2dam       | Cob(II)yrinate a,c diamide | C45H61CoN6O12    | C06504  |
| 186 | coa          | Coenzyme A                 | C21H32N7O16P3S   | C00010  |
| 187 | cobalt2      | Co2+                       | Co               | C00175  |
| 188 | cobalt2      | Co2+                       | Co               | C00175  |
| 189 | cobamcoa     | Cobamide coenzyme          | C72H101CoN18O17P | C00194  |
| 190 | cobrnt       | Cobyrinate                 | C45H59CoN4O14    | C05773  |
| 191 | codhpre6     | Cobalt-dihydro-precorrin 6 | C44H55CoN4O16    | 0       |
| 192 | copre3       | cobalt-precorrin 3         | C43H47CoN4O16    | C11539  |
| 193 | copre4       | cobalt-precorrin 4         | C44H50CoN4O16    | C11540  |

| No  | Abbreviation | Name                                       | Formula                                                                         | KEGG ID |
|-----|--------------|--------------------------------------------|---------------------------------------------------------------------------------|---------|
| 194 | copre8       | Cobalt-precorrin 8                         | C <sub>45</sub> H <sub>59</sub> CoN <sub>4</sub> O <sub>14</sub>                | C11545  |
| 195 | cpppg3       | Coproporphyrinogen III                     | C <sub>36</sub> H <sub>40</sub> N <sub>4</sub> O <sub>8</sub>                   | C03263  |
| 196 | ctp          | CTP                                        | C <sub>9</sub> H <sub>12</sub> N <sub>3</sub> O <sub>14</sub> P <sub>3</sub>    | C00063  |
| 197 | cu2          | Cu <sup>2+</sup>                           | Cu                                                                              | C00070  |
| 198 | cu2          | Cu <sup>2+</sup>                           | Cu                                                                              | C00071  |
| 199 | cys-L        | L-Cysteine                                 | C <sub>3</sub> H <sub>7</sub> NO <sub>2</sub> S                                 | C00097  |
| 200 | cysam        | Cysteamine                                 | C <sub>2</sub> H <sub>7</sub> NS                                                | C01678  |
| 201 | cystrna      | L-Cysteinyl-tRNA(Cys)                      | C <sub>3</sub> H <sub>6</sub> NOSR                                              | C03125  |
| 202 | dad-5        | 5'-Deoxyadenosine                          | C <sub>10</sub> H <sub>13</sub> N <sub>5</sub> O <sub>3</sub>                   | C05198  |
| 203 | dadp         | dADP                                       | C <sub>10</sub> H <sub>12</sub> N <sub>5</sub> O <sub>9</sub> P <sub>2</sub>    | C00206  |
| 204 | damp         | dAMP                                       | C <sub>10</sub> H <sub>12</sub> N <sub>5</sub> O <sub>6</sub> P                 | C00360  |
| 205 | dann         | 7,8-Diaminononanoate                       | C <sub>9</sub> H <sub>21</sub> N <sub>2</sub> O <sub>2</sub>                    | C01037  |
| 206 | datp         | dATP                                       | C <sub>10</sub> H <sub>12</sub> N <sub>5</sub> O <sub>12</sub> P <sub>3</sub>   | C00131  |
| 207 | db4p         | 3,4-dihydroxy-2-butanone 4-phosphate       | C <sub>4</sub> H <sub>7</sub> O <sub>6</sub> P                                  | 0       |
| 208 | dcamp        | N <sup>6</sup> -(1,2-Dicarboxyethyl)-AMP   | C <sub>14</sub> H <sub>14</sub> N <sub>5</sub> O <sub>11</sub> P                | C03794  |
| 209 | dcb          | 1,4-Dichlorobenzene (para-Dichlorobenzene) | C <sub>6</sub> H <sub>4</sub> Cl <sub>2</sub>                                   | C07092  |
| 210 | dcdp         | dCDP                                       | C <sub>9</sub> H <sub>12</sub> N <sub>3</sub> O <sub>10</sub> P <sub>2</sub>    | C00705  |
| 211 | dcmp         | dCMP                                       | C <sub>9</sub> H <sub>12</sub> N <sub>3</sub> O <sub>7</sub> P                  | C00239  |
| 212 | dctp         | dCTP                                       | C <sub>9</sub> H <sub>12</sub> N <sub>3</sub> O <sub>13</sub> P <sub>3</sub>    | C00458  |
| 213 | ddca         | dodecanoate (C <sub>12</sub> :0)           | C <sub>12</sub> H <sub>23</sub> O <sub>2</sub>                                  | C02679  |
| 214 | ddcaACP      | Dodecanoyl-ACP (n-C <sub>12</sub> :0ACP)   | C <sub>23</sub> H <sub>43</sub> N <sub>2</sub> O <sub>8</sub> PRS               | C05223  |
| 215 | ddcoa        | Dodecanoyl-CoA (n-C <sub>12</sub> :0CoA)   | C <sub>33</sub> H <sub>58</sub> N <sub>7</sub> O <sub>17</sub> P <sub>3</sub> S | C01832  |
| 216 | de3mlt       | D-erythro-3-Methylmalate                   | C <sub>5</sub> H <sub>8</sub> O <sub>5</sub>                                    | C06032  |
| 217 | decACP       | Decanoyl-[acyl-carrier protein]            | C <sub>10</sub> H <sub>19</sub> OSR                                             | C05755  |

| No  | Abbreviation | Name                                                                        | Formula        | KEGG ID |
|-----|--------------|-----------------------------------------------------------------------------|----------------|---------|
| 218 | decdp        | all-trans-Decaprenyl diphosphate                                            | C50H84O7P2     | C04509  |
| 219 | dgdp         | dGDP                                                                        | C10H12N5O10P2  | C00361  |
| 220 | dgmp         | dGMP                                                                        | C10H12N5O7P    | C00362  |
| 221 | dgsn         | Deoxyguanosine                                                              | C10H13N5O4     | C00330  |
| 222 | dgtp         | dGTP                                                                        | C10H12N5O13P3  | C00286  |
| 223 | dhap         | Dihydroxyacetone phosphate                                                  | C3H5O6P        | C00111  |
| 224 | dhf          | 7,8-Dihydrofolate                                                           | C19H19N7O6     | C00415  |
| 225 | dhipro       | Dihydrolipolprotein                                                         | C8H16NOS2R     | C02972  |
| 226 | dhna         | 1,4-Dihydroxy-2-naphthoate                                                  | C11H7O4        | C03657  |
| 227 | dhnpt        | 2-Amino-4-hydroxy-6-(D-erythro-1,2,3-trihydroxypropyl)-7,8-dihydropteridine | C9H13N5O4      | C04874  |
| 228 | dhor-S       | (S)-Dihydroorotate                                                          | C5H5N2O4       | C00337  |
| 229 | dhmp         | Dihydroneopterin monophosphate                                              | C9H12N5O7P     | C05925  |
| 230 | dhpt         | Dihydropteroate                                                             | C14H13N6O3     | C00921  |
| 231 | dimp         | dIMP                                                                        | C10H11N4O7P    | C06196  |
| 232 | ditp         | dITP                                                                        | C10H11N4O13P3  | C01345  |
| 233 | dmbzid       | 5,6-Dimethylbenzimidazole                                                   | C9H10N2        | C03114  |
| 234 | dmlz         | 6,7-Dimethyl-8-(1-D-ribityl)lumazine                                        | C13H18N4O6     | C04332  |
| 235 | dmpp         | Dimethylallyl diphosphate                                                   | C5H9O7P2       | C00235  |
| 236 | dnad         | Deamino-NAD+                                                                | C21H24N6O15P2  | C00857  |
| 237 | dpcoa        | Dephospho-CoA                                                               | C21H33N7O13P2S | C00882  |
| 238 | dtbt         | Dethiobiotin                                                                | C10H17N2O3     | C01909  |
| 239 | dtdp         | dTDP                                                                        | C10H13N2O11P2  | C00363  |

| No  | Abbreviation | Name                                            | Formula         | KEGG ID |
|-----|--------------|-------------------------------------------------|-----------------|---------|
| 240 | dtdpglc      | dTDPglucose                                     | C16H26N2O16P2   | C00842  |
| 241 | dtmp         | dTMP                                            | C10H13N2O8P     | C00364  |
| 242 | dttp         | dTTP                                            | C10H13N2O14P3   | C00459  |
| 243 | dudp         | dUDP                                            | C9H11N2O11P2    | C01346  |
| 244 | dump         | dUMP                                            | C9H11N2O8P      | C00365  |
| 245 | duto         | dUTP                                            | C9H11N2O14P3    | C00460  |
| 246 | dxyl5p       | 1-deoxy-D-xylulose 5-phosphate                  | C5H9O7P         | C11437  |
| 247 | e4p          | D-Erythrose 4-phosphate                         | C4H7O7P         | C00279  |
| 248 | eig3p        | D-erythro-1-(Imidazol-4-yl)glycerol 3-phosphate | C6H9N2O6P       | C04666  |
| 249 | etl          | Ethylene                                        | C2H4            | 0       |
| 250 | etoh         | Ethanol                                         | C2H6O           | C00469  |
| 251 | f1p          | D-Fructose 1-phosphate                          | C6H11O9P        | C02976  |
| 252 | f6p          | D-Fructose 6-phosphate                          | C6H11O9P        | C00085  |
| 253 | fa11         | Fatty acid (Iso-C17:0)                          | C17H34O2        | 0       |
| 254 | fa11coa      | Iso-C17:0 CoA                                   | C38H68N7O17P3S1 | 0       |
| 255 | fad          | FAD                                             | C27H31N9O15P2   | C00016  |
| 256 | fadh2        | FADH2                                           | C27H33N9O15P2   | C01352  |
| 257 | fc1p         | L-Fuculose 1-phosphate                          | C6H11O8P        | C01099  |
| 258 | fdox         | ferredoxin (oxidized) 2[4Fe-4S]                 | Fe8S8X          | 0       |

| No  | Abbreviation | Name                                                                    | Formula     | KEGG ID |
|-----|--------------|-------------------------------------------------------------------------|-------------|---------|
| 259 | fdp          | D-Fructose 1,6-bisphosphate                                             | C6H10O12P2  | C00354  |
| 260 | fdred        | ferredoxin (reduced) 2[4Fe-4S]                                          | Fe8S8X      | 0       |
| 261 | fe2          | Fe <sup>2+</sup>                                                        | Fe          | C00023  |
| 262 | fe2          | Fe <sup>2+</sup>                                                        | Fe          | C00023  |
| 263 | fgam         | N <sup>2</sup> -Formyl-N <sup>1</sup> -(5-phospho-D-ribosyl)glycinamide | C8H13N2O9P  | C04376  |
| 264 | fmet         | N-Formyl-L-methionine                                                   | C6H11NO3S   | C03145  |
| 265 | fmettrna     | N-Formylmethionyl-tRNA                                                  | C6H9NO2SR   | C03294  |
| 266 | fmn          | flavin mononucleotide                                                   | C17H19N4O9P | C00061  |
| 267 | fol          | Folate                                                                  | C19H19N7O6  | C00504  |
| 268 | for          | Formate                                                                 | CH1O2       | C00058  |
| 269 | fpram        | 2-(Formamido)-N <sup>1</sup> -(5-phospho-D-ribosyl)acetamidine          | C8H15N3O8P  | C04640  |
| 270 | fprica       | 5-Formamido-1-(5-phospho-D-ribosyl)imidazole-4-carboxamide              | C10H13N4O9P | C04734  |
| 271 | frdp         | Farnesyl diphosphate                                                    | C15H25O7P2  | C00448  |
| 272 | fru          | D-Fructose                                                              | C6H12O6     | C00095  |
| 273 | fum          | Fumarate                                                                | C4H2O4      | C00122  |
| 274 | g1p          | D-Glucose 1-phosphate                                                   | C6H11O9P    | C00103  |
| 275 | g3p          | Glyceraldehyde 3-phosphate                                              | C3H5O6P     | C00661  |
| 276 | g6p          | D-Glucose 6-phosphate                                                   | C6H11O9P    | C00092  |
| 277 | gam1p        | D-Glucosamine 1-phosphate                                               | C6H13NO8P   | C06156  |

| No  | Abbreviation | Name                                     | Formula       | KEGG ID |
|-----|--------------|------------------------------------------|---------------|---------|
| 278 | gam6p        | D-Glucosamine 6-phosphate                | C6H13NO8P     | C00352  |
| 279 | gar          | N1-(5-Phospho-D-ribosyl)glycinamide      | C7H14N2O8P    | C03838  |
| 280 | gcald        | Glycolaldehyde                           | C2H4O2        | C00266  |
| 281 | gdp          | GDP                                      | C10H12N5O11P2 | C00035  |
| 282 | gdpman       | GDP-D-mannose                            | C16H25N5O16P2 | C00096  |
| 283 | gdptp        | Guanosine 3'-diphosphate 5'-triphosphate | C10H11N5O20P5 | C04494  |
| 284 | ggdp         | Geranylgeranyl diphosphate               | C20H36O7P2    | C00353  |
| 285 | glc-D        | D-Glucose                                | C6H12O6       | C00031  |
| 286 | gln-L        | L-Glutamine                              | C5H10N2O3     | C00064  |
| 287 | gln-L        | L-Glutamine                              | C5H10N2O3     | C00064  |
| 288 | glnrna       | L-Glutaminyl-tRNA(Gln)                   | C5H9N2O2R     | C02282  |
| 289 | glu-L        | L-Glutamate                              | C5H8NO4       | C00025  |
| 290 | glu5p        | L-Glutamate 5-phosphate                  | C5H8NO7P      | C03287  |
| 291 | glu5sa       | L-Glutamate 5-semialdehyde               | C5H9NO3       | C01165  |
| 292 | glutrna      | L-Glutamyl-tRNA(Glu)                     | C5H7NO3R      | C02987  |
| 293 | gly          | Glycine                                  | C2H5NO2       | C00037  |
| 294 | glyald       | D-Glyceraldehyde                         | C3H6O3        | C00577  |
| 295 | glyb         | Glycine betaine                          | C5H11NO2      | C00719  |
| 296 | glyb         | Glycine betaine                          | C5H11NO2      | C00719  |
| 297 | glyc         | Glycerol                                 | C3H8O3        | C00116  |
| 298 | glyc-R       | (R)-Glycerate                            | C3H5O4        | C00258  |
| 299 | glyc3p       | sn-Glycerol 3-phosphate                  | C3H7O6P       | C00093  |



| No  | Abbreviation | Name                                           | Formula       | KEGG ID |
|-----|--------------|------------------------------------------------|---------------|---------|
| 300 | glycogen     | glycogen                                       | C6H10O5       | C00182  |
| 301 | glytrna      | Glycyl-tRNA(Gly)                               | C2H4NOR       | C02412  |
| 302 | gmp          | GMP                                            | C10H12N5O8P   | C00144  |
| 303 | grdp         | Geranyl diphosphate                            | C10H17O7P2    | C00341  |
| 304 | gsn          | Guanosine                                      | C10H13N5O5    | C00387  |
| 305 | gthrd        | Reduced glutathione                            | C10H16N3O6S   | C00051  |
| 306 | gtp          | GTP                                            | C10H12N5O14P3 | C00044  |
| 307 | gua          | Guanine                                        | C5H5N5O       | C00242  |
| 308 | h            | H+                                             | H             | C00080  |
| 309 | h            | H+                                             | H             | C00080  |
| 310 | h2           | H2                                             | H2            | C00282  |
| 311 | h2           | H2                                             | H2            | C00282  |
| 312 | h2mb4p       | 1-hydroxy-2-methyl-2-(E)-butenyl 4-diphosphate | C5H9O8P2      | C11811  |
| 313 | h2o          | H2O                                            | H2O           | C00001  |
| 314 | h2o          | H2O                                            | H2O           | C00001  |
| 315 | h2o2         | Hydrogen peroxide                              | H2O2          | C00027  |
| 316 | h2s          | Hydrogen sulfide                               | H2S           | C00283  |
| 317 | hcb          | Hexachlorobenzene                              | C6Cl6         | C11042  |
| 318 | hcit         | Homocitrate                                    | C7H10O7       | C01251  |
| 319 | hco3         | Bicarbonate                                    | CHO3          | C00288  |
| 320 | hcys-L       | L-Homocysteine                                 | C4H9NO2S      | C00155  |
| 321 | hdca         | Hexadecanoate (n-C16:0)                        | C16H31O2      | C00249  |
| 322 | hdeACP       | Hexadecenoyl-ACP (n-C16:1ACP)                  | C27H49N2O8PRS | 0       |
| 323 | hepdp        | all-trans-Heptaprenyl diphosphate              | C35H60O7P2    | C04216  |
| 324 | hexACP       | Hexanoyl-[acyl-carrier protein]                | C17H31N2O8PRS | C05749  |
| 325 | hexdp        | all-trans-Hexaprenyl diphosphate               | C30H52O7P2    | C01230  |

| No  | Abbreviation | Name                                    | Formula        | KEGG ID |
|-----|--------------|-----------------------------------------|----------------|---------|
| 326 | hg0          | Mercury (uncharged)                     | Hg             | C01319  |
| 327 | hg2          | Mercury (charged +2)                    | Hg             | C00703  |
| 328 | his-L        | L-Histidine                             | C6H9N3O2       | C00135  |
| 329 | hisP         | L-Histidinol phosphate                  | C6H11N3O4P     | C01100  |
| 330 | histd        | L-Histidinol                            | C6H12N3O       | C00860  |
| 331 | histrna      | L-Histidyl-tRNA(His)                    | C6H8N3OR       | C02988  |
| 332 | hmbil        | Hydroxymethylbilane                     | C40H38N4O17    | C01024  |
| 333 | hom-L        | L-Homoserine                            | C4H9NO3        | C00263  |
| 334 | hspmd        | Homospermidine                          | C8H21N3        | C06366  |
| 335 | hxan         | Hypoxanthine                            | C5H4N4O        | C00262  |
| 336 | iasp         | Iminoaspartate                          | C4H3NO4        | C05840  |
| 337 | ibcoa        | Isobutyryl-CoA                          | C25H42N7O17P3S | C00630  |
| 338 | icit         | Isocitrate                              | C6H5O7         | C00311  |
| 339 | icsa         | Icosanoate (n-C20:0)                    | C20H40O2       | C06425  |
| 340 | icsACP       | Icosanoyl-ACP (n-C20:0ACP)              | C20H39OX       | 0       |
| 341 | icscoa       | Icosanoyl-CoA (n-C20:0-CoA)             | C41H74N7O17P3S | C16180  |
| 342 | idp          | IDP                                     | C10H11N4O11P2  | C00104  |
| 343 | ile-L        | L-Isoleucine                            | C6H13NO2       | C00407  |
| 344 | ile-L        | L-Isoleucine                            | C6H13NO2       | C00407  |
| 345 | iletrna      | L-Isoleucyl-tRNA(Ile)                   | C6H12NOR       | C03127  |
| 346 | imacp        | 3-(Imidazol-4-yl)-2-oxopropyl phosphate | C6H7N2O5P      | C01267  |
| 347 | imp          | IMP                                     | C10H11N4O8P    | C00130  |
| 348 | indaccoa     | S-2-(indol-3-yl)acetyl-CoA              | C31H43N8O17P3S | 0       |

| No  | Abbreviation | Name                                                            | Formula        | KEGG ID |
|-----|--------------|-----------------------------------------------------------------|----------------|---------|
| 349 | indpyr       | Indolepyruvate                                                  | C11H9NO3       | C00331  |
| 350 | ipdp         | Isopentenyl diphosphate                                         | C5H9O7P2       | C00129  |
| 351 | itp          | ITP                                                             | C10H11N4O14P3  | C00081  |
| 352 | ivcoa        | Isovaleryl-CoA                                                  | C26H44N7O17P3S | C02939  |
| 353 | k            | K+                                                              | K              | C00238  |
| 354 | k            | K+                                                              | K              | C00238  |
| 355 | lac-D        | D-Lactate                                                       | C3H5O3         | C00256  |
| 356 | lac-L        | L-Lactate                                                       | C3H5O3         | C00186  |
| 357 | lald-L       | L-Lactaldehyde                                                  | C3H6O2         | C00424  |
| 358 | leu-L        | L-Leucine                                                       | C6H13NO2       | C00123  |
| 359 | leu-L        | L-Leucine                                                       | C6H13NO2       | C00123  |
| 360 | leutrna      | L-Leucyl-tRNA(Leu)                                              | C6H12NOR       | C02047  |
| 361 | lgt-S        | (R)-S-Lactoylglutathione                                        | C13H20N3O8S    | C03451  |
| 362 | lipidAds     | Lipid A Disaccharide                                            | C68H127N2O20P  | C04932  |
| 363 | lipidX       | 2,3-Bis(3-hydroxytetradecanoyl)-beta-D-glucosaminyl 1-phosphate | C34H64NO12P    | C04824  |
| 364 | lpro         | Lipoylprotein                                                   | C8H14NOS2R     | C02051  |
| 365 | Lsacchrp     | L-Saccharopine                                                  | C11H20N2O6     | C00449  |
| 366 | lys-L        | L-Lysine                                                        | C6H15N2O2      | C00047  |
| 367 | lystrna      | L-Lysine-tRNA (Lys)                                             | C6H14N2OR      | C01931  |
| 368 | mal-L        | L-Malate                                                        | C4H4O5         | C00149  |
| 369 | malACP       | Malonyl-[acyl-carrier protein]                                  | C14H22N2O10PRS | C01209  |
| 370 | malcoa       | Malonyl-CoA                                                     | C24H33N7O19P3S | C00083  |
| 371 | man1p        | D-Mannose 1-phosphate                                           | C6H11O9P       | C03812  |
| 372 | man6p        | D-Mannose 6-phosphate                                           | C6H11O9P       | C00275  |

| No  | Abbreviation | Name                                                  | Formula        | KEGG ID |
|-----|--------------|-------------------------------------------------------|----------------|---------|
| 373 | met-L        | L-Methionine                                          | C5H11NO2S      | C00073  |
| 374 | methf        | 5,10-Methenyltetrahydrofolate                         | C20H20N7O6     | C00445  |
| 375 | metox        | L-Methionine S-oxide                                  | C5H11NO3S      | C02989  |
| 376 | mettrna      | L-Methionyl-tRNA (Met)                                | C5H10NOSR      | C02430  |
| 377 | mg2          | Mg                                                    | Mg             | C00305  |
| 378 | mg2          | Mg                                                    | Mg             | C00305  |
| 379 | micit        | Methylisocitrate                                      | C7H7O7         | C04593  |
| 380 | mlthf        | 5,10-Methylenetetrahydrofolate                        | C20H21N7O6     | C00143  |
| 381 | mmcoa-S      | (S)-Methylmalonyl-CoA                                 | C25H35N7O19P3S | C00683  |
| 382 | mn2          | Mn2+                                                  | Mn             | C00034  |
| 383 | mn2          | Mn2+                                                  | Mn             | C00034  |
| 384 | mobd         | Molybdate                                             | MoO4           | C06232  |
| 385 | mobd         | Molybdate                                             | MoO4           | C06232  |
| 386 | mql7         | Menaquinol 7                                          | C46H66O2       | 0       |
| 387 | mql8         | Menaquinol 8                                          | C51H74O2       | C05819  |
| 388 | mqn7         | Menaquinone 7                                         | C46H64O2       | 0       |
| 389 | mqn8         | Menaquinone 8                                         | C51H72O2       | C00828  |
| 390 | mthgxl       | Methylglyoxal                                         | C3H4O2         | C00546  |
| 391 | myrsACP      | Myristoyl-ACP (n-C14:0ACP)                            | C25H47N2O8PRS  | C05761  |
| 392 | nac          | Nicotinate                                            | C6H4NO2        | C00253  |
| 393 | nad          | Nicotinamide adenine dinucleotide                     | C21H26N7O14P2  | C00003  |
| 394 | nadh         | Nicotinamide adenine dinucleotide - reduced           | C21H27N7O14P2  | C00004  |
| 395 | nadp         | Nicotinamide adenine dinucleotide phosphate           | C21H25N7O17P3  | C00006  |
| 396 | nadph        | Nicotinamide adenine dinucleotide phosphate - reduced | C21H26N7O17P3  | C00005  |

| No  | Abbreviation | Name                             | Formula        | KEGG ID |
|-----|--------------|----------------------------------|----------------|---------|
| 397 | nh4          | Ammonium                         | H4N            | C01342  |
| 398 | nh4          | Ammonium                         | H4N            | C01342  |
| 399 | nh4oh        | Ammonium hydroxide               | H5NO           | C01358  |
| 400 | ni2          | Ni <sup>2+</sup>                 | Ni             | C00291  |
| 401 | ni2          | Ni <sup>2+</sup>                 | Ni             | C00291  |
| 402 | nicrnt       | Nicotinate D-ribonucleotide      | C11H12NO9P     | C01185  |
| 403 | nmn          | NMN                              | C11H14N2O8P    | C00455  |
| 404 | no2          | Nitrite                          | NO2            | C00088  |
| 405 | nondp        | all-trans-Nonaprenyl diphosphate | C45H76O7P2     | C04145  |
| 406 | o2           | O2                               | O2             | C00007  |
| 407 | o2-          | Superoxide                       | O2             | C00704  |
| 408 | oaa          | Oxaloacetate                     | C4H2O5         | C00036  |
| 409 | ocdACP       | Octadecanoyl-ACP (n-C18:0ACP)    | C18H35OX       | 0       |
| 410 | ocdca        | octadecanoate (n-C18:0)          | C18H35O2       | C01530  |
| 411 | ocdcea       | octadecenoate (n-C18:1)          | C18H33O2       | 0       |
| 412 | octACP       | Octanoyl-[acyl-carrier protein]  | C8H15OSR       | C05752  |
| 413 | octdp        | all-trans-Octaprenyl diphosphate | C40H65O7P2     | C04146  |
| 414 | odecoa       | Octadecenoyl-CoA (n-C18:1CoA)    | C39H64N7O17P3S | 0       |
| 415 | orn-L        | L-Ornithine                      | C5H12N2O2      | C01602  |
| 416 | orot         | Orotate                          | C5H3N2O4       | C00295  |
| 417 | orot5p       | Orotidine 5'-phosphate           | C10H10N2O11P   | C01103  |
| 418 | palmACP      | Palmitoyl-ACP (n-C16:0ACP)       | C27H51N2O8PRS  | C05764  |
| 419 | pan4p        | Pantetheine 4'-phosphate         | C11H21N2O7PS   | C01134  |
| 420 | pant-R       | (R)-Pantoate                     | C6H11O4        | C00522  |
| 421 | pap          | Adenosine 3',5'-bisphosphate     | C10H11N5O10P2  | C00054  |

| No  | Abbreviation | Name                              | Formula        | KEGG ID |
|-----|--------------|-----------------------------------|----------------|---------|
| 422 | pce          | Tetrachloroethylene               | C2Cl4          | C06789  |
| 423 | pdx5p        | Pyridoxine 5'-phosphate           | C8H10NO6P      | C00627  |
| 424 | pendp        | all-trans-Pentaprenyl diphosphate | C25H44O7P2     | C04217  |
| 425 | pep          | Phosphoenolpyruvate               | C3H2O6P        | C00074  |
| 426 | pgly         | Phosphatidylglycerol              | C8H13O10PR2    | C00344  |
| 427 | pglyp        | Phosphatidylglycerophosphate      | C8H14O13P2R2   | C03892  |
| 428 | phaccoa      | Phenylacetyl-CoA                  | C29H38N7O17P3S | C00582  |
| 429 | phe-L        | L-Phenylalanine                   | C9H11NO2       | C00079  |
| 430 | pheac        | Phenylacetate                     | C8H8O2         | C07086  |
| 431 | phetrna      | L-Phenylalanyl-tRNA(Phe)          | C9H10NOR       | C03511  |
| 432 | phom         | O-Phospho-L-homoserine            | C4H8NO6P       | C01102  |
| 433 | phpyr        | Phenylpyruvate                    | C9H7O3         | C00166  |
| 434 | phthr        | O-Phospho-4-hydroxy-L-threonine   | C4H8NO7P       | C06055  |
| 435 | pi           | Phosphate                         | HO4P           | C00009  |
| 436 | pi           | Phosphate                         | HO4P           | C00009  |
| 437 | pmtcoa       | Palmitoyl-CoA (n-C16:0CoA)        | C37H62N7O17P3S | C00154  |
| 438 | pnto-R       | (R)-Pantothenate                  | C9H16NO5       | C00864  |
| 439 | ppal         | Propanal                          | C3H6O          | C00479  |
| 440 | ppcoa        | Propanoyl-CoA                     | C24H36N7O17P3S | C00100  |
| 441 | pphn         | Prephenate                        | C10H8O6        | C00254  |
| 442 | ppi          | Diphosphate                       | HO7P2          | C00013  |
| 443 | ppoh         | Propanol                          | C3H8O          | C05979  |
| 444 | pppg9        | Protoporphyrinogen IX             | C34H38N4O4     | C01079  |

| No  | Abbreviation | Name                                                                                                 | Formula       | KEGG ID |
|-----|--------------|------------------------------------------------------------------------------------------------------|---------------|---------|
| 445 | pppi         | Inorganic triphosphate                                                                               | HO10P3        | C03279  |
| 446 | pram         | 5-Phospho-beta-D-ribosylamine                                                                        | C5H11NO7P     | C03090  |
| 447 | pran         | N-(5-Phospho-D-ribosyl)anthranilate                                                                  | C12H13NO9P    | C04302  |
| 448 | prbamp       | 1-(5-Phosphoribosyl)-AMP                                                                             | C15H19N5O14P2 | C02741  |
| 449 | prbatp       | 1-(5-Phosphoribosyl)-ATP                                                                             | C15H19N5O20P4 | C02739  |
| 450 | prfp         | 1-(5-Phosphoribosyl)-5-[(5-phosphoribosylamino)methylideneamino]imidazole-4-carboxamide              | C15H21N5O15P2 | C04896  |
| 451 | prlp         | 5-[(5-phospho-1-deoxyribulos-1-ylamino)methylideneamino]-1-(5-phosphoribosyl)imidazole-4-carboxamide | C15H21N5O15P2 | C04916  |
| 452 | pro-L        | L-Proline                                                                                            | C5H9NO2       | C00148  |
| 453 | pro-L        | L-Proline                                                                                            | C5H9NO2       | C00148  |
| 454 | protrna      | L-Prolyl-tRNA(Pro)                                                                                   | C5H8NOR       | C02702  |
| 455 | prpp         | 5-Phospho-alpha-D-ribose 1-diphosphate                                                               | C5H8O14P3     | C00119  |
| 456 | ps           | Phosphatidylserine                                                                                   | C8H12NO10PR2  | C02737  |
| 457 | psd5p        | Pseudouridine 5'-phosphate                                                                           | C9H13N2O9P    | C01168  |
| 458 | pser-L       | O-Phospho-L-serine                                                                                   | C3H6NO6P      | C01005  |
| 459 | ptrc         | Putrescine                                                                                           | C4H14N2       | C00134  |
| 460 | ptth         | Pantetheine                                                                                          | C11H22N2O4S   | C00831  |
| 461 | pyam5p       | Pyridoxamine 5'-phosphate                                                                            | C8H12N2O5P    | C00647  |
| 462 | pydx5p       | Pyridoxal 5'-phosphate                                                                               | C8H8NO6P      | C00018  |
| 463 | pyr          | Pyruvate                                                                                             | C3H3O3        | C00022  |
| 464 | quln         | Quinolinate                                                                                          | C7H3NO4       | C03722  |
| 465 | r5p          | alpha-D-Ribose 5-phosphate                                                                           | C5H9O8P       | C00117  |

| No  | Abbreviation | Name                                           | Formula        | KEGG ID |
|-----|--------------|------------------------------------------------|----------------|---------|
| 466 | rdmbzi       | N1-(alpha-D-ribosyl)-5,6-dimethylbenzimidazole | C14H18N2O4     | C05775  |
| 467 | rib-D        | D-Ribose                                       | C5H10O5        | C00121  |
| 468 | ribflv       | Riboflavin                                     | C17H20N4O6     | C00255  |
| 469 | ru5p-D       | D-Ribulose 5-phosphate                         | C5H9O8P        | C00199  |
| 470 | s            | Sulfur                                         | S              | C00087  |
| 471 | s7p          | Sedoheptulose 7-phosphate                      | C7H13O10P      | C00281  |
| 472 | ser-L        | L-Serine                                       | C3H7NO3        | C00065  |
| 473 | sertrna      | L-Seryl-tRNA(Ser)                              | C3H6NO2R       | C02553  |
| 474 | shcl         | dihydrosirohydrochlorin                        | C42H48N4O16    | C02463  |
| 475 | skm          | Shikimate                                      | C7H9O5         | C00493  |
| 476 | skm5p        | Shikimate 5-phosphate                          | C7H8O8P        | C03175  |
| 477 | sl26da       | N-Succinyl-LL-2,6-diaminoheptanedioate         | C11H16N2O7     | C04421  |
| 478 | sl2a6o       | N-Succinyl-2-L-amino-6-oxoheptanedioate        | C11H12NO8      | C04462  |
| 479 | so3          | Sulfite                                        | O3S            | C00094  |
| 480 | so4          | Sulfate                                        | O4S            | C00059  |
| 481 | so4          | Sulfate                                        | O4S            | C00059  |
| 482 | strcoa       | Stearyl-CoA (n-C18:0CoA)                       | C39H70N7O17P3S | C00412  |
| 483 | succ         | Succinate                                      | C4H4O4         | C00042  |
| 484 | succoa       | Succinyl-CoA                                   | C25H35N7O19P3S | C00091  |
| 485 | sucsal       | Succinic semialdehyde                          | C4H5O3         | C00232  |
| 486 | tag6p-D      | D-Tagatose 6-phosphate                         | C6H11O9P       | C01097  |
| 487 | tagdp-D      | D-Tagatose 1,6-biphosphate                     | C6H10O12P2     | C03785  |
| 488 | tdcoa        | Tetradecanoyl-CoA (n-C14:0CoA)                 | C35H58N7O17P3S | C02593  |
| 489 | tdeACP       | Tetradecenoyl-ACP (n-C14:1ACP)                 | C25H45N2O8PRS  | 0       |
| 490 | thdp         | 2,3,4,5-Tetrahydrodipicolinate                 | C7H7NO4        | C03972  |
| 491 | thf          | 5,6,7,8-Tetrahydrofolate                       | C19H21N7O6     | C00101  |



| No  | Abbreviation | Name                      | Formula       | KEGG ID |
|-----|--------------|---------------------------|---------------|---------|
| 492 | thmmp        | Thiamin monophosphate     | C12H16N4O4PS  | C01081  |
| 493 | thmpp        | Thiamine diphosphate      | C12H16N4O7P2S | C00068  |
| 494 | thr-L        | L-Threonine               | C4H9NO3       | C00188  |
| 495 | thr-LA       | L-Allo-threonine          | C4H9NO3       | C05519  |
| 496 | thrp         | L-Threonine O-3-phosphate | C4H8NO6P      | C12147  |
| 497 | thrtRNA      | L-Threonyl-tRNA(Thr)      | C4H8NO2R      | C02992  |
| 498 | thymd        | Thymidine                 | C10H14N2O5    | C00214  |
| 499 | trdox        | Oxidized thioredoxin      | X             | C00343  |
| 500 | trdrd        | Reduced thioredoxin       | XH2           | C00342  |
| 501 | trnaala      | tRNA(Ala)                 | R             | C01635  |
| 502 | trnaarg      | tRNA(Arg)                 | R             | C01636  |
| 503 | trnaasp      | tRNA(Asp)                 | R             | C01638  |
| 504 | trnacys      | tRNA(Cys)                 | R             | C01639  |
| 505 | trnagln      | tRNA(Gln)                 | R             | C01640  |
| 506 | trnaglu      | tRNA (Glu)                | R             | C01641  |
| 507 | trnagly      | tRNA(Gly)                 | R             | C01642  |
| 508 | trnahis      | tRNA(His)                 | R             | C01643  |
| 509 | trnaile      | tRNA(Ile)                 | R             | C01644  |
| 510 | trnaleu      | tRNA(Leu)                 | R             | C01645  |
| 511 | trnalys      | tRNA(Lys)                 | R             | C01646  |
| 512 | trnamet      | tRNA(Met)                 | R             | C01647  |
| 513 | trnaphe      | tRNA(Phe)                 | R             | C01648  |
| 514 | trnapro      | tRNA(Pro)                 | R             | C01649  |
| 515 | trnaser      | tRNA(Ser)                 | R             | C01650  |

| No  | Abbreviation | Name                                            | Formula                                                                       | KEGG ID |
|-----|--------------|-------------------------------------------------|-------------------------------------------------------------------------------|---------|
| 516 | trnathr      | tRNA(Thr)                                       | R                                                                             | C01651  |
| 517 | trnatrp      | tRNA(Trp)                                       | R                                                                             | C01652  |
| 518 | trnatyr      | tRNA(Tyr)                                       | R                                                                             | C00787  |
| 519 | trnaval      | tRNA(Val)                                       | R                                                                             | C01653  |
| 520 | trp-L        | L-Tryptophan                                    | C <sub>11</sub> H <sub>12</sub> N <sub>2</sub> O <sub>2</sub>                 | C00078  |
| 521 | trptrna      | L-Tryptophanyl-tRNA(Trp)                        | C <sub>11</sub> H <sub>11</sub> N <sub>2</sub> O <sub>R</sub>                 | C03512  |
| 522 | tsul         | Thiosulfate                                     | O <sub>3</sub> S <sub>2</sub>                                                 | C00320  |
| 523 | tsul         | Thiosulfate                                     | O <sub>3</sub> S <sub>2</sub>                                                 | C00320  |
| 524 | ttdca        | tetradecanoate (C14:0)                          | C <sub>14</sub> H <sub>27</sub> O <sub>2</sub>                                | C06424  |
| 525 | tyr-L        | L-Tyrosine                                      | C <sub>9</sub> H <sub>11</sub> N <sub>O</sub> <sub>3</sub>                    | C00082  |
| 526 | tyrtrna      | L-Tyrosyl-tRNA(Tyr)                             | C <sub>9</sub> H <sub>10</sub> N <sub>O</sub> <sub>2</sub> <sub>R</sub>       | C02839  |
| 527 | u23ga        | UDP-2,3-bis(3-hydroxytetradecanoyl)glucosamine  | C <sub>43</sub> H <sub>75</sub> N <sub>3</sub> O <sub>20</sub> P <sub>2</sub> | C04652  |
| 528 | uaccg        | UDP-N-acetyl-3-O-(1-carboxyvinyl)-D-glucosamine | C <sub>20</sub> H <sub>26</sub> N <sub>3</sub> O <sub>19</sub> P <sub>2</sub> | C04631  |
| 529 | uacgam       | UDP-N-acetyl-D-glucosamine                      | C <sub>17</sub> H <sub>25</sub> N <sub>3</sub> O <sub>17</sub> P <sub>2</sub> | C00043  |
| 530 | uamr         | UDP-N-acetylmuramate                            | C <sub>20</sub> H <sub>28</sub> N <sub>3</sub> O <sub>19</sub> P <sub>2</sub> | C01050  |
| 531 | ubq8         | Ubiquinone-8                                    | C <sub>49</sub> H <sub>74</sub> O <sub>4</sub>                                | C00399  |
| 532 | ubq8h2       | Ubiquinol-8                                     | C <sub>49</sub> H <sub>76</sub> O <sub>4</sub>                                | C00399  |
| 533 | udcpdp       | Undecaprenyl diphosphate                        | C <sub>55</sub> H <sub>89</sub> O <sub>7</sub> P <sub>2</sub>                 | C03543  |
| 534 | udp          | UDP                                             | C <sub>9</sub> H <sub>11</sub> N <sub>2</sub> O <sub>12</sub> P <sub>2</sub>  | C00015  |
| 535 | udpg         | UDPglucose                                      | C <sub>15</sub> H <sub>22</sub> N <sub>2</sub> O <sub>17</sub> P <sub>2</sub> | C00029  |

| No  | Abbreviation | Name                    | Formula                                                                       | KEGG ID |
|-----|--------------|-------------------------|-------------------------------------------------------------------------------|---------|
| 536 | udpgal       | UDPgaltactose           | C <sub>15</sub> H <sub>22</sub> N <sub>2</sub> O <sub>17</sub> P <sub>2</sub> | C00052  |
| 537 | ump          | UMP                     | C <sub>9</sub> H <sub>11</sub> N <sub>2</sub> O <sub>9</sub> P                | C00105  |
| 538 | uppg3        | Uroporphyrinogen III    | C <sub>40</sub> H <sub>36</sub> N <sub>4</sub> O <sub>16</sub>                | C01051  |
| 539 | ura          | Uracil                  | C <sub>4</sub> H <sub>4</sub> N <sub>2</sub> O <sub>2</sub>                   | C00106  |
| 540 | urea         | Urea                    | CH <sub>4</sub> N <sub>2</sub> O                                              | C00086  |
| 541 | utp          | UTP                     | C <sub>9</sub> H <sub>11</sub> N <sub>2</sub> O <sub>15</sub> P <sub>3</sub>  | C00075  |
| 542 | val-L        | L-Valine                | C <sub>5</sub> H <sub>11</sub> NO <sub>2</sub>                                | C00183  |
| 543 | val-L        | L-Valine                | C <sub>5</sub> H <sub>11</sub> NO <sub>2</sub>                                | C00183  |
| 544 | valtrna      | L-Valyl-tRNA(Val)       | C <sub>5</sub> H <sub>10</sub> NOR                                            | C02554  |
| 545 | xmp          | Xanthosine 5'-phosphate | C <sub>10</sub> H <sub>11</sub> N <sub>4</sub> O <sub>9</sub> P               | C00655  |
| 546 | xtp          | XTP                     | C <sub>10</sub> H <sub>11</sub> N <sub>4</sub> O <sub>15</sub> P <sub>3</sub> | C00700  |
| 547 | xu5p-D       | D-Xylulose 5-phosphate  | C <sub>5</sub> H <sub>9</sub> O <sub>8</sub> P                                | C00231  |
| 548 | zn2          | Zinc                    | Zn                                                                            | C00038  |
| 549 | zn2          | Zinc                    | Zn                                                                            | C00038  |

**Table 13. Core Reductive Dehalogenase Homologous (*rdh*) Genes of *i*AI549**

| No | Annotation                                        | CBDB1 gene locus | 195 gene locus | BAV1 gene locus | VS gene locus |
|----|---------------------------------------------------|------------------|----------------|-----------------|---------------|
| 1  | putative reductive dehalogenase                   | cbdbA187         | DET0180        | DehaBAV1_0173   | VS169         |
| 2  | putative reductive dehalogenase anchoring protein | cbdbA188         | DET0181        | DehaBAV1_0172   | VS170         |
| 3  | putative reductive dehalogenase                   | cbdbA238         | DET0302        | DehaBAV1_0121   | VS1353        |
| 4  | putative reductive dehalogenase anchoring protein | cbdbA239         | DET0303        | DehaBAV1_0120   | VS1352        |
| 5  | putative reductive dehalogenase                   | cbdbA1092        | DET1171        | DehaBAV1_0988   | VS1360        |
| 6  | putative reductive dehalogenase anchoring protein | cbdbA1094        | DET1170        | DehaBAV1_0989   | VS1359        |
| 7  | putative reductive dehalogenase                   | cbdbA96          | DET0318        | DehaBAV1_0112   | VS1387        |
| 8  | putative reductive dehalogenase                   | cbdbA243         | DET0235        | DehaBAV1_0119   | VS1347        |
| 9  | putative reductive dehalogenase anchoring protein | cbdbA1637        | DET1544        | DehaBAV1_0282   | VS1435        |

**Table 14. Dispensable Reductive Dehalogenase Homologous (*rdh*) Genes of *i*AI549**

| No | Annotation                                         | CBDB1 gene locus | 195 gene locus | BAV1 gene locus | VS gene locus |
|----|----------------------------------------------------|------------------|----------------|-----------------|---------------|
| 1  | putative reductive dehalogenase                    | cbdbA1453        | DET1535        | No gene         | VS1427        |
| 2  | putative reductive dehalogenase anchoring protein  | cbdbA1454        | No gene        | No gene         | VS1262        |
| 3  | reductive dehalogenase anchoring protein, putative | cbdbA1490        | DET1537        | No gene         | VS1429        |
| 4  | trichloroethene reductive dehalogenase             | cbdbA1491        | DET1538        | No gene         | VS1430        |
| 5  | reductive dehalogenase anchoring protein, putative | cbdbB33          | DET0307        | DehaBAV1_0283   | No gene       |
| 6  | trichloroethene reductive dehalogenase             | cbdbA1495        | DET0306        | No gene         | No gene       |
| 7  | putative reductive dehalogenase anchoring protein  | cbdbA1545        | No gene        | No gene         | VS1363        |
| 8  | reductive dehalogenase                             | cbdbA1546        | DET1519        | No gene         | VS1364        |
| 9  | putative reductive dehalogenase anchoring protein  | cbdbA1549        | DET1521        | No gene         | VS1377        |
| 10 | putative reductive dehalogenase                    | cbdbA1550        | DET1522        | No gene         | VS1378        |
| 11 | putative reductive dehalogenase anchoring protein  | cbdbA1569        | DET1521        | No gene         | VS1377        |

| No | Annotation                                        | CBDB1 gene locus | 195 gene locus | BAV1 gene locus | VS gene locus |
|----|---------------------------------------------------|------------------|----------------|-----------------|---------------|
| 12 | putative reductive dehalogenase                   | cbdbA1570        | DET1522        | No gene         | VS1378        |
| 13 | putative reductive dehalogenase anchoring protein | cbdbA1573        | DET1518        | No gene         | VS1374        |
| 14 | putative reductive dehalogenase                   | cbdbA1575        | DET1519        | No gene         | VS1375        |
| 15 | putative reductive dehalogenase anchoring protein | cbdbA1581        | No gene        | No gene         | VS1386        |
| 16 | reductive dehalogenase homologous protein         | cbdbA1582        | No gene        | DehaBAV1_0112   | VS1387        |
| 17 | putative reductive dehalogenase anchoring protein | cbdbA1587        | DET0319        | No gene         | VS1392        |
| 18 | putative reductive dehalogenase                   | cbdbA1588        | DET0318        | No gene         | VS1393        |
| 19 | putative reductive dehalogenase anchoring protein | cbdbA1594        | DET1534        | No gene         | VS1315        |
| 20 | reductive dehalogenase                            | cbdbA1595        | DET1535        | No gene         | VS1316        |
| 21 | putative reductive dehalogenase anchoring protein | cbdbA1597        | No gene        | No gene         | VS1401        |
| 22 | putative reductive dehalogenase                   | cbdbA1598        | No gene        | No gene         | VS1402        |
| 23 | putative reductive dehalogenase anchoring protein | cbdbA1617        | No gene        | No gene         | VS1420        |
| 24 | putative reductive dehalogenase                   | cbdbA1618        | No gene        | No gene         | VS1421        |

| No | Annotation                                         | CBDB1 gene locus | 195 gene locus | BAV1 gene locus | VS gene locus |
|----|----------------------------------------------------|------------------|----------------|-----------------|---------------|
| 25 | putative reductive dehalogenase anchoring protein  | cbdbA1623        | No gene        | DehaBAV1_0111   | VS1426        |
| 26 | putative reductive dehalogenase                    | cbdbA1624        | DET1535        | No gene         | VS1427        |
| 27 | putative reductive dehalogenase anchoring protein  | cbdbA1626        | DET1537        | No gene         | VS1429        |
| 28 | putative reductive dehalogenase                    | cbdbA1627        | DET1538        | No gene         | VS1430        |
| 29 | hypothetical protein                               | No gene          | No gene        | DehaBAV1_0277   | VS103         |
| 30 | reductive dehalogenase                             | No gene          | No gene        | DehaBAV1_0276   | VS104         |
| 31 | reductive dehalogenase homologous protein          | cbdbA80          | DET1559        | No gene         | No gene       |
| 32 | putative reductive dehalogenase                    | cbdbA84          | No gene        | No gene         | VS1342        |
| 33 | putative reductive dehalogenase                    | cbdbA88          | DET0311        | DehaBAV1_0104   | No gene       |
| 34 | putative reductive dehalogenase                    | cbdbA1455        | No gene        | No gene         | VS1263        |
| 35 | putative reductive dehalogenase anchoring protein  | cbdbA1507        | DET0319        | No gene         | VS1392        |
| 36 | putative reductive dehalogenase anchoring protein  | cbdbA1536        | No gene        | No gene         | VS1386        |
| 37 | putative reductive dehalogenase                    | cbdbA1539        | No gene        | DehaBAV1_0173   | No gene       |
| 38 | reductive dehalogenase anchoring protein, putative | cbdbA1541        | No gene        | DehaBAV1_0297   | VS87          |

| No | Annotation                                         | CBDB1 gene locus | 195 gene locus | BAV1 gene locus | VS gene locus |
|----|----------------------------------------------------|------------------|----------------|-----------------|---------------|
| 39 | putative reductive dehalogenase                    | cbdbA1578        | No gene        | No gene         | VS1383        |
| 40 | reductive dehalogenase homologous protein          | cbdbA1638        | DET1545        | No gene         | VS1436        |
| 41 | trichloroethene reductive dehalogenase             | No gene          | DET0079        | DehaBAV1_0847   | VS1291        |
| 42 | reductive dehalogenase anchoring protein, putative | No gene          | DET0312        | DehaBAV1_0103   | No gene       |
| 43 | reductive dehalogenase                             | No gene          | No gene        | DehaBAV1_0281   | VS99          |
| 44 | reductive dehalogenase                             | No gene          | No gene        | DehaBAV1_0284   | VS96          |
| 45 | reductive dehalogenase                             | No gene          | No gene        | DehaBAV1_0296   | VS88          |



**Table 15. Unique Reductive Dehalogenase Homologous (*rdh*) Genes of *i*AI549**

| No | Annotation                                        | CBDB1 gene locus | 195 gene locus | BAV1 gene locus | VS gene locus |
|----|---------------------------------------------------|------------------|----------------|-----------------|---------------|
| 1  | putative reductive dehalogenase anchoring protein | cbdbA1502        | No gene        | No gene         | No gene       |
| 2  | putative reductive dehalogenase                   | cbdbA1503        | No gene        | No gene         | No gene       |
| 3  | putative reductive dehalogenase anchoring protein | cbdbA1559        | No gene        | No gene         | No gene       |
| 4  | putative reductive dehalogenase                   | cbdbA1560        | No gene        | No gene         | No gene       |
| 5  | putative reductive dehalogenase anchoring protein | cbdbA1562        | No gene        | No gene         | No gene       |
| 6  | putative reductive dehalogenase                   | cbdbA1563        | No gene        | No gene         | No gene       |
| 7  | reductive dehalogenase                            | No gene          | No gene        | No gene         | VS1340        |
| 8  | putative reductive dehalogenase anchoring protein | No gene          | No gene        | No gene         | VS1341        |
| 9  | putative reductive dehalogenase anchoring protein | No gene          | No gene        | No gene         | VS1319        |
| 10 | reductive dehalogenase                            | No gene          | No gene        | No gene         | VS1320        |
| 11 | putative reductive dehalogenase anchoring protein | No gene          | No gene        | No gene         | VS81          |
| 12 | reductive dehalogenase                            | No gene          | No gene        | No gene         | VS82          |
| 13 | putative reductive dehalogenase anchoring protein | cbdbA85          | No gene        | No gene         | No gene       |

| No | Annotation                                                         | CBDB1 gene locus | 195 gene locus | BAV1 gene locus | VS gene locus |
|----|--------------------------------------------------------------------|------------------|----------------|-----------------|---------------|
| 14 | putative reductive dehalogenase anchoring protein                  | cbdbA1452        | No gene        | No gene         | No gene       |
| 15 | putative reductive dehalogenase                                    | cbdbA1508        | No gene        | No gene         | No gene       |
| 16 | putative reductive dehalogenase                                    | cbdbA1535        | No gene        | No gene         | No gene       |
| 17 | reductive dehalogenase-homologous N-terminal fragment              | cbdbA1540        | No gene        | No gene         | No gene       |
| 18 | putative reductive dehalogenase                                    | cbdbA1542        | No gene        | No gene         | No gene       |
| 19 | putative reductive dehalogenase anchoring protein                  | cbdbA1577        | No gene        | No gene         | No gene       |
| 20 | reductive dehalogenase domain protein                              | No gene          | DET0088        | No gene         | No gene       |
| 21 | reductive dehalogenase, putative                                   | No gene          | DET0173        | No gene         | No gene       |
| 22 | trichloroethene reductive dehalogenase anchoring protein, putative | No gene          | DET0078        | No gene         | No gene       |
| 23 | reductive dehalogenase, putative                                   | No gene          | DET0876        | No gene         | No gene       |
| 24 | reductive dehalogenase, putative                                   | No gene          | DET1528        | No gene         | No gene       |
| 25 | reductive dehalogenase anchoring protein, putative                 | No gene          | DET0163        | No gene         | No gene       |

| No | Annotation                                         | CBDB1 gene locus | 195 gene locus | BAV1 gene locus | VS gene locus |
|----|----------------------------------------------------|------------------|----------------|-----------------|---------------|
| 26 | reductive dehalogenase anchoring protein, putative | No gene          | DET0175        | No gene         | No gene       |
| 27 | reductive dehalogenase anchoring protein, putative | No gene          | DET0236        | No gene         | No gene       |
| 28 | reductive dehalogenase anchoring protein, putative | No gene          | DET0875        | No gene         | No gene       |
| 29 | reductive dehalogenase anchoring protein, putative | No gene          | DET1527        | No gene         | No gene       |
| 30 | reductive dehalogenase anchoring protein, putative | No gene          | DET1558        | No gene         | No gene       |
| 31 | hypothetical protein                               | No gene          | No gene        | DehaBAV1_0118   | No gene       |
| 32 | reductive dehalogenase                             | No gene          | No gene        | No gene         | VS1260        |
| 33 | putative reductive dehalogenase                    | No gene          | No gene        | No gene         | VS1261        |
| 34 | reductive dehalogenase                             | No gene          | No gene        | No gene         | VS1349        |
| 35 | reductive dehalogenase                             | No gene          | No gene        | No gene         | VS1344        |
| 36 | reductive dehalogenase                             | No gene          | No gene        | No gene         | VS1329        |
| 37 | reductive dehalogenase                             | No gene          | No gene        | No gene         | VS1327        |
| 38 | reductive dehalogenase                             | No gene          | No gene        | No gene         | VS1314        |

| No | Annotation                                        | CBDB1 gene locus | 195 gene locus | BAV1 gene locus | VS gene locus |
|----|---------------------------------------------------|------------------|----------------|-----------------|---------------|
| 39 | putative reductive dehalogenase anchoring protein | No gene          | No gene        | No gene         | VS1382        |
| 40 | putative reductive dehalogenase anchoring protein | No gene          | No gene        | No gene         | VS1370        |
| 41 | putative reductive dehalogenase anchoring protein | No gene          | No gene        | No gene         | VS1339        |
| 42 | putative reductive dehalogenase anchoring protein | No gene          | No gene        | No gene         | VS1334        |
| 43 | putative reductive dehalogenase anchoring protein | No gene          | No gene        | No gene         | VS1328        |
| 44 | putative reductive dehalogenase anchoring protein | No gene          | No gene        | No gene         | VS1326        |
| 45 | putative reductive dehalogenase anchoring protein | No gene          | No gene        | No gene         | VS1323        |
| 46 | putative reductive dehalogenase anchoring protein | No gene          | No gene        | No gene         | VS1313        |
| 47 | putative reductive dehalogenase anchoring protein | No gene          | No gene        | No gene         | VS1307        |

**Table 16. List of Core Hypothetical Genes of *Dehalococcoides* Pan-genome**

| No | CBDB1 core hypothetical genes | 195 core hypothetical genes | BAV1 core hypothetical genes | VS core hypothetical genes | CBDB1 annotation                                | 195 annotation                       | BAV1 annotation                    | VS annotation                      |
|----|-------------------------------|-----------------------------|------------------------------|----------------------------|-------------------------------------------------|--------------------------------------|------------------------------------|------------------------------------|
| 1  | cbdbA2                        | DET0002                     | DehaBAV1_0002                | VS2                        | spo0b-associated GTP-binding protein            | GTP-binding protein, GTP1/OBG family | small GTP-binding protein          | small GTP-binding protein          |
| 2  | cbdbA10                       | DET0008                     | DehaBAV1_0008                | VS8                        | conserved hypothetical membrane protein         | hypothetical protein                 | protein of unknown function DUF205 | protein of unknown function DUF205 |
| 3  | cbdbA13                       | DET0012                     | DehaBAV1_0011                | VS11                       | conserved hypothetical protein                  | hypothetical protein                 | protein of unknown function DUF951 | protein of unknown function DUF951 |
| 4  | cbdbA15                       | DET0014                     | DehaBAV1_0013                | VS13                       | hypothetical protein                            | hypothetical protein                 | hypothetical protein               | conserved hypothetical protein     |
| 5  | cbdbA17                       | DET0015                     | DehaBAV1_0014                | VS14                       | putative lipoprotein                            | lipoprotein, putative                | hypothetical protein               | putative lipoprotein               |
| 6  | cbdbA19                       | DET0017                     | DehaBAV1_0016                | VS16                       | hypothetical protein                            | hypothetical protein                 | hypothetical protein               | conserved hypothetical protein     |
| 7  | cbdbA20                       | DET0018                     | DehaBAV1_0017                | VS17                       | hypothetical protein                            | hypothetical protein                 | hypothetical protein               | conserved hypothetical protein     |
| 8  | cbdbA26                       | DET0021                     | DehaBAV1_0020                | VS20                       | conserved hypothetical protein                  | hypothetical protein                 | hypothetical protein               | hypothetical protein               |
| 9  | cbdbA25                       | DET0022                     | DehaBAV1_0021                | VS21                       | hypothetical protein                            | hypothetical protein                 | hypothetical protein               | conserved hypothetical protein     |
| 10 | cbdbA27                       | DET0023                     | DehaBAV1_0022                | VS22                       | hypothetical protein                            | hypothetical protein                 | hypothetical protein               | conserved hypothetical protein     |
| 11 | cbdbA32                       | DET0026                     | DehaBAV1_0025                | VS25                       | putative potassium uptake protein, TrkA homolog | potassium uptake protein, putative   | TrkA-N domain protein              | TrkA-N domain protein              |
| 12 | cbdbA33                       | DET0027                     | DehaBAV1_0026                | VS26                       | putative potassium uptake protein, fragment     | potassium uptake protein, putative   | TrkA-N domain protein              | TrkA-N domain protein              |

| No | CBDB1 core hypothetical genes | 195 core hypothetical genes | BAV1 core hypothetical genes | VS core hypothetical genes | CBDB1 annotation                                  | 195 annotation                                | BAV1 annotation                     | VS annotation                      |
|----|-------------------------------|-----------------------------|------------------------------|----------------------------|---------------------------------------------------|-----------------------------------------------|-------------------------------------|------------------------------------|
| 13 | cbdbA35                       | DET0029                     | DehaBAV1_0028                | VS28                       | putative Trk system potassium uptake protein      | Trk system potassium uptake protein, putative | cation transporter                  | cation transporter                 |
| 14 | cbdbA37                       | DET0030                     | DehaBAV1_0029                | VS29                       | putative potassium uptake protein, TrkA homologue | potassium uptake protein TrkA, putative       | TrkA-N domain protein               | TrkA-N domain protein              |
| 15 | cbdbA40                       | DET0033                     | DehaBAV1_0030                | VS31                       | conserved hypothetical protein                    | hypothetical protein                          | protein of unknown function DUF47   | protein of unknown function DUF47  |
| 16 | cbdbA41                       | DET0034                     | DehaBAV1_0031                | VS32                       | putative phosphate transporter                    | phosphate transporter                         | phosphate transporter               | phosphate transporter              |
| 17 | cbdbA43                       | DET0036                     | DehaBAV1_0033                | VS34                       | conserved hypothetical protein                    | hypothetical protein                          | protein of unknown function DUF370  | protein of unknown function DUF370 |
| 18 | cbdbA48                       | DET0039                     | DehaBAV1_0036                | VS37                       | conserved domain protein                          | hypothetical protein                          | hypothetical protein                | hypothetical protein               |
| 19 | cbdbA50                       | DET0040                     | DehaBAV1_0037                | VS40                       | hypothetical protein                              | hypothetical protein                          | hypothetical protein                | conserved hypothetical protein     |
| 20 | cbdbA54                       | DET0043                     | DehaBAV1_0039                | VS42                       | conserved hypothetical membrane protein           | hypothetical protein                          | hypothetical protein                | hypothetical protein               |
| 21 | cbdbA55                       | DET0044                     | DehaBAV1_0040                | VS43                       | conserved hypothetical protein                    | hypothetical protein                          | protein of unknown function DUF1025 | hypothetical protein               |
| 22 | cbdbA56                       | DET0045                     | DehaBAV1_0041                | VS44                       | redox family protein                              | redox family protein                          | C_GCxG_C_C family protein           | redox family protein               |
| 23 | cbdbA58                       | DET0046                     | DehaBAV1_0042                | VS45                       | putative GTP-binding protein                      | GTP-binding protein, putative                 | Protein of unknown function DUF933  | Radical SAM domain protein         |
| 24 | cbdbA62                       | DET0048                     | DehaBAV1_0045                | VS48                       | conserved hypothetical membrane protein           | hypothetical protein                          | hypothetical protein                | conserved hypothetical protein     |
| 25 | cbdbA67                       | DET0051                     | DehaBAV1_0048                | VS51                       | conserved hypothetical protein                    | conserved hypothetical protein TIGR00250      | Holliday junction resolvase YqgF    | Holliday junction resolvase YqgF   |
| 26 | cbdbA1485                     | DET0253                     | DehaBAV1_0074                | VS1298                     | hypothetical protein                              | DNA primase domain protein                    | hypothetical protein                | conserved hypothetical protein     |
| 27 | cbdbA87                       | DET1556                     | DehaBAV1_0102                | VS1356                     | conserved hypothetical protein                    | hypothetical protein                          | protein of unknown function DUF105  | protein of unknown function DUF105 |
| 28 | cbdbA95                       | DET0238                     | DehaBAV1_0110                | VS1384                     | conserved hypothetical protein                    | hypothetical protein                          | putative ATP binding protein        | putative ATP binding protein       |

| No | CBDB1 core hypothetical genes | 195 core hypothetical genes | BAV1 core hypothetical genes | VS core hypothetical genes | CBDB1 annotation                                                          | 195 annotation                             | BAV1 annotation                     | VS annotation                       |
|----|-------------------------------|-----------------------------|------------------------------|----------------------------|---------------------------------------------------------------------------|--------------------------------------------|-------------------------------------|-------------------------------------|
| 29 | cbdbA97                       | DET0308                     | DehaBAV1_0113                | VS1385                     | conserved hypothetical protein probable peptidase M14, carboxypeptidase A | hypothetical protein                       | protein of unknown function UPF0153 | conserved hypothetical protein      |
| 30 | cbdbA232                      | DET0230                     | DehaBAV1_0125                | VS204                      | hypothetical protein                                                      | TM2 domain protein                         | TM2 domain containing protein+B7201 | TM2 domain containing protein+B7201 |
| 31 | cbdbA229                      | DET0228                     | DehaBAV1_0127                | VS203                      | hypothetical protein                                                      | hypothetical protein                       | hypothetical protein                | conserved hypothetical protein      |
| 32 | cbdbA228                      | DET0226                     | DehaBAV1_0128                | VS202                      | conserved hypothetical protein                                            | hypothetical protein                       | HI0933 family protein               | HI0933 family protein               |
| 33 | cbdbA227                      | DET0225                     | DehaBAV1_0129                | VS201                      | hypothetical protein                                                      | lipoprotein, putative                      | hypothetical protein                | conserved hypothetical protein      |
| 34 | cbdbA226                      | DET0224                     | DehaBAV1_0130                | VS200                      | ABC transporter, ATP-binding protein                                      | ABC transporter, ATP-binding protein       | ABC transporter related             | ABC transporter related             |
| 35 | cbdbA225                      | DET0223                     | DehaBAV1_0131                | VS199                      | Hly-III family related protein                                            | hemolysin, putative                        | Hly-III family protein              | Hly-III family protein              |
| 36 | cbdbA215                      | DET0217                     | DehaBAV1_0136                | VS194                      | oxidoreductase, aldo reductase                                            | oxidoreductase, aldo/keto reductase family | aldo/keto reductase                 | aldo/keto reductase                 |
| 37 | cbdbA212                      | DET0201                     | DehaBAV1_0152                | VS189                      | probable glycosyltransferase                                              | glycosyl hydrolase domain protein          | glycosyl transferase, group 1       | glycosyl transferase, group 1       |
| 38 | cbdbA209                      | DET0200                     | DehaBAV1_0153                | VS188                      | hypothetical membrane protein                                             | hypothetical protein                       | Protein of unknown function DUF1616 | Protein of unknown function DUF1616 |
| 39 | cbdbA207                      | DET0198                     | DehaBAV1_0155                | VS186                      | glutaredoxin family protein                                               | glutaredoxin family protein                | glutaredoxin                        | glutaredoxin                        |
| 40 | cbdbA206                      | DET0197                     | DehaBAV1_0156                | VS185                      | conserved hypothetical protein                                            | hypothetical protein                       | hypothetical protein                | conserved hypothetical protein      |
| 41 | cbdbA203                      | DET0195                     | DehaBAV1_0158                | VS183                      | conserved hypothetical protein                                            | hypothetical protein                       | HI0933 family protein               | HI0933 family protein               |
| 42 | cbdbA190                      | DET0184                     | DehaBAV1_0168                | VS173                      | membrane protein, TerC family                                             | membrane protein, TerC family              | Integral membrane protein TerC      | Integral membrane protein TerC      |
| 43 | cbdbA186                      | DET0179                     | DehaBAV1_0174                | VS168                      | conserved hypothetical protein                                            | hypothetical protein                       | hypothetical protein                | conserved hypothetical protein      |

| No | CBDB1 core hypothetical genes | 195 core hypothetical genes | BAV1 core hypothetical genes | VS core hypothetical genes | CBDB1 annotation                          | 195 annotation                            | BAV1 annotation                                 | VS annotation                                   |
|----|-------------------------------|-----------------------------|------------------------------|----------------------------|-------------------------------------------|-------------------------------------------|-------------------------------------------------|-------------------------------------------------|
| 44 | cbdbA180                      | DET0152                     | DehaBAV1_0219                | VS160                      | conserved hypothetical membrane protein   | hypothetical protein                      | protein of unknown function DUF6, transmembrane | protein of unknown function DUF6, transmembrane |
| 45 | cbdbA178                      | DET0151                     | DehaBAV1_0220                | VS159                      | conserved hypothetical protein            | hypothetical protein                      | protein of unknown function DUF45               | protein of unknown function DUF45               |
| 46 | cbdbA176                      | DET0150                     | DehaBAV1_0221                | VS158                      | conserved hypothetical protein            | hypothetical protein                      | hypothetical protein                            | conserved hypothetical protein                  |
| 47 | cbdbA168                      | DET0143                     | DehaBAV1_0227                | VS151                      | arsenate reductase                        | arsenate reductase( EC:1.20.4.1 )         | protein tyrosine phosphatase                    | protein tyrosine phosphatase                    |
| 48 | cbdbA156                      | DET0133                     | DehaBAV1_0237                | VS141                      | hypothetical protein                      | hypothetical protein                      | hypothetical protein                            | conserved hypothetical protein                  |
| 49 | cbdbA150                      | DET0129                     | DehaBAV1_0242                | VS136                      | conserved hypothetical protein            | conserved hypothetical protein TIGR00149  | protein of unknown function UPF0047             | protein of unknown function UPF0047             |
| 50 | cbdbA142                      | DET0121                     | DehaBAV1_0248                | VS130                      | conserved hypothetical protein            | hypothetical protein                      | hypothetical protein                            | conserved hypothetical protein                  |
| 51 | cbdbA124                      | DET0105                     | DehaBAV1_0262                | VS116                      | degV family protein                       | degV family protein                       | degV family protein                             | degV family protein                             |
| 52 | cbdbA116                      | DET0100                     | DehaBAV1_0268                | VS110                      | hypothetical membrane protein             | hypothetical protein                      | hypothetical protein                            | conserved hypothetical membrane protein         |
| 53 | cbdbA113                      | DET0098                     | DehaBAV1_0270                | VS108                      | conserved hypothetical protein            | hypothetical protein                      | hypothetical protein                            | conserved hypothetical protein                  |
| 54 | cbdbA263                      | DET0325                     | DehaBAV1_0304                | VS266                      | patatin-like phospholipase family protein | patatin-like phospholipase family protein | Patatin                                         | Patatin                                         |
| 55 | cbdbA264                      | DET0144                     | DehaBAV1_0305                | VS267                      | acetyltransferase, GNAT family            | acetyltransferase, GNAT family            | GCN5-related N-acetyltransferase                | GCN5-related N-acetyltransferase                |
| 56 | cbdbA266                      | DET0326                     | DehaBAV1_0306                | VS268                      | conserved hypothetical protein            | hypothetical protein                      | protein of unknown function DUF87               | protein of unknown function DUF87               |
| 57 | cbdbA267                      | DET0327                     | DehaBAV1_0307                | VS269                      | conserved hypothetical protein            | hypothetical protein                      | hypothetical protein                            | conserved hypothetical protein                  |
| 58 | cbdbA268                      | DET0328                     | DehaBAV1_0308                | VS270                      | conserved hypothetical protein            | hypothetical protein                      | hypothetical protein                            | conserved hypothetical protein                  |
| 59 | cbdbA269                      | DET0329                     | DehaBAV1_0309                | VS271                      | transporter, LysE family                  | transporter, LysE family                  | Lysine exporter protein (LYSE/YGGA)             | Lysine exporter protein (LYSE/YGGA)             |
| 60 | cbdbA270                      | DET0330                     | DehaBAV1_0310                | VS272                      | histone deacetylase family protein        | histone deacetylase family protein        | histone deacetylase superfamily                 | histone deacetylase superfamily                 |



| No | CBDB1 core hypothetical genes | 195 core hypothetical genes | BAV1 core hypothetical genes | VS core hypothetical genes | CBDB1 annotation                                   | 195 annotation                                     | BAV1 annotation                                                      | VS annotation                                                        |
|----|-------------------------------|-----------------------------|------------------------------|----------------------------|----------------------------------------------------|----------------------------------------------------|----------------------------------------------------------------------|----------------------------------------------------------------------|
| 61 | cbdbA280                      | DET0340                     | DehaBAV1_0319                | VS281                      | conserved hypothetical protein                     | MraZ                                               | MraZ protein                                                         | MraZ protein                                                         |
| 62 | cbdbA286                      | DET0344                     | DehaBAV1_0323                | VS285                      | conserved hypothetical protein                     | conserved hypothetical protein TIGR00244           | ATP-cone domain protein                                              | ATP-cone domain protein                                              |
| 63 | cbdbA289                      | DET0347                     | DehaBAV1_0326                | VS287                      | conserved hypothetical protein                     | hypothetical protein                               | protein of unknown function DUF88                                    | protein of unknown function DUF88                                    |
| 64 | cbdbA290                      | DET0348                     | DehaBAV1_0327                | VS288                      | radical SAM domain protein                         | radical SAM domain protein                         | Radical SAM domain protein                                           | Radical SAM domain protein                                           |
| 65 | cbdbA294                      | DET0352                     | DehaBAV1_0330                | VS291                      | conserved hypothetical protein                     | hypothetical protein                               | hypothetical protein                                                 | conserved hypothetical protein                                       |
| 66 | cbdbA296                      | DET0357                     | DehaBAV1_0339                | VS300                      | hypothetical protein                               | hypothetical protein                               | hypothetical protein                                                 | conserved hypothetical protein                                       |
| 67 | cbdbA297                      | DET0358                     | DehaBAV1_0340                | VS301                      | hypothetical protein                               | hypothetical protein                               | hypothetical protein                                                 | conserved hypothetical protein                                       |
| 68 | cbdbA298                      | DET0359                     | DehaBAV1_0341                | VS302                      | conserved hypothetical protein                     | hypothetical protein                               | protein of unknown function DUF164                                   | protein of unknown function DUF164                                   |
| 69 | cbdbA300                      | DET0362                     | DehaBAV1_0343                | VS305                      | hypothetical protein                               | hypothetical protein                               | hypothetical protein                                                 | conserved hypothetical protein                                       |
| 70 | cbdbA303                      | DET0363                     | DehaBAV1_0345                | VS307                      | hypothetical protein                               | hypothetical protein                               | hypothetical protein                                                 | conserved hypothetical protein                                       |
| 71 | cbdbA328                      | DET0381                     | DehaBAV1_0363                | VS325                      | iron-sulfur cluster-binding protein, Rieske domain | iron-sulfur cluster-binding protein, Rieske family | Rieske (2Fe-2S) domain protein                                       | Rieske (2Fe-2S) domain protein                                       |
| 72 | cbdbB11                       | DET0383                     | DehaBAV1_0364                | VS327                      | hypothetical protein                               | hypothetical protein                               | hypothetical protein                                                 | conserved hypothetical protein                                       |
| 73 | cbdbA331                      | DET0386                     | DehaBAV1_0366                | VS329                      | tetrapyrrole methylase family protein              | tetrapyrrole methylase family protein              | Uroporphyrin-III C/tetrapyrrole (Corrin/Porphyrin) methyltransferase | Uroporphyrin-III C/tetrapyrrole (Corrin/Porphyrin) methyltransferase |
| 74 | cbdbA332                      | DET0387                     | DehaBAV1_0367                | VS330                      | hypothetical protein                               | hypothetical protein                               | hypothetical protein                                                 | conserved hypothetical protein                                       |
| 75 | cbdbA346                      | DET0396                     | DehaBAV1_0375                | VS339                      | conserved hypothetical protein                     | conserved hypothetical protein TIGR00150           | protein of unknown function UPF0079                                  | protein of unknown function UPF0079                                  |
| 76 | cbdbA353                      | DET0402                     | DehaBAV1_0381                | VS345                      | SAM-dependent methyltransferase UbiE/COQ5 family   | methyltransferase, UbiE/COQ5 family                | Methyltransferase type 11                                            | Methyltransferase type 11                                            |

| No | CBDB1 core hypothetical genes | 195 core hypothetical genes | BAV1 core hypothetical genes | VS core hypothetical genes | CBDB1 annotation                                    | 195 annotation                                    | BAV1 annotation                                   | VS annotation                                     |
|----|-------------------------------|-----------------------------|------------------------------|----------------------------|-----------------------------------------------------|---------------------------------------------------|---------------------------------------------------|---------------------------------------------------|
| 77 | cbdbA354                      | DET0403                     | DehaBAV1_0382                | VS346                      | serine/threonine protein phosphatase family protein | Ser/Thr protein phosphatase family protein        | metallophosphoesterase                            | metallophosphoesterase                            |
| 78 | cbdbA355                      | DET0404                     | DehaBAV1_0383                | VS347                      | dimethyladenosine transferase                       | dimethyladenosine transferase                     | dimethyladenosine transferase( EC:2.1.1.48 )      | dimethyladenosine transferase( EC:2.1.1.48 )      |
| 79 | cbdbA358                      | DET0406                     | DehaBAV1_0385                | VS349                      | rubrerythrin                                        | rubrerythrin/rubredoxin                           | Rubrerythrin                                      | Rubrerythrin                                      |
| 80 | cbdbA362                      | DET0410                     | DehaBAV1_0389                | VS353                      | ABC transporter, ATP-binding protein                | nodulation ATP-binding protein I                  | ABC transporter related                           | ABC transporter related                           |
| 81 | cbdbA363                      | DET0411                     | DehaBAV1_0390                | VS354                      | ABC transporter, permease protein                   | putative NodJ                                     | ABC-2 type transporter                            | ABC-2 type transporter                            |
| 82 | cbdbA364                      | DET0412                     | DehaBAV1_0391                | VS355                      | conserved hypothetical protein                      | hypothetical protein                              | Dephospho-CoA kinase-like protein                 | conserved hypothetical protein                    |
| 83 | cbdbA372                      | DET0421                     | DehaBAV1_0399                | VS363                      | degV family protein                                 | degV family protein                               | degV family protein                               | degV family protein                               |
| 84 | cbdbA376                      | DET0425                     | DehaBAV1_0401                | VS366                      | conserved hypothetical membrane protein             | hypothetical protein                              | hypothetical protein                              | conserved hypothetical integral membrane protein  |
| 85 | cbdbA377                      | DET0426                     | DehaBAV1_0402                | VS367                      | conserved hypothetical protein                      | metallo-beta-lactamase family protein             | hypothetical protein                              | metallo-beta-lactamase family protein             |
| 86 | cbdbA380                      | DET0427                     | DehaBAV1_0404                | VS369                      | carbohydrate kinase, yjeF-family                    | carbohydrate kinase family protein                | carbohydrate kinase, YjeF related protein         | carbohydrate kinase, YjeF related protein         |
| 87 | cbdbA387                      | DET0433                     | DehaBAV1_0410                | VS375                      | hypothetical protein                                | hypothetical protein                              | hypothetical protein                              | conserved hypothetical protein                    |
| 88 | cbdbA394                      | DET0440                     | DehaBAV1_0417                | VS382                      | hypothetical protein                                | hypothetical protein                              | hypothetical protein                              | conserved hypothetical protein                    |
| 89 | cbdbA410                      | DET0452                     | DehaBAV1_0429                | VS394                      | hypothetical protein                                | hypothetical protein                              | hypothetical protein                              | conserved hypothetical protein                    |
| 90 | cbdbA415                      | DET0455                     | DehaBAV1_0432                | VS397                      | HIT domain protein                                  | HIT domain protein                                | histidine triad (HIT) protein                     | histidine triad (HIT) protein                     |
| 91 | cbdbA420                      | DET0459                     | DehaBAV1_0436                | VS402                      | hypothetical membrane protein                       | hypothetical protein                              | hypothetical protein                              | conserved hypothetical protein                    |
| 92 | cbdbA460                      | DET0496                     | DehaBAV1_0473                | VS438                      | methionine aminopeptidase, type I                   | methionine aminopeptidase, type I( EC:3.4.11.18 ) | methionine aminopeptidase, type I( EC:3.4.11.18 ) | methionine aminopeptidase, type I( EC:3.4.11.18 ) |

| No  | CBDB1 core hypothetical genes | 195 core hypothetical genes | BAV1 core hypothetical genes | VS core hypothetical genes | CBDB1 annotation                                  | 195 annotation                                     | BAV1 annotation                                       | VS annotation                                      |
|-----|-------------------------------|-----------------------------|------------------------------|----------------------------|---------------------------------------------------|----------------------------------------------------|-------------------------------------------------------|----------------------------------------------------|
| 93  | cbdbA471                      | DET0507                     | DehaBAV1_0484                | VS449                      | hypothetical protein                              | hypothetical protein                               | hypothetical protein                                  | conserved hypothetical protein                     |
| 94  | cbdbA475                      | DET0511                     | DehaBAV1_0487                | VS452                      | conserved domain protein                          | hypothetical protein                               | hypothetical protein                                  | conserved hypothetical protein                     |
| 95  | cbdbA478                      | DET0514                     | DehaBAV1_0490                | VS455                      | conserved hypothetical protein                    | hypothetical protein                               | Uncharacterized protein-like protein                  | conserved hypothetical protein                     |
| 96  | cbdbA479                      | DET0515                     | DehaBAV1_0491                | VS456                      | conserved hypothetical protein                    | hypothetical protein                               | hypothetical protein                                  | conserved hypothetical protein                     |
| 97  | cbdbA481                      | DET0516                     | DehaBAV1_0492                | VS457                      | conserved hypothetical protein                    | hypothetical protein                               | hypothetical protein                                  | conserved hypothetical protein                     |
| 98  | cbdbA485                      | DET0519                     | DehaBAV1_0495                | VS460                      | ABC transporter, permease protein                 | ABC transporter, permease protein, putative        | ABC-2 type transporter                                | ABC-2 type transporter                             |
| 99  | cbdbA488                      | DET0521                     | DehaBAV1_0497                | VS462                      | conserved hypothetical protein                    | hypothetical protein                               | hypothetical protein                                  | conserved hypothetical protein                     |
| 100 | cbdbA489                      | DET0522                     | DehaBAV1_0498                | VS463                      | conserved hypothetical protein                    | hypothetical protein                               | MaoC domain protein dehydratase                       | MaoC domain protein dehydratase                    |
| 101 | cbdbA493                      | DET0525                     | DehaBAV1_0501                | VS466                      | conserved hypothetical protein                    | hypothetical protein                               | protein of unknown function DUF75                     | protein of unknown function DUF75                  |
| 102 | cbdbA504                      | DET0532                     | DehaBAV1_0508                | VS473                      | putative phosphatidylethanolamine binding protein | phosphatidylethanolamine-binding protein, putative | PEBP family protein                                   | PEBP family protein                                |
| 103 | cbdbA505                      | DET0533                     | DehaBAV1_0509                | VS474                      | HAD-superfamily hydrolase, subfamily IA           | HAD-superfamily hydrolase, subfamily IA            | HAD-superfamily hydrolase, subfamily IA, variant 1    | HAD-superfamily hydrolase, subfamily IA, variant 1 |
| 104 | cbdbA510                      | DET0536                     | DehaBAV1_0512                | VS477                      | conserved hypothetical protein                    | hypothetical protein                               | PSP1 domain protein                                   | PSP1 domain protein                                |
| 105 | cbdbA517                      | DET0543                     | DehaBAV1_0519                | VS484                      | fatty acid/phospholipid synthesis protein PlsX    | fatty acid/phospholipid synthesis protein          | fatty acid/phospholipid synthesis protein PlsX        | fatty acid/phospholipid synthesis protein PlsX     |
| 106 | cbdbA519                      | DET0544                     | DehaBAV1_0520                | VS485                      | activator of 2-hydroxyglutaryl-CoA dehydratase    | BadF/BadG/BcrA/BcrD ATPase family protein          | putative CoA-substrate-specific enzyme activase       | putative CoA-substrate-specific enzyme activase    |
| 107 | cbdbA531                      | DET0557                     | DehaBAV1_0531                | VS496                      | hypothetical protein                              | hypothetical protein                               | hypothetical protein                                  | hypothetical protein                               |
| 108 | cbdbA541                      | DET0567                     | DehaBAV1_0541                | VS506                      | conserved hypothetical protein                    | hypothetical protein                               | RNA-binding protein (contains KH domain)-like protein | conserved hypothetical protein                     |

| No  | CBDB1 core hypothetical genes | 195 core hypothetical genes | BAV1 core hypothetical genes | VS core hypothetical genes | CBDB1 annotation                              | 195 annotation                             | BAV1 annotation                                       | VS annotation                                  |
|-----|-------------------------------|-----------------------------|------------------------------|----------------------------|-----------------------------------------------|--------------------------------------------|-------------------------------------------------------|------------------------------------------------|
| 109 | cbdbA545                      | DET0571                     | DehaBAV1_0545                | VS510                      | hypothetical protein                          | hypothetical protein                       | hypothetical protein                                  | conserved hypothetical protein                 |
| 110 | cbdbA549                      | DET0575                     | DehaBAV1_0548                | VS514                      | hypothetical protein                          | hypothetical protein                       | hypothetical protein                                  | conserved hypothetical protein                 |
| 111 | cbdbA559                      | DET0581                     | DehaBAV1_0555                | VS520                      | conserved hypothetical protein                | hypothetical protein                       | DNA alkylation repair enzyme-like protein             | conserved hypothetical protein                 |
| 112 | cbdbA562                      | DET0584                     | DehaBAV1_0558                | VS523                      | conserved hypothetical protein                | hypothetical protein                       | conserved hypothetical protein 103                    | conserved hypothetical protein 103             |
| 113 | cbdbA565                      | DET0587                     | DehaBAV1_0561                | VS526                      | conserved hypothetical protein                | hypothetical protein                       | hypothetical protein                                  | conserved hypothetical protein                 |
| 114 | cbdbA567                      | DET0588                     | DehaBAV1_0563                | VS528                      | conserved hypothetical protein                | hypothetical protein                       | Uncharacterized protein-like protein                  | conserved hypothetical protein                 |
| 115 | cbdbA568                      | DET0589                     | DehaBAV1_0564                | VS529                      | GTPase domain protein                         | GTPase domain, tubulin/FtsZ family protein | Tubulin/FtsZ, GTPase                                  | GTPase domain, tubulin/FtsZ family protein     |
| 116 | cbdbA570                      | DET0591                     | DehaBAV1_0566                | VS532                      | conserved hypothetical protein                | hypothetical protein                       | 2-hydroxyglutaryl-CoA dehydratase, D-component        | 2-hydroxyglutaryl-CoA dehydratase, D-component |
| 117 | cbdbA574                      | DET0594                     | DehaBAV1_0569                | VS534                      | conserved hypothetical protein                | conserved hypothetical protein TIGR00725   | Rossmann fold nucleotide-binding protein-like protein | conserved hypothetical protein                 |
| 118 | cbdbA578                      | DET0597                     | DehaBAV1_0572                | VS537                      | conserved hypothetical protein                | hypothetical protein                       | uncharacterised conserved protein UCP033563           | Uncharacterised conserved protein UCP033563    |
| 119 | cbdbA579                      | DET0598                     | DehaBAV1_0573                | VS538                      | SNO glutamine amidotransferase family protein | SNO glutamine amidotransferase family      | SNO glutamine amidotransferase                        | SNO glutamine amidotransferase                 |
| 120 | cbdbA589                      | DET0607                     | DehaBAV1_0581                | VS546                      | conserved hypothetical protein                | hypothetical protein                       | protein of unknown function DUF208                    | protein of unknown function DUF208             |
| 121 | cbdbA592                      | DET0609                     | DehaBAV1_0583                | VS548                      | hypothetical protein                          | hypothetical protein                       | hypothetical protein                                  | conserved hypothetical protein                 |
| 122 | cbdbA593                      | DET0610                     | DehaBAV1_0584                | VS549                      | conserved hypothetical membrane protein       | hypothetical protein                       | hypothetical protein                                  | conserved hypothetical protein                 |
| 123 | cbdbA594                      | DET0611                     | DehaBAV1_0585                | VS550                      | conserved hypothetical protein                | hypothetical protein                       | Methyltransferase type 11                             | Methyltransferase type 11                      |
| 124 | cbdbA599                      | DET0617                     | DehaBAV1_0590                | VS555                      | hypothetical protein                          | hypothetical protein                       | hypothetical protein                                  | conserved hypothetical protein                 |

| No  | CBDB1 core hypothetical genes | 195 core hypothetical genes | BAV1 core hypothetical genes | VS core hypothetical genes | CBDB1 annotation                                               | 195 annotation                           | BAV1 annotation                                                         | VS annotation                                                           |
|-----|-------------------------------|-----------------------------|------------------------------|----------------------------|----------------------------------------------------------------|------------------------------------------|-------------------------------------------------------------------------|-------------------------------------------------------------------------|
| 125 | cbdbA600                      | DET0618                     | DehaBAV1_0591                | VS556                      | putative thiol-disulfide oxidoreductase                        | thiol-disulfide oxidoreductase, putative | alkyl hydroperoxide reductase/ Thiol specific antioxidant/ Mal allergen | alkyl hydroperoxide reductase/ Thiol specific antioxidant/ Mal allergen |
| 126 | cbdbA602                      | DET0620                     | DehaBAV1_0593                | VS558                      | conserved domain protein                                       | hypothetical protein                     | RecB family exonuclease-like protein                                    | conserved hypothetical protein                                          |
| 127 | cbdbA604                      | DET0621                     | DehaBAV1_0594                | VS562                      | conserved hypothetical membrane protein                        | hypothetical protein                     | hypothetical protein                                                    | conserved hypothetical protein                                          |
| 128 | cbdbA604                      | DET0621                     | DehaBAV1_0594                | VS562                      | conserved hypothetical membrane protein                        | hypothetical protein                     | hypothetical protein                                                    | conserved hypothetical protein                                          |
| 129 | cbdbA606                      | DET0622                     | DehaBAV1_0595                | VS563                      | radical SAM domain protein                                     | radical SAM domain protein               | Radical SAM domain protein                                              | Radical SAM domain protein                                              |
| 130 | cbdbA613                      | DET0626                     | DehaBAV1_0599                | VS567                      | conserved domain protein                                       | hypothetical protein                     | protein of unknown function UPF0153                                     | protein of unknown function UPF0153                                     |
| 131 | cbdbA614                      | DET0627                     | DehaBAV1_0600                | VS568                      | hypothetical protein                                           | hypothetical protein                     | hypothetical protein                                                    | conserved hypothetical protein                                          |
| 132 | cbdbA621                      | DET0635                     | DehaBAV1_0607                | VS575                      | hypothetical protein                                           | hypothetical protein                     | hypothetical protein                                                    | conserved hypothetical protein                                          |
| 133 | cbdbA624                      | DET0639                     | DehaBAV1_0611                | VS579                      | hypothetical protein                                           | hypothetical protein                     | hypothetical protein                                                    | conserved hypothetical protein                                          |
| 134 | cbdbA630                      | DET0645                     | DehaBAV1_0617                | VS585                      | nitroreductase family protein                                  | nitroreductase family protein            | nitroreductase                                                          | nitroreductase                                                          |
| 135 | cbdbA631                      | DET0646                     | DehaBAV1_0618                | VS586                      | conserved hypothetical protein, nucleotide (SAM) binding motif | hypothetical protein                     | Methyltransferase type 12                                               | Methyltransferase type 12                                               |
| 136 | cbdbA632                      | DET0648                     | DehaBAV1_0619                | VS587                      | conserved domain protein                                       | hypothetical protein                     | hypothetical protein                                                    | conserved hypothetical protein                                          |
| 137 | cbdbA637                      | DET0653                     | DehaBAV1_0623                | VS591                      | conserved hypothetical protein                                 | hypothetical protein                     | protein of unknown function DUF105                                      | protein of unknown function DUF105                                      |
| 138 | cbdbA645                      | DET0661                     | DehaBAV1_0630                | VS599                      | thioredoxin                                                    | thioredoxin                              | thioredoxin                                                             | thioredoxin                                                             |
| 139 | cbdbA649                      | DET0664                     | DehaBAV1_0633                | VS602                      | hypothetical protein                                           | hypothetical protein                     | hypothetical protein                                                    | conserved hypothetical protein                                          |
| 140 | cbdbA659                      | DET0670                     | DehaBAV1_0639                | VS608                      | iron-sulfur cluster binding protein                            | iron-sulfur cluster binding protein      | ferredoxin                                                              | ferredoxin                                                              |
| 141 | cbdbA661                      | DET0672                     | DehaBAV1_0641                | VS610                      | hypothetical protein                                           | hypothetical protein                     | hypothetical protein                                                    | conserved hypothetical protein                                          |
| 142 | cbdbA688                      | DET0734                     | DehaBAV1_0665                | VS640                      | conserved domain protein                                       | hypothetical protein                     | putative regulatory protein, FmdB family                                | putative regulatory protein, FmdB family                                |

| No  | CBDB1 core hypothetical genes | 195 core hypothetical genes | BAV1 core hypothetical genes | VS core hypothetical genes | CBDB1 annotation                 | 195 annotation                              | BAV1 annotation                     | VS annotation                           |
|-----|-------------------------------|-----------------------------|------------------------------|----------------------------|----------------------------------|---------------------------------------------|-------------------------------------|-----------------------------------------|
| 143 | cbdbA691                      | DET0737                     | DehaBAV1_0667                | VS643                      | putative GTP-binding protein     | GTP-binding protein, putative               | GTP-binding protein, HSR1-related   | GTP-binding protein, HSR1-related       |
| 144 | cbdbA692                      | DET0738                     | DehaBAV1_0668                | VS644                      | hypothetical protein             | hypothetical protein                        | hypothetical protein                | conserved hypothetical protein          |
| 145 | cbdbA727                      | DET0754                     | DehaBAV1_0682                | VS660                      | hypothetical protein             | hypothetical protein                        | hypothetical protein                | conserved hypothetical protein          |
| 146 | cbdbA728                      | DET0755                     | DehaBAV1_0683                | VS661                      | hypothetical protein             | hypothetical protein                        | hypothetical protein                | conserved hypothetical protein          |
| 147 | cbdbA729                      | DET0757                     | DehaBAV1_0684                | VS663                      | conserved hypothetical protein   | hypothetical protein                        | hypothetical protein                | conserved hypothetical protein          |
| 148 | cbdbA734                      | DET0762                     | DehaBAV1_0688                | VS668                      | hypothetical membrane protein    | hypothetical protein                        | hypothetical protein                | conserved hypothetical membrane protein |
| 149 | cbdbA735                      | DET0763                     | DehaBAV1_0689                | VS669                      | hypothetical membrane protein    | hypothetical protein                        | hypothetical protein                | conserved hypothetical membrane protein |
| 150 | cbdbA736                      | DET0764                     | DehaBAV1_0690                | VS670                      | conserved hypothetical protein   | hypothetical protein                        | dienelactone hydrolase              | dienelactone hydrolase                  |
| 151 | cbdbA737                      | DET0765                     | DehaBAV1_0691                | VS671                      | hypothetical protein             | hypothetical protein                        | hypothetical protein                | conserved hypothetical protein          |
| 152 | cbdbA739                      | DET0767                     | DehaBAV1_0693                | VS673                      | ATPase, C subunit family protein | ATPase, C subunit family protein            | hypothetical protein                | ATPase, C subunit family protein        |
| 153 | cbdbA740                      | DET0768                     | DehaBAV1_0694                | VS674                      | conserved membrane protein       | hypothetical protein                        | protein of unknown function UPF0132 | hypothetical protein                    |
| 154 | cbdbA744                      | DET0771                     | DehaBAV1_0697                | VS677                      | conserved hypothetical protein   | hypothetical protein                        | FAD dependent oxidoreductase        | FAD dependent oxidoreductase            |
| 155 | cbdbA745                      | DET0772                     | DehaBAV1_0698                | VS678                      | hypothetical protein             | hypothetical protein                        | hypothetical protein                | conserved hypothetical protein          |
| 156 | cbdbA747                      | DET0773                     | DehaBAV1_0699                | VS679                      | conserved membrane protein       | CAAX amino terminal protease family protein | Abortive infection protein          | Abortive infection protein              |
| 157 | cbdbA750                      | DET0776                     | DehaBAV1_0702                | VS682                      | methyltransferase GidB           | methyltransferase GidB                      | methyltransferase GidB              | methyltransferase GidB                  |
| 158 | cbdbA757                      | DET0781                     | DehaBAV1_0707                | VS687                      | conserved hypothetical protein   | conserved hypothetical protein TIGR00252    | protein of unknown function UPF0102 | protein of unknown function UPF0102     |
| 159 | cbdbA763                      | DET0786                     | DehaBAV1_0712                | VS692                      | hypothetical membrane protein    | hypothetical protein                        | hypothetical protein                | conserved hypothetical protein          |

| No  | CBDB1 core hypothetical genes | 195 core hypothetical genes | BAV1 core hypothetical genes | VS core hypothetical genes | CBDB1 annotation                      | 195 annotation                              | BAV1 annotation                                          | VS annotation                                |
|-----|-------------------------------|-----------------------------|------------------------------|----------------------------|---------------------------------------|---------------------------------------------|----------------------------------------------------------|----------------------------------------------|
| 160 | cbdbA768                      | DET0790                     | DehaBAV1_0716                | VS696                      | putative phosphoribosyltransferase    | phosphoribosyl transferase domain protein   | phosphoribosyltransferase                                | phosphoribosyltransferase                    |
| 161 | cbdbA778                      | DET0800                     | DehaBAV1_0724                | VS704                      | hypothetical protein                  | hypothetical protein                        | hypothetical protein                                     | hypothetical protein                         |
| 162 | cbdbA779                      | DET0801                     | DehaBAV1_0725                | VS705                      | conserved hypothetical protein        | pyrroline-5-carboxylate reductase, putative | NADP oxidoreductase, coenzyme F420-dependent             | NADP oxidoreductase, coenzyme F420-dependent |
| 163 | cbdbA783                      | DET0805                     | DehaBAV1_0729                | VS709                      | major facilitator family transporter  | major facilitator family transporter        | major facilitator superfamily MFS_1                      | major facilitator superfamily MFS_1          |
| 164 | cbdbA785                      | DET0811                     | DehaBAV1_0731                | VS715                      | phytoene dehydrogenase family protein | phytoene dehydrogenase family               | Phytoene dehydrogenase and related protein-like protein  | FAD dependent oxidoreductase                 |
| 165 | cbdbA789                      | DET0813                     | DehaBAV1_0733                | VS717                      | ABC transporter, ATP-binding protein  | ABC transporter, ATP-binding protein        | ABC transporter related                                  | ABC transporter related                      |
| 166 | cbdbA797                      | DET0820                     | DehaBAV1_0739                | VS724                      | hypothetical protein                  | hypothetical protein                        | hypothetical protein                                     | conserved hypothetical protein               |
| 167 | cbdbA799                      | DET0821                     | DehaBAV1_0740                | VS725                      | conserved domain protein              | hypothetical protein                        | hypothetical protein                                     | conserved hypothetical protein               |
| 168 | cbdbA800                      | DET0822                     | DehaBAV1_0741                | VS726                      | conserved hypothetical protein        | hypothetical protein                        | protein of unknown function DUF101                       | protein of unknown function DUF101           |
| 169 | cbdbA801                      | DET0823                     | DehaBAV1_0742                | VS727                      | conserved hypothetical protein        | hypothetical protein                        | protein of unknown function UPF0027                      | protein of unknown function UPF0027          |
| 170 | cbdbA807                      | DET0829                     | DehaBAV1_0748                | VS733                      | membrane protein, MgtC                | membrane protein, MgtC / SapB family        | MgtC/SapB transporter                                    | MgtC/SapB transporter                        |
| 171 | cbdbA818                      | DET0837                     | DehaBAV1_0756                | VS741                      | hypothetical protein                  | hypothetical protein                        | hypothetical protein                                     | conserved hypothetical protein               |
| 172 | cbdbA830                      | DET0847                     | DehaBAV1_0766                | VS751                      | conserved domain protein              | hypothetical protein                        | Membrane-bound serine protease (ClpP class)-like protein | conserved hypothetical protein               |
| 173 | cbdbA831                      | DET0848                     | DehaBAV1_0767                | VS752                      | SPFH domain protein                   | SPFH domain/band 7 family domain protein    | band 7 protein                                           | band 7 protein                               |
| 174 | cbdbA833                      | DET0850                     | DehaBAV1_0769                | VS754                      | conserved hypothetical protein        | hypothetical protein                        | hypothetical protein                                     | conserved hypothetical protein               |
| 175 | cbdbA834                      | DET0851                     | DehaBAV1_0770                | VS755                      | ABC transporter, ATP-binding protein  | sodium extrusion protein NatA, putative     | ABC transporter related                                  | ABC transporter related                      |

| No  | CBDB1 core hypothetical genes | 195 core hypothetical genes | BAV1 core hypothetical genes | VS core hypothetical genes | CBDB1 annotation                        | 195 annotation                          | BAV1 annotation                                                      | VS annotation                                         |
|-----|-------------------------------|-----------------------------|------------------------------|----------------------------|-----------------------------------------|-----------------------------------------|----------------------------------------------------------------------|-------------------------------------------------------|
| 176 | cbdbA835                      | DET0852                     | DehaBAV1_0771                | VS756                      | ABC transporter, permease protein       | sodium extrusion protein NatB, putative | ABC-type Na <sup>+</sup> efflux pump permease component-like protein | ABC transporter, permease protein                     |
| 177 | cbdbA837                      | DET0854                     | DehaBAV1_0772                | VS758                      | conserved hypothetical protein          | hypothetical protein                    | hypothetical protein                                                 | conserved hypothetical protein                        |
| 178 | cbdbA856                      | DET0872                     | DehaBAV1_0790                | VS775                      | membrane protein, MmpL domain           | membrane protein, MmpL family           | MMPL domain protein                                                  | MMPL domain protein                                   |
| 179 | cbdbA858                      | DET0907                     | DehaBAV1_0792                | VS779                      | conserved hypothetical protein          | hypothetical protein                    | transcriptional regulator, TrmB                                      | transcriptional regulator, TrmB                       |
| 180 | cbdbA860                      | DET0909                     | DehaBAV1_0794                | VS781                      | conserved hypothetical membrane protein | hypothetical protein                    | major facilitator superfamily MFS_1                                  | major facilitator superfamily MFS_1                   |
| 181 | cbdbA861                      | DET0911                     | DehaBAV1_0795                | VS782                      | aminopeptidase protein                  | aminopeptidase protein( EC:3.4.11.- )   | peptidase M29, aminopeptidase II                                     | peptidase M29, aminopeptidase II                      |
| 182 | cbdbA863                      | DET0913                     | DehaBAV1_0797                | VS784                      | conserved hypothetical protein          | hypothetical protein                    | Rubrerythrin                                                         | Rubrerythrin                                          |
| 183 | cbdbA864                      | DET0914                     | DehaBAV1_0798                | VS785                      | hypothetical protein                    | hypothetical protein                    | hypothetical protein                                                 | conserved hypothetical protein                        |
| 184 | cbdbA865                      | DET0915                     | DehaBAV1_0799                | VS786                      | hypothetical protein                    | hypothetical protein                    | hypothetical protein                                                 | conserved hypothetical protein                        |
| 185 | cbdbA867                      | DET0916                     | DehaBAV1_0800                | VS787                      | conserved hypothetical protein          | hypothetical protein                    | protein of unknown function DUF75                                    | protein of unknown function DUF75                     |
| 186 | cbdbA868                      | DET0917                     | DehaBAV1_0801                | VS788                      | hypothetical protein                    | hypothetical protein                    | hypothetical protein                                                 | conserved hypothetical protein                        |
| 187 | cbdbA869                      | DET0918                     | DehaBAV1_0802                | VS789                      | hypothetical protein                    | hypothetical protein                    | hypothetical protein                                                 | conserved hypothetical protein                        |
| 188 | cbdbA870                      | DET0919                     | DehaBAV1_0803                | VS790                      | conserved hypothetical protein          | hypothetical protein                    | protein of unknown function DUF375                                   | protein of unknown function DUF375                    |
| 189 | cbdbA871                      | DET0920                     | DehaBAV1_0804                | VS791                      | iron-sulfur cluster-binding protein     | iron-sulfur cluster-binding protein     | 4Fe-4S ferredoxin, iron-sulfur binding domain protein                | 4Fe-4S ferredoxin, iron-sulfur binding domain protein |
| 190 | cbdbA872                      | DET0921                     | DehaBAV1_0805                | VS792                      | conserved hypothetical protein          | hypothetical protein                    | protein of unknown function DUF39                                    | protein of unknown function DUF39                     |
| 191 | cbdbA891                      | DET0937                     | DehaBAV1_0821                | VS808                      | thioesterase family protein             | thioesterase family protein             | thioesterase superfamily protein                                     | thioesterase superfamily protein                      |
| 192 | cbdbA893                      | DET0939                     | DehaBAV1_0823                | VS810                      | hypothetical protein                    | hypothetical protein                    | hypothetical protein                                                 | conserved hypothetical protein                        |



| No  | CBDB1 core hypothetical genes | 195 core hypothetical genes | BAV1 core hypothetical genes | VS core hypothetical genes | CBDB1 annotation                        | 195 annotation                         | BAV1 annotation                     | VS annotation                              |
|-----|-------------------------------|-----------------------------|------------------------------|----------------------------|-----------------------------------------|----------------------------------------|-------------------------------------|--------------------------------------------|
| 193 | cbdbA904                      | DET0949                     | DehaBAV1_0833                | VS820                      | CBS domain protein                      | CBS domain protein                     | CBS domain containing protein       | CBS domain containing protein              |
| 194 | cbdbA905                      | DET0950                     | DehaBAV1_0834                | VS821                      | conserved domain protein                | hypothetical protein                   | hypothetical protein                | conserved hypothetical protein             |
| 195 | cbdbA906                      | DET0951                     | DehaBAV1_0835                | VS822                      | nifU domain protein                     | nifU domain protein                    | nitrogen-fixing NifU domain protein | nitrogen-fixing NifU domain protein        |
| 196 | cbdbA907                      | DET0952                     | DehaBAV1_0836                | VS823                      | conserved hypothetical protein          | hypothetical protein                   | hypothetical protein                | conserved hypothetical protein             |
| 197 | cbdbA909                      | DET0954                     | DehaBAV1_0838                | VS825                      | Hsp20                                   | Hsp20/alpha crystallin family protein  | heat shock protein Hsp20            | heat shock protein Hsp20                   |
| 198 | cbdbA914                      | DET1511                     | DehaBAV1_0841                | VS829                      | hypothetical protein                    | hypothetical protein                   | hypothetical protein                | conserved hypothetical protein             |
| 199 | cbdbA915                      | DET0959                     | DehaBAV1_0850                | VS832                      | Smr domain protein                      | Smr domain protein                     | Smr protein/MutS2                   | Smr protein/MutS2                          |
| 200 | cbdbA918                      | DET0961                     | DehaBAV1_0852                | VS834                      | conserved hypothetical protein          | hypothetical protein                   | Protein of unknown function DUF128  | Protein of unknown function DUF128         |
| 201 | cbdbA924                      | DET0965                     | DehaBAV1_0856                | VS838                      | conserved hypothetical membrane protein | hypothetical protein                   | protein of unknown function DUF205  | protein of unknown function DUF205         |
| 202 | cbdbA929                      | DET0968                     | DehaBAV1_0859                | VS841                      | conserved hypothetical protein          | hypothetical protein                   | protein of unknown function DUF503  | protein of unknown function DUF503         |
| 203 | cbdbA936                      | DET0974                     | DehaBAV1_0865                | VS847                      | puromycin N-acetyltransferase, homolog  | puromycin N-acetyltransferase, homolog | hypothetical protein                | puromycin N-acetyltransferase-like protein |
| 204 | cbdbA937                      | DET0975                     | DehaBAV1_0866                | VS848                      | acetyltransferase, GNAT family          | acetyltransferase, GNAT family         | GCN5-related N-acetyltransferase    | GCN5-related N-acetyltransferase           |
| 205 | cbdbA948                      | DET0984                     | DehaBAV1_0875                | VS856                      | conserved hypothetical protein          | hypothetical protein                   | protein of unknown function DUF448  | protein of unknown function DUF448         |
| 206 | cbdbA949                      | DET0985                     | DehaBAV1_0876                | VS857                      | N utilization substance protein A       | transcription elongation factor NusA   | NusA antitermination factor         | NusA antitermination factor                |
| 207 | cbdbA950                      | DET0986                     | DehaBAV1_0877                | VS858                      | Mg chelatase, homolog                   | Mg chelatase-like protein              | Mg chelatase, subunit ChII          | Mg chelatase, subunit ChII                 |
| 208 | cbdbA951                      | DET0987                     | DehaBAV1_0878                | VS859                      | acetyltransferase, GNAT family          | acetyltransferase, GNAT family         | GCN5-related N-acetyltransferase    | acetyltransferase, GNAT family             |
| 209 | cbdbA952                      | DET0988                     | DehaBAV1_0879                | VS860                      | acetyltransferase, GNAT family          | acetyltransferase, GNAT family         | GCN5-related N-acetyltransferase    | GCN5-related N-acetyltransferase           |
| 210 | cbdbA953                      | DET0989                     | DehaBAV1_0880                | VS861                      | conserved hypothetical protein          | hypothetical protein                   | protein of unknown function DUF502  | protein of unknown function DUF502         |

| No  | CBDB1 core hypothetical genes | 195 core hypothetical genes | BAV1 core hypothetical genes | VS core hypothetical genes | CBDB1 annotation                        | 195 annotation                                       | BAV1 annotation                                         | VS annotation                                           |
|-----|-------------------------------|-----------------------------|------------------------------|----------------------------|-----------------------------------------|------------------------------------------------------|---------------------------------------------------------|---------------------------------------------------------|
| 211 | cbdbA962                      | DET1001                     | DehaBAV1_0889                | VS873                      | conserved hypothetical protein          | hypothetical protein                                 | LmbE family protein                                     | LmbE family protein                                     |
| 212 | cbdbA964                      | DET1003                     | DehaBAV1_0891                | VS875                      | conserved hypothetical protein          | hypothetical protein                                 | hypothetical protein                                    | conserved hypothetical protein                          |
| 213 | cbdbA969                      | DET1007                     | DehaBAV1_0894                | VS878                      | redox-active disulfide protein 2        | redox-active disulfide protein 2                     | redox-active disulfide protein 2                        | redox-active disulfide protein 2                        |
| 214 | cbdbA971                      | DET1008                     | DehaBAV1_0895                | VS879                      | conserved domain protein                | hypothetical protein                                 | hypothetical protein                                    | conserved hypothetical protein                          |
| 215 | cbdbA981                      | DET1010                     | DehaBAV1_0898                | VS882                      | hypothetical membrane protein           | hypothetical protein                                 | hypothetical protein                                    | conserved hypothetical membrane protein                 |
| 216 | cbdbA982                      | DET1011                     | DehaBAV1_0899                | VS883                      | hypothetical protein                    | hypothetical protein                                 | hypothetical protein                                    | conserved hypothetical protein                          |
| 217 | cbdbA983                      | DET1013                     | DehaBAV1_0900                | VS884                      | hypothetical protein                    | hypothetical protein                                 | hypothetical protein                                    | conserved hypothetical protein                          |
| 218 | cbdbA985                      | DET1014                     | DehaBAV1_0901                | VS885                      | ACT domain protein                      | ACT domain protein                                   | ACT domain-containing protein-like protein              | ACT domain protein                                      |
| 219 | cbdbA990                      | DET1018                     | DehaBAV1_0904                | VS888                      | conserved hypothetical protein          | hypothetical protein                                 | hypothetical protein                                    | conserved hypothetical protein                          |
| 220 | cbdbA992                      | DET1021                     | DehaBAV1_0905                | VS894                      | hypothetical protein                    | hypothetical protein                                 | hypothetical protein                                    | conserved hypothetical protein                          |
| 221 | cbdbA995                      | DET1026                     | DehaBAV1_0909                | VS898                      | hypothetical protein                    | hypothetical protein                                 | hypothetical protein                                    | conserved hypothetical protein                          |
| 222 | cbdbA998                      | DET1027                     | DehaBAV1_0910                | VS899                      | putative acylphosphatase                | acylphosphatase, putative                            | acylphosphatase                                         | acylphosphatase                                         |
| 223 | cbdbA999                      | DET1028                     | DehaBAV1_0911                | VS900                      | conserved hypothetical protein          | hypothetical protein                                 | hypothetical protein                                    | conserved hypothetical protein                          |
| 224 | cbdbA1001                     | DET1030                     | DehaBAV1_0913                | VS901                      | cytosol aminopeptidase                  | cytosol aminopeptidase family protein( EC:3.4.11.1 ) | Leucyl aminopeptidase( EC:3.4.11.1 )                    | Leucyl aminopeptidase( EC:3.4.11.1 )                    |
| 225 | cbdbA1002                     | DET1031                     | DehaBAV1_0914                | VS902                      | hypothetical protein                    | hypothetical protein                                 | kinase-like protein                                     | conserved hypothetical protein                          |
| 226 | cbdbA1004                     | DET1032                     | DehaBAV1_0915                | VS903                      | degV family protein                     | degV family protein                                  | degV family protein                                     | degV family protein                                     |
| 227 | cbdbA1014                     | DET1039                     | DehaBAV1_0921                | VS909                      | putative SpoIIIJ-associated protein Jag | SpoIIIJ-associated protein Jag, putative             | single-stranded nucleic acid binding R3H domain protein | single-stranded nucleic acid binding R3H domain protein |

| No  | CBDB1 core hypothetical genes | 195 core hypothetical genes | BAV1 core hypothetical genes | VS core hypothetical genes | CBDB1 annotation                        | 195 annotation                                                 | BAV1 annotation                                       | VS annotation                                         |
|-----|-------------------------------|-----------------------------|------------------------------|----------------------------|-----------------------------------------|----------------------------------------------------------------|-------------------------------------------------------|-------------------------------------------------------|
| 228 | cbdbA1016                     | DET1041                     | DehaBAV1_0923                | VS911                      | hypothetical protein                    | PQQ enzyme repeat domain protein                               | Pyrrolo-quinoline quinone                             | Pyrrolo-quinoline quinone                             |
| 229 | cbdbA1021                     | DET1051                     | DehaBAV1_0930                | VS919                      | conserved domain protein                | hypothetical protein                                           | hypothetical protein                                  | conserved hypothetical protein                        |
| 230 | cbdbA1024                     | DET1053                     | DehaBAV1_0932                | VS921                      | conserved domain protein                | hypothetical protein                                           | hypothetical protein                                  | conserved hypothetical protein                        |
| 231 | cbdbA1028                     | DET1056                     | DehaBAV1_0935                | VS924                      | hypothetical transport protein          | hypothetical protein                                           | protein of unknown function DUF6, transmembrane       | protein of unknown function DUF6, transmembrane       |
| 232 | cbdbA1030                     | DET1057                     | DehaBAV1_0936                | VS925                      | conserved hypothetical protein          | hypothetical protein                                           | hypothetical protein                                  | conserved hypothetical protein                        |
| 233 | cbdbA1040                     | DET1061                     | DehaBAV1_0944                | VS933                      | metallo-beta-lactamase family protein   | metallo-beta-lactamase family protein                          | beta-lactamase domain protein                         | beta-lactamase domain protein                         |
| 234 | cbdbA1046                     | DET1120                     | DehaBAV1_0949                | VS938                      | maf-like protein                        | septum formation protein MaF                                   | maf protein                                           | maf protein                                           |
| 235 | cbdbA1048                     | DET1121                     | DehaBAV1_0950                | VS939                      | conserved hypothetical protein          | hypothetical protein                                           | hypothetical protein                                  | conserved hypothetical protein                        |
| 236 | cbdbA1062                     | DET1134                     | DehaBAV1_0963                | VS952                      | conserved hypothetical membrane protein | hypothetical protein                                           | protein of unknown function DUF204                    | hypothetical protein                                  |
| 237 | cbdbA1064                     | DET1136                     | DehaBAV1_0965                | VS954                      | hypothetical protein                    | hypothetical protein                                           | hypothetical protein                                  | conserved hypothetical protein                        |
| 238 | cbdbA1066                     | DET1137                     | DehaBAV1_0966                | VS955                      | radical SAM domain protein              | radical SAM domain protein                                     | Radical SAM domain protein                            | Radical SAM domain protein                            |
| 239 | cbdbA1071                     | DET1141                     | DehaBAV1_0970                | VS959                      | glycosyl transferase                    | glycosyl transferase/polysaccharide deacetylase family protein | polysaccharide deacetylase                            | polysaccharide deacetylase                            |
| 240 | cbdbA1072                     | DET1142                     | DehaBAV1_0971                | VS960                      | hypothetical protein                    | hypothetical protein                                           | hypothetical protein                                  | conserved hypothetical protein                        |
| 241 | cbdbA1073                     | DET1143                     | DehaBAV1_0972                | VS961                      | conserved hypothetical membrane protein | hypothetical protein                                           | membrane protein-like protein                         | conserved hypothetical protein                        |
| 242 | cbdbA1088                     | DET1164                     | DehaBAV1_0986                | VS965                      | iron-sulfur cluster-binding protein     | iron-sulfur cluster-binding protein                            | 4Fe-4S ferredoxin, iron-sulfur binding domain protein | 4Fe-4S ferredoxin, iron-sulfur binding domain protein |
| 243 | cbdbA1095                     | DET1169                     | DehaBAV1_0990                | VS1358                     | conserved hypothetical protein          | hypothetical protein                                           | putative regulatory protein, FmdB family              | putative regulatory protein, FmdB family              |
| 244 | cbdbB24                       | DET1168                     | DehaBAV1_0991                | VS1357                     | conserved hypothetical protein          | hypothetical protein                                           | hypothetical protein                                  | conserved hypothetical protein                        |

| No  | CBDB1 core hypothetical genes | 195 core hypothetical genes | BAV1 core hypothetical genes | VS core hypothetical genes | CBDB1 annotation                            | 195 annotation                                                      | BAV1 annotation                                                                     | VS annotation                                    |
|-----|-------------------------------|-----------------------------|------------------------------|----------------------------|---------------------------------------------|---------------------------------------------------------------------|-------------------------------------------------------------------------------------|--------------------------------------------------|
| 245 | cbdbA1099                     | DET1185                     | DehaBAV1_0996                | VS968                      | hypothetical protein                        | hypothetical protein                                                | hypothetical protein                                                                | conserved hypothetical protein                   |
| 246 | cbdbA1100                     | DET1186                     | DehaBAV1_0997                | VS969                      | conserved domain protein                    | hypothetical protein                                                | hypothetical protein                                                                | conserved hypothetical protein                   |
| 247 | cbdbA1106                     | DET1191                     | DehaBAV1_1002                | VS974                      | hypothetical periplasmic protein            | lipoprotein, putative                                               | protein of unknown function DUF541                                                  | protein of unknown function DUF541               |
| 248 | cbdbA1109                     | DET1194                     | DehaBAV1_1005                | VS977                      | conserved hypothetical protein              | hypothetical protein                                                | secreted endonuclease distantly related to Holliday junction resolvase-like protein | conserved hypothetical protein                   |
| 249 | cbdbA1128                     | DET1211                     | DehaBAV1_1021                | VS994                      | SAM-dependent methyltransferase HemK family | modification methylase, HemK family                                 | modification methylase, HemK family                                                 | modification methylase, HemK family              |
| 250 | cbdbA1131                     | DET1213                     | DehaBAV1_1023                | VS996                      | hypothetical membrane protein               | hypothetical protein                                                | protein of unknown function DUF95, transmembrane                                    | protein of unknown function DUF95, transmembrane |
| 251 | cbdbA1132                     | DET1214                     | DehaBAV1_1024                | VS997                      | hypothetical protein                        | hypothetical protein                                                | hypothetical protein                                                                | conserved hypothetical protein                   |
| 252 | cbdbA1135                     | DET1217                     | DehaBAV1_1027                | VS1000                     | acetyltransferase, GNAT family              | acetyltransferase, GNAT family                                      | GCN5-related N-acetyltransferase                                                    | GCN5-related N-acetyltransferase                 |
| 253 | cbdbA1138                     | DET1220                     | DehaBAV1_1030                | VS1003                     | hypothetical protein                        | hypothetical protein                                                | hypothetical protein                                                                | conserved hypothetical protein                   |
| 254 | cbdbA1139                     | DET1222                     | DehaBAV1_1031                | VS1004                     | conserved hypothetical protein              | hypothetical protein                                                | hypothetical protein                                                                | conserved hypothetical protein                   |
| 255 | cbdbA1151                     | DET1235                     | DehaBAV1_1049                | VS1020                     | conserved hypothetical protein              | hypothetical protein                                                | hypothetical protein                                                                | conserved hypothetical protein                   |
| 256 | cbdbA1159                     | DET1240                     | DehaBAV1_1053                | VS1025                     | probable peptidylprolyl isomerase           | peptidyl-prolyl cis-trans isomerase, cyclophilin-type( EC:5.2.1.8 ) | Peptidylprolyl isomerase( EC:5.2.1.8 )                                              | Peptidylprolyl isomerase( EC:5.2.1.8 )           |
| 257 | cbdbA1164                     | DET1244                     | DehaBAV1_1057                | VS1029                     | putative iron-sulfur flavoprotein           | NADPH-dependent FMN reductase                                       | NADPH-dependent FMN reductase                                                       | NADPH-dependent FMN reductase                    |
| 258 | cbdbA1165                     | DET1245                     | DehaBAV1_1058                | VS1030                     | TfoX domain protein                         | TfoX domain protein                                                 | TfoX, N-terminal domain protein                                                     | TfoX, N-terminal domain protein                  |
| 259 | cbdbA1167                     | DET1246                     | DehaBAV1_1059                | VS1031                     | hypothetical protein                        | hypothetical protein                                                | hypothetical protein                                                                | conserved hypothetical protein                   |

| No  | CBDB1 core hypothetical genes | 195 core hypothetical genes | BAV1 core hypothetical genes | VS core hypothetical genes | CBDB1 annotation                        | 195 annotation                         | BAV1 annotation                                                  | VS annotation                                   |
|-----|-------------------------------|-----------------------------|------------------------------|----------------------------|-----------------------------------------|----------------------------------------|------------------------------------------------------------------|-------------------------------------------------|
| 260 | cbdbA1169                     | DET1248                     | DehaBAV1_1061                | VS1033                     | conserved hypothetical membrane protein | hypothetical protein                   | protein of unknown function DUF1648                              | protein of unknown function DUF1648             |
| 261 | cbdbA1171                     | DET1250                     | DehaBAV1_1062                | VS1034                     | hypothetical membrane protein           | hypothetical protein                   | hypothetical protein                                             | conserved hypothetical protein                  |
| 262 | cbdbA1172                     | DET1251                     | DehaBAV1_1063                | VS1035                     | NADPH-dependent FMN reductase           | NADPH-dependent FMN reductase          | NADPH-dependent FMN reductase                                    | NADPH-dependent FMN reductase                   |
| 263 | cbdbA1174                     | DET1252                     | DehaBAV1_1064                | VS1036                     | hypothetical protein                    | hypothetical protein                   | hypothetical protein                                             | conserved hypothetical protein                  |
| 264 | cbdbA1176                     | DET1253                     | DehaBAV1_1065                | VS1037                     | hypothetical protein                    | hypothetical protein                   | hypothetical protein                                             | conserved hypothetical protein                  |
| 265 | cbdbA1182                     | DET1259                     | DehaBAV1_1070                | VS1042                     | hypothetical protein                    | hypothetical protein                   | hypothetical protein                                             | conserved hypothetical protein                  |
| 266 | cbdbA1190                     | DET1264                     | DehaBAV1_1075                | VS1047                     | degV family protein                     | degV family protein                    | degV family protein                                              | degV family protein                             |
| 267 | cbdbA1191                     | DET1265                     | DehaBAV1_1076                | VS1048                     | degV family protein                     | degV family protein                    | degV family protein                                              | degV family protein                             |
| 268 | cbdbA1192                     | DET1266                     | DehaBAV1_1077                | VS1049                     | degV family protein                     | degV family protein                    | degV family protein                                              | degV family protein                             |
| 269 | cbdbA1193                     | DET1267                     | DehaBAV1_1078                | VS1050                     | degV family protein                     | degV family protein                    | degV family protein                                              | degV family protein                             |
| 270 | cbdbA1198                     | DET1271                     | DehaBAV1_1082                | VS1054                     | conserved hypothetical protein          | hypothetical protein                   | putative transcriptional regulator, AsnC family                  | putative transcriptional regulator, AsnC family |
| 271 | cbdbA1201                     | DET1273                     | DehaBAV1_1084                | VS1056                     | hypothetical protein                    | hypothetical protein                   | hypothetical protein                                             | conserved hypothetical protein                  |
| 272 | cbdbA1202                     | DET1274                     | DehaBAV1_1085                | VS1057                     | conserved hypothetical protein          | hypothetical protein                   | metal-binding possibly nucleic acid-binding protein-like protein | conserved hypothetical protein                  |
| 273 | cbdbA1208                     | DET1279                     | DehaBAV1_1090                | VS1062                     | acyl carrier protein                    | acyl carrier protein                   | acyl carrier protein                                             | acyl carrier protein                            |
| 274 | cbdbA1210                     | DET1280                     | DehaBAV1_1091                | VS1063                     | radical SAM domain protein              | radical SAM/B12 binding domain protein | Radical SAM domain protein                                       | Radical SAM domain protein                      |
| 275 | cbdbA1213                     | DET1283                     | DehaBAV1_1094                | VS1066                     | hypothetical protein                    | hypothetical protein                   | hypothetical protein                                             | conserved hypothetical protein                  |
| 276 | cbdbA1215                     | DET1284                     | DehaBAV1_1095                | VS1067                     | hypothetical protein                    | hypothetical protein                   | hypothetical protein                                             | conserved hypothetical protein                  |
| 277 | cbdbA1227                     | DET1290                     | DehaBAV1_1101                | VS1073                     | NUDIX domain protein                    | NUDIX domain protein                   | NUDIX hydrolase                                                  | NUDIX hydrolase                                 |
| 278 | cbdbA1235                     | DET1295                     | DehaBAV1_1107                | VS1079                     | hypothetical protein                    | hypothetical protein                   | dienelactone hydrolase-like protein                              | hypothetical protein                            |

| No  | CBDB1 core hypothetical genes | 195 core hypothetical genes | BAV1 core hypothetical genes | VS core hypothetical genes | CBDB1 annotation                | 195 annotation                                                        | BAV1 annotation                                 | VS annotation                                   |
|-----|-------------------------------|-----------------------------|------------------------------|----------------------------|---------------------------------|-----------------------------------------------------------------------|-------------------------------------------------|-------------------------------------------------|
| 279 | cbdbA1239                     | DET1300                     | DehaBAV1_1111                | VS1083                     | universal stress protein family | universal stress protein family                                       | UspA domain protein                             | UspA domain protein                             |
| 280 | cbdbA1241                     | DET1303                     | DehaBAV1_1113                | VS1085                     | fasciclin domain protein        | fasciclin domain protein                                              | beta-Ig-H3/fasciclin                            | beta-Ig-H3/fasciclin                            |
| 281 | cbdbA1244                     | DET1305                     | DehaBAV1_1114                | VS1086                     | conserved hypothetical protein  | hypothetical protein                                                  | hypothetical protein                            | conserved hypothetical protein                  |
| 282 | cbdbA1245                     | DET1306                     | DehaBAV1_1115                | VS1087                     | hypothetical protein            | hypothetical protein                                                  | hypothetical protein                            | conserved hypothetical protein                  |
| 283 | cbdbA1247                     | DET1307                     | DehaBAV1_1117                | VS1089                     | conserved hypothetical protein  | hypothetical protein                                                  | protein of unknown function DUF1508             | protein of unknown function DUF1508             |
| 284 | cbdbA1248                     | DET1308                     | DehaBAV1_1118                | VS1090                     | putative hydrolase              | hydrolase, alpha/beta fold family                                     | alpha/beta hydrolase fold                       | alpha/beta hydrolase fold                       |
| 285 | cbdbA1249                     | DET1309                     | DehaBAV1_1119                | VS1091                     | ATPase, AAA family              | ATPase, AAA family                                                    | AAA ATPase, central domain protein              | AAA ATPase, central domain protein              |
| 286 | cbdbA1251                     | DET1310                     | DehaBAV1_1120                | VS1092                     | conserved domain protein        | hypothetical protein                                                  | hypothetical protein                            | conserved hypothetical protein                  |
| 287 | cbdbA1252                     | DET1311                     | DehaBAV1_1121                | VS1093                     | hypothetical protein            | hypothetical protein                                                  | hypothetical protein                            | hypothetical protein                            |
| 288 | cbdbA1253                     | DET1313                     | DehaBAV1_1122                | VS1094                     | conserved hypothetical protein  | protein of unknown function /conserved hypothetical protein TIGR00296 | protein of unknown function DUF52               | protein of unknown function DUF52               |
| 289 | cbdbA1254                     | DET1314                     | DehaBAV1_1123                | VS1095                     | radical SAM domain protein      | radical SAM domain protein                                            | Radical SAM domain protein                      | Radical SAM domain protein                      |
| 290 | cbdbA1255                     | DET1315                     | DehaBAV1_1124                | VS1096                     | hypothetical membrane protein   | hypothetical protein                                                  | protein of unknown function DUF6, transmembrane | protein of unknown function DUF6, transmembrane |
| 291 | cbdbB27                       | DET1317                     | DehaBAV1_1125                | VS1098                     | conserved domain protein        | hypothetical protein                                                  | hypothetical protein                            | hypothetical protein                            |
| 292 | cbdbA1256                     | DET1318                     | DehaBAV1_1126                | VS1099                     | conserved hypothetical protein  | hypothetical protein                                                  | protein of unknown function DUF520              | protein of unknown function DUF520              |
| 293 | cbdbA1260                     | DET1320                     | DehaBAV1_1129                | VS1101                     | conserved hypothetical protein  | hypothetical protein                                                  | AAA ATPase                                      | AAA ATPase                                      |
| 294 | cbdbA1264                     | DET1321                     | DehaBAV1_1131                | VS1103                     | acetyltransferase, GNAT family  | acetyltransferase, GNAT family                                        | GCN5-related N-acetyltransferase                | GCN5-related N-acetyltransferase                |
| 295 | cbdbA1266                     | DET1322                     | DehaBAV1_1133                | VS1104                     | hypothetical protein            | hypothetical protein                                                  | hypothetical protein                            | conserved hypothetical protein                  |
| 296 | cbdbA1275                     | DET1328                     | DehaBAV1_1139                | VS1110                     | putative membrane protein       | hypothetical protein                                                  | protein of unknown function DUF1385             | protein of unknown function DUF1385             |

| No  | CBDB1 core hypothetical genes | 195 core hypothetical genes | BAV1 core hypothetical genes | VS core hypothetical genes | CBDB1 annotation               | 195 annotation                           | BAV1 annotation                     | VS annotation                           |
|-----|-------------------------------|-----------------------------|------------------------------|----------------------------|--------------------------------|------------------------------------------|-------------------------------------|-----------------------------------------|
| 297 | cbdbA1277                     | DET1330                     | DehaBAV1_1141                | VS1112                     | acetyltransferase, GNAT family | acetyltransferase, GNAT family           | GCN5-related N-acetyltransferase    | GCN5-related N-acetyltransferase        |
| 298 | cbdbA1279                     | DET1332                     | DehaBAV1_1143                | VS1114                     | conserved hypothetical protein | hypothetical protein                     | hypothetical protein                | conserved hypothetical protein          |
| 299 | cbdbA1281                     | DET1333                     | DehaBAV1_1144                | VS1115                     | conserved hypothetical protein | hypothetical protein                     | protein of unknown function DUF107  | protein of unknown function DUF107      |
| 300 | cbdbA1285                     | DET1336                     | DehaBAV1_1147                | VS1118                     | hypothetical protein           | hypothetical protein                     | hypothetical protein                | conserved hypothetical protein          |
| 301 | cbdbA1287                     | DET1337                     | DehaBAV1_1148                | VS1119                     | hypothetical membrane protein  | hypothetical protein                     | hypothetical protein                | conserved hypothetical protein          |
| 302 | cbdbA1297                     | DET1347                     | DehaBAV1_1158                | VS1129                     | hypothetical protein           | hypothetical protein                     | hypothetical protein                | conserved hypothetical protein          |
| 303 | cbdbA1306                     | DET1355                     | DehaBAV1_1167                | VS1137                     | hypothetical protein           | hypothetical protein                     | hypothetical protein                | conserved hypothetical protein          |
| 304 | cbdbA1307                     | DET1356                     | DehaBAV1_1168                | VS1138                     | hypothetical protein           | hypothetical protein                     | hypothetical protein                | conserved hypothetical protein          |
| 305 | cbdbA1308                     | DET1357                     | DehaBAV1_1169                | VS1139                     | hypothetical protein           | hypothetical protein                     | hypothetical protein                | conserved hypothetical protein          |
| 306 | cbdbA1315                     | DET1364                     | DehaBAV1_1175                | VS1145                     | conserved hypothetical protein | hypothetical protein                     | RDD domain containing protein       | RDD domain containing protein           |
| 307 | cbdbA1318                     | DET1367                     | DehaBAV1_1178                | VS1148                     | hypothetical protein           | hypothetical protein                     | hypothetical protein                | conserved hypothetical protein          |
| 308 | cbdbA1319                     | DET1368                     | DehaBAV1_1179                | VS1149                     | radical SAM domain protein     | radical SAM domain protein               | Radical SAM domain protein          | Radical SAM domain protein              |
| 309 | cbdbA1320                     | DET1369                     | DehaBAV1_1180                | VS1150                     | hypothetical protein           | hypothetical protein                     | hypothetical protein                | hypothetical protein                    |
| 310 | cbdbA1322                     | DET1370                     | DehaBAV1_1181                | VS1151                     | conserved hypothetical protein | conserved hypothetical protein TIGR00043 | protein of unknown function UPF0054 | protein of unknown function UPF0054     |
| 311 | cbdbA1323                     | DET1371                     | DehaBAV1_1182                | VS1152                     | NADPH-dependent FMN reductase  | NADPH-dependent FMN reductase            | NADPH-dependent FMN reductase       | NADPH-dependent FMN reductase           |
| 312 | cbdbA1330                     | DET1376                     | DehaBAV1_1187                | VS1157                     | conserved hypothetical protein | hypothetical protein                     | hypothetical protein                | conserved hypothetical protein          |
| 313 | cbdbA1331                     | DET1377                     | DehaBAV1_1188                | VS1158                     | hypothetical protein           | hypothetical protein                     | hypothetical protein                | conserved hypothetical protein          |
| 314 | cbdbA1332                     | DET1378                     | DehaBAV1_1189                | VS1159                     | hypothetical membrane protein  | hypothetical protein                     | hypothetical protein                | conserved hypothetical membrane protein |

| No  | CBDB1 core hypothetical genes | 195 core hypothetical genes | BAV1 core hypothetical genes | VS core hypothetical genes | CBDB1 annotation                                 | 195 annotation                                 | BAV1 annotation                                                | VS annotation                                |
|-----|-------------------------------|-----------------------------|------------------------------|----------------------------|--------------------------------------------------|------------------------------------------------|----------------------------------------------------------------|----------------------------------------------|
| 315 | cbdbA1333                     | DET1379                     | DehaBAV1_1190                | VS1160                     | auxin-responsive GH3 protein homolog             | auxin-responsive GH3 protein homolog, putative | GH3 auxin-responsive promoter                                  | auxin-responsive GH3 protein-like protein    |
| 316 | cbdbA1335                     | DET1381                     | DehaBAV1_1191                | VS1162                     | GGDEF domain                                     | GGDEF domain/HD domain protein                 | diguanylate cyclase and metal dependent phosphohydrolase       | metal dependent phosphohydrolase             |
| 317 | cbdbA1349                     | DET1392                     | DehaBAV1_1201                | VS1173                     | rhodanese-like domain protein                    | rhodanese-like domain protein                  | Rhodanese domain protein                                       | Rhodanese domain protein                     |
| 318 | cbdbA1350                     | DET1393                     | DehaBAV1_1202                | VS1174                     | hypothetical protein                             | hypothetical protein                           | hypothetical protein                                           | conserved hypothetical protein               |
| 319 | cbdbA1354                     | DET1395                     | DehaBAV1_1204                | VS1177                     | GTP-binding protein EngA                         | GTP-binding protein                            | small GTP-binding protein                                      | small GTP-binding protein                    |
| 320 | cbdbA1355                     | DET1396                     | DehaBAV1_1205                | VS1178                     | conserved hypothetical membrane protein          | conserved hypothetical protein TIGR00023       | protein of unknown function DUF205                             | protein of unknown function DUF205           |
| 321 | cbdbA1363                     | DET1402                     | DehaBAV1_1211                | VS1184                     | conserved hypothetical protein                   | hypothetical protein                           | Zn-dependent hydrolase of the beta-lactamase fold-like protein | conserved hypothetical protein               |
| 322 | cbdbA1365                     | DET1403                     | DehaBAV1_1212                | VS1185                     | conserved domain protein                         | hypothetical protein                           | hypothetical protein                                           | peptidase C14, caspase catalytic subunit p20 |
| 323 | cbdbA1366                     | DET1404                     | DehaBAV1_1213                | VS1186                     | conserved hypothetical protein                   | conserved hypothetical protein, truncation     | exonuclease-like protein                                       | conserved hypothetical protein               |
| 324 | cbdbA1368                     | DET1407                     | DehaBAV1_1214                | VS1188                     | conserved domain protein                         | BNR/Asp-box repeat domain protein              | hypothetical protein                                           | Fibronectin, type III domain protein         |
| 325 | cbdbA1375                     | DET1414                     | DehaBAV1_1221                | VS1195                     | hypothetical membrane protein                    | hypothetical protein                           | hypothetical protein                                           | conserved hypothetical protein               |
| 326 | cbdbA1383                     | DET1419                     | DehaBAV1_1227                | VS1201                     | conserved hypothetical protein                   | transcriptional regulator, AbrB family         | transcriptional regulator, AbrB family                         | transcriptional regulator, AbrB family       |
| 327 | cbdbA1384                     | DET1420                     | DehaBAV1_1228                | VS1202                     | SAM-dependent methyltransferase UbiE/COQ5 family | methyltransferase, UbiE/COQ5 family            | Methyltransferase type 11                                      | Methyltransferase type 11                    |
| 328 | cbdbA1385                     | DET1421                     | DehaBAV1_1229                | VS1203                     | PP-loop family protein                           | PP-loop family protein                         | tRNA(Ile)-lysidine synthetase                                  | tRNA(Ile)-lysidine synthetase                |



| No  | CBDB1 core hypothetical genes | 195 core hypothetical genes | BAV1 core hypothetical genes | VS core hypothetical genes | CBDB1 annotation                    | 195 annotation                      | BAV1 annotation                                       | VS annotation                                         |
|-----|-------------------------------|-----------------------------|------------------------------|----------------------------|-------------------------------------|-------------------------------------|-------------------------------------------------------|-------------------------------------------------------|
| 329 | cbdbA1387                     | DET1423                     | DehaBAV1_1231                | VS1205                     | peptidase, M48 family               | peptidase, M48 family               | Ste24 endopeptidase( EC:3.4.24.84 )                   | Ste24 endopeptidase( EC:3.4.24.84 )                   |
| 330 | cbdbA1388                     | DET1424                     | DehaBAV1_1232                | VS1206                     | conserved hypothetical protein      | hypothetical protein                | Uncharacterized protein-like protein                  | conserved hypothetical protein                        |
| 331 | cbdbA1389                     | DET1425                     | DehaBAV1_1233                | VS1207                     | probable hemolysin-related protein  | hypothetical protein                | protein of unknown function DUF21                     | protein of unknown function DUF21                     |
| 332 | cbdbA1394                     | DET1429                     | DehaBAV1_1237                | VS1211                     | peptidase, M16 family               | peptidase, M16 family               | peptidase M16 domain protein                          | peptidase M16 domain protein                          |
| 333 | cbdbA1405                     | DET1438                     | DehaBAV1_1245                | VS1219                     | hypothetical protein                | hypothetical protein                | hypothetical protein                                  | conserved hypothetical protein                        |
| 334 | cbdbA1414                     | DET1449                     | DehaBAV1_1251                | VS1228                     | membrane transporter, MarC family   | membrane protein, MarC family       | multiple antibiotic resistance (MarC)-related protein | multiple antibiotic resistance (MarC)-related protein |
| 335 | cbdbA1416                     | DET1450                     | DehaBAV1_1252                | VS1229                     | conserved hypothetical protein      | hypothetical protein                | cyclase/dehydrase                                     | cyclase/dehydrase                                     |
| 336 | cbdbA1417                     | DET1451                     | DehaBAV1_1253                | VS1230                     | hypothetical protein                | hypothetical protein                | hypothetical protein                                  | conserved hypothetical protein                        |
| 337 | cbdbA1418                     | DET1452                     | DehaBAV1_1254                | VS1231                     | conserved hypothetical protein      | hypothetical protein                | hypothetical protein                                  | conserved hypothetical protein                        |
| 338 | cbdbA1420                     | DET1455                     | DehaBAV1_1256                | VS1233                     | conserved hypothetical protein      | hypothetical protein                | amidohydrolase 2                                      | amidohydrolase 2                                      |
| 339 | cbdbA1422                     | DET1457                     | DehaBAV1_1258                | VS1235                     | hypothetical protein                | hypothetical protein                | hypothetical protein                                  | conserved hypothetical protein                        |
| 340 | cbdbA1424                     | DET1458                     | DehaBAV1_1259                | VS1236                     | putative comF family protein        | comF family protein, putative       | amidophosphoribosyltransferase-like protein           | ComF family protein, putative                         |
| 341 | cbdbA1430                     | DET1461                     | DehaBAV1_1262                | VS1239                     | hypothetical periplasmic protein    | lipoprotein, putative               | secreted protein-like protein                         | lipoprotein, putative                                 |
| 342 | cbdbA1433                     | DET1463                     | DehaBAV1_1264                | VS1241                     | hypothetical protein                | hypothetical protein                | hypothetical protein                                  | conserved hypothetical protein                        |
| 343 | cbdbA1437                     | DET1465                     | DehaBAV1_1266                | VS1243                     | integral membrane protein TIGR01906 | integral membrane protein TIGR01906 | integral membrane protein TIGR01906                   | integral membrane protein TIGR01906                   |
| 344 | cbdbA1438                     | DET1466                     | DehaBAV1_1267                | VS1244                     | hypothetical protein                | hypothetical protein                | hypothetical protein                                  | conserved hypothetical protein                        |
| 345 | cbdbA1440                     | DET1468                     | DehaBAV1_1269                | VS1245                     | conserved hypothetical protein      | hypothetical protein                | putative regulatory protein, FmdB family              | putative regulatory protein, FmdB family              |
| 346 | cbdbA1465                     | DET1495                     | DehaBAV1_1285                | VS1271                     | conserved hypothetical protein      | hypothetical protein                | Methyltransferase type 12                             | Methyltransferase type 12                             |

| No  | CBDB1 core hypothetical genes | 195 core hypothetical genes | BAV1 core hypothetical genes | VS core hypothetical genes | CBDB1 annotation                     | 195 annotation                             | BAV1 annotation                             | VS annotation                               |
|-----|-------------------------------|-----------------------------|------------------------------|----------------------------|--------------------------------------|--------------------------------------------|---------------------------------------------|---------------------------------------------|
| 347 | cbdbA1470                     | DET1499                     | DehaBAV1_1289                | VS1274                     | conserved hypothetical protein       | hypothetical protein                       | Helix-turn-helix, type 11 domain protein    | Helix-turn-helix, type 11 domain protein    |
| 348 | cbdbA1471                     | DET1500                     | DehaBAV1_1290                | VS1275                     | conserved hypothetical protein       | hypothetical protein                       | hypothetical protein                        | conserved hypothetical protein              |
| 349 | cbdbA1474                     | DET1502                     | DehaBAV1_1292                | VS1276                     | major facilitator family transporter | major facilitator family protein           | major facilitator superfamily MFS_1         | major facilitator superfamily MFS_1         |
| 350 | cbdbA1477                     | DET1504                     | DehaBAV1_1294                | VS1278                     | iron(II) transport protein A         | ferrous iron transport protein A, putative | FeoA family protein                         | FeoA family protein                         |
| 351 | cbdbA1479                     | DET1506                     | DehaBAV1_1296                | VS1280                     | SsrA-binding protein                 | SsrA-binding protein                       | SsrA-binding protein                        | SsrA-binding protein                        |
| 352 | cbdbA1646                     | DET1564                     | DehaBAV1_1309                | VS1443                     | hypothetical protein                 | hypothetical protein                       | hypothetical protein                        | conserved hypothetical protein              |
| 353 | cbdbA1649                     | DET1568                     | DehaBAV1_1313                | VS1446                     | hypothetical membrane protein        | hypothetical protein                       | hypothetical protein                        | conserved hypothetical membrane protein     |
| 354 | cbdbA1650                     | DET1569                     | DehaBAV1_1314                | VS1447                     | hypothetical protein                 | hypothetical protein                       | hypothetical protein                        | conserved hypothetical protein              |
| 355 | cbdbA1670                     | DET1582                     | DehaBAV1_1331                | VS1461                     | conserved domain protein             | hypothetical protein                       | hypothetical protein                        | conserved hypothetical protein              |
| 356 | cbdbA1671                     | DET1584                     | DehaBAV1_1332                | VS1468                     | hypothetical protein                 | hypothetical protein                       | hypothetical protein                        | conserved hypothetical protein              |
| 357 | cbdbA1673                     | DET1585                     | DehaBAV1_1333                | VS1469                     | conserved hypothetical protein       | hypothetical protein                       | hypothetical protein                        | conserved hypothetical protein              |
| 358 | cbdbA1675                     | DET1586                     | DehaBAV1_1334                | VS1470                     | lemA family protein                  | lemA family protein                        | LemA family protein                         | LemA family protein                         |
| 359 | cbdbA1677                     | DET1587                     | DehaBAV1_1335                | VS1471                     | putative peptidase                   | peptidase, M28 family                      | peptidase M48, Ste24p                       | peptidase M48, Ste24p                       |
| 360 | cbdbA1684                     | DET1592                     | DehaBAV1_1340                | VS1476                     | AIR synthase domain protein          | AIR synthase domain protein                | AIR synthase related protein domain protein | AIR synthase related protein domain protein |
| 361 | cbdbA1686                     | DET1595                     | DehaBAV1_1342                | VS1478                     | ApbE                                 | ApbE/NosX family protein                   | ApbE family lipoprotein                     | ApbE family lipoprotein                     |
| 362 | cbdbA1702                     | DET1608                     | DehaBAV1_1354                | VS1490                     | KH domain protein                    | KH domain/HDIG domain protein              | metal dependent phosphohydrolase            | metal dependent phosphohydrolase            |
| 363 | cbdbA1703                     | DET1609                     | DehaBAV1_1355                | VS1491                     | conserved hypothetical protein       | Ser/Thr protein phosphatase family protein | metallophosphoesterase                      | metallophosphoesterase                      |

| No  | CBDB1 core hypothetical genes | 195 core hypothetical genes | BAV1 core hypothetical genes | VS core hypothetical genes | CBDB1 annotation                            | 195 annotation                              | BAV1 annotation                                            | VS annotation                                       |
|-----|-------------------------------|-----------------------------|------------------------------|----------------------------|---------------------------------------------|---------------------------------------------|------------------------------------------------------------|-----------------------------------------------------|
| 364 | cbdbA1704                     | DET1610                     | DehaBAV1_1356                | VS1492                     | PHP domain N-terminal region family protein | PHP domain N-terminal region family protein | PHP C-terminal domain protein                              | PHP C-terminal domain protein                       |
| 365 | cbdbA1705                     | DET1611                     | DehaBAV1_1357                | VS1493                     | conserved hypothetical membrane protein     | hypothetical protein                        | protein of unknown function DUF205                         | protein of unknown function DUF205                  |
| 366 | cbdbA1707                     | DET1613                     | DehaBAV1_1359                | VS1495                     | conserved hypothetical protein TIGR00104    | conserved hypothetical protein TIGR00104    | protein of unknown function UPF0066                        | protein of unknown function UPF0066                 |
| 367 | cbdbA1709                     | DET1615                     | DehaBAV1_1361                | VS1497                     | HIT domain protein                          | HIT domain protein                          | histidine triad (HIT) protein                              | histidine triad (HIT) protein                       |
| 368 | cbdbA1711                     | DET1617                     | DehaBAV1_1363                | VS1499                     | conserved hypothetical protein              | hypothetical protein                        | protein of unknown function DUF74                          | protein of unknown function DUF74                   |
| 369 | cbdbA1717                     | DET1621                     | DehaBAV1_1367                | VS1503                     | hypothetical protein                        | hypothetical protein                        | cell wall/surface repeat protein                           | cell wall/surface repeat protein                    |
| 370 | cbdbA1718                     | DET1622                     | DehaBAV1_1368                | VS1504                     | conserved hypothetical protein              | hypothetical protein                        | DNA-binding protein with PD1-like DNA-binding-like protein | conserved hypothetical protein                      |
| 371 | cbdbA1720                     | DET1623                     | DehaBAV1_1369                | VS1505                     | putative desulfiredoxin                     | desulfiredoxin, putative                    | Desulfoferredoxin Dfx domain protein                       | Desulfoferredoxin Dfx domain protein                |
| 372 | cbdbA1721                     | DET1624                     | DehaBAV1_1370                | VS1506                     | hypothetical protein                        | hypothetical protein                        | hypothetical protein                                       | conserved hypothetical protein                      |
| 373 | cbdbA1727                     | DET1629                     | DehaBAV1_1374                | VS1511                     | radical SAM domain protein                  | radical SAM domain protein                  | Radical SAM domain protein                                 | Radical SAM domain protein                          |
| 374 | cbdbA1729                     | DET1631                     | DehaBAV1_1376                | VS1513                     | TPR domain protein                          | TPR domain protein                          | TPR repeat-containing protein                              | TPR repeat-containing protein                       |
| 375 | cbdbA1730                     | DET1632                     | DehaBAV1_1377                | VS1514                     | nifU protein, homolog                       | NifU-like protein                           | nitrogen-fixing NifU domain protein                        | HesB/YadR/YfhF-family protein                       |
| 376 | cbdbA1733                     | DET1634                     | DehaBAV1_1379                | VS1516                     | hypothetical protein                        | hypothetical protein                        | hypothetical protein                                       | conserved hypothetical protein                      |
| 377 | cbdbA1735                     | DET1637                     | DehaBAV1_1381                | VS1519                     | mazG family protein                         | mazG family protein                         | MazG family protein                                        | MazG family protein                                 |
| 378 | cbdbA1737                     | DET1638                     | DehaBAV1_1382                | VS1520                     | conserved hypothetical protein              | hypothetical protein                        | peptidase, membrane zinc metallopeptidase, putative        | peptidase, membrane zinc metallopeptidase, putative |
| 379 | cbdbA1015                     | DET1040                     | DehaBAV1_0922                | VS910                      | putative inner membrane protein, 60 kDa     | inner membrane protein, 60 kDa              | putative inner membrane protein, 60 kDa                    | 60 kDa inner membrane insertion protein             |
| 380 | cbdbA1640                     | DET1548                     | DehaBAV1_1304                | VS1438                     | conserved hypothetical protein              | hypothetical protein                        | conserved hypothetical protein                             | protein of unknown function DUF62                   |

| No  | CBDB1 core hypothetical genes | 195 core hypothetical genes | BAV1 core hypothetical genes | VS core hypothetical genes | CBDB1 annotation                                                   | 195 annotation                                                      | BAV1 annotation                                                                  | VS annotation                                          |
|-----|-------------------------------|-----------------------------|------------------------------|----------------------------|--------------------------------------------------------------------|---------------------------------------------------------------------|----------------------------------------------------------------------------------|--------------------------------------------------------|
| 381 | cbdbA195                      | DET0187                     | DehaBAV1_0165                | VS176                      | formate dehydrogenase, major subunit                               | formate dehydrogenase, alpha subunit( EC:1.2.1.2 )                  | formate dehydrogenase, alpha subunit( EC:1.2.1.2 )                               | formate dehydrogenase, alpha subunit( EC:1.2.1.2 )     |
| 382 | cbdbA193                      | DET0186                     | DehaBAV1_0166                | VS175                      | formate dehydrogenase, membrane subunit                            | formate dehydrogenase, membrane subunit, putative                   | Polysulphide reductase, NrfD                                                     | Polysulphide reductase, NrfD                           |
| 383 | cbdbA191                      | DET0185                     | DehaBAV1_0167                | VS174                      | formate dehydrogenase accessory protein                            | formate dehydrogenase accessory protein FdhE, putative              | Uncharacterized protein involved in formate dehydrogenase formation-like protein | formate dehydrogenase accessory protein FdhE, putative |
| 384 | cbdbA121                      | DET0103                     | DehaBAV1_0265                | VS113                      | putative molybdopterin oxidoreductase, iron-sulfur binding subunit | molybdopterin oxidoreductase, iron-sulfur binding subunit, putative | 4Fe-4S ferredoxin, iron-sulfur binding domain protein                            | 4Fe-4S ferredoxin, iron-sulfur binding domain protein  |
| 385 | cbdbA120                      | DET0102                     | DehaBAV1_0266                | VS112                      | putative molybdopterin oxidoreductase, membrane subunit            | molybdopterin oxidoreductase, membrane subunit, putative            | Polysulphide reductase, NrfD                                                     | Polysulphide reductase, NrfD                           |
| 386 | cbdbA118                      | DET0101                     | DehaBAV1_0267                | VS111                      | molybdopterin oxidoreductase                                       | molybdopterin oxidoreductase                                        | molybdopterin oxidoreductase Fe4S4 region                                        | molybdopterin oxidoreductase                           |
| 387 | cbdbA115                      | DET0099                     | DehaBAV1_0269                | VS109                      | putative molybdopterin-guanine dinucleotide biosynthesis protein A | mobA family protein                                                 | 4-diphosphocytidyl-2C-methyl-D-erythritol synthase                               | MobA family protein                                    |
| 388 | cbdbA134                      | DET0115                     | DehaBAV1_0254                | VS124                      | ABC transporter, permease protein                                  | ABC transporter, permease protein, putative                         | ABC-2 type transporter                                                           | ABC-2 type transporter                                 |
| 389 | cbdbA133                      | DET0114                     | DehaBAV1_0255                | VS123                      | ABC transporter, permease protein                                  | ABC transporter, substrate-binding protein, putative                | ABC-2 type transporter                                                           | ABC-2 type transporter                                 |
| 390 | cbdbA271                      | DET0331                     | DehaBAV1_0311                | VS273                      | cation efflux family protein                                       | cation efflux family protein                                        | cation diffusion facilitator family transporter                                  | cation diffusion facilitator family transporter        |

| No  | CBDB1 core hypothetical genes | 195 core hypothetical genes | BAV1 core hypothetical genes | VS core hypothetical genes | CBDB1 annotation                                                                                       | 195 annotation                              | BAV1 annotation                      | VS annotation                                                                                          |
|-----|-------------------------------|-----------------------------|------------------------------|----------------------------|--------------------------------------------------------------------------------------------------------|---------------------------------------------|--------------------------------------|--------------------------------------------------------------------------------------------------------|
| 391 | cbdbA273                      | DET0332                     | DehaBAV1_0312                | VS274                      | protein-export membrane protein SecF                                                                   | protein-export membrane protein SecF        | protein-export membrane protein SecF | protein-export membrane protein SecF                                                                   |
| 392 | cbdbA274                      | DET0333                     | DehaBAV1_0313                | VS275                      | protein-export membrane protein SecD                                                                   | protein-export membrane protein SecD        | protein-export membrane protein SecD | protein-export membrane protein SecD                                                                   |
| 393 | cbdbA360                      | DET0408                     | DehaBAV1_0387                | VS351                      | cation channel family protein                                                                          | cation channel family protein               | Ion transport protein                | Ion transport protein                                                                                  |
| 394 | cbdbA1715                     | DET1619                     | DehaBAV1_1365                | VS1501                     | ABC transporter, ATP-binding protein                                                                   | ABC transporter, ATP-binding protein        | ABC transporter related              | ABC transporter related                                                                                |
| 395 | cbdbA1716                     | DET1620                     | DehaBAV1_1366                | VS1502                     | putative ABC-transporter, permease component                                                           | hypothetical protein                        | hypothetical protein                 | membrane protein, putative                                                                             |
| 396 | cbdbA1289                     | DET1339                     | DehaBAV1_1150                | VS1121                     | ABC transporter, ATP-binding protein                                                                   | ABC transporter, ATP-binding protein        | ABC transporter related              | ABC transporter related                                                                                |
| 397 | cbdbA1290                     | DET1340                     | DehaBAV1_1151                | VS1122                     | ABC transporter, permease protein                                                                      | ABC transporter, permease protein, putative | ABC-2 type transporter               | ABC transporter, permease protein                                                                      |
| 398 | cbdbA772                      | DET0793                     | DehaBAV1_0719                | VS699                      | ABC transporter associated protein with signal peptide, putative periplasmic substrate binding subunit | hypothetical protein                        | hypothetical protein                 | ABC transporter associated protein with signal peptide, putative periplasmic substrate binding subunit |
| 399 | cbdbA773                      | DET0794                     | DehaBAV1_0720                | VS700                      | ABC transporter, ATP-binding protein                                                                   | ABC transporter, ATP-binding protein        | ABC transporter related              | ABC transporter related                                                                                |
| 400 | cbdbA774                      | DET0795                     | DehaBAV1_0721                | VS701                      | ABC transporter, permease protein                                                                      | ABC transporter, permease protein           | ABC-2 type transporter               | ABC-2 type transporter                                                                                 |
| 401 | cbdbA791                      | DET0814                     | DehaBAV1_0734                | VS718                      | ABC transporter, permease protein                                                                      | ABC transporter, permease protein           | ABC-2 type transporter               | ABC-2 type transporter                                                                                 |
| 402 | cbdbA793                      | DET0815                     | DehaBAV1_0735                | VS719                      | iron-regulated ABC transporter, atp-binding protein, SufC                                              | FeS assembly ATPase SufC, putative          | ABC transporter related              | ABC transporter related                                                                                |
| 403 | cbdbA794                      | DET0816                     | DehaBAV1_0736                | VS720                      | iron-regulated ABC transporter, subunit SufB-related                                                   | sufB/sufD domain protein                    | SufBD protein                        | SufBD protein                                                                                          |

**Table 17. List of Exchange Reactions of *i*AI549**

| No | Abbreviation  | Equation           |
|----|---------------|--------------------|
| 1  | EX_ac(e)      | [e] : ac <==>      |
| 2  | EX_antim(e)   | [e] : antim <==>   |
| 3  | EX_arsna(e)   | [e] : arsna <==>   |
| 4  | EX_arsni2(e)  | [e] : arsni2 <==>  |
| 5  | EX_cbl1(e)    | [e] : cbl1 <==>    |
| 6  | EX_cit(e)     | [e] : cit <==>     |
| 7  | EX_cl(e)      | [e] : cl <==>      |
| 8  | EX_co2(e)     | [e] : co2 <==>     |
| 9  | EX_cobalt2(e) | [e] : cobalt2 <==> |
| 10 | EX_cu2(e)     | [e] : cu2 <==>     |
| 11 | EX_dcb(e)     | [e] : dcb <==>     |
| 12 | EX_etl(e)     | [e] : etl <==>     |
| 13 | EX_fe2(e)     | [e] : fe2 <==>     |
| 14 | EX_gln-L(e)   | [e] : gln-L <==>   |
| 15 | EX_glyb(e)    | [e] : glyb <==>    |
| 16 | EX_h(e)       | [e] : h <==>       |
| 17 | EX_h2(e)      | [e] : h2 <==>      |
| 18 | EX_h2o(e)     | [e] : h2o <==>     |
| 19 | EX_hcb(e)     | [e] : hcb <==>     |
| 20 | EX_ile-L(e)   | [e] : ile-L <==>   |
| 21 | EX_k(e)       | [e] : k <==>       |
| 22 | EX_leu-L(e)   | [e] : leu-L <==>   |
| 23 | EX_mg2(e)     | [e] : mg2 <==>     |
| 24 | EX_mn2(e)     | [e] : mn2 <==>     |
| 25 | EX_mobd(e)    | [e] : mobd <==>    |
| 26 | EX_n2(e)      | [e] : n2 <==>      |
| 27 | EX_nh4(e)     | [e] : nh4 <==>     |
| 28 | EX_ni2(e)     | [e] : ni2 <==>     |
| 29 | EX_pce(e)     | [e] : pce <==>     |
| 30 | EX_pi(e)      | [e] : pi <==>      |
| 31 | EX_pro-L(e)   | [e] : pro-L <==>   |
| 32 | EX_so4(e)     | [e] : so4 <==>     |
| 33 | EX_tsul(e)    | [e] : tsul <==>    |

| No | Abbreviation | Equation         |
|----|--------------|------------------|
| 34 | EX_val-L(e)  | [e] : val-L <==> |
| 35 | EX_zn2(e)    | [e] : zn2 <==>   |

**Table 18. Set of Constraints for Simulating *Dehalococcoides* Growth using *i*AI549**

| Abbreviation | Equation                                                                                           | LB        | UB       | Flux (mmol/gDCW/h) | EC Number |
|--------------|----------------------------------------------------------------------------------------------------|-----------|----------|--------------------|-----------|
| AACPAT       | [c] : ACP + accoa --> acACP + coa                                                                  | 0         | Infinity | 0.00               | 2.3.1.38  |
| ABTA         | [c] : 4abut + akglu --> glu-L + succal                                                             | 0         | Infinity | 0.00               | 2.6.1.19  |
| ACBIPGT      | [c] : adcobap + gtp + h --> adgcoba + ppi                                                          | 0         | Infinity | 0.00               |           |
| ACCOAC       | [c] : accoa + atp + hco3 --> adp + h + malcoa + pi                                                 | 0         | Infinity | 0.02               | 6.4.1.2   |
| ACGK         | [c] : acglu + atp --> acg5p + adp                                                                  | 0         | Infinity | 0.01               | 2.7.2.8   |
| ACGS         | [c] : accoa + glu-L --> acglu + coa + h                                                            | 0         | Infinity | 0.00               | 2.3.1.1   |
| ACHBS        | [c] : 2obut + h + pyr --> 2ahbut + co2                                                             | 0         | Infinity | 0.00               |           |
| ACLS         | [c] : h + (2) pyr --> alac-S + co2                                                                 | 0         | Infinity | 0.01               | 4.1.3.18  |
| ACMAT1       | [c] : acACP + h + malACP --> ACP + actACP + co2                                                    | 0         | Infinity | 0.00               | 2.3.1.41  |
| ACONT        | [c] : cit <==> icit                                                                                | -Infinity | Infinity | 0.00               | 4.2.1.3   |
| ACOTA        | [c] : acorn + akglu <==> acg5sa + glu-L                                                            | -Infinity | Infinity | -0.01              | 2.6.1.11  |
| ACPS1        | [c] : apoACP + coa --> ACP + h + pap                                                               | 0         | Infinity | 0.00               | 2.7.8.7   |
| ACS          | [c] : ac + atp + coa --> accoa + amp + ppi                                                         | 0         | Infinity | 0.19               | 6.2.1.1   |
| ACt6         | ac[e] + h[e] <==> ac[c] + h[c]                                                                     | -Infinity | Infinity | 0.18               |           |
| ADCL         | [c] : 4adcho --> 4abz + h + pyr                                                                    | 0         | Infinity | 0.00               |           |
| ADCOBAK      | [c] : adcoba + atp --> adcobap + adp + h                                                           | 0         | Infinity | 0.00               |           |
| ADCOBAS      | [c] : 1ap2ol + adcobhex --> adcoba + h2o                                                           | 0         | Infinity | 0.00               |           |
| ADCOBHEXS    | [c] : adcobdam + (4) atp + (4) gln-L + (4) h2o --> adcobhex + (4) adp + (4) glu-L + (4) h + (4) pi | 0         | Infinity | 0.00               |           |
| ADCOBHS      | [c] : 1ap2ol + adcobhex <==> adcoba + h2o                                                          | -Infinity | Infinity | 0.00               | 3.5.1     |
| ADCPS2       | [c] : 1ap2olp + adcobhex + atp --> adcobap + adp + h + pi                                          | 0         | Infinity | 0.00               |           |
| ADCS         | [c] : chor + gln-L --> 4adcho + glu-L                                                              | 0         | Infinity | 0.00               |           |
| ADD          | [c] : ade + h + h2o --> hxan + nh4                                                                 | 0         | Infinity | 0.00               | 3.5.4.2   |
| ADK1         | [c] : amp + atp <==> (2) adp                                                                       | -Infinity | Infinity | 0.26               | 2.7.4.3   |
| ADK2         | [c] : amp + pppi <==> adp + ppi                                                                    | -Infinity | Infinity | 0.00               | 2.7.4.3   |
| ADK3         | [c] : amp + gtp <==> adp + gdp                                                                     | -Infinity | Infinity | 0.00               | 2.7.4.8   |
| ADK4         | [c] : amp + itp <==> adp + idp                                                                     | -Infinity | Infinity | 0.00               |           |
| ADNCYC       | [c] : atp --> camp + ppi                                                                           | 0         | Infinity | 0.00               | 4.6.1.1   |
| ADNK1        | [c] : adn + atp --> adp + amp + h                                                                  | 0         | Infinity | 0.00               | 2.7.1.20  |
| ADPRDP       | [c] : adprib + h2o --> amp + (2) h + r5p                                                           | 0         | Infinity | 0.00               | 3.6.1.13  |
| ADPT         | [c] : ade + prpp --> amp + ppi                                                                     | 0         | Infinity | 0.00               | 2.4.2.7   |
| ADSL1        | [c] : dcamp --> amp + fum                                                                          | 0         | Infinity | 0.00               | 4.3.2.2   |
| ADSL2        | [c] : 25aics --> aicar + fum                                                                       | 0         | Infinity | 0.00               | 4.3.2.2   |
| ADSS         | [c] : asp-L + gtp + imp --> dcamp + gdp + (2) h + pi                                               | 0         | Infinity | 0.00               | 6.3.4.4   |
| AGMT         | [c] : agm + h2o --> ptrc + urea                                                                    | 0         | Infinity | 0.00               | 3.5.3.11  |
| AGPR         | [c] : acg5sa + nadp + pi <==> acg5p + h + nadph                                                    | -Infinity | Infinity | -0.01              | 1.2.1.38  |



| Abbreviation | Equation                                              | LB        | UB       | Flux (mmol/gDCW/h) | EC Number |
|--------------|-------------------------------------------------------|-----------|----------|--------------------|-----------|
| AHC          | [c] : ahcys + h2o <==> adn + hcys-L                   | -Infinity | Infinity | 0.00               | 3.3.1.1   |
| AHMMPs       | [c] : air + h2o --> 4ahmmp + gcald + (0.5) o2 + pi    | 0         | Infinity | 0.00               |           |
| AICART       | [c] : 10fthf + aicar <==> fprica + thf                | -Infinity | Infinity | 0.01               | 2.1.2.3   |
| AIRC         | [c] : air + co2 --> 5aizc + h                         | 0         | Infinity | 0.00               | 4.1.1.21  |
| ALAALA       | [c] : (2) ala-D + atp <==> adp + alaala + h + pi      | -Infinity | Infinity | 0.00               | 6.3.2.4   |
| ALAR         | [c] : ala-L <==> ala-D                                | -Infinity | Infinity | 0.00               | 5.1.1.1   |
| ALATA_D2     | [c] : ala-D + pydx5p --> pyam5p + pyr                 | 0         | Infinity | 0.00               |           |
| ALATA_L      | [c] : akg + ala-L <==> glu-L + pyr                    | -Infinity | Infinity | -0.01              | 2.6.1.2   |
| ALATA_L2     | [c] : ala-L + pydx5p --> pyam5p + pyr                 | 0         | Infinity | 0.00               |           |
| ALATRS       | [c] : ala-L + atp + trnaala --> alatrna + amp + ppi   | 0         | Infinity | 0.00               | 6.1.1.7   |
| ALCD19       | [c] : glyald + h + nadh <==> glyc + nad               | -Infinity | Infinity | 0.00               | 1.1.1.1   |
| ALCD2x       | [c] : etoh + nad <==> acald + h + nadh                | -Infinity | Infinity | 0.00               | 1.1.1.1   |
| ALCD3        | [c] : nad + ppoh <==> h + nadh + ppal                 | -Infinity | Infinity | 0.00               | 1.1.1.1   |
| ALDD8b       | [c] : glyald + h2o + nad <==> glyc-R + (2) h + nadh   | -Infinity | Infinity | 0.00               | 1.2.1.3   |
| AMAOT        | [c] : 8aonn + amet <==> amob + dann                   | -Infinity | Infinity | 0.00               | 2.6.1.62  |
| AMPMS        | [c] : air + h2o --> 4ampm + (2) for + (4) h           | 0         | Infinity | 0.00               |           |
| ANPRT        | [c] : anth + prpp --> ppi + pran                      | 0         | Infinity | 0.00               | 2.4.2.18  |
| ANS1         | [c] : chor + gln-L --> anth + glu-L + h + pyr         | 0         | Infinity | 0.00               | 4.1.3.27  |
| ANTIMt1      | antim[c] --> antim[e]                                 | 0         | Infinity | 0.00               |           |
| APRAUR       | [c] : 5apru + h + nadph --> 5aprbu + nadp             | 0         | Infinity | 0.00               | 1.1.1.193 |
| APSPT        | [c] : aps + trdrd <==> amp + (2) h + so3 + trdox      | -Infinity | Infinity | 0.00               |           |
| APYRH        | [c] : 3fpyr + h2o --> fum + h + pyr                   | 0         | Infinity | 0.00               | 3.7.1.5   |
| ARGDC        | [c] : arg-L + h --> agm + co2                         | 0         | Infinity | 0.00               | 4.1.1.19  |
| ARGSL        | [c] : argsuc <==> arg-L + fum                         | -Infinity | Infinity | 0.00               | 4.3.2.1   |
| ARGSS        | [c] : asp-L + atp + citr-L --> amp + argsuc + h + ppi | 0         | Infinity | 0.00               | 6.3.4.5   |
| ARGTRS       | [c] : arg-L + atp + trnaarg --> amp + argtrna + ppi   | 0         | Infinity | 0.00               | 6.1.1.19  |
| ARSNA1       | arsna[c] --> arsna[e]                                 | 0         | Infinity | 0.00               |           |
| ARSt1        | arsni2[c] --> arsni2[e]                               | 0         | Infinity | 0.00               |           |
| ASAD         | [c] : aspsa + nadp + pi <==> 4pasp + h + nadph        | -Infinity | Infinity | -0.01              | 1.2.1.11  |
| ASNS2        | [c] : asp-L + atp + nh4 --> amp + asn-L + h + ppi     | 0         | Infinity | 0.00               | 6.3.1.1   |
| ASP1DC       | [c] : asp-L + h --> ala-B + co2                       | 0         | Infinity | 0.00               | 4.1.1.11  |
| ASPCT        | [c] : asp-L + cbp --> cbasp + h + pi                  | 0         | Infinity | 0.01               | 2.1.3.2   |
| ASPK         | [c] : asp-L + atp <==> 4pasp + adp                    | -Infinity | Infinity | 0.01               | 2.7.2.4   |
| ASPO1        | [c] : asp-L + nad --> (2) h + iasp + nadh             | 0         | Infinity | 0.00               |           |
| ASPO3        | [c] : asp-L + ubq8 --> h + iasp + ubq8h2              | 0         | Infinity | 0.00               |           |
| ASPO4        | [c] : asp-L + mqn8 --> h + iasp + mql8                | 0         | Infinity | 0.00               |           |
| ASPO5        | [c] : asp-L + fum --> h + iasp + succ                 | 0         | Infinity | 0.00               |           |
| ASPO6        | [c] : asp-L + o2 --> h + h2o2 + iasp                  | 0         | Infinity | 0.00               |           |

| Abbreviation | Equation                                                                                                                  | LB        | UB       | Flux (mmol/gDCW/h) | EC Number |
|--------------|---------------------------------------------------------------------------------------------------------------------------|-----------|----------|--------------------|-----------|
| ASPT         | [c] : asp-L --> fum + nh4                                                                                                 | 0         | Infinity | 0.00               | 4.3.1.1   |
| ASPTA1       | [c] : akgl + asp-L <==> glu-L + oaa                                                                                       | -Infinity | Infinity | -0.04              | 2.6.1.1   |
| ASPTRS       | [c] : asp-L + atp + trnaasp --> amp + asptrna + ppi                                                                       | 0         | Infinity | 0.00               | 6.1.1.12  |
| ATPM         | [c] : atp + h2o --> adp + h + pi                                                                                          | 1.8       | 1.8      | 1.80               |           |
| ATPPRT       | [c] : atp + prpp --> ppi + prbatp                                                                                         | 0         | Infinity | 0.00               | 2.4.2.17  |
| ATPS3r       | adp[c] + (3) h[e] + pi[c] <==> atp[c] + (2) h[c] + h2o[c]                                                                 | -Infinity | Infinity | 3.50               |           |
| BACCL        | [c] : atp + btn + h --> btamp + ppi                                                                                       | 0         | Infinity | 0.00               | 6.3.4.15  |
| BTMAT1       | [c] : 2beACP + h + nadh --> butACP + nad                                                                                  | 0         | Infinity | 0.00               | 1.3.1.10  |
| BTS          | [c] : dtbt + (2) s --> btn + h + h2s                                                                                      | 0         | Infinity | 0.00               | 2.8.1.6   |
| CBIAT        | [c] : atp + cbi + h2o <==> adcoaba + pi + ppi                                                                             | -Infinity | Infinity | 0.00               | 2.5.1.17  |
| CBL1abc      | atp[c] + cbl1[e] + h2o[c] --> adp[c] + cbl1[c] + h[c] + pi[c]                                                             | 0         | Infinity | 0.00               |           |
| CBLATr       | [c] : atp + cbl1 + h <==> adocbl + ppi                                                                                    | -Infinity | Infinity | 0.00               | 2.5.1.17  |
| CBPSr        | [c] : (2) atp + gln-L + h2o + hco3 <==> (2) adp + cbp + glu-L + (2) h + pi                                                | -Infinity | Infinity | 0.01               | 6.3.5.5   |
| CDGPT        | [c] : cdpdag + glyc3p --> cmp + h + pglyp                                                                                 | 0         | Infinity | 0.00               |           |
| CDPDSP       | [c] : cdpdag + ser-L --> cmp + h + ps                                                                                     | 0         | Infinity | 0.00               | 2.7.8.8   |
| CDPMEK       | [c] : 4c2me + atp --> 2p4c2me + adp + h                                                                                   | 0         | Infinity | 0.00               |           |
| CERD         | (8) fdred[c] + (4) h[c] + pce[e] --> (4) c[e] + etl[e] + (8) fdox[c]                                                      | 0         | Infinity | 0.00               |           |
| CHORM        | [c] : chor --> pphn                                                                                                       | 0         | Infinity | 0.00               | 5.4.99.5  |
| CHORS        | [c] : 3psme --> chor + pi                                                                                                 | 0         | Infinity | 0.01               | 4.2.3.5   |
| CITRMS       | [c] : accoa + h + h2o + pyr <==> citmal + coa                                                                             | -Infinity | Infinity | 0.00               | 2.3.1     |
| CITt6        | cit[e] + h[e] <==> cit[c] + h[c]                                                                                          | -Infinity | Infinity | 0.00               |           |
| CLPNS        | [c] : cdpdag + pgly --> cdlp + cmp + h                                                                                    | 0         | Infinity | 0.00               |           |
| CMLDC        | [c] : 2c25dho + h --> 5odhf2a + co2                                                                                       | 0         | Infinity | 0.00               | 4.1.1.44  |
| CO2t         | co2[e] <==> co2[c]                                                                                                        | -Infinity | Infinity | 0.17               |           |
| COBALt5      | cobalt2[c] <==> cobalt2[e]                                                                                                | -Infinity | Infinity | 0.00               |           |
| COBPS        | [c] : adgcoba + rdmbzi --> cobamcoa + gmp + h                                                                             | 0         | Infinity | 0.00               |           |
| COBPS2       | [c] : adgcoba + rdmbzi <==> adocbl + gmp + h                                                                              | -Infinity | Infinity | 0.00               |           |
| CODHr        | [c] : co + (2) fdox + h2o <==> co2 + (2) fdred + (2) h                                                                    | -Infinity | Infinity | 0.00               | 1.2.99.2  |
| CPC3MT       | [c] : amet + copre3 + h --> ahcys + copre4                                                                                | 0         | Infinity | 0.00               | 2.1.1.131 |
| CPC6MT       | [c] : (2) amet + codhpre6 --> (2) ahcys + co2 + copre8 + h                                                                | 0         | Infinity | 0.00               | 2.1.1.132 |
| CPPPGOAN2    | [c] : (2) amet + cpppg3 + (4) fdox + (2) nadph --> (2) co2 + (2) dad-5 + (4) fdred + (2) h + (2) met-L + (2) nadp + pppg9 | 0         | Infinity | 0.00               |           |
| CTPS1        | [c] : atp + nh4 + utp --> adp + ctp + (2) h + pi                                                                          | 0         | Infinity | 0.00               | 6.3.4.2   |

| Abbreviation | Equation                                                                                                | LB        | UB       | Flux (mmol/gDCW/h) | EC Number |
|--------------|---------------------------------------------------------------------------------------------------------|-----------|----------|--------------------|-----------|
| CTPS2        | [c] : atp + gln-L + h2o + utp --> adp + ctp + glu-L + (2) h + pi                                        | 0         | Infinity | 0.00               | 6.3.4.2   |
| Cuabc        | atp[c] + cu2[e] + h2o[c] --> adp[c] + cu2[c] + h[c] + pi[c]                                             | 0         | Infinity | 0.00               |           |
| CYRDAAT      | [c] : atp + co1dam + h --> adco1dam + pppi                                                              | 0         | Infinity | 0.00               | 2.5.1.17  |
| CYRDAS       | [c] : (4) atp + (2) cobrmt + (4) gln-L + (2) h2o --> (4) adp + (2) co2dam + (4) glu-L + (2) h + (2) ppi | 0         | Infinity | 0.00               |           |
| CYSS         | [c] : acser + h2s --> ac + cys-L                                                                        | 0         | Infinity | 0.00               | 4.2.99.8  |
| CYSTRS       | [c] : atp + cys-L + trnacys --> amp + cystrna + ppi                                                     | 0         | Infinity | 0.00               | 6.1.1.16  |
| CYTK1        | [c] : atp + cmp <==> adp + cdp                                                                          | -Infinity | Infinity | 0.00               | 2.7.4.14  |
| CYTK2        | [c] : atp + dcmp <==> adp + dcdp                                                                        | -Infinity | Infinity | 0.00               | 2.7.4.14  |
| DADK         | [c] : atp + damp <==> adp + dadp                                                                        | -Infinity | Infinity | 0.00               | 2.7.4.11  |
| DAGK         | [c] : 12dgr + atp --> 12dag3p + adp + h                                                                 | 0         | Infinity | 0.00               | 2.7.1.107 |
| DAHPS        | [c] : e4p + h2o + pep --> 2dda7p + pi                                                                   | 0         | Infinity | 0.01               | 4.1.2.15  |
| DAPAT        | [c] : 26dap-LL + akglu <==> glu-L + h + h2o + thdp                                                      | -Infinity | Infinity | -0.01              |           |
| DAPDC        | [c] : 26dap-M + h --> co2 + lys-L                                                                       | 0         | Infinity | 0.01               | 4.1.1.20  |
| DAPE         | [c] : 26dap-LL <==> 26dap-M                                                                             | -Infinity | Infinity | 0.01               | 5.1.1.7   |
| DB4PS        | [c] : ru5p-D --> db4p + for + h                                                                         | 0         | Infinity | 0.00               |           |
| DCMPDA2ir    | [c] : dcmp + h + h2o --> dump + nh4                                                                     | 0         | Infinity | 0.00               | 3.5.4.12  |
| DCMPDA3ir    | [c] : cmp + h + h2o --> nh4 + ump                                                                       | 0         | Infinity | 0.00               | 3.5.4.12  |
| DDMAT5       | [c] : 2tdcACP + h + nadh --> ddcaACP + nad                                                              | 0         | Infinity | 0.00               | 1.3.1.10  |
| DEMAT4       | [c] : 2tdeACP + h + nadh --> decACP + nad                                                               | 0         | Infinity | 0.00               | 1.3.1.10  |
| DGK1         | [c] : atp + dgmp <==> adp + dgdp                                                                        | -Infinity | Infinity | 0.00               |           |
| DGTPH        | [c] : dgtp + h2o --> dgsn + pppi                                                                        | 0         | Infinity | 0.00               | 3.1.5.1   |
| DHAD1        | [c] : 23dhmb --> 3mob + h2o                                                                             | 0         | Infinity | 0.01               | 4.2.1.9   |
| DHAD2        | [c] : 23dhmp --> 3mop + h2o                                                                             | 0         | Infinity | 0.00               |           |
| DHAD3        | [c] : 23dhmp --> 2o3mpt + h2o                                                                           | 0         | Infinity | 0.00               | 4.2.1.9   |
| DHDPRy       | [c] : 23dhdp + h + nadph --> nadp + thdp                                                                | 0         | Infinity | 0.01               | 1.3.1.26  |
| DHDPS        | [c] : aspsa + pyr --> 23dhdp + h + (2) h2o                                                              | 0         | Infinity | 0.01               | 4.2.1.52  |
| DHFOR2       | [c] : dhf + nadp <==> fol + nadph                                                                       | -Infinity | Infinity | 0.00               | 1.5.1.3   |
| DHFOR3       | [c] : fol + h + (2) nadp <==> (2) nadp + thf                                                            | -Infinity | Infinity | 0.00               | 1.5.1.3   |
| DHFR         | [c] : dhf + h + nadph <==> nadp + thf                                                                   | -Infinity | Infinity | 0.00               | 1.5.1.3   |
| DHFS         | [c] : atp + dhpt + glu-L --> adp + dhf + h + pi                                                         | 0         | Infinity | 0.00               | 6.3.2.12  |
| DHNAOT       | [c] : dhna + nad + octdp --> 2dmmq8 + co2 + nadh + ppi                                                  | 0         | Infinity | 0.00               |           |
| DHNPA        | [c] : dhnpt --> 2ahhmp + gcald                                                                          | 0         | Infinity | 0.00               | 4.1.2.25  |
| DHORDf       | [c] : dhor-S + (2) fdox <==> (2) fdred + (2) h + orot                                                   | -Infinity | Infinity | 0.01               | 1.3.99.11 |
| DHORTS       | [c] : dhor-S + h2o <==> cbasp + h                                                                       | -Infinity | Infinity | -0.01              | 3.5.2.3   |
| DHPDA2       | [c] : 25dhpp + h + h2o --> 5apru + nh4                                                                  | 0         | Infinity | 0.00               | 3.5.4.26  |

| Abbreviation    | Equation                                                    | LB        | UB       | Flux (mmol/gDCW/h) | EC Number |
|-----------------|-------------------------------------------------------------|-----------|----------|--------------------|-----------|
| DHPS1           | [c] : 2ahhmp + 4abz --> dhpt + h2o                          | 0         | Infinity | 0.00               | 2.5.1.15  |
| DHPS3           | [c] : 2ahhmd + 4abz --> dhpt + ppi                          | 0         | Infinity | 0.00               | 2.5.1.15  |
| DHQD            | [c] : 3dhq <==> 3dhsK + h2o                                 | -Infinity | Infinity | 0.01               | 4.2.1.10  |
| DHQS            | [c] : 2dda7p --> 3dhq + pi                                  | 0         | Infinity | 0.01               | 4.2.3.4   |
| DMATT           | [c] : dmpp + ipdp --> grdp + ppi                            | 0         | Infinity | 0.00               | 2.5.1.1   |
| DMPPS           | [c] : h + h2mb4p + nadh --> dmpp + h2o + nad                | 0         | Infinity | 0.00               |           |
| DMQMT           | [c] : 2omhmb1 + amet --> ahcys + h + ubq8h2                 | 0         | Infinity | 0.00               |           |
| DNMPPA          | [c] : dhmp + h2o --> dhnt + pi                              | 0         | Infinity | 0.00               |           |
| DNTPPA          | [c] : ahdt + h2o --> dhmp + h + ppi                         | 0         | Infinity | 0.00               |           |
| DPCOAK          | [c] : atp + dpcoa --> adp + coa + h                         | 0         | Infinity | 0.00               | 2.7.1.24  |
| DPR             | [c] : 2dhp + h + nadph --> nadp + pant-R                    | 0         | Infinity | 0.00               | 1.1.1.169 |
| DTMPK           | [c] : atp + dtmp <==> adp + dtdp                            | -Infinity | Infinity | 0.00               | 2.7.4.9   |
| DUTPDP          | [c] : dutp + h2o --> dump + h + ppi                         | 0         | Infinity | 0.00               | 3.6.1.23  |
| DXPRI           | [c] : dxy15p + h + nadph <==> 2me4p + nadp                  | -Infinity | Infinity | 0.00               |           |
| DXPS            | [c] : g3p + h + pyr --> co2 + dxy15p                        | 0         | Infinity | 0.00               |           |
| E4PD            | [c] : e4p + h2o + nad <==> 4per + (2) h + nadh              | -Infinity | Infinity | 0.00               |           |
| ENO             | [c] : 2pg <==> h2o + pep                                    | -Infinity | Infinity | -0.03              | 4.2.1.11  |
| F1PK            | [c] : atp + f1p --> adp + fdp + h                           | 0         | Infinity | 0.00               | 2.7.1.56  |
| FA120ACPH       | [c] : ddcaACP + h2o <==> ACP + ddca + h                     | -Infinity | Infinity | 0.00               | 3.1.2.14  |
| FA140ACPH       | [c] : h2o + myrsACP <==> ACP + h + ttdca                    | -Infinity | Infinity | 0.00               | 3.1.2.14  |
| FA160ACPH       | [c] : h2o + palmACP <==> ACP + h + hdca                     | -Infinity | Infinity | 0.00               | 3.1.2.14  |
| FA180ACPH       | [c] : h2o + ocdACP <==> ACP + h + ocdca                     | -Infinity | Infinity | 0.00               | 3.1.2.14  |
| FA200ACPH       | [c] : h2o + icsACP <==> ACP + h + icsa                      | -Infinity | Infinity | 0.00               | 3.1.2.14  |
| FACOAL120       | [c] : atp + coa + ddca <==> amp + ddcoa + ppi               | -Infinity | Infinity | 0.00               | 6.2.1.3   |
| FACOAL140       | [c] : atp + coa + ttdca <==> amp + ppi + tdcoa              | -Infinity | Infinity | 0.00               | 6.2.1.3   |
| FACOAL160       | [c] : atp + coa + hdca <==> amp + pmtcoa + ppi              | -Infinity | Infinity | 0.00               | 6.2.1.3   |
| FACOAL170(IS O) | [c] : atp + coa + fa11 <==> amp + fa11coa + ppi             | -Infinity | Infinity | 0.00               | 6.2.1.3   |
| FACOAL180       | [c] : atp + coa + ocdca <==> amp + ppi + strcoa             | -Infinity | Infinity | 0.00               | 6.2.1.3   |
| FACOAL181       | [c] : atp + coa + ocdcea <==> amp + odecoca + ppi           | -Infinity | Infinity | 0.00               | 6.2.1.3   |
| FACOAL200       | [c] : atp + coa + icsa <==> amp + icscoa + ppi              | -Infinity | Infinity | 0.00               | 6.2.1.3   |
| FBA             | [c] : fdp <==> dhap + g3p                                   | -Infinity | Infinity | -0.01              | 4.1.2.13  |
| FBP             | [c] : fdp + h2o --> f6p + pi                                | 0         | Infinity | 0.01               | 3.1.3.11  |
| FCLPA           | [c] : fc1p <==> dhap + lald-L                               | -Infinity | Infinity | 0.00               | 4.1.2.17  |
| FDS             | [c] : dump + fadh2 + mlthf --> dtmp + fad + thf             | 0         | Infinity | 0.00               |           |
| FE2abc          | atp[c] + fe2[e] + h2o[c] --> adp[c] + fe2[c] + h[c] + pi[c] | 0         | Infinity | 0.00               |           |
| FMETDF          | [c] : fmet + h2o --> for + met-L                            | 0         | Infinity | 0.00               | 3.5.1.31  |
| FMETTRS         | [c] : 10fthf + mettrna --> fmettrna + thf                   | 0         | Infinity | 0.00               | 2.1.2.9   |
| FMNAT           | [c] : atp + fmn + h --> fad + ppi                           | 0         | Infinity | 0.00               | 2.7.7.2   |

| Abbreviation | Equation                                                             | LB        | UB       | Flux (mmol/gDCW/h) | EC Number |
|--------------|----------------------------------------------------------------------|-----------|----------|--------------------|-----------|
| FNOR2        | [c] : (2) fdred + h + nadp <==> (2) fdox + nadph                     | -Infinity | Infinity | 0.23               | 1.18.1.2  |
| FRD5         | [c] : mqn7 + succ <==> fum + mql7                                    | -Infinity | Infinity | -0.02              | 1.3.5.1   |
| FRHD         | (2) fdox[c] + h2[e] <==> (2) fdred[c] + (2) h[e]                     | -Infinity | Infinity | 10                 | 1.12.7    |
| FRTT         | [c] : frdp + ipdp --> ggdp + ppi                                     | 0         | Infinity | 0.00               | 2.5.1.29  |
| FTHFD        | [c] : 10fthf + h2o --> for + h + thf                                 | 0         | Infinity | 0.00               | 3.5.1.10  |
| FTHFLr       | [c] : atp + for + thf <==> 10fthf + adp + pi                         | -Infinity | Infinity | 0.00               | 6.3.4.3   |
| FUM          | [c] : fum + h2o <==> mal-L                                           | -Infinity | Infinity | 0.00               | 4.2.1.2   |
| G1PACT       | [c] : accoa + gam1p --> acgam1p + coa + h                            | 0         | Infinity | 0.00               | 2.3.1.157 |
| G1PTMT       | [c] : dttp + g1p + h --> dtdpglc + ppi                               | 0         | Infinity | 0.00               | 2.7.7.24  |
| G3PD1        | [c] : glyc3p + nad <==> dhap + h + nadh                              | -Infinity | Infinity | 0.04               | 1.1.1.94  |
| G3PD2        | [c] : glyc3p + nadp <==> dhap + h + nadph                            | -Infinity | Infinity | -0.04              | 1.1.1.94  |
| G5SADs       | [c] : glu5sa <==> 1pyr5c + h + h2o                                   | -Infinity | Infinity | 0.00               |           |
| G5SD         | [c] : glu5p + h + nadph --> glu5sa + nadp + pi                       | 0         | Infinity | 0.00               | 1.2.1.41  |
| GALU         | [c] : g1p + h + utp <==> ppi + udpg                                  | -Infinity | Infinity | 0.00               | 2.7.7.9   |
| GAPD         | [c] : g3p + nad + pi <==> 13dpg + h + nadh                           | -Infinity | Infinity | -0.03              | 1.2.1.12  |
| GARFT        | [c] : 10fthf + gar <==> fgam + h + thf                               | -Infinity | Infinity | 0.00               | 2.1.2.2   |
| GCCc         | [c] : dhlpro + nad --> h + lpro + nadh                               | 0         | Infinity | 0.00               | 1.8.1.4   |
| GF6PTA       | [c] : f6p + gln-L --> gam6p + glu-L                                  | 0         | Infinity | 0.00               | 2.6.1.16  |
| GGTT         | [c] : ggdp + ipdp --> pendp + ppi                                    | 0         | Infinity | 0.00               |           |
| GHMT         | [c] : ser-L + thf <==> gly + h2o + mlthf                             | -Infinity | Infinity | 0.01               | 2.1.2.1   |
| GK1          | [c] : atp + gmp <==> adp + gdp                                       | -Infinity | Infinity | 0.00               | 2.7.4.8   |
| GLCS1        | [c] : adpglc --> adp + glycogen + h                                  | 0         | Infinity | 0.00               | 2.4.1.21  |
| GLGC         | [c] : atp + g1p + h --> adpglc + ppi                                 | 0         | Infinity | 0.00               | 2.7.7.27  |
| GLNabc       | atp[c] + gln-L[e] + h2o[c] --> adp[c] + gln-L[c] + h[c] + pi[c]      | 0         | Infinity | 0.00               |           |
| GLNS         | [c] : atp + glu-L + nh4 --> adp + gln-L + h + pi                     | 0         | Infinity | 0.12               | 6.3.1.2   |
| GLNTRS       | [c] : atp + gln-L + trnagln --> amp + glntrna + ppi                  | 0         | Infinity | 0.00               | 6.1.1.18  |
| GLU5K        | [c] : atp + glu-L --> adp + glu5p                                    | 0         | Infinity | 0.00               | 2.7.2.11  |
| GLUADT       | [c] : atp + gln-L + glutrna + h2o --> adp + glntrna + glu-L + h + pi | 0         | Infinity | 0.00               |           |
| GLUPRT       | [c] : gln-L + h2o + prpp --> glu-L + ppi + pram                      | 0         | Infinity | 0.00               | 2.4.2.14  |
| GLUSx        | [c] : akgl + gln-L + h + nadh --> (2) glu-L + nad                    | 0         | Infinity | 0.00               | 1.4.1.14  |
| GLUSy        | [c] : akgl + gln-L + h + nadph --> (2) glu-L + nadp                  | 0         | Infinity | 0.10               | 1.4.1.13  |
| GLUTRS       | [c] : atp + glu-L + trnaglu --> amp + glutrna + ppi                  | 0         | Infinity | 0.00               | 6.1.1.17  |
| GLYBt6       | glyb[e] + h[e] <==> glyb[c] + h[c]                                   | -Infinity | Infinity | 0.00               |           |
| GLYOX        | [c] : h2o + lgt-S --> gthrd + h + lac-D                              | 0         | Infinity | 0.00               | 3.1.2.6   |
| GLYTRS       | [c] : atp + gly + trnagly --> amp + glytrna + ppi                    | 0         | Infinity | 0.00               | 6.1.1.14  |
| GMPR         | [c] : gmp + (2) h + nadph --> imp + nadp + nh4                       | 0         | Infinity | 0.00               | 1.7.1.7   |
| GMPS2        | [c] : atp + gln-L + h2o + xmp --> amp + glu-L + gmp + (2) h + ppi    | 0         | Infinity | 0.00               | 6.3.5.2   |

| Abbreviation | Equation                                                 | LB        | UB       | Flux (mmol/gDCW/h) | EC Number |
|--------------|----------------------------------------------------------|-----------|----------|--------------------|-----------|
| GRTT         | [c] : grdp + ipdp --> frdp + ppi                         | 0         | Infinity | 0.00               | 2.5.1.10  |
| GTPCI        | [c] : gtp + h2o --> ahdt + for + h                       | 0         | Infinity | 0.00               | 3.5.4.16  |
| GTPCII       | [c] : gtp + (3) h2o --> 25dhpp + for + (2) h + ppi       | 0         | Infinity | 0.00               | 3.5.4.25  |
| GTPDK        | [c] : atp + gtp --> amp + gdptp + h                      | 0         | Infinity | 0.00               | 2.7.6.5   |
| GUAPRT       | [c] : gua + prpp --> gmp + ppi                           | 0         | Infinity | 0.00               |           |
| H2Ot5        | h2o[e] <==> h2o[c]                                       | -Infinity | Infinity | -0.51              |           |
| H2td         | h2[c] <==> h2[e]                                         | -Infinity | Infinity | 0.00               |           |
| HBUHL1       | [c] : 3hbACP --> 2beACP + h2o                            | 0         | Infinity | 0.00               | 4.2.1.58  |
| HBUR1        | [c] : actACP + h + nadph --> 3hbACP + nadp               | 0         | Infinity | 0.00               | 1.1.1.100 |
| HCITS        | [c] : accoa + akp + h2o --> coa + h + hcit               | 0         | Infinity | 0.00               | 4.1.3.21  |
| HCO3E        | [c] : co2 + h2o <==> h + hco3                            | -Infinity | Infinity | 0.07               | 4.2.1.1   |
| HDDHL5       | [c] : 3hddACP --> 2tdACP + h2o                           | 0         | Infinity | 0.00               | 4.2.1.58  |
| HDDR5        | [c] : 3oxddACP + h + nadph --> 3hddACP + nadp            | 0         | Infinity | 0.00               | 1.1.1.100 |
| HDEHL4       | [c] : 3hdeACP --> 2tdeACP + h2o                          | 0         | Infinity | 0.00               | 4.2.1.58  |
| HDER4        | [c] : 3oxdeACP + h + nadph --> 3hdeACP + nadp            | 0         | Infinity | 0.00               | 1.1.1.100 |
| HDMAT7       | [c] : nad + palmACP <==> h + hdeACP + nadh               | -Infinity | Infinity | 0.00               | 1.3.1.10  |
| HEMAT2       | [c] : 2theACP + h + nadh --> hexACP + nad                | 0         | Infinity | 0.00               | 1.3.1.10  |
| HEPTT        | [c] : hepdp + ipdp --> octdp + ppi                       | 0         | Infinity | 0.00               |           |
| HEX1         | [c] : atp + glc-D --> adp + g6p + h                      | 0         | Infinity | 0.00               | 2.7.1.2   |
| HEXTT        | [c] : hexdp + ipdp --> hepdp + ppi                       | 0         | Infinity | 0.00               | 2.5.1.30  |
| HGR          | [c] : hg2 + nadph <==> h + hg0 + nadp                    | -Infinity | Infinity | 0.00               | 1.16.1.1  |
| HHDDL7       | [c] : 3hpaACP --> h2o + hdeACP                           | 0         | Infinity | 0.00               | 4.2.1.58  |
| HHDR7        | [c] : 3oxhdACP + h + nadph --> 3hpaACP + nadp            | 0         | Infinity | 0.00               | 1.1.1.100 |
| HHYHL2       | [c] : 3hhACP --> 2theACP + h2o                           | 0         | Infinity | 0.00               | 4.2.1.58  |
| HHYR2        | [c] : 3oxhACP + h + nadph --> 3hhACP + nadp              | 0         | Infinity | 0.00               | 1.1.1.100 |
| HICHL9       | [c] : 3hicsacp --> 2ticsacp + h2o                        | 0         | Infinity | 0.00               | 4.2.1.58  |
| HICR9        | [c] : 3oxicsacp + h + nadph --> 3hicsacp + nadp          | 0         | Infinity | 0.00               | 1.1.1.100 |
| HISTD        | [c] : h2o + histd + (2) nad --> (3) h + his-L + (2) nadh | 0         | Infinity | 0.00               | 1.1.1.23  |
| HISTP        | [c] : h2o + hisp --> histd + pi                          | 0         | Infinity | 0.00               | 3.1.3.15  |
| HISTR5       | [c] : atp + his-L + trnahis --> amp + histrna + ppi      | 0         | Infinity | 0.00               | 6.1.1.21  |
| HMPK1        | [c] : 4ahmmp + atp --> 4ampm + adp + h                   | 0         | Infinity | 0.00               | 2.7.1.49  |
| HMPK2        | [c] : 4ahmmp + ctp --> 4ampm + cdp + h                   | 0         | Infinity | 0.00               | 2.7.1.49  |
| HMPK3        | [c] : 4ahmmp + utp --> 4ampm + h + udp                   | 0         | Infinity | 0.00               | 2.7.1.49  |
| HMPK4        | [c] : 4ahmmp + gtp --> 4ampm + gdp + h                   | 0         | Infinity | 0.00               | 2.7.1.49  |
| HOCHL3       | [c] : 3hocACP --> 2toceACP + h2o                         | 0         | Infinity | 0.00               | 4.2.1.58  |
| HOCHR3       | [c] : 3oxocACP + h + nadph --> 3hocACP + nadp            | 0         | Infinity | 0.00               | 1.1.1.100 |
| HODHL8n      | [c] : 3hocdACP --> 2tocdACP + h2o                        | 0         | Infinity | 0.00               | 4.2.1.58  |
| HODR8_#1     | [c] : 3oxocdACP + h + nadph --> 3hocdACP + nadp          | 0         | Infinity | 0.00               | 1.1.1.100 |
| HPPK         | [c] : 2ahhmp + atp --> 2ahhmd + amp + h                  | 0         | Infinity | 0.00               | 2.7.6.3   |

| Abbreviation | Equation                                                                                            | LB        | UB       | Flux (mmol/gDCW/h) | EC Number |
|--------------|-----------------------------------------------------------------------------------------------------|-----------|----------|--------------------|-----------|
| HSAT         | [c] : accoa + hom-L <==> achms + coa                                                                | -Infinity | Infinity | 0.00               | 2.3.1.31  |
| HSDy         | [c] : hom-L + nadp <==> aspsa + h + nadph                                                           | -Infinity | Infinity | -0.01              | 1.1.1.3   |
| HSK          | [c] : atp + hom-L --> adp + h + phom                                                                | 0         | Infinity | 0.00               | 2.7.1.39  |
| HSPMS        | [c] : (2) ptrc --> hspmd + nh4                                                                      | 0         | Infinity | 0.00               | 2.5.1.44  |
| HSTPT        | [c] : glu-L + imacp --> agk + h + hisp                                                              | 0         | Infinity | 0.00               | 2.6.1.9   |
| HTDHL6       | [c] : 3htdACP --> h2o + tdeACP                                                                      | 0         | Infinity | 0.00               | 4.2.1.58  |
| HTDR6        | [c] : 3oxtdACP + h + nadph --> 3htdACP + nadp                                                       | 0         | Infinity | 0.00               | 1.1.1.100 |
| HXPRT        | [c] : hxan + prpp --> imp + ppi                                                                     | 0         | Infinity | 0.00               | 2.4.2.8   |
| ICDHy        | [c] : icit + nadp <==> agk + co2 + nadph                                                            | -Infinity | Infinity | 0.00               | 1.1.1.42  |
| ICSMAT9      | [c] : 2ticsacp + h + nadh --> icsACP + nad                                                          | 0         | Infinity | 0.00               | 1.3.1.10  |
| IG3PS        | [c] : gln-L + prlp --> aicar + eig3p + glu-L + (2) h                                                | 0         | Infinity | 0.00               |           |
| IGPDH        | [c] : eig3p + h --> h2o + imacp                                                                     | 0         | Infinity | 0.00               | 4.2.1.19  |
| IGPS         | [c] : 2cpr5p + h --> 3ig3p + co2 + h2o                                                              | 0         | Infinity | 0.00               | 4.1.1.48  |
| ILEabc       | atp[c] + h2o[c] + ile-L[e] --> adp[c] + h[c] + ile-L[c] + pi[c]                                     | 0         | Infinity | 0.00               |           |
| ILETA        | [c] : agk + ile-L <==> 3mop + glu-L                                                                 | -Infinity | Infinity | 0.00               | 2.6.1.42  |
| ILETRS       | [c] : atp + ile-L + trnaile --> amp + iletrna + ppi                                                 | 0         | Infinity | 0.00               | 6.1.1.5   |
| IMPcir       | [c] : fprica --> h2o + imp                                                                          | 0         | Infinity | 0.01               | 3.5.4.10  |
| IMPD         | [c] : h2o + imp + nad --> h + nadh + xmp                                                            | 0         | Infinity | 0.00               | 1.1.1.205 |
| IOR          | [c] : coa + (2) fdox + indpyr <==> co2 + (2) fdred + h + indaccoa                                   | -Infinity | Infinity | 0.00               |           |
| IOR2         | [c] : coa + (2) fdox + phpyr <==> co2 + (2) fdred + h + phaccoa                                     | -Infinity | Infinity | 0.00               |           |
| IOR3         | [c] : 34hpp + coa + (2) fdox <==> 4hphaccoa + co2 + (2) fdred + h                                   | -Infinity | Infinity | 0.00               |           |
| IPDPS        | [c] : h + h2mb4p + nadh --> h2o + ipdp + nad                                                        | 0         | Infinity | 0.00               |           |
| IPMD         | [c] : 3c2hmp + nad --> 3c4mop + h + nadh                                                            | 0         | Infinity | 0.01               | 1.1.1.85  |
| IPMDH        | [c] : de3mlt + nad <==> 2obut + co2 + (2) h + nadh                                                  | -Infinity | Infinity | 0.00               |           |
| IPMI1        | [c] : citmal <==> ccnt + h2o                                                                        | -Infinity | Infinity | 0.00               | 4.2.1.35  |
| IPMI2        | [c] : ccnt + h2o <==> de3mlt                                                                        | -Infinity | Infinity | 0.00               |           |
| IPPMla       | [c] : 3c2hmp <==> 2ippm + h2o                                                                       | -Infinity | Infinity | -0.01              | 4.2.1.33  |
| IPPMlb       | [c] : 2ippm + h2o <==> 3c3hmp                                                                       | -Infinity | Infinity | -0.01              |           |
| IPPS         | [c] : 3mob + accoa + h2o --> 3c3hmp + coa + h                                                       | 0         | Infinity | 0.01               | 4.1.3.12  |
| ITPASE       | [c] : ditp + h2o --> dimp + ppi                                                                     | 0         | Infinity | 0.00               |           |
| KARA1        | [c] : 23dhmb + nadp <==> alac-S + h + nadph                                                         | -Infinity | Infinity | -0.01              | 1.1.1.86  |
| KARA2        | [c] : 2ahbut + h + nadph <==> 23dhmp + nadp                                                         | -Infinity | Infinity | 0.00               | 1.1.1.86  |
| KAS11        | [c] : (17) h + ivcoa + (6) malcoa + (12) nadph --> (6) co2 + (7) coa + fa11 + (5) h2o + (12) nadp   | 0         | Infinity | 0.00               | 2.3.1.41  |
| KAS17        | [c] : accoa + (22) h + (8) malcoa + (15) nadph --> (8) co2 + (9) coa + (7) h2o + (15) nadp + ocdcea | 0         | Infinity | 0.00               | 2.3.1.41  |

| Abbreviation | Equation                                                                  | LB        | UB       | Flux (mmol/gDCW/h) | EC Number |
|--------------|---------------------------------------------------------------------------|-----------|----------|--------------------|-----------|
| Kt6          | $h[e] + k[e] \rightleftharpoons h[c] + k[c]$                              | -Infinity | Infinity | 0.00               |           |
| LDH_L        | $[c] : lac-L + nad \rightleftharpoons h + nadh + pyr$                     | -Infinity | Infinity | 0.00               | 1.1.1.27  |
| LEUabc       | $atp[c] + h2o[c] + leu-L[e] \rightarrow adp[c] + h[c] + leu-L[c] + pi[c]$ | 0         | Infinity | 0.00               |           |
| LEUTA        | $[c] : akG + leu-L \rightleftharpoons 4mop + glu-L$                       | -Infinity | Infinity | -0.01              | 2.6.1.42  |
| LEUTRS       | $[c] : atp + leu-L + trnaleu \rightarrow amp + leutrna + ppi$             | 0         | Infinity | 0.00               | 6.1.1.4   |
| LPADSS       | $[c] : lipidX + u23ga \rightarrow h + lipidAds + udp$                     | 0         | Infinity | 0.00               | 2.4.1.182 |
| LYSAM        | $[c] : lys-L \rightleftharpoons 36dahx$                                   | -Infinity | Infinity | 0.00               | 5.4.3.2   |
| LYSTRS       | $[c] : atp + lys-L + trnalyS \rightarrow amp + lystrna + ppi$             | 0         | Infinity | 0.00               | 6.1.1.6   |
| MACPMT       | $[c] : ACP + malcoa \rightarrow coa + malACP$                             | 0         | Infinity | 0.01               | 2.3.1.39  |
| MAN1PT1      | $[c] : gtp + h + man1p \rightarrow gdpman + ppi$                          | 0         | Infinity | 0.00               | 2.7.7.13  |
| MAN1PT2      | $[c] : gdp + h + man1p \rightarrow gdpman + pi$                           | 0         | Infinity | 0.00               | 2.7.7.22  |
| MAN6PI       | $[c] : man6p \rightleftharpoons f6p$                                      | -Infinity | Infinity | 0.00               | 5.3.1.8   |
| MCMAT2       | $[c] : butACP + h + malACP \rightarrow 3oxhACP + ACP + co2$               | 0         | Infinity | 0.00               | 2.3.1.41  |
| MCMAT3       | $[c] : h + hexACP + malACP \rightarrow 3oxocACP + ACP + co2$              | 0         | Infinity | 0.00               | 2.3.1.41  |
| MCMAT4       | $[c] : h + malACP + octACP \rightarrow 3oxdeACP + ACP + co2$              | 0         | Infinity | 0.00               | 2.3.1.41  |
| MCMAT5       | $[c] : decACP + h + malACP \rightarrow 3oxddACP + ACP + co2$              | 0         | Infinity | 0.00               | 2.3.1.41  |
| MCMAT6       | $[c] : ddcaACP + h + malACP \rightarrow 3oxtdACP + ACP + co2$             | 0         | Infinity | 0.00               | 2.3.1.41  |
| MCMAT7       | $[c] : h + malACP + myrsACP \rightarrow 3oxhdACP + ACP + co2$             | 0         | Infinity | 0.00               | 2.3.1.41  |
| MCMAT8       | $[c] : h + malACP + palmACP \rightarrow 3oxocdACP + ACP + co2$            | 0         | Infinity | 0.00               | 2.3.1.41  |
| MCMAT9       | $[c] : h + malACP + ocdACP \rightarrow 3oxicsACP + ACP + co2$             | 0         | Infinity | 0.00               | 2.3.1.41  |
| MDH          | $[c] : mal-L + nad \rightleftharpoons h + nadh + oaa$                     | -Infinity | Infinity | 0.00               | 1.1.1.37  |
| MECDPDH      | $[c] : 2mecdp + nadh \rightarrow h2mb4p + h2o + nad$                      | 0         | Infinity | 0.00               |           |
| MECDPS       | $[c] : 2p4c2me \rightarrow 2mecdp + cmp$                                  | 0         | Infinity | 0.00               |           |
| MEPCT        | $[c] : 2me4p + ctp + h \rightarrow 4c2me + ppi$                           | 0         | Infinity | 0.00               |           |
| METACH       | $[c] : achms + h2s \rightleftharpoons ac + hcys-L$                        | -Infinity | Infinity | 0.00               | 4.2.99.10 |
| METAT        | $[c] : atp + h2o + met-L \rightarrow amet + pi + ppi$                     | 0         | Infinity | 0.00               | 2.5.1.6   |
| METS         | $[c] : 5mthf + hcys-L \rightarrow h + met-L + thf$                        | 0         | Infinity | 0.00               | 2.1.1.13  |
| METSR-S1     | $[c] : metox + trdrd \rightarrow h2o + met-L + trdox$                     | 0         | Infinity | 0.00               |           |
| METSR-S2     | $[c] : h2o2 + met-L \rightarrow h2o + metox$                              | 0         | Infinity | 0.00               |           |
| METTRS       | $[c] : atp + met-L + trnamet \rightarrow amp + mettrna + ppi$             | 0         | Infinity | 0.00               | 6.1.1.10  |
| MGSA         | $[c] : dhap \rightarrow mthgl + pi$                                       | 0         | Infinity | 0.00               | 4.2.3.3   |



| Abbreviation | Equation                                                                        | LB        | UB       | Flux (mmol/gDCW/h) | EC Number |
|--------------|---------------------------------------------------------------------------------|-----------|----------|--------------------|-----------|
| MGt5         | $mg2[c] \rightleftharpoons mg2[e]$                                              | -Infinity | Infinity | 0.00               |           |
| MICITH       | $[c] : 2mcacn + h2o \rightarrow micit$                                          | 0         | Infinity | 0.00               | 4.2.1.99  |
| MNabc        | $atp[c] + h2o[c] + mn2[e] \rightarrow adp[c] + h[c] + mn2[c] + pi[c]$           | 0         | Infinity | 0.00               |           |
| MOBDabc      | $atp[c] + h2o[c] + mobd[e] \rightarrow adp[c] + h[c] + mobd[c] + pi[c]$         | 0         | Infinity | 0.00               |           |
| MOHMT        | $[c] : 3mob + h2o + mlthf \rightarrow 2dhp + thf$                               | 0         | Infinity | 0.00               | 2.1.2.11  |
| MPGSP        | $[c] : 3pg + gdpman + (2) h \rightleftharpoons 2m3pg + gdp$                     | -Infinity | Infinity | 0.00               | 2.4.1.217 |
| MTAP         | $[c] : 5mta + pi \rightarrow 5mdr1p + ade$                                      | 0         | Infinity | 0.00               | 2.4.2.28  |
| MTHFC        | $[c] : h2o + methf \rightleftharpoons 10fthf + h$                               | -Infinity | Infinity | 0.01               | 3.5.4.9   |
| MTHFD        | $[c] : mlthf + nadp \rightleftharpoons methf + nadph$                           | -Infinity | Infinity | 0.01               | 1.5.1.5   |
| MTHFR1       | $[c] : (2) h + mlthf + nadph \rightarrow 5mthf + nadp$                          | 0         | Infinity | 0.00               | 1.7.99.5  |
| MTRI         | $[c] : 5mdr1p \rightleftharpoons 5mdru1p$                                       | -Infinity | Infinity | 0.00               | 5.3.1.23  |
| N2t          | $n2[c] \rightleftharpoons n2[e]$                                                | -Infinity | Infinity | 0.00               |           |
| NADH4        | $[c] : h + mqn7 + nadh \rightarrow mql7 + nad$                                  | 0         | Infinity | 0.02               | 1.6.5.3   |
| NADH6        | $(4.5) h[c] + nadh[c] + ubq8[c] \rightarrow (3.5) h[e] + nad[c] + ubq8h2[c]$    | 0         | Infinity | 0.00               | 1.6.5.3   |
| NADH7        | $(3) h[c] + mqn8[c] + nadh[c] \rightarrow (2) h[e] + mql8[c] + nad[c]$          | 0         | Infinity | 0.00               | 1.6.5.3   |
| NADH8        | $2dmmq8[c] + (3.8) h[c] + nadh[c] \rightarrow 2dmmql8[c] + (2.8) h[e] + nad[c]$ | 0         | Infinity | 0.00               | 1.6.5.3   |
| NADK         | $[c] : atp + nad \rightarrow adp + h + nadp$                                    | 0         | Infinity | 0.00               | 2.7.1.23  |
| NADPH12      | $[c] : h + nadph + ubq8 \rightarrow nadp + ubq8h2$                              | 0         | Infinity | 0.00               | 1.6.5.5   |
| NADS1        | $[c] : atp + dnad + nh4 \rightarrow amp + h + nad + ppi$                        | 0         | Infinity | 0.00               | 6.3.1.5   |
| NADS2        | $[c] : atp + dnad + gln-L + h2o \rightarrow amp + glu-L + h + nad + ppi$        | 0         | Infinity | 0.00               | 6.3.5.1   |
| NAMNPP       | $[c] : atp + h2o + nac + prpp \rightarrow adp + nicrnt + pi + ppi$              | 0         | Infinity | 0.00               |           |
| NCTPPRT      | $[c] : nicrnt + ppi \rightleftharpoons h + nac + prpp$                          | -Infinity | Infinity | 0.00               | 2.4.2.11  |
| NDPK1        | $[c] : atp + gdp \rightleftharpoons adp + gtp$                                  | -Infinity | Infinity | 0.01               | 2.7.4.6   |
| NDPK2        | $[c] : atp + udp \rightleftharpoons adp + utp$                                  | -Infinity | Infinity | 0.01               | 2.7.4.6   |
| NDPK3        | $[c] : atp + cdp \rightleftharpoons adp + ctp$                                  | -Infinity | Infinity | 0.00               | 2.7.4.6   |
| NDPK4        | $[c] : atp + dtdp \rightleftharpoons adp + dttp$                                | -Infinity | Infinity | 0.00               | 2.7.4.6   |
| NDPK5        | $[c] : atp + dgdg \rightleftharpoons adp + dgtp$                                | -Infinity | Infinity | 0.00               | 2.7.4.6   |
| NDPK6        | $[c] : atp + dudp \rightleftharpoons adp + dutp$                                | -Infinity | Infinity | 0.00               | 2.7.4.6   |
| NDPK7        | $[c] : atp + dcdp \rightleftharpoons adp + dctp$                                | -Infinity | Infinity | 0.00               | 2.7.4.6   |
| NDPK8        | $[c] : atp + dadp \rightleftharpoons adp + datp$                                | -Infinity | Infinity | 0.00               | 2.7.4.6   |
| NH4t         | $nh4[e] \rightleftharpoons nh4[c]$                                              | -Infinity | Infinity | 0.15               |           |
| NH4t3        | $k[c] + nh4[e] \rightarrow k[e] + nh4[c]$                                       | 0         | Infinity | 0.00               |           |

| Abbreviation | Equation                                                                                                                                                                                                     | LB        | UB       | Flux (mmol/gDCW/h) | EC Number |
|--------------|--------------------------------------------------------------------------------------------------------------------------------------------------------------------------------------------------------------|-----------|----------|--------------------|-----------|
| Nlabc        | $\text{atp}[c] + \text{h}_2\text{o}[c] + \text{ni}_2[\text{e}] \rightarrow \text{adp}[c] + \text{h}[c] + \text{ni}_2[c] + \text{pi}[c]$                                                                      | 0         | Infinity | 0.00               |           |
| NITr         | $[\text{c}] : (16) \text{atp} + (8) \text{fdred} + (16) \text{h}_2\text{o} + \text{n}_2 \rightleftharpoons (16) \text{adp} + (8) \text{fdox} + (6) \text{h} + \text{h}_2 + (2) \text{nh}_4 + (16) \text{pi}$ | -Infinity | Infinity | 0.00               | 1.18.6.1  |
| NMNATr       | $[\text{c}] : \text{atp} + \text{h} + \text{nmn} \rightleftharpoons \text{nad} + \text{ppi}$                                                                                                                 | -Infinity | Infinity | 0.00               | 2.7.7.1   |
| NNATr        | $[\text{c}] : \text{atp} + \text{h} + \text{nicrnt} \rightleftharpoons \text{dnad} + \text{ppi}$                                                                                                             | -Infinity | Infinity | 0.00               | 2.7.7.18  |
| NNDMBRT      | $[\text{c}] : \text{dmbzid} + \text{nicrnt} \rightarrow 5\text{prdmzbz} + \text{h} + \text{nac}$                                                                                                             | 0         | Infinity | 0.00               | 2.4.2.21  |
| NNDMBRT3     | $[\text{c}] : \text{ribflv} \rightarrow \text{dmbzid}$                                                                                                                                                       | 0         | Infinity | 0.00               |           |
| NNDPR        | $[\text{c}] : (2) \text{h} + \text{prpp} + \text{quln} \rightarrow \text{co}_2 + \text{nicrnt} + \text{ppi}$                                                                                                 | 0         | Infinity | 0.00               | 2.4.2.19  |
| NTPP1        | $[\text{c}] : \text{dgtp} + \text{h}_2\text{o} \rightarrow \text{dgmp} + \text{h} + \text{ppi}$                                                                                                              | 0         | Infinity | 0.00               |           |
| NTPP2        | $[\text{c}] : \text{gtp} + \text{h}_2\text{o} \rightarrow \text{gmp} + \text{h} + \text{ppi}$                                                                                                                | 0         | Infinity | 0.00               |           |
| NTPP3        | $[\text{c}] : \text{dctp} + \text{h}_2\text{o} \rightarrow \text{dcmp} + \text{h} + \text{ppi}$                                                                                                              | 0         | Infinity | 0.00               | 3.6.1.12  |
| NTPP4        | $[\text{c}] : \text{ctp} + \text{h}_2\text{o} \rightarrow \text{cmp} + \text{h} + \text{ppi}$                                                                                                                | 0         | Infinity | 0.00               |           |
| NTPP5        | $[\text{c}] : \text{datp} + \text{h}_2\text{o} \rightarrow \text{damp} + \text{h} + \text{ppi}$                                                                                                              | 0         | Infinity | 0.00               |           |
| NTPP6        | $[\text{c}] : \text{atp} + \text{h}_2\text{o} \rightarrow \text{amp} + \text{h} + \text{ppi}$                                                                                                                | 0         | Infinity | 0.00               |           |
| NTPP7        | $[\text{c}] : \text{dttp} + \text{h}_2\text{o} \rightarrow \text{dtmp} + \text{h} + \text{ppi}$                                                                                                              | 0         | Infinity | 0.00               |           |
| NTPP8        | $[\text{c}] : \text{h}_2\text{o} + \text{utp} \rightarrow \text{h} + \text{ppi} + \text{ump}$                                                                                                                | 0         | Infinity | 0.00               |           |
| NTPTP2       | $[\text{c}] : \text{gtp} + \text{h}_2\text{o} \rightarrow \text{gsn} + \text{pppi}$                                                                                                                          | 0         | Infinity | 0.00               | 3.1.5.1   |
| NTRIRx       | $[\text{c}] : (4) \text{h} + (3) \text{nadh} + \text{no}_2 \rightarrow \text{h}_2\text{o} + (3) \text{nad} + \text{nh}_4\text{oh}$                                                                           | 0         | Infinity | 0.00               | 1.7.1.4   |
| NTRIRy       | $[\text{c}] : (4) \text{h} + (3) \text{nadph} + \text{no}_2 \rightarrow \text{h}_2\text{o} + (3) \text{nadp} + \text{nh}_4\text{oh}$                                                                         | 0         | Infinity | 0.00               | 1.7.1.4   |
| OBFL         | $[\text{c}] : 2\text{obut} + \text{coa} \rightarrow \text{for} + \text{ppcoa}$                                                                                                                               | 0         | Infinity | 0.00               |           |
| OCBT         | $[\text{c}] : \text{cbp} + \text{orn-L} \rightleftharpoons \text{citr-L} + \text{h} + \text{pi}$                                                                                                             | -Infinity | Infinity | 0.00               | 2.1.3.3   |
| OCDMAT8      | $[\text{c}] : 2\text{tocdACP} + \text{h} + \text{nadh} \rightarrow \text{nad} + \text{ocdACP}$                                                                                                               | 0         | Infinity | 0.00               | 1.3.1.10  |
| OCMAT3       | $[\text{c}] : 2\text{toceACP} + \text{h} + \text{nadh} \rightarrow \text{nad} + \text{octACP}$                                                                                                               | 0         | Infinity | 0.00               | 1.3.1.10  |
| OCTT         | $[\text{c}] : \text{ipdp} + \text{octdp} \rightarrow \text{nondp} + \text{ppi}$                                                                                                                              | 0         | Infinity | 0.00               | 2.5.1.11  |
| OHPHM        | $[\text{c}] : 2\text{ohph} + \text{amet} \rightarrow 2\text{omph} + \text{ahcys} + \text{h}$                                                                                                                 | 0         | Infinity | 0.00               |           |
| OIVD1        | $[\text{c}] : 4\text{mop} + \text{coa} + \text{nad} \rightleftharpoons \text{co}_2 + \text{ivcoa} + \text{nadh}$                                                                                             | -Infinity | Infinity | 0.00               | 1.2.1.25  |
| OIVD2        | $[\text{c}] : 3\text{mob} + \text{coa} + \text{nad} \rightarrow \text{co}_2 + \text{ibcoa} + \text{nadh}$                                                                                                    | 0         | Infinity | 0.00               | 1.2.1.25  |
| OIVD3        | $[\text{c}] : 3\text{mop} + \text{coa} + \text{nad} \rightarrow 2\text{mbcoa} + \text{co}_2 + \text{nadh}$                                                                                                   | 0         | Infinity | 0.00               | 1.2.1.25  |
| OMBZLM       | $[\text{c}] : 2\text{ombzl} + \text{amet} \rightarrow 2\text{ommb} + \text{ahcys} + \text{h}$                                                                                                                | 0         | Infinity | 0.00               |           |
| OMCDC        | $[\text{c}] : 3\text{c4mop} + \text{h} \rightarrow 4\text{mop} + \text{co}_2$                                                                                                                                | 0         | Infinity | 0.01               |           |
| OMPDC        | $[\text{c}] : \text{h} + \text{orot5p} \rightarrow \text{co}_2 + \text{ump}$                                                                                                                                 | 0         | Infinity | 0.01               | 4.1.1.23  |
| OOR2r        | $[\text{c}] : \text{akg} + \text{coa} + (2) \text{fdox} \rightleftharpoons \text{co}_2 + (2) \text{fdred} + \text{h} + \text{succoa}$                                                                        | -Infinity | Infinity | -0.02              | 1.2.7.3   |
| ORNCD        | $[\text{c}] : \text{orn-L} \rightarrow \text{nh}_4 + \text{pro-L}$                                                                                                                                           | 0         | Infinity | 0.00               | 4.3.1.12  |
| ORNDC        | $[\text{c}] : \text{h} + \text{orn-L} \rightarrow \text{co}_2 + \text{ptrc}$                                                                                                                                 | 0         | Infinity | 0.00               | 4.1.1.17  |
| ORNTA        | $[\text{c}] : \text{akg} + \text{orn-L} \rightarrow \text{glu-L} + \text{glu5sa}$                                                                                                                            | 0         | Infinity | 0.00               | 2.6.1.13  |

| Abbreviation | Equation                                                             | LB        | UB       | Flux (mmol/gDCW/h) | EC Number |
|--------------|----------------------------------------------------------------------|-----------|----------|--------------------|-----------|
| ORNTAC       | [c] : acorn + glu-L <==> acglu + orn-L                               | -Infinity | Infinity | 0.01               | 2.3.1.35  |
| ORPT         | [c] : orot5p + ppi <==> orot + prpp                                  | -Infinity | Infinity | -0.01              | 2.4.2.10  |
| OXAD2        | [c] : h + oaa --> co2 + pyr                                          | 0         | Infinity | 0.00               | 4.1.1.3   |
| P5CR         | [c] : 1pyr5c + (2) h + nadph --> nadp + pro-L                        | 0         | Infinity | 0.00               | 1.5.1.2   |
| PACCOAL      | [c] : atp + coa + pheac --> amp + phaccoa + ppi                      | 0         | Infinity | 0.00               | 6.2.1.30  |
| PANTS        | [c] : ala-B + atp + pant-R --> amp + h + pnto-R + ppi                | 0         | Infinity | 0.00               | 6.3.2.1   |
| PC           | [c] : atp + hco3 + pyr --> adp + h + oaa + pi                        | 0         | Infinity | 0.04               | 6.4.1.1   |
| PDH          | [c] : coa + nad + pyr --> accoa + co2 + nadh                         | 0         | Infinity | 0.00               | 1.2.1.51  |
| PDX5PO       | [c] : o2 + pdx5p <==> h + h2o2 + pydx5p                              | -Infinity | Infinity | 0.00               | 1.4.3.5   |
| PDX5PS       | [c] : dxy15p + nad + phthr --> co2 + h + (2) h2o + nadh + pdx5p + pi | 0         | Infinity | 0.00               |           |
| PFK          | [c] : atp + f6p --> adp + fdp + h                                    | 0         | Infinity | 0.00               | 2.7.1.11  |
| PFK_2        | [c] : atp + tag6p-D --> adp + h + tagdp-D                            | 0         | Infinity | 0.00               | 2.7.1.11  |
| PFLi         | [c] : coa + pyr --> accoa + for                                      | 0         | Infinity | 0.00               |           |
| PGAMT        | [c] : gam1p <==> gam6p                                               | -Infinity | Infinity | 0.00               | 5.4.2.10  |
| PGCD         | [c] : 3pg + nad --> 3php + h + nadh                                  | 0         | Infinity | 0.00               | 1.1.1.95  |
| PGCDr        | [c] : 3pg + nad <==> 3php + h + nadh                                 | -Infinity | Infinity | 0.00               | 1.1.1.95  |
| PGI          | [c] : g6p <==> f6p                                                   | -Infinity | Infinity | 0.00               | 5.3.1.9   |
| PGK          | [c] : 13dpg + adp <==> 3pg + atp                                     | -Infinity | Infinity | -0.03              | 2.7.2.3   |
| PGM          | [c] : 3pg <==> 2pg                                                   | -Infinity | Infinity | -0.03              | 5.4.2.1   |
| PGMT         | [c] : g1p <==> g6p                                                   | -Infinity | Infinity | 0.00               | 5.4.2.2   |
| PGPPH        | [c] : h2o + pglyp --> pgly + pi                                      | 0         | Infinity | 0.00               | 3.1.3.27  |
| PHCYT        | [c] : 12dag3p + ctp + h --> cdpdag + ppi                             | 0         | Infinity | 0.00               | 2.7.7.41  |
| PHETA1       | [c] : akp + phe-L <==> glu-L + phpyr                                 | -Infinity | Infinity | 0.00               | 2.6.1.58  |
| PHETRS       | [c] : atp + phe-L + trnaphe --> amp + phetrna + ppi                  | 0         | Infinity | 0.00               | 6.1.1.20  |
| PIabc        | atp[c] + h2o[c] + pi[e] --> adp[c] + h[c] + (2) pi[c]                | 0         | Infinity | 0.00               |           |
| PIt6         | h[e] + pi[e] <==> h[c] + pi[c]                                       | -Infinity | Infinity | 0.03               |           |
| PMANM        | [c] : man1p <==> man6p                                               | -Infinity | Infinity | 0.00               | 5.4.2.8   |
| PMDPHT       | [c] : 5aprbu + h2o --> 4r5au + pi                                    | 0         | Infinity | 0.00               |           |
| PMPK         | [c] : 4ampm + atp --> 2mahmp + adp                                   | 0         | Infinity | 0.00               | 2.7.4.7   |
| PNTEH        | [c] : h2o + ptth --> cysam + pnto-R                                  | 0         | Infinity | 0.00               |           |
| PNTK         | [c] : atp + pnto-R --> 4ppan + adp + h                               | 0         | Infinity | 0.00               | 2.7.1.33  |
| POR          | [c] : coa + (2) fdox + pyr <==> accoa + co2 + (2) fdred + h          | -Infinity | Infinity | -0.15              | 1.2.7.1   |
| PPA          | [c] : h2o + ppi --> h + (2) pi                                       | 0         | Infinity | 0.00               | 3.6.1.1   |
| PPA_1        | h2o[c] + ppi[c] --> h[e] + (2) pi[c]                                 | 0         | Infinity | 0.26               | 3.6.1.1   |
| PPCDC        | [c] : 4ppcys + h --> co2 + pan4p                                     | 0         | Infinity | 0.00               | 4.1.1.36  |
| PPCOAC       | [c] : atp + hco3 + ppcoa --> adp + h + mmcoa-S + pi                  | 0         | Infinity | 0.00               | 6.4.1.3   |

| Abbreviation | Equation                                                              | LB        | UB       | Flux (mmol/gDCW/h) | EC Number |
|--------------|-----------------------------------------------------------------------|-----------|----------|--------------------|-----------|
| PPDK         | [c] : atp + pi + pyr --> amp + h + pep + ppi                          | 0         | Infinity | 0.04               | 2.7.9.1   |
| PPNCL        | [c] : 4ppan + ctp + cys-L --> 4ppcys + cdp + h + pi                   | 0         | Infinity | 0.00               | 6.3.2.5   |
| PPND         | [c] : nad + pphn --> 34hpp + co2 + nadh                               | 0         | Infinity | 0.00               | 1.3.1.12  |
| PPNDH        | [c] : h + pphn --> co2 + h2o + phpyr                                  | 0         | Infinity | 0.00               | 4.2.1.51  |
| PPS          | [c] : atp + h2o + pyr --> amp + (2) h + pep + pi                      | 0         | Infinity | 0.00               | 2.7.9.2   |
| PPTT         | [c] : ipdp + pendp --> hexdp + ppi                                    | 0         | Infinity | 0.00               | 2.5.1.33  |
| PRAGS        | [c] : atp + gly + pram --> adp + gar + h + pi                         | 0         | Infinity | 0.00               | 6.3.4.13  |
| PRAI         | [c] : pran <==> 2cpr5p                                                | -Infinity | Infinity | 0.00               | 5.3.1.24  |
| PRAIS        | [c] : atp + fpram --> adp + air + h + pi                              | 0         | Infinity | 0.00               | 6.3.3.1   |
| PRAMPC       | [c] : h + h2o + prbamp --> prfp                                       | 0         | Infinity | 0.00               | 3.5.4.19  |
| PRASCS       | [c] : 5aizc + asp-L + atp <==> 25aics + adp + h + pi                  | -Infinity | Infinity | 0.00               | 6.3.2.6   |
| PRATPP       | [c] : h2o + prbatp --> h + ppi + prbamp                               | 0         | Infinity | 0.00               | 3.6.1.31  |
| PRFGS        | [c] : atp + fgam + gln-L + h2o --> adp + fpram + glu-L + (2) h + pi   | 0         | Infinity | 0.00               | 6.3.5.3   |
| PRMICI       | [c] : prfp <==> prlp                                                  | -Infinity | Infinity | 0.00               | 5.3.1.16  |
| PROt6        | h[e] + pro-L[e] <==> h[c] + pro-L[c]                                  | -Infinity | Infinity | 0.00               |           |
| PROTRS       | [c] : atp + pro-L + trnapro --> amp + ppi + protrna                   | 0         | Infinity | 0.00               | 6.1.1.15  |
| PRPPS        | [c] : atp + r5p <==> amp + h + prpp                                   | -Infinity | Infinity | 0.01               | 2.7.6.1   |
| PSCVT        | [c] : pep + skm5p <==> 3psme + pi                                     | -Infinity | Infinity | 0.01               | 2.5.1.19  |
| PSERTr       | [c] : 3php + glu-L <==> agk + pser-L                                  | -Infinity | Infinity | 0.00               | 2.6.1.52  |
| PSP_L        | [c] : h2o + pser-L --> pi + ser-L                                     | 0         | Infinity | 0.00               | 3.1.3.3   |
| PSUDS        | [c] : r5p + ura --> h2o + psd5p                                       | 0         | Infinity | 0.00               | 4.2.1.70  |
| PTHPS        | [c] : ahdt --> 6pthp + pppi                                           | 0         | Infinity | 0.00               | 4.2.3.12  |
| PTPAT        | [c] : atp + h + pan4p <==> dpcoa + ppi                                | -Infinity | Infinity | 0.00               | 2.7.7.3   |
| PYAM5PO      | [c] : h2o + o2 + pyam5p --> h2o2 + nh4 + pydx5p                       | 0         | Infinity | 0.00               | 1.4.3.5   |
| PYK          | [c] : adp + h + pep --> atp + pyr                                     | 0         | Infinity | 0.00               | 2.7.1.40  |
| QULNS        | [c] : dhap + iasp --> (2) h2o + pi + quln                             | 0         | Infinity | 0.00               |           |
| RBFK         | [c] : atp + ribflv --> adp + fmh + h                                  | 0         | Infinity | 0.00               | 2.7.1.26  |
| RBFSa        | [c] : 4r5au + db4p --> dmlz + (2) h2o + pi                            | 0         | Infinity | 0.00               | 2.5.1.9   |
| RBFSb        | [c] : (2) dmlz --> 4r5au + ribflv                                     | 0         | Infinity | 0.00               | 2.5.1.9   |
| RBK          | [c] : atp + rib-D --> adp + h + r5p                                   | 0         | Infinity | 0.00               | 2.7.1.15  |
| RBZP         | [c] : 5prdmbz + h2o --> pi + rdmbzi                                   | 0         | Infinity | 0.00               |           |
| RDR1         | (8) fdred[c] + (4) h[c] + hcb[e] --> (4) cl[e] + dcb[e] + (8) fdox[c] | 0         | Infinity | 2.40               |           |
| RNDR1        | [c] : adp + trdrd --> dadp + h2o + trdox                              | 0         | Infinity | 0.00               | 1.17.4.1  |
| RNDR2        | [c] : gdp + trdrd --> dgdp + h2o + trdox                              | 0         | Infinity | 0.00               | 1.17.4.1  |
| RNDR3        | [c] : cdp + trdrd --> dcdp + h2o + trdox                              | 0         | Infinity | 0.00               | 1.17.4.1  |
| RNDR4        | [c] : trdrd + udp --> dudp + h2o + trdox                              | 0         | Infinity | 0.00               | 1.17.4.1  |

| Abbreviation | Equation                                                                                 | LB        | UB       | Flux (mmol/gDCW/h) | EC Number |
|--------------|------------------------------------------------------------------------------------------|-----------|----------|--------------------|-----------|
| RNTR1        | [c] : atp + trdrd --> datp + h2o + trdox                                                 | 0         | Infinity | 0.00               | 1.17.4.2  |
| RNTR2        | [c] : gtp + trdrd --> dgtp + h2o + trdox                                                 | 0         | Infinity | 0.00               | 1.17.4.2  |
| RNTR3        | [c] : ctp + trdrd --> dctp + h2o + trdox                                                 | 0         | Infinity | 0.00               | 1.17.4.2  |
| RNTR4        | [c] : trdrd + utp --> dutp + h2o + trdox                                                 | 0         | Infinity | 0.00               | 1.17.4.2  |
| RPE          | [c] : ru5p-D <==> xu5p-D                                                                 | -Infinity | Infinity | -0.01              | 5.1.3.1   |
| RPI          | [c] : r5p <==> ru5p-D                                                                    | -Infinity | Infinity | -0.01              | 5.3.1.6   |
| S7PI         | [c] : s7p <==> gmh7p                                                                     | -Infinity | Infinity | 0.00               |           |
| SACCD2       | [c] : Lsacchrp + h2o + nad <==> akg + h + lys-L + nadh                                   | -Infinity | Infinity | 0.00               | 1.5.1.7   |
| SADT2        | [c] : atp + gtp + h2o + so4 --> aps + gdp + pi + ppi                                     | 0         | Infinity | 0.00               | 2.7.7.4   |
| SDPDS        | [c] : h2o + sl26da --> 26dap-LL + succ                                                   | 0         | Infinity | 0.00               | 3.5.1.18  |
| SDPTA        | [c] : akg + sl26da <==> glu-L + sl2a6o                                                   | -Infinity | Infinity | 0.00               | 2.6.1.17  |
| SERAT        | [c] : accoa + ser-L <==> acser + coa                                                     | -Infinity | Infinity | 0.00               | 2.3.1.30  |
| SERD_Lr      | [c] : ser-L <==> nh4 + pyr                                                               | -Infinity | Infinity | -0.02              | 4.3.1.17  |
| SERTRS       | [c] : atp + ser-L + trnaser --> amp + ppi + sertrna                                      | 0         | Infinity | 0.00               | 6.1.1.11  |
| SHK3D        | [c] : 3dhsk + h + nadph <==> nadp + skm                                                  | -Infinity | Infinity | 0.01               | 1.1.1.25  |
| SHKK         | [c] : atp + skm --> adp + h + skm5p                                                      | 0         | Infinity | 0.01               | 2.7.1.71  |
| SOD          | [c] : (2) h + (2) o2 --> h2o2 + o2                                                       | 0         | Infinity | 0.00               | 1.15.1.1  |
| SUCOAS       | [c] : atp + coa + succ <==> adp + pi + succoa                                            | -Infinity | Infinity | 0.02               | 6.2.1.5   |
| SULabc       | atp[c] + h2o[c] + so4[e] --> adp[c] + h[c] + pi[c] + so4[c]                              | 0         | Infinity | 0.00               |           |
| SULR         | [c] : (3) h2o + h2s + (3) nadp <==> (4) h + (3) nadph + so3                              | -Infinity | Infinity | 0.00               | 1.8.1.2   |
| TAL          | [c] : g3p + s7p <==> e4p + f6p                                                           | -Infinity | Infinity | 0.00               | 2.2.1.2   |
| TDMAT6       | [c] : myrsACP + nad <==> h + nadh + tdeACP                                               | -Infinity | Infinity | 0.00               | 1.3.1.10  |
| TGBPA        | [c] : tagdp-D <==> dhap + g3p                                                            | -Infinity | Infinity | 0.00               | 4.1.2.40  |
| THDPS        | [c] : h2o + succoa + thdp --> coa + sl2a6o                                               | 0         | Infinity | 0.00               | 2.3.1.117 |
| THRA         | [c] : thr-L <==> acald + gly                                                             | -Infinity | Infinity | 0.00               | 4.1.2.5   |
| THRD_L       | [c] : thr-L --> 2obut + nh4                                                              | 0         | Infinity | 0.00               |           |
| THRLAD       | [c] : thr-LA --> acald + gly                                                             | 0         | Infinity | 0.00               |           |
| THRPD        | [c] : h + thrp --> 1ap2olp + co2                                                         | 0         | Infinity | 0.00               |           |
| THRS         | [c] : h2o + phom --> pi + thr-L                                                          | 0         | Infinity | 0.00               | 4.2.3.1   |
| THRTRS       | [c] : atp + thr-L + trnathr --> amp + ppi + thrtRNA                                      | 0         | Infinity | 0.00               | 6.1.1.3   |
| THZPSN       | [c] : atp + cys-L + dxyl5p + tyr-L --> 4hba + 4mpetz + ala-L + amp + co2 + h + h2o + ppi | 0         | Infinity | 0.00               |           |
| TKT1         | [c] : r5p + xu5p-D <==> g3p + s7p                                                        | -Infinity | Infinity | 0.00               | 2.2.1.1   |
| TKT2         | [c] : e4p + xu5p-D <==> f6p + g3p                                                        | -Infinity | Infinity | -0.01              | 2.2.1.1   |
| TMDK1        | [c] : atp + thymd --> adp + dtmp + h                                                     | 0         | Infinity | 0.00               | 2.7.1.21  |
| TMDS         | [c] : dump + mlthf --> dhf + dtmp                                                        | 0         | Infinity | 0.00               | 2.1.1.45  |
| TMPKr        | [c] : atp + thmmp <==> adp + thmpp                                                       | -Infinity | Infinity | 0.00               | 2.7.4.16  |

| Abbreviation  | Equation                                                        | LB        | UB       | Flux (mmol/gDCW/h) | EC Number |
|---------------|-----------------------------------------------------------------|-----------|----------|--------------------|-----------|
| TMPPP         | [c] : 2mahmp + 4mpetz + h --> ppi + thmmp                       | 0         | Infinity | 0.00               | 2.5.1.3   |
| TPI           | [c] : dhap <==> g3p                                             | -Infinity | Infinity | -0.01              | 5.3.1.1   |
| TRDR          | [c] : h + nadph + trdox --> nadp + trdrd                        | 0         | Infinity | 0.01               | 1.8.1.9   |
| TRPS1         | [c] : 3ig3p + ser-L --> g3p + h2o + trp-L                       | 0         | Infinity | 0.00               | 4.2.1.20  |
| TRPTRS        | [c] : atp + trnatrp + trp-L --> amp + ppi + trptrna             | 0         | Infinity | 0.00               | 6.1.1.2   |
| TSULabc       | atp[c] + h2o[c] + tsul[e] --> adp[c] + h[c] + pi[c] + tsul[c]   | 0         | Infinity | 0.00               |           |
| TYRTA         | [c] : akgl + tyr-L <==> 34hpp + glu-L                           | -Infinity | Infinity | 0.00               | 2.6.1.5   |
| TYRTRS        | [c] : atp + trnatyr + tyr-L --> amp + ppi + tyrtrna             | 0         | Infinity | 0.00               | 6.1.1.1   |
| UAGCVT        | [c] : pep + uacgam --> pi + uaccg                               | 0         | Infinity | 0.00               | 2.5.1.7   |
| UAGDP         | [c] : acgam1p + h + utp --> ppi + uacgam                        | 0         | Infinity | 0.00               | 2.7.7.23  |
| UAPGR         | [c] : h + nadph + uaccg --> nadp + uamr                         | 0         | Infinity | 0.00               | 1.1.1.158 |
| UDPDP5        | [c] : decdp + ipdp --> ppi + udcpdp                             | 0         | Infinity | 0.00               | 2.5.1.31  |
| UDPG4E        | [c] : udpg <==> udpgal                                          | -Infinity | Infinity | 0.00               | 5.1.3.2   |
| UMPK          | [c] : atp + ump <==> adp + udp                                  | -Infinity | Infinity | 0.01               |           |
| UPP3MT        | [c] : (2) amet + uppg3 --> (2) ahcys + (2) h + shcl             | 0         | Infinity | 0.00               | 2.1.1.107 |
| UPP3S         | [c] : hmbil --> h2o + uppg3                                     | 0         | Infinity | 0.00               | 4.2.1.75  |
| UPPRT         | [c] : prpp + ura --> ppi + ump                                  | 0         | Infinity | 0.00               | 2.4.2.9   |
| URIDK1        | [c] : atp + ump --> adp + udp                                   | 0         | Infinity | 0.00               |           |
| URIDK2        | [c] : atp + dump --> adp + dudp                                 | 0         | Infinity | 0.00               |           |
| VALabc        | atp[c] + h2o[c] + val-L[e] --> adp[c] + h[c] + pi[c] + val-L[c] | 0         | Infinity | 0.00               |           |
| VALTA         | [c] : akgl + val-L <==> 3mob + glu-L                            | -Infinity | Infinity | -0.01              | 2.6.1.42  |
| VALTRS        | [c] : atp + trnaval + val-L --> amp + ppi + valtrna             | 0         | Infinity | 0.00               | 6.1.1.9   |
| X00005        | [c] : coa + gcald --> accoa + h2o                               | 0         | Infinity | 0.00               |           |
| XTPASE        | [c] : h2o + xtp --> h + ppi + xmp                               | 0         | Infinity | 0.00               |           |
| XYLI2i        | [c] : fru --> glc-D                                             | 0         | Infinity | 0.00               | 5.3.1.5   |
| ZN2abc2       | atp[c] + h2o[c] + zn2[e] --> adp[c] + h[c] + pi[c] + zn2[c]     | 0         | Infinity | 0.00               |           |
| EX_ac(e)      | [e] : ac <==>                                                   | -5        | 0        | -0.18              |           |
| EX_antim(e)   | [e] : antim <==>                                                | 0         | 0        | 0.00               |           |
| EX_arsna(e)   | [e] : arsna <==>                                                | 0         | 0        | 0.00               |           |
| EX_arsni2(e)  | [e] : arsni2 <==>                                               | 0         | 0        | 0.00               |           |
| EX_cbl1(e)    | [e] : cbl1 <==>                                                 | -Infinity | Infinity | 0.00               |           |
| EX_cit(e)     | [e] : cit <==>                                                  | 0         | 0        | 0.00               |           |
| EX_cl(e)      | [e] : cl <==>                                                   | 0         | Infinity | 9.61               |           |
| EX_co2(e)     | [e] : co2 <==>                                                  | -Infinity | Infinity | -0.17              |           |
| EX_cobalt2(e) | [e] : cobalt2 <==>                                              | 0         | 0        | 0.00               |           |
| EX_cu2(e)     | [e] : cu2 <==>                                                  | 0         | 0        | 0.00               |           |
| EX_dcb(e)     | [e] : dcb <==>                                                  | 0         | Infinity | 2.40               |           |

| Abbreviation | Equation         | LB        | UB       | Flux (mmol/gDCW/h) | EC Number |
|--------------|------------------|-----------|----------|--------------------|-----------|
| EX_etl(e)    | [e] : etl <==>   | 0         | Infinity | 0.00               |           |
| EX_fe2(e)    | [e] : fe2 <==>   | 0         | 0        | 0.00               |           |
| EX_gln-L(e)  | [e] : gln-L <==> | 0         | 0        | 0.00               |           |
| EX_glyb(e)   | [e] : glyb <==>  | 0         | 0        | 0.00               |           |
| EX_h(e)      | [e] : h <==>     | -Infinity | Infinity | 9.55               |           |
| EX_h2(e)     | [e] : h2 <==>    | -10       | 0        | -10.00             |           |
| EX_h2o(e)    | [e] : h2o <==>   | -Infinity | Infinity | 0.51               |           |
| EX_hcb(e)    | [e] : hcb <==>   | -Infinity | 0        | -2.40              |           |
| EX_ile-L(e)  | [e] : ile-L <==> | 0         | 0        | 0.00               |           |
| EX_k(e)      | [e] : k <==>     | 0         | 0        | 0.00               |           |
| EX_leu-L(e)  | [e] : leu-L <==> | 0         | 0        | 0.00               |           |
| EX_mg2(e)    | [e] : mg2 <==>   | 0         | 0        | 0.00               |           |
| EX_mn2(e)    | [e] : mn2 <==>   | 0         | 0        | 0.00               |           |
| EX_mobd(e)   | [e] : mobd <==>  | 0         | 0        | 0.00               |           |
| EX_n2(e)     | [e] : n2 <==>    | 0         | 0        | 0.00               |           |
| EX_nh4(e)    | [e] : nh4 <==>   | -Infinity | Infinity | -0.15              |           |
| EX_ni2(e)    | [e] : ni2 <==>   | 0         | 0        | 0.00               |           |
| EX_pce(e)    | [e] : pce <==>   | -Infinity | 0        | 0.00               |           |
| EX_pi(e)     | [e] : pi <==>    | -Infinity | Infinity | -0.03              |           |
| EX_pro-L(e)  | [e] : pro-L <==> | 0         | 0        | 0.00               |           |
| EX_so4(e)    | [e] : so4 <==>   | -Infinity | Infinity | 0.00               |           |
| EX_tsul(e)   | [e] : tsul <==>  | 0         | 0        | 0.00               |           |
| EX_val-L(e)  | [e] : val-L <==> | 0         | 0        | 0.00               |           |
| EX_zn2(e)    | [e] : zn2 <==>   | 0         | 0        | 0.00               |           |
