# Supplementary material for: Characterizing the Metabolism of Dehalococcoides with a Constraint-Based Model
Source: PLoS Comput Biol. 2010 Aug 19;6(8):e1000887. doi: 10.1371/journal.pcbi.1000887 (PMC2930330; doi:10.1371/journal.pcbi.1000887)
Supplement: Text S2 — This file contains the tables of detailed macromolecular composition of a gram of Dehalococcoides cell, experimental values of various pan-model parameters and the detailed procedure to calculate those parameters, as well as supplemental text regarding energy conservation process of Dehalococcoides. In addition, all the supplemental figures are included at the end of this document. (0.31 MB PDF) [file pcbi.1000887.s003.pdf]

## **Supplementary Information - 2**

### **Characterizing the Metabolism of *Dehalococcoides* with a Constraint-based Model**

**M. Ahsanul Islam, Elizabeth A. Edwards, Radhakrishnan Mahadevan\***

Department of Chemical Engineering and Applied Chemistry, University of Toronto  
Toronto, ON M5S 3E5, Canada

**\*Corresponding author**

Email addresses:

ahsan.islam@utoronto.ca

elizabeth.edwards@utoronto.ca

krishna.mahadevan@utoronto.ca

**Supplementary information - 2:** This file contains the tables of detailed macromolecular composition of a gram of *Dehalococcoides* cell, experimental values of various pan-model parameters and the detailed procedure to calculate those parameters, as well as supplemental text regarding energy conservation process of *Dehalococcoides*. In addition, all the supplemental figures are included at the end of this document.

## Table of Contents

|                                                                                                                                                                                                                            |    |
|----------------------------------------------------------------------------------------------------------------------------------------------------------------------------------------------------------------------------|----|
| Table 18. Overall Macromolecular Composition of a <i>Dehalococcoides</i> Cell                                                                                                                                              | 2  |
| Table 19. Protein Composition of 1 Gram of <i>Dehalococcoides</i> Cell                                                                                                                                                     | 2  |
| Table 20. DNA Composition of 1 Gram of <i>Dehalococcoides</i> Cell                                                                                                                                                         | 3  |
| Table 21. RNA Composition of 1 Gram of <i>Dehalococcoides</i> Cell                                                                                                                                                         | 3  |
| Table 22. Lipid Composition of 1 Gram of <i>Dehalococcoides</i> Cell                                                                                                                                                       | 3  |
| Table 23. Composition of Cofactors and Other Soluble Pools of 1 Gram of <i>Dehalococcoides</i> Cell                                                                                                                        | 4  |
| Table 24. Experimental Growth Yields of Various <i>Dehalococcoides</i> Cultures                                                                                                                                            | 4  |
| Table 25. Experimental Growth Rates of Various <i>Dehalococcoides</i> Cultures                                                                                                                                             | 7  |
| Table 26. Experimental Decay Rates of Different Anaerobes                                                                                                                                                                  | 7  |
| Table 27. Energy Cost for Processing and Polymerization of Macromolecules (GAM) of a Typical Bacterial Cell                                                                                                                | 8  |
| Table 28. Standard Gibbs Free Energies for Different Dechlorination Reactions                                                                                                                                              | 8  |
| Table 29. Theoretical ATP/e <sup>-</sup> and H <sup>+</sup> /e <sup>-</sup> Ratios of Reductive Dechlorination by <i>Dehalococcoides</i>                                                                                   | 9  |
| Table 30. Experimental Values of Corrinoid Content of Various Anaerobes                                                                                                                                                    | 10 |
| Table 31. Growth Rate Simulations with and without the Citrate Synthase (CS) Reaction in the TCA-cycle                                                                                                                     | 10 |
| Supplementary Text                                                                                                                                                                                                         | 11 |
| <i>Dehalococcoides</i> Biomass Synthesis Reaction                                                                                                                                                                          | 11 |
| Calculation of <i>Dehalococcoides</i> Cell Composition                                                                                                                                                                     | 11 |
| Calculation of NGAM and GAM Parameters of <i>iAI549</i>                                                                                                                                                                    | 13 |
| Energy Conservation Process of <i>Dehalococcoides</i>                                                                                                                                                                      | 13 |
| Calculation of Theoretical Maximum Energy Transfer Efficiency (ATP/e <sup>-</sup> ) and Proton Translocation Stoichiometry (H <sup>+</sup> /e <sup>-</sup> ratio) of <i>Dehalococcoides</i> Electron Transport Chain (ETC) | 14 |
| Supplementary Figures                                                                                                                                                                                                      | 16 |
| Figure 1. Steps involved to identify <i>Dehalococcoides</i> pan-genome                                                                                                                                                     | 16 |
| Figure 2. Steps involved to identify <i>Dehalococcoides</i> core-genome                                                                                                                                                    | 17 |
| Figure 3. Steps involved to identify <i>Dehalococcoides</i> unique-genome                                                                                                                                                  | 18 |
| Figure 4. Steps involved to identify <i>Dehalococcoides</i> dispensable-genome                                                                                                                                             | 19 |
| Figure 5. Reconstructed Wood-Ljungdahl pathway for <i>Dehalococcoides</i> .                                                                                                                                                | 20 |
| Figure 6. Tentative scheme for the electron transport chain of <i>Dehalococcoides</i>                                                                                                                                      | 21 |
| Figure 7. Distribution of metabolic genes in different subsystems of <i>iAI549</i>                                                                                                                                         | 22 |
| Figure 8. Distribution of gene-associated model reactions in different subsystems of <i>iAI549</i>                                                                                                                         | 23 |
| References                                                                                                                                                                                                                 | 24 |

**Table 18. Overall Macromolecular Composition of a *Dehalococcoides* Cell<sup>a</sup>**

|                        |      |
|------------------------|------|
| Protein                | 63%  |
| RNA                    | 16%  |
| DNA                    | 12%  |
| Lipid                  | 5%   |
| Carbohydrate           | 1%   |
| Soluble pools and ions | 3%   |
| Total                  | 100% |

<sup>a</sup>Assumption based on *iAF692 (Methanosarcina barkeri)* model [1]. The DNA content is higher than *M. barkeri* because *Dehalococcoides* are disc shaped and smaller in size than *M. barkeri* [2].

**Table 19. Protein Composition of 1 Gram of *Dehalococcoides* Cell<sup>a</sup>**

| Amino acids       | Content (mol%) | Content (mmol/g DCW) |
|-------------------|----------------|----------------------|
| L – Alanine       | 9.58           | 0.5588               |
| L – Arginine      | 5.52           | 0.3220               |
| L – Asparagine    | 4.5            | 0.2625               |
| L – Aspartate     | 4.5            | 0.2625               |
| L – Cysteine      | 1.72           | 0.1003               |
| L – Glutamine     | 4.91           | 0.2864               |
| L – Glutamate     | 4.91           | 0.2864               |
| Glycine           | 11.45          | 0.6679               |
| L – Histidine     | 1.78           | 0.1038               |
| L – Isoleucine    | 5.45           | 0.3179               |
| L – Leucine       | 8.45           | 0.4929               |
| L – Lysine        | 6.4            | 0.3733               |
| L – Methionine    | 2.88           | 0.1680               |
| L – Phenylalanine | 3.47           | 0.2024               |
| L – Proline       | 4.15           | 0.2421               |
| L – Serine        | 4.05           | 0.2363               |
| L – Threonine     | 4.73           | 0.2759               |
| L – Tryptophan    | 1.07           | 0.0624               |
| L – Tyrosine      | 2.59           | 0.1511               |
| L – Valine        | 7.89           | 0.4603               |

<sup>a</sup> [21], [24]

**Table 20. DNA Composition of 1 Gram of *Dehalococcoides* Cell<sup>a</sup>**

| <b>dNTPs</b> | <b>Content (mol%)</b> | <b>Content (mmol/g DCW)</b> |
|--------------|-----------------------|-----------------------------|
| dATP         | 95.5                  | 0.0955                      |
| dGTP         | 84.7                  | 0.0847                      |
| dCTP         | 84.7                  | 0.0847                      |
| dTTP         | 95.5                  | 0.0955                      |

<sup>a</sup><http://img.jgi.doe.gov/cgi-bin/pub/main.cgi>

**Table 21. RNA Composition of 1 Gram of *Dehalococcoides* Cell<sup>a</sup>**

| <b>rNTPs</b> | <b>Content (mol%)</b> | <b>Content (mmol/g DCW)</b> |
|--------------|-----------------------|-----------------------------|
| ATP          | 26.19                 | 0.1289                      |
| GTP          | 32.22                 | 0.1586                      |
| CTP          | 20.00                 | 0.1063                      |
| UTP          | 21.59                 | 0.0985                      |

<sup>a</sup>Elizabeth A. Edwards (personal communication)

**Table 22. Lipid Composition of 1 Gram of *Dehalococcoides* Cell<sup>a</sup>**

| <b>Lipids</b>                           | <b>Content (mol%)</b> | <b>Content (mmol/g DCW)</b> |
|-----------------------------------------|-----------------------|-----------------------------|
| Dodecanoic acid (C12:0)                 | 0.91                  | 0.0019                      |
| Tetradecanoic acid (C14:0)              | 7.44                  | 0.0154                      |
| Hexadecanoic acid (C16:0)               | 41.85                 | 0.0865                      |
| Octadecanoic acid (C18:0)               | 18.19                 | 0.0376                      |
| Eicosanoic acid (C20:0)                 | 0.49                  | 0.0010                      |
| Oleic acid (18:1w9c)                    | 0.35                  | 0.0007                      |
| 10-R-Methylhexadecanoic acid (10Me16:0) | 22.8                  | 0.0471                      |
| Dodecanoic acid (C12:0)                 | 0.91                  | 0.0019                      |

<sup>a</sup>[25]

**Table 23. Composition of Cofactors and Other Soluble Pools of 1 Gram of *Dehalococcoides* Cell<sup>a</sup>**

| Components               | Content (mmol/g DCW) |
|--------------------------|----------------------|
| Putrescine               | 0.0262               |
| Homospermidine           | 0.0047               |
| Acetyl-CoA               | 0.0001               |
| CoA                      | 0.000006             |
| NAD                      | 0.0022               |
| NADH                     | 0.0001               |
| NADP                     | 0.0001               |
| NADPH                    | 0.0004               |
| Succinyl-CoA             | 0.000003             |
| AMP                      | 0.0010               |
| ADP                      | 0.002                |
| ATP                      | 0.004                |
| 5,6,7,8-tetrahydrofolate | 0.0001               |
| Adenosylcobalamin        | 0.0047               |
| Glycogen                 | 0.0154               |

<sup>a</sup>[1]**Table 24. Experimental Growth Yields of Various *Dehalococcoides* Cultures**

| <i>Dehalococcoides</i> culture | Electron acceptor <sup>a</sup> | Yield (g protein/mol Cl) <sup>b</sup> | Yield (copy/ $\mu$ mol ethene) | Yield (copy/ $\mu$ mol Cl) | Yield (gDCW/mol Cl) <sup>c</sup> | Yield (gDCW/eeq) | Reference |
|--------------------------------|--------------------------------|---------------------------------------|--------------------------------|----------------------------|----------------------------------|------------------|-----------|
| <b>Pure cultures</b>           |                                |                                       |                                |                            |                                  |                  |           |
| Strain CBDB1                   | HCB                            | <b>2.1</b>                            | -                              | $9.13 \times 10^7$         | 1.11                             | 0.55             | [3]       |
| Strain CBDB1                   | PeCB                           | <b>2.9</b>                            | -                              | $1.26 \times 10^8$         | 1.53                             | 0.77             | [3]       |
| Strain CBDB1                   | 2,3-DCP                        | <b>1.73</b>                           | -                              | $7.52 \times 10^7$         | 0.91                             | 0.46             | [4]       |
| Strain 195                     | PCE                            | <b>4.8</b>                            | -                              | $2.9 \times 10^8$          | 2.53                             | 1.27             | [5]       |

| <i>Dehalococcoides</i> culture      | Electron acceptor <sup>a</sup> | Yield (g protein/mol Cl) <sup>b</sup> | Yield (copy/ $\mu$ mol ethene) | Yield (copy/ $\mu$ mol Cl)   | Yield (gDCW/mol Cl) <sup>c</sup> | Yield (gDCW/eeq)   | Reference |
|-------------------------------------|--------------------------------|---------------------------------------|--------------------------------|------------------------------|----------------------------------|--------------------|-----------|
| Strain 195                          | 2,3-DCP                        | -                                     | -                              | <b>8.30 x 10<sup>7</sup></b> | 1.01                             | 0.50               | [4]       |
| Strain BAV1                         | VC                             | -                                     | -                              | <b>6.30 x 10<sup>7</sup></b> | 0.76                             | 0.38               | [6]       |
| Strain FL2                          | TCE                            | -                                     | -                              | <b>7.80 x 10<sup>7</sup></b> | 0.95                             | 0.47               | [7]       |
| Strain FL2                          | cis-DCE                        | -                                     | -                              | <b>8.40 x 10<sup>7</sup></b> | 1.02                             | 0.51               | [7]       |
| Strain FL2                          | trans-DCE                      | -                                     | -                              | <b>8.10 x 10<sup>7</sup></b> | 0.98                             | 0.49               | [7]       |
| Strain GT                           | VC                             | -                                     | -                              | <b>2.50 x 10<sup>8</sup></b> | 3.03                             | 1.52               | [8]       |
| Strain GT                           | TCE                            | -                                     | <b>9.30 x 10<sup>8</sup></b>   | 3.10 x 10 <sup>8</sup>       | 3.76                             | 1.88               | [8]       |
| Average ( $\pm$ standard deviation) |                                |                                       |                                |                              | 1.38 ( $\pm$ 1.03)               | 0.69 ( $\pm$ 0.51) |           |
| <b>Mixed cultures</b>               |                                |                                       |                                |                              |                                  |                    |           |
| VS enrichment                       | VC                             | -                                     | -                              | <b>5.20 x 10<sup>8</sup></b> | 6.31                             | 3.16               | [9]       |
| KB1/VC enrichment                   | VC                             | -                                     | -                              | <b>5.60 x 10<sup>8</sup></b> | 6.80                             | 3.40               | [10]      |
| KB1/VC enrichment                   | TCE                            | -                                     | -                              | <b>3.60 x 10<sup>8</sup></b> | 4.37                             | 2.19               | [10]      |
| ANAS enrichment                     | VC                             | -                                     | -                              | <b>1.30 x 10<sup>7</sup></b> | 0.16                             | 0.08               | [11]      |
| ANAS enrichment                     | cis-DCE                        | -                                     | -                              | <b>1.2 x 10<sup>7</sup></b>  | 0.15                             | 0.07               | [11]      |

| <i>Dehalococcoides</i> culture                   | Electron acceptor <sup>a</sup> | Yield (g protein/mol Cl) <sup>b</sup> | Yield (copy/ $\mu$ mol ethene) | Yield (copy/ $\mu$ mol Cl)   | Yield (gDCW/mol Cl) <sup>c</sup> | Yield (gDCW/eeq)   | Reference |
|--------------------------------------------------|--------------------------------|---------------------------------------|--------------------------------|------------------------------|----------------------------------|--------------------|-----------|
| ANAS enrichment                                  | TCE                            | -                                     | -                              | <b>1.4 x 10<sup>7</sup></b>  | 0.17                             | 0.08               | [11]      |
| JN culture                                       | PCB                            | -                                     | -                              | <b>9.25 x 10<sup>8</sup></b> | 11.23                            | 5.61               | [12]      |
| KB1/TCE enrichment                               | 1,2-DCA                        | -                                     | <b>3.20 x 10<sup>8</sup></b>   | 1.60 x 10 <sup>8</sup>       | 1.94                             | 1.94               | [2]       |
| KB1/TCE enrichment                               | VC                             | -                                     | <b>2.90 x 10<sup>8</sup></b>   | 2.90 x 10 <sup>8</sup>       | 3.52                             | 1.76               | [2]       |
| KB1/TCE enrichment                               | cis-DCE                        | -                                     | <b>3.50 x 10<sup>8</sup></b>   | 1.75 x 10 <sup>8</sup>       | 2.12                             | 1.06               | [2]       |
| Average ( $\pm$ standard deviation) <sup>e</sup> |                                |                                       |                                |                              | 4.18 ( $\pm$ 2.05)               | 2.25 ( $\pm$ 0.88) |           |

<sup>a</sup>Short forms for electron acceptors are: HCB, Hexachlorobenzene; PeCB, Pentachlorobenzene; PCB, Polychlorinated biphenyls; 2,3-DCP, 2,3-Dichlorophenol; PCE, Tetrachloroethene; VC, Vinyl chloride; TCE, Trichloroethene; cis-DCE, cis-Dichloroethene; trans-DCE, trans-Dichloroethene; 1,2-DCA, 1,2-Dichloroethane.

<sup>b</sup>A conversion factor of  $2.3 \times 10^{-14}$  g protein cell<sup>-1</sup> is used to convert the numbers in g protein to copy [4].

<sup>c</sup>Copy numbers are converted to gram dry cell weight (gDCW) by assuming cylindrical shape, 0.5  $\mu$ m diameter, 0.2  $\mu$ m thickness and 70% water content of a *Dehalococcoides* cell as well as 1 copy of the 16S rRNA gene per genome or per cell.

<sup>d</sup>Bold numbers are yield values cited in the literature.

<sup>e</sup>Average and standard deviation of mixed cultures are calculated without including ANAS and JN cultures' yield since those are outliers. ANAS yields are based on long term experiments where dechlorination and growth may be uncoupled [11]. JN yield is likely to be inaccurate due to difficulties in measuring PCB concentration.

**Table 25. Experimental Growth Rates of Various *Dehalococcoides* Cultures**

| <i>Dehalococcoides</i> culture      | Electron acceptor <sup>a</sup> | Growth rate (d <sup>-1</sup> ) | Growth rate (h <sup>-1</sup> ) | Reference |
|-------------------------------------|--------------------------------|--------------------------------|--------------------------------|-----------|
| <b>Pure cultures</b>                |                                |                                |                                |           |
| Strain CBDB1                        | 2,3-DCP                        | 0.41                           | 0.017                          | [4]       |
| Strain 195                          | PCE                            | 1.26                           | 0.053 <sup>b</sup>             | [13]      |
| Strain BAV1                         | VC                             | 0.32                           | 0.013                          | [6]       |
| Strain GT                           | VC                             | 0.35                           | 0.014                          | [8]       |
| Strain FL2                          | VC                             | 0.29                           | 0.012                          | [7]       |
| Average ( $\pm$ standard deviation) |                                |                                | 0.014 ( $\pm$ 0.002)           |           |
| <b>Mixed cultures</b>               |                                |                                |                                |           |
| VS enrichment                       | TCE                            | 0.35                           | 0.015                          | [14]      |
| VS enrichment                       | cis-DCE                        | 0.46                           | 0.019                          | [14]      |
| VS enrichment                       | VC                             | 0.49                           | 0.020                          | [14]      |
| KB1/VC enrichment                   | TCE                            | 0.33                           | 0.014                          | [14]      |
| KB1/VC enrichment                   | cis-DCE                        | 0.44                           | 0.018                          | [14]      |
| KB1/VC enrichment                   | VC                             | 0.42                           | 0.018                          | [14]      |
| Average ( $\pm$ standard deviation) |                                |                                | 0.017 ( $\pm$ 0.003)           |           |

<sup>a</sup>Short forms for electron acceptors are: 2,3-DCP, 2,3-Dichlorophenol; VC, Vinyl chloride; PCE, Tetrachloroethene; TCE, Trichloroethene; cis-DCE, cis-Dichloroethene.

<sup>b</sup>Growth rate calculation was not substantiated; hence, not used in calculating average.

**Table 26. Experimental Decay Rates of Different Anaerobes**

| Organism                                             | Decay rate (d <sup>-1</sup> ) | Reference |
|------------------------------------------------------|-------------------------------|-----------|
| <i>Dehalococcoides</i> sp. strain VS (during growth) | 0.05                          | [9]       |
| <i>Dehalococcoides</i> sp. strain VS (no growth)     | 0.09                          | [9]       |

| Organism                         | Decay rate (d <sup>-1</sup> ) | Reference |
|----------------------------------|-------------------------------|-----------|
| <i>Methanobacterium bryantii</i> | 0.088                         | [13]      |
| Typical for anaerobes            | 0.02                          | [15]      |

**Table 27. Energy Cost for Processing and Polymerization of Macromolecules (GAM) of a Typical Bacterial Cell<sup>a</sup>**

| Process                 | mmol/g DCW | μmol ATP/μmol | mmol ATP/g DCW |
|-------------------------|------------|---------------|----------------|
| Protein                 |            |               |                |
| Activation              | 5.8333     | 4.0000        | 23.3332        |
| mRNA synthesis          |            | 0.2000        | 1.1667         |
| Proofreading            |            | 0.1000        | 0.5833         |
| Assembly/modification   |            | 0.0060        | 0.1399         |
| RNA                     |            |               |                |
| Discarding segments     | 0.4923     | 0.3800        | 0.1871         |
| Modification            |            | 0.0200        | 0.0098         |
| DNA                     |            |               |                |
| Unwinding helix         | 0.3604     | 1.0000        | 0.3604         |
| Proofreading            |            | 0.3600        | 0.1297         |
| Discontinuous synthesis |            | 0.0060        | 0.0022         |
| Negative supercoiling   |            | 0.0050        | 0.0018         |
| Methylation             |            | 0.0010        | 0.0004         |
| Total cost              |            |               | 25.9145        |

<sup>a</sup>[21]

**Table 28. Standard Gibbs Free Energies for Different Dechlorination Reactions**

| Electron donor | Electron acceptor | Product         | Reaction $\Delta G_0'$ (kJ/mol) | Reference |
|----------------|-------------------|-----------------|---------------------------------|-----------|
| Hydrogen       | Tetrachloroethene | Trichloroethene | -175.31                         | [15,16]   |

| Electron donor        | Electron acceptor  | Product            | Reaction $\Delta G_0'$ (kJ/mol) | Reference |
|-----------------------|--------------------|--------------------|---------------------------------|-----------|
| Hydrogen              | Trichloroethene    | Dichloroethene     | -166.31                         | [15,16]   |
| Hydrogen              | Dichloroethene     | Chloroethene       | -145.71                         | [15,16]   |
| Hydrogen              | Chloroethene       | Ethene             | -151.35                         | [15,16]   |
| Hydrogen              | Hexachlorobenzene  | Pentachlorobenzene | -171.40                         | [17]      |
| Hydrogen              | Pentachlorobenzene | Tetrachlorobenzene | -164.07                         | [17]      |
| Hydrogen              | Tetrachlorobenzene | Trichlorobenzene   | -164.3                          | [17]      |
| Hydrogen              | Trichlorobenzene   | Dichlorobenzene    | -152.77                         | [17]      |
| Average $\Delta G_0'$ |                    |                    | <b>-161.40</b>                  |           |

**Table 29. Theoretical ATP/e<sup>-</sup> and H<sup>+</sup>/e<sup>-</sup> Ratios of Reductive Dechlorination by *Dehalococcoides***

| Average $\Delta G_0'$ (kJ/mol) | ATP/e <sup>-</sup> ratio (maximum) | Proton translocation/mole ATP | H <sup>+</sup> /e <sup>-</sup> ratio |         | (Assumed/Maximum) X 100 (Energy transfer efficiency) | ATP/e <sup>-</sup> (Assumed) |
|--------------------------------|------------------------------------|-------------------------------|--------------------------------------|---------|------------------------------------------------------|------------------------------|
|                                |                                    |                               | Maximum                              | Assumed |                                                      |                              |
| 161.40                         | 1.64                               | 3                             | 4.92                                 | 5       | 100                                                  | 1.64                         |
|                                |                                    |                               |                                      | 4       | 80                                                   | 1.30                         |
|                                |                                    |                               |                                      | 3       | 60                                                   | 1.00                         |
|                                |                                    |                               |                                      | 2       | 40                                                   | 0.66                         |
|                                |                                    |                               |                                      | 1       | 20                                                   | 0.33                         |

**Table 30. Experimental Values of Corrinoid Content of Various Anaerobes**

| Organism                                               | Corrinoid content (literature values) | Corrinoid content (mmol/gDCW) | <i>Dehalococcoides</i> yield prediction by <i>iAI549</i> during corrinoid salvage from the medium (gDCW/eq) | <i>Dehalococcoides</i> yield prediction by <i>iAI549</i> during <i>de novo</i> corrinoid synthesis (gDCW/eq) | Reference  |
|--------------------------------------------------------|---------------------------------------|-------------------------------|-------------------------------------------------------------------------------------------------------------|--------------------------------------------------------------------------------------------------------------|------------|
| <i>Clostridium cochlearium</i>                         | 30 nmol/g wet mass                    | 0.00015                       | 0.713                                                                                                       | 0.713                                                                                                        | [18]       |
| <i>Acetobacterium woodii</i>                           | 650 nmol/g dry mass                   | 0.00065                       | 0.713                                                                                                       | 0.713                                                                                                        | [19]       |
| <i>Clostridium formicoaceticum</i>                     | 950 nmol/g dry mass                   | 0.00095                       | 0.713                                                                                                       | 0.713                                                                                                        | [19]       |
| <i>Sporomusa ovata</i>                                 | 3100 nmol/g dry mass                  | 0.0031                        | 0.713                                                                                                       | 0.710                                                                                                        | [19]       |
| <i>Methanosarcina barkeri</i> (used in <i>iAI549</i> ) | -                                     | 0.0047                        | 0.713                                                                                                       | 0.709                                                                                                        | [20]       |
| 10X <i>Methanosarcina barkeri</i>                      | -                                     | 0.047                         | 0.707                                                                                                       | 0.676                                                                                                        | Assumption |

**Table 31. Growth Rate Simulations with and without the Citrate Synthase (CS) Reaction in the TCA-cycle**

| Exchange reactions                 | Flux values without the CS reaction (mmol/gDCW.h) | Flux values with the CS reaction (mmol/gDCW.h) |
|------------------------------------|---------------------------------------------------|------------------------------------------------|
| Acetate exchange, EX_ac(e)         | 0.1820                                            | 0.1943                                         |
| Cobalamin exchange, EX_cbl1(e)     | 0.0001                                            | 0.0001                                         |
| Carbon dioxide exchange, EX_co2(e) | 0.1741                                            | 0.1383                                         |
| Hydrogen exchange, EX_h2(e)        | 10.0000                                           | 10.0000                                        |
| Chloride exchange,                 | 9.6067                                            | 9.6793                                         |

| Exchange reactions | Flux values without the CS reaction (mmol/gDCW.h) | Flux values with the CS reaction (mmol/gDCW.h) |
|--------------------|---------------------------------------------------|------------------------------------------------|
| EX_Cl(e)           |                                                   |                                                |
| Parameters         | Without the CS reaction                           | With the CS reaction                           |
| Growth rate        | 0.014 h <sup>-1</sup>                             | 0.0137 h <sup>-1</sup>                         |
| Growth yield       | 0.72 gDCW/eq                                      | 0.71 gDCW/eq                                   |

## Supplementary Text

### *Dehalococcoides* Biomass Synthesis Reaction

The detail macromolecular composition of one (1) gram of *Dehalococcoides* cell, presented in Tables S18-S23, as well as the GAM (61 mmol ATP. gDCW<sup>-1</sup>) has been included in *iAI549* as a biomass synthesis reaction: BIO\_DHC\_DM\_61.

Considering a basis of 1 gram dry cell weight, the biomass synthesis equation is defined as:

0.0001 mmol Acetyl-CoA + 0.0047 mmol Adenosylcobalamin + 0.5588 mmol L-alanine + 0.001 mmol AMP + 0.3320 mmol L-arginine + 0.2625 mmol L-asparagine + 0.2625 mmol L-aspartate + 61 mmol ATP + 0.000006 mmol CoenzymeA + 0.1063 mmol CTP + 0.1003 mmol L-cysteine + 0.0955 mmol dATP + 0.0847 mmol dCTP + 0.0019 mmol Dodecanoic acid + 0.0847 mmol dGTP + 0.0955 mmol dTTP + 0.0471 mmol 10-R-Methylhexadecanoic acid + 0.2684 mmol L-glutamine + 0.2684 mmol L-glutamate + 0.6679 mmol Glycine + 0.0154 mmol Glycogen + 0.1586 mmol GTP + 61 mmol H<sub>2</sub>O + 0.0865 mmol Hexadecanoic acid + 0.1038 mmol L-histidine + 0.0047 mmol Homospermidine + 0.001 mmol Eicosanoic acid + 0.3179 mmol L-isoleucine + 0.4929 mmol L-leucine + 0.3733 mmol L-lysine + 0.1680 mmol L-methionine + 0.0022 mmol NAD + 0.0001 mmol NADH + 0.0001 mmol NADP + 0.0004 mmol NADPH + 0.0376 mmol Octadecanoic acid + 0.0007 mmol Oleic acid + 0.0347 mmol L-phenylalanine + 0.0415 mmol L-proline + 0.0262 mmol Putrescine + 0.0405 mmol L-serine + 0.000003 mmol Succinyl-CoA + 0.0001 mmol 5,6,7,8-tetrahydrofolate + 0.2759 mmol L-threonine + 0.0624 mmol L-tryptophan + 0.0154 mmol Tetradecanoic acid + 0.1511 mmol L-tyrosine + 0.0985 mmol UTP + 0.4603 mmol L-valine ----> 61 mmol ADP + 61 mmol H<sup>+</sup> + 61 mmol Inorganic Phosphate

### Calculation of *Dehalococcoides* Cell Composition

The shape of *Dehalococcoides* cell is reported to be cylindrical [2].

Diameter of one *Dehalococcoides* cell = 0.5 µm [2]

Thickness of one *Dehalococcoides* cell = 0.2 µm

Hence, the volume of one *Dehalococcoides* cell =  $\pi r^2 h = \pi \left(\frac{D}{2}\right)^2 h = \pi \left(\frac{0.5}{2}\right)^2 0.2$

$$= 0.0393 \mu\text{m}^3$$

Assume, cell density is equal to the density of water = 1.03 g/ml.

$$\begin{aligned}\text{Therefore, mass of one } Dehalococcoides \text{ cell} &= 1.03 \text{ g/ml} \times 3.93 \times 10^{-2} \mu\text{m}^3 \times 10^{-12} \text{ ml}/\mu\text{m}^3 \\ &= 4.05 \times 10^{-14} \text{ g}\end{aligned}$$

Typically, a bacterial cell has 70% water [21]

$$\begin{aligned}\text{Hence, dry mass of one } Dehalococcoides \text{ cell} &= 4.05 \times 10^{-14} \times 0.3 \text{ g} \\ &= 1.21 \times 10^{-14} \text{ g}\end{aligned}$$

Length of *Dehalococcoides* DNA (roughly) =  $1.4 \times 10^6$  base pairs (bp) [22]

Assume, the average molecular mass of a nucleotide or 1 bp = 666 g/mol

Hence, the molar mass of a *Dehalococcoides* genome =  $1.4 \times 10^6 \times 666$  g/mol

Since, 1 mole of nucleotide =  $6.023 \times 10^{23}$  molecules of nucleotide

Therefore,

$$\begin{aligned}\text{The mass of 1 molecule of } Dehalococcoides \text{ nucleotide (or genome)} \\ &= (1.4 \times 10^6 \times 666) / (6.023 \times 10^{23}) \text{ g} \\ &= 1.55 \times 10^{-15} \text{ g}\end{aligned}$$

$$\text{So, the percentage of DNA in 1 gram dry cell mass} = \left( \frac{1.55 \times 10^{-15}}{1.21 \times 10^{-14}} \right) \times 100\% = 12.75\%$$

We know, the amount of RNA in a 50 ml culture = 50  $\mu\text{g}$  (Elizabeth A. Edwards, personal communication)

So, 1 ml of culture contains 1  $\mu\text{g}$  of RNA.

Also, 1 ml of similar culture contains  $1 \times 10^7 \sim 5 \times 10^8$  copies of *Dehalococcoides* cells (Elizabeth A. Edwards, personal communication)

Assuming that 1 ml of culture has  $5 \times 10^8$  copies of *Dehalococcoides* cells.

$$\text{Hence, the dry mass of } 5 \times 10^8 \text{ cells} = 5 \times 10^8 \times 1.21 \times 10^{-14} \text{ g} = 6.05 \times 10^{-6} \text{ g}$$

So,  $6.05 \times 10^{-6}$  g of cells has 1  $\times 10^{-6}$  g of RNA

Therefore,

$$\text{The percentage of RNA in 1 gram dry cell mass} = \left( \frac{1 \times 10^{-6}}{6.05 \times 10^{-6}} \right) \times 100 = 16.53\%$$

Since, the experimental data for estimating the percentage contents of other components of a *Dehalococcoides* cell were not available, the corresponding estimates from the published *Methanosarcina barkeri* model [1] that included protein, lipid, carbohydrate, and soluble pools and ions were used in this model.

In order to determine the amount of individual component of the macromolecules of a *Dehalococcoides* cell, physiological data from various published models of different

microorganisms [1,21,23,24] have been used. The contents of different fatty acids were calculated from White et al. [25].

### Calculation of NGAM and GAM Parameters of *iAI549*

Non-growth associated (NGAM) and growth associated maintenance (GAM) parameters for *Dehalococcoides* were estimated using the published data from [3,4,6,7,8,9,14,21,26] and the equation from [27,28,29], as well as simulations in SimPheny™.

The non-growth associated ATP maintenance is given by

$$m = \frac{b}{Y_G}$$

where,  $b$  = specific maintenance rate or decay rate ( $d^{-1}$ )

$Y_G$  = True growth yield or yield without maintenance (g DCW/eq)

Assuming  $Y_G = Y$  = Observed growth yield for *Dehalococcoides* bacteria,

$$m = \frac{b}{Y}$$

Using pure culture growth yield,  $Y = 0.69$  gDCW/eq (Table 24) and  $b = 0.09 d^{-1}$  (Table 26), the calculated NGAM for *Dehalococcoides* bacteria is

$$m = \frac{0.09 \times 1 \times 1000}{0.69 \times 24 \times 3} = 1.8 \text{ mmol ATP/g DCW.h}$$

### Energy Conservation Process of *Dehalococcoides*

*Dehalococcoides* strains respire through a membrane-bound electron transport chain (ETC) [30,31,32], which is incompletely defined. In addition to RDase and hydrogenase ( $H_2ase$ ) enzymes, the ETC of *Dehalococcoides* requires an *in vivo* electron carrier to mediate electron transport between  $H_2ase$  and RDase. The reductive dechlorination reaction requires an *in vivo* electron donor of redox potential ( $E_0'$ )  $\leq -360$  mV [30,32] similar to other dechlorinating bacteria [33,34,35]. The cob(II)alamin of corrinoid cofactor in the RDase enzyme is reduced to cob(I)alamin during the reductive dechlorination reaction; hence, necessitating a low-potential donor because the redox potential ( $E_0'$ ) of Co(II)/Co(I) couple is between -500 and -600 mV [33,34,36]. While quinones, such as menaquinone or ubiquinone could act as electron carriers in anaerobes [37,38,39], experimental evidence suggests this is not the case in *Dehalococcoides* [3,32]. Moreover, the half reaction potentials for quinones (Menaquinone ox/red  $E_0' = -70$  mV, Ubiquinone ox/red  $E_0' = +113$  mV; [40]) are not compatible with RDases that require a donor of  $E_0' \leq -360$  mV.

Therefore, we hypothesize that ferredoxin could be a low-potential electron donor for the RDase of *Dehalococcoides* because it is the most electronegative electron carrier yet found in the bacterial ETCs [41,42]. Various redox potentials had been reported for bacterial ferredoxins,

which included -417 mV at pH 7.55 for *Clostridium pasteurianum* [43], -398 and -367 mV in the range of pH 6.13 to 7.41 for *C. pasteurianum* [40,44], -445 mV at pH 7 for *Dehalospirillum multivorans* [35], -453 mV at pH 8 for *Thermotoga maritima* [45]. While these experimental data illustrate the differences in ferredoxin potential across microbes, it also supports their putative role as a low-potential electron carrier in the *Dehalococcoides* ETC. Furthermore, there was strong genomic evidence that the sequences of *rdh* genes contained two iron-sulfur cluster binding motifs, which are the characteristic motifs for bacterial ferredoxins [46]. So far, the genomes of *Dehalococcoides* have 6 putative ferredoxin-encoding genes (Tables 3-7 in Text S1), but no gene was identified for a b-type cytochrome. Miller and colleagues [35] described a mechanism for the ETC of *D. multivorans* involving both H<sub>2</sub>ase and RDase enzymes where they propose the “reverse electron transport”, and the requirement of both a low-potential and a high-potential electron carrier for the ETC. Recently, Thauer et al. [47] suggested that the energy conservation process of methanogens without cytochromes (a system similar to *Dehalococcoides*) used a flavin-based “electron bifurcation” system where an endergonic reaction was driven by the energy from an exergonic reaction that took place simultaneously. A similar bifurcation mechanism was also proposed for the trimeric [Fe]-only H<sub>2</sub>ase of *T. maritima* [48]. Based on the literature and considering the lack of information on the *Dehalococcoides* ETC, we propose the following simplified mechanism of energy conservation for its ETC (Figure 6).

We assumed that the H<sub>2</sub>ase of *Dehalococcoides* reduced ferredoxin in a similar process as described for *M. barkeri* [47,49,50,51]. Subsequently, the reduced ferredoxin was assumed to transfer electrons to terminal electron acceptors, such as chloroethenes or chlorobenzenes (RX) via cob(II)alamin where cob(II)alamin was reduced to cob(I)alamin [33,34], and RX was reduced to lower chlorinated compounds or ethenes (RH). Alternatively, the endergonic reduction of ferredoxin with H<sub>2</sub> could be coupled to the exergonic reduction of RX with reduced ferredoxin where the later reaction was catalyzed by RDase in a similar manner as the electron bifurcation scheme. This might be possible because a corrinoid protein, like a flavo-protein, could also be a site for electron bifurcation (R. K. Thauer, personal communication). In either case, we assume that the uptake of two protons (2H<sup>+</sup>) from the cytoplasm occurs during the transfer of 2e<sup>-</sup> from the donor H<sub>2</sub> to the acceptor RX; thus, resulting in a net proton translocation stoichiometry of 1 H<sup>+</sup> per e<sup>-</sup> (Figure 6).

### Calculation of Theoretical Maximum Energy Transfer Efficiency (ATP/e<sup>-</sup>) and Proton Translocation Stoichiometry (H<sup>+</sup>/e<sup>-</sup> ratio) of *Dehalococcoides* Electron Transport Chain (ETC)

The theoretical maximum ATP/e<sup>-</sup> ratio, ( $\eta_{ATP}/\eta_e$ )<sub>max</sub> can be determined from the following equation [37]:

$$\left( \frac{\eta_{ATP}}{\eta_e} \right)_{\max} = \frac{\Delta E_0' F}{\Delta G_p'} \quad (1)$$

where, F is the Faraday constant (96,500 J/mol .V),  $\Delta E_0'$  is the difference in standard redox potential between the electron donor and acceptor, and  $\Delta G_p'$  is the free energy of phosphorylation reaction at pH 7 and physiological condition.

Since,  $\Delta G_0' = -nF\Delta E_0'$

$$\text{Therefore, } \left( \eta_{ATP} / \eta_e \right)_{\max} = \Delta G_0' / n\Delta G_p' \quad (2)$$

Where n is the number of electrons transferred in the reaction

$\Delta G_p'$  at physiological conditions can be calculated from the free energy of the phosphorylation reaction at standard conditions and pH 7 ( $\Delta G_{0,p}'$ ) using the following equation:

$$\Delta G_p' = \Delta G_{0,p}' + RT \ln \left( \frac{[ATP]}{[ADP][P_i]} \right) \quad (3)$$

where,  $\Delta G_{0,p}' = 32$  kJ/mol [40], R is the universal gas constant having a value of 8.314 J/mol.K and T is the absolute temperature, 298.15 K at 25 °C.

Assuming that the concentrations of ATP and ADP are equal and that the concentration of  $P_i$  is 1 mM, then the calculated value of  $\Delta G_p'$  using equation (3) is 49.12 kJ/mol.

The average standard free energy for dechlorination was found to be  $\Delta G_0'$  of -161.40 kJ/mol (Table 28).

Therefore, theoretical maximum ATP/ $e^-$  using equation (2) is:

$$\left( \eta_{ATP} / \eta_e \right)_{\max} = \frac{161.40}{2 \times 49.12} = 1.64$$

Assuming the number of  $H^+$  translocated across the cell membrane during the phosphorylation of ADP is 3 [52], we obtain the theoretical maximum  $H^+/e^-$  of dechlorination process is 4.92 (Table 29) which means, the  $H^+/e^-$  should be either 5 or 4.

Since the ATP/ $e^-$  value (0.33) corresponding to 1  $H^+/e^-$  (Table 29) was found to be in agreement with the experimental ATP/ $e^-$  value of 0.6 mol ATP/mol  $Cl^-$  [35,53,54], the proton translocation stoichiometry of *Dehalococcoides* ETC was chosen as 1  $H^+/e^-$ .

## Supplementary Figures

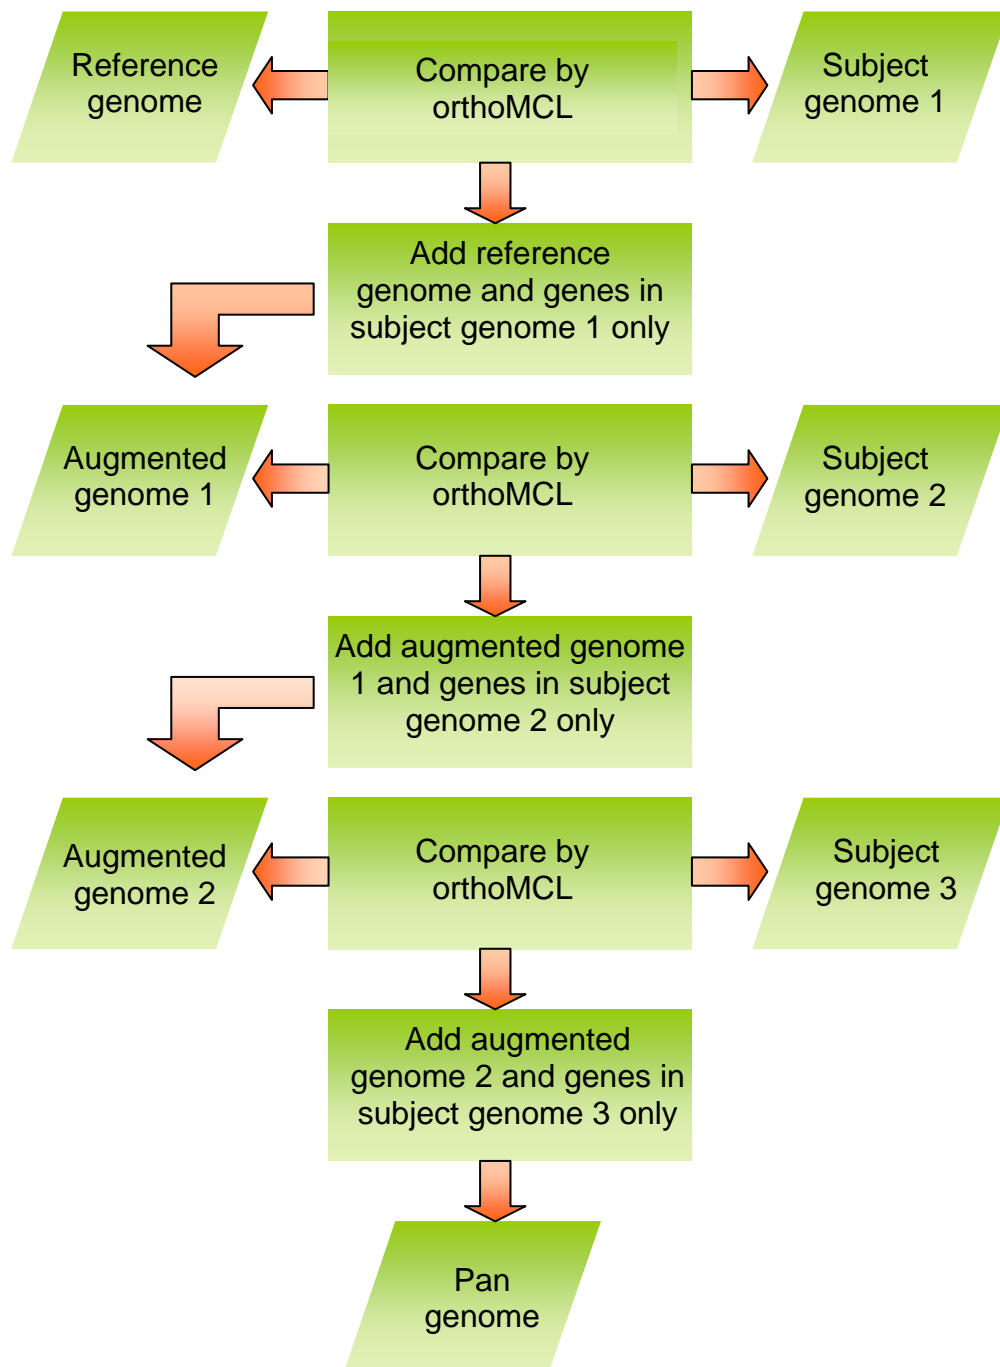

Figure 1. Steps involved to identify *Dehalococcoides* pan-genome

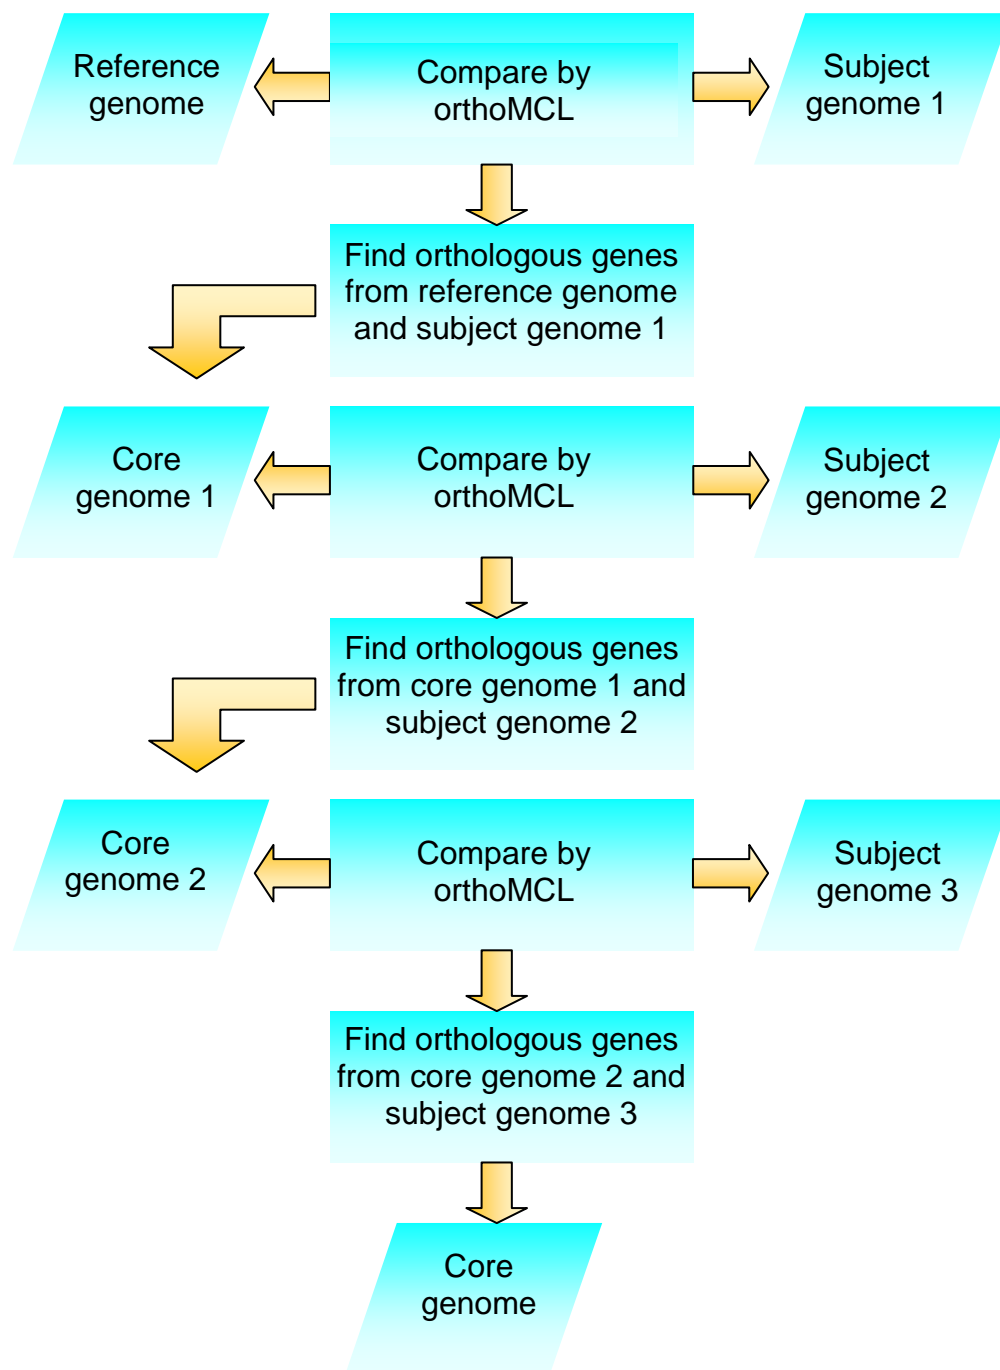

Figure 2. Steps involved to identify *Dehalococcoides* core-genome

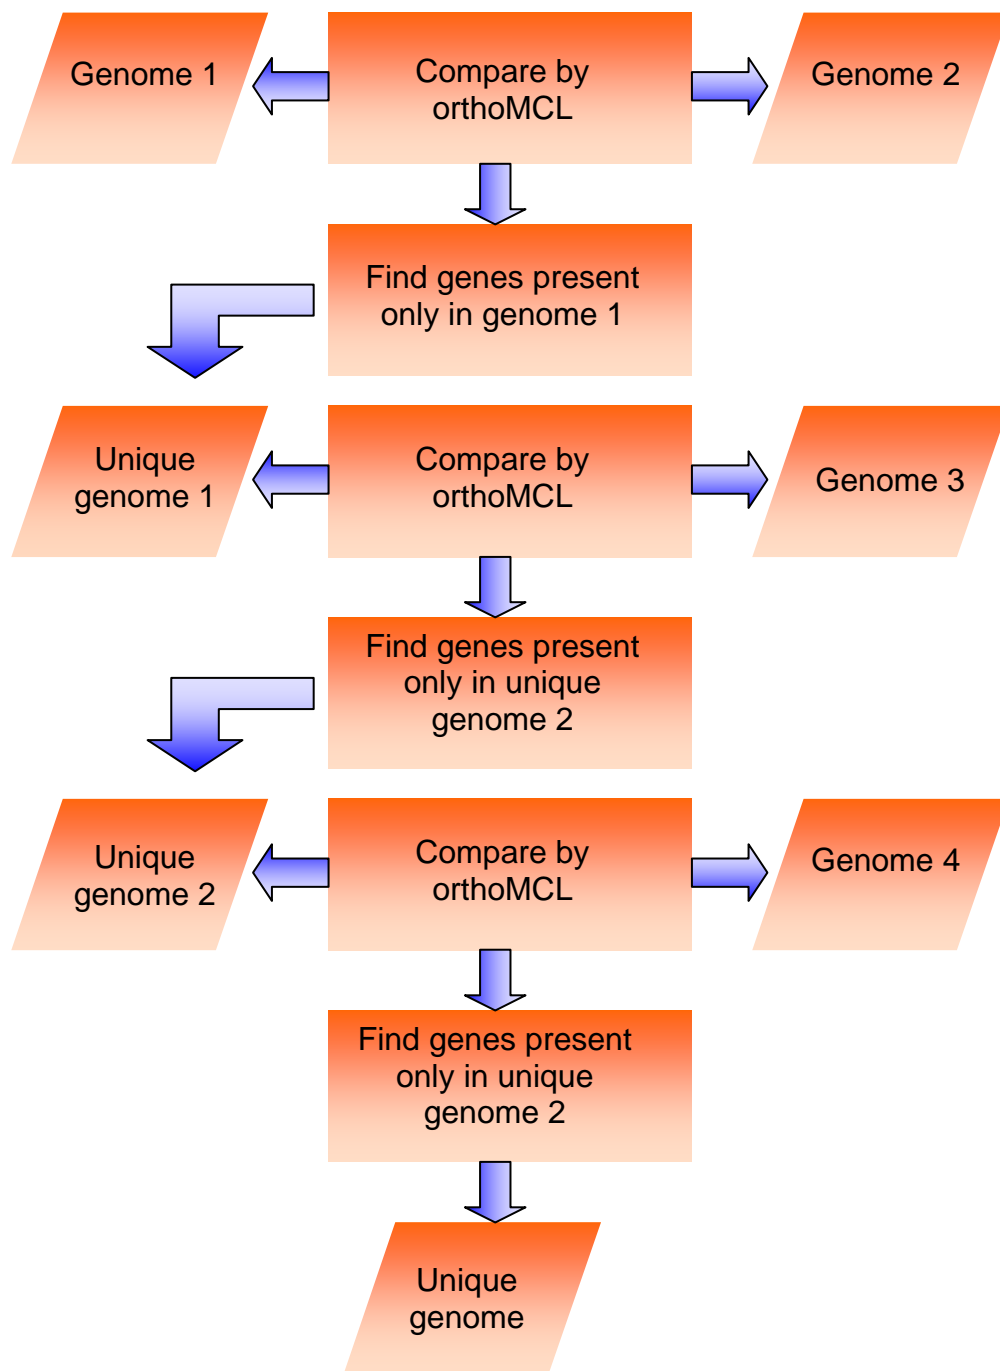

Figure 3. Steps involved to identify *Dehalococcoides* unique-genome

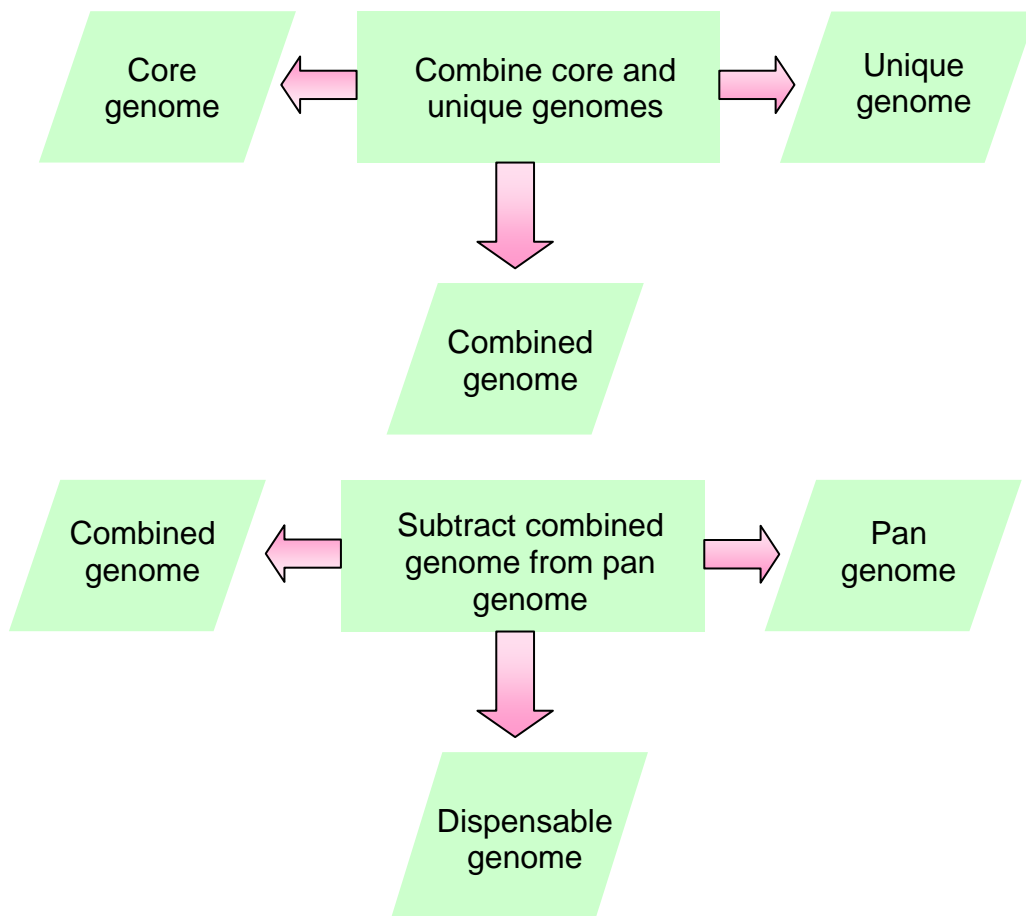

Figure 4. Steps involved to identify *Dehalococcoides* dispensable-genome

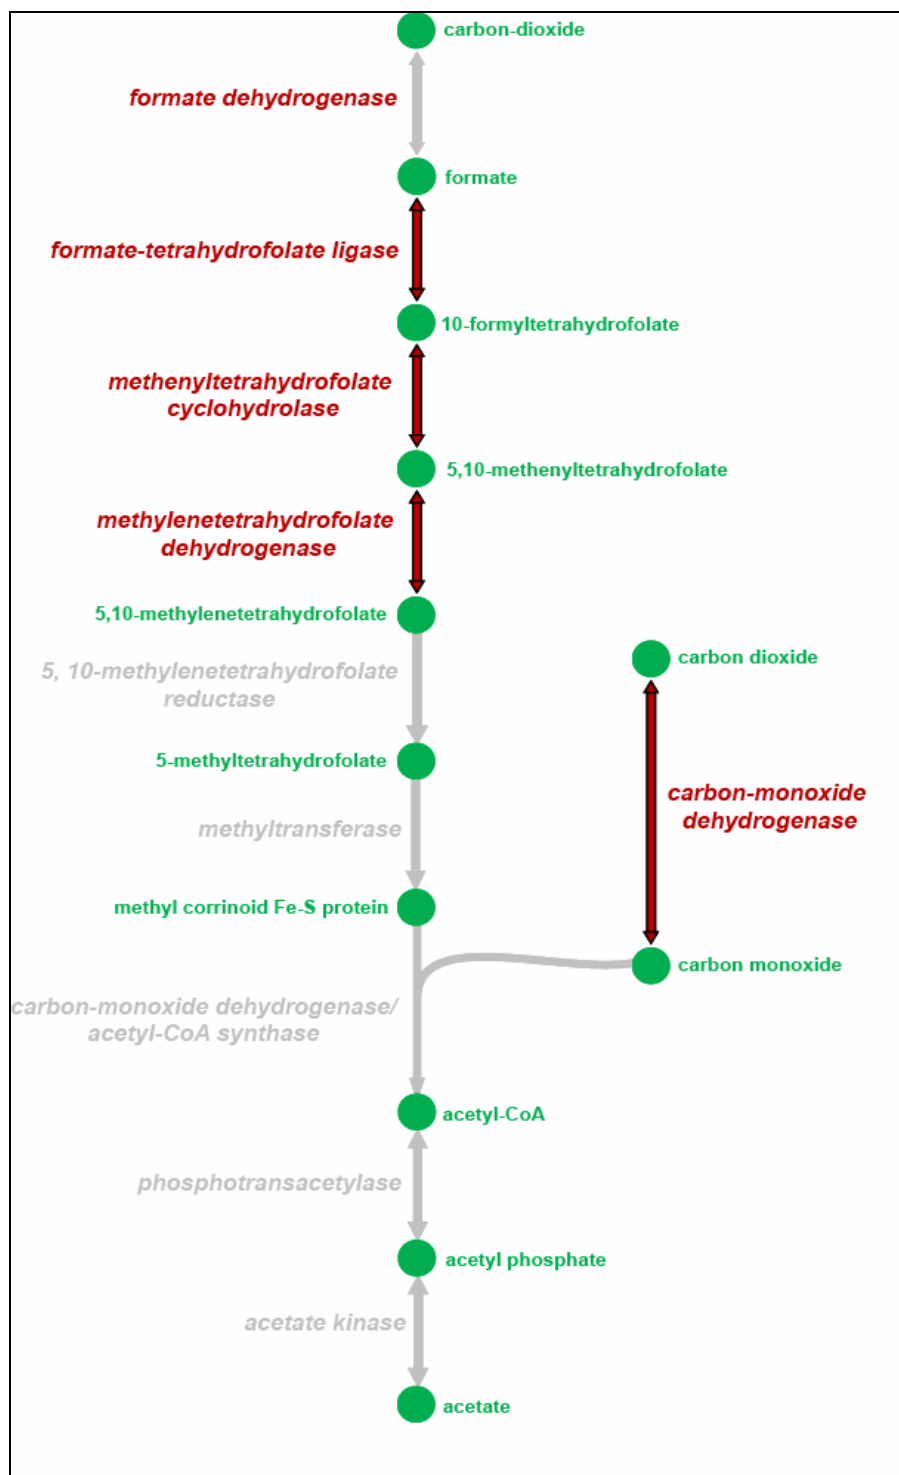

Figure 5. Reconstructed Wood-Ljungdahl pathway for *Dehalococcoides*. Grey lines indicate missing pathways and red lines indicate existing pathways, the genes of which are identified in the genomes of *Dehalococcoides* during the reconstruction of *iAI549*. The arrows are denoting the directionality of the reactions. Due to the missing enzymes, *Dehalococcoides* seem not to be able to fix carbon or CO<sub>2</sub> by the Wood-Ljungdahl pathway which is also supported by the result from Tang et al [55].

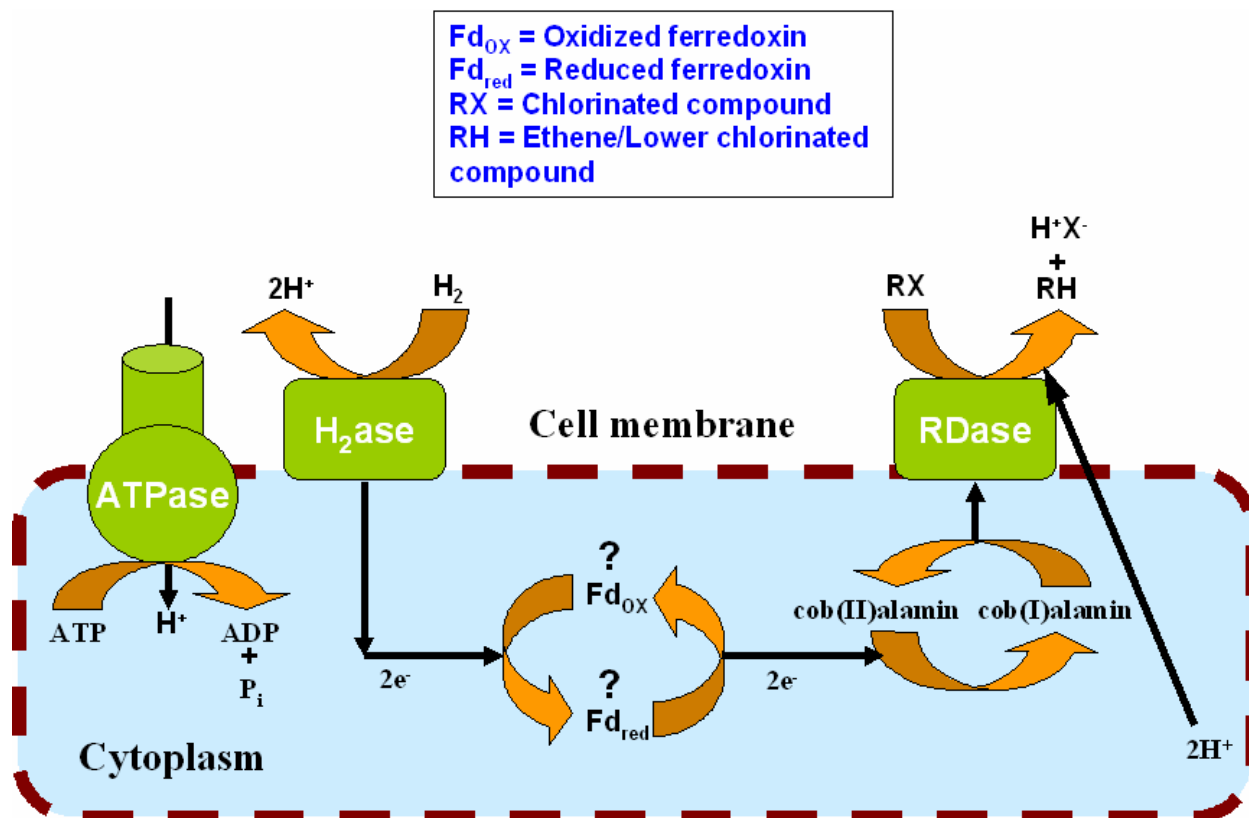

Figure 6. Tentative scheme for the electron transport chain of *Dehalococcoides*

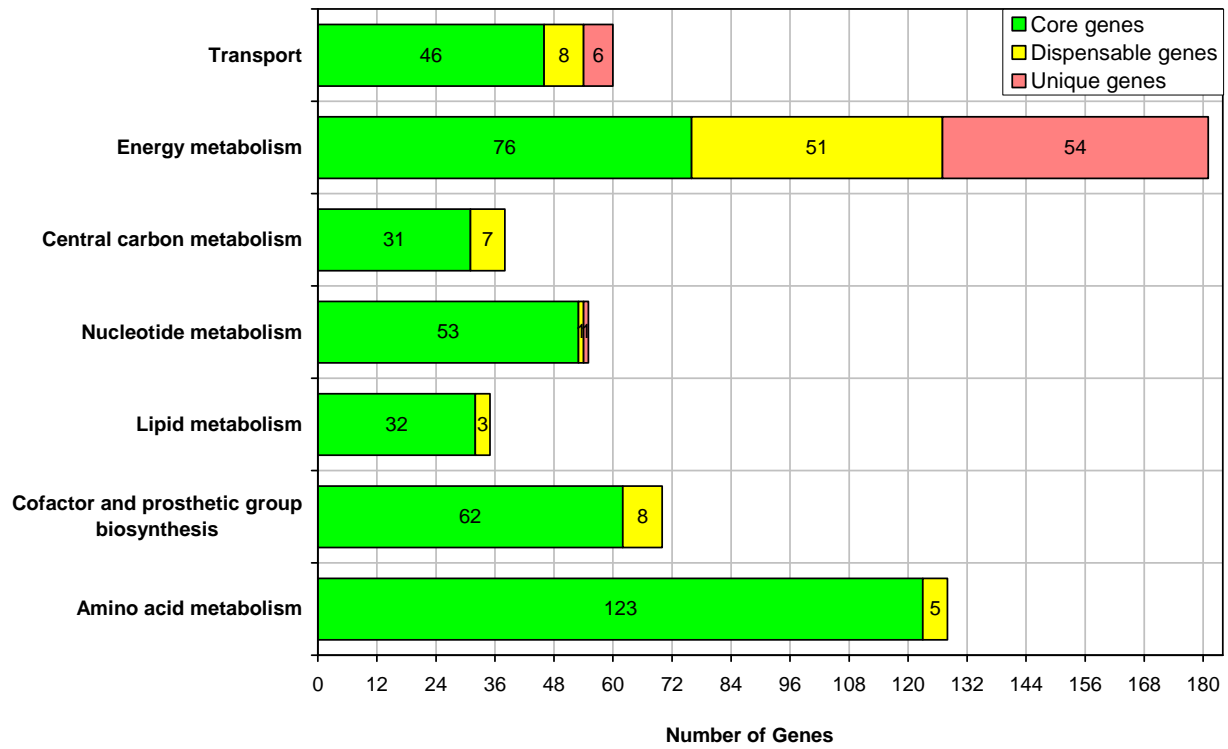

Figure 7. Distribution of metabolic genes in different subsystems of *iAI549*

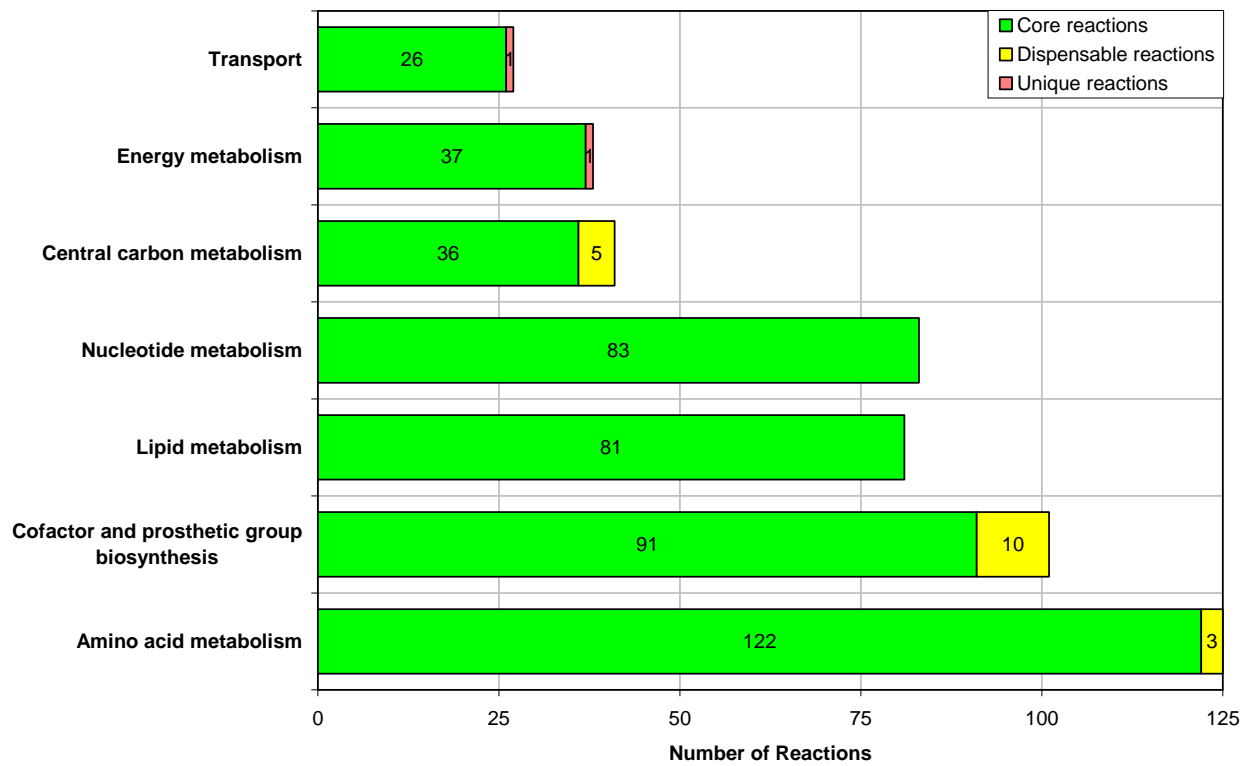

Figure 8. Distribution of gene-associated model reactions in different subsystems of *iAI549*

## References

1. Feist AM, Scholten JCM, Palsson BO, Brockman FJ, Ideker T (2006) Modelling methanogenesis with a genome-scale metabolic reconstruction of *Methanosarcina barkeri*. *Molecular Systems Biology* 2: 1-14.
2. Duhamel M, Edwards EA (2007) Growth and yields of dechlorinators, acetogens, and methanogens during reductive dechlorination of chlorinated ethenes and dihaloelimination of 1,2-Dichloroethane. *Environmental Science & Technology* 41: 2303-2310.
3. Jayachandran G, Gorisch H, Adrian L (2003) Dehalorespiration with hexachlorobenzene and pentachlorobenzene by *Dehalococcoides* sp. strain CBDB1. *Arch Microbiol* 180: 411-416.
4. Adrian L, Hansen SK, Fung JM, Gorisch H, Zinder SH (2007) Growth of *Dehalococcoides* strains with chlorophenols as electron acceptors. *Environmental Science & Technology* 41: 2318-2323.
5. Maymo-Gatell X, Chien Y-t, Gossett JM, Zinder SH (1997) Isolation of a bacterium that reductively dechlorinates tetrachloroethene to ethene. *Science* 276: 1568-1571.
6. He J, Ritalahti KM, Yang K-L, Koenigsberg SS, Löffler FE (2003) Detoxification of vinyl chloride to ethene coupled to growth of an anaerobic bacterium. *Nature* 424: 62-65.
7. He J, Sung Y, Brown RK, Ritalahti KM, Löffler FE (2005) Isolation and characterization of *Dehalococcoides* sp. strain FL2, a trichloroethene (TCE)- and 1,2- dechloroethene-respiring anaerobe. *Environmental Microbiology* 7: 1442-1450.
8. Sung Y, Ritalahti KM, Apkarian RP, Löffler FE (2006) Quantitative PCR confirms purity of strain GT, a novel trichloroethene-to-ethene-respiring *Dehalococcoides* isolate. *Applied and Environmental Microbiology* 72: 1980-1987.
9. Cupples AM, Spormann AM, McCarty PL (2003) Growth of a *Dehalococcoides* - like microorganism on vinyl chloride and cis - dichloroethene as electron acceptors as determined by competitive PCR. *Applied and Environmental Microbiology* 69: 953-959.
10. Duhamel M, Mo K, Edwards EA (2004) Characterization of a highly enriched *Dehalococcoides*-containing culture that grows on vinyl chloride and trichloroethene. *Applied and Environmental Microbiology* 70: 5538-5545.
11. Holmes VF, He J, Lee PKH, Alvarez-Cohen L (2006) Discrimination of multiple *Dehalococcoides* strains in a trichloroethene enrichment by quantification of their reductive dehalogenase genes. *Applied and Environmental Microbiology* 72: 5877-5883.
12. Bedard DL, Ritalahti KM, Löffler FE (2007) The *Dehalococcoides* population in sediment-free mixed cultures metabolically dechlorinates the commercial polychlorinated biphenyl mixture Aroclor 1260. *Applied and Environmental Microbiology* 73: 2513-2521.
13. Karadagli F, Rittmann BE (2005) Kinetic characterization of *Methanobacterium bryantii* M.o.H. *Environmental Science & Technology* 39: 4900-4905.
14. Cupples AM, Spormann AM, McCarty PL (2004) Vinyl chloride and cis-Dichloroethene dechlorination kinetics and microorganism growth under substrate limiting conditions. *Environmental Science & Technology* 38: 1102-1107.
15. Rittmann BE, McCarty PL (2001) *Environmental biotechnology: principles and applications*. New York: McGraw-Hill. 754 p.
16. Dolfing J, Janssen DB (1994) Estimates of Gibbs free energies of formation of chlorinated aliphatic compounds. *Biodegradation* 5: 21-28.

17. Dolfing J, Harrison BK (1992) Gibbs free energy of formation of halogenated aromatic compounds and their potential role as electron acceptors in anaerobic environments. *Environmental Science & Technology* 26: 2213-2218.
18. Hoffmann B, Oberhuber M, Stupperich E, Bothe H, Buckel W, et al. (2000) Native corrinoids from *Clostridium cochlearium* are adeninylcobamides: spectroscopic analysis and identification of pseudovitamin B(12) and factor A. *Journal of Bacteriology* 182: 4773-4782.
19. Stupperich E, Eisinger HJ, Kräutler B (1988) Diversity of corrinoids in acetogenic bacteria. P-cresolylcobamide from *Sporomusa ovata*, 5-methoxy-6-methylbenzimidazolylcobamide from *Clostridium formicoaceticum* and vitamin B12 from *Acetobacterium woodii*. *European Journal of Biochemistry* 172: 459-464.
20. Gorris L, van der Drift C (1994) Cofactor contents of methanogenic bacteria reviewed. *Biofactors* 4: 139-145.
21. Neidhardt FC, Ingraham JL, Schaechter M (1990) *Physiology of the bacterial cell: a molecular approach*. Sunderland, Massachusetts: Sinauer Associates, Inc.
22. Kube M, Beck A, Zinder SH, Kuhl H, Reinhardt R, et al. (2005) Genome sequence of the chlorinated compound respiring bacterium *Dehalococcoides* species strain CBDB1. *Nature Biotechnology* 23: 1269-1273.
23. Mahadevan R, Bond DR, Butler JE, Esteve-Nuñez A, Coppi MV, et al. (2006) Characterization of metabolism in the Fe (III)-reducing organism *Geobacter sulfurreducens* by constraint-based modeling. *Applied and Environmental Microbiology* 72: 1558-1568.
24. Pramanik J, Keasling JD (1997) Stoichiometric model of *Escherichia coli* metabolism: incorporation of growth-rate dependent biomass composition and mechanistic energy requirements. *Biotechnology and Bioengineering* 56: 398-421.
25. White DC, Geyer R, Peacock AD, Hedrick DB, Koenigsberg SS, et al. (2005) Phospholipid furan fatty acids and Ubiquinone-8: lipid biomarkers that may protect *Dehalococcoides* strains from free radicals. *Applied and Environmental Microbiology* 71: 8426-8433.
26. Simmonds A (2007) Dechlorination rates in KB-1, a commercial trichloroethylene degrading bacterial culture. MASC Thesis [MASC Thesis]. Toronto ON Canada: University of Toronto.
27. Pirt SJ (1965) The maintenance of bacteria in growing cultures. *Proceedings of the Royal Society of London, Series B: Biological Sciences* 163: 224-231.
28. Pirt SJ (1982) Maintenance energy: a general model for energy-limited and energy-sufficient growth. *Arch Microbiol* 133: 300-302.
29. Russell JB, Cook GM (1995) Energetics of bacterial growth: balance of anabolic and catabolic reactions. *Microbiological Reviews* 59: 48-62.
30. Holscher T, Gorisch H, Adrian L (2003) Reductive dehalogenation of chlorobenzene congeners in cell extracts of *Dehalococcoides* sp. strain CBDB1. *Applied and Environmental Microbiology* 69: 2999-3001.
31. Jayachandran G, Gorisch H, Adrian L (2004) Studies on hydrogenase activity and chlorobenzene respiration in *Dehalococcoides* sp. strain CBDB1. *Arch Microbiol* 182: 498-504.
32. Nijenhuis I, Zinder SH (2005) Characterization of hydrogenase and reductive dehalogenase activities of *Dehalococcoides ethenogenes* strain 195. *Applied and Environmental Microbiology* 71: 1664-1667.

33. Holliger C, Wohlfarth G, Diekert G (1999) Reductive dechlorination in the energy metabolism of anaerobic bacteria. *FEMS Microbiology Reviews* 22: 383-398.
34. Krasotkina J, Walters T, Maruya KA, Ragsdale SW (2001) Characterization of the B12 and iron-sulfur-containing reductive dehalogenase from *Desulfotobacterium chlororespirans*. *The Journal of Biological Chemistry* 276: 40991-40997.
35. Miller E, Wohlfarth G, Diekert G (1997) Studies on tetrachloroethene respiration in *Dehalospirillum multivorans*. *Arch Microbiol* 166: 379-387.
36. Banerjee R, Ragsdale SW (2003) The many faces of vitamin B12: catalysis by cobalamin-dependent enzymes. *Annual Review of Biochemistry* 72: 209-247.
37. Kroger A, Biel S, Simon J, Gross R, Unden G, et al. (2002) Fumarate respiration of *Wolinella succinogens*: enzymology, energetics and coupling mechanism. *Biochimica et Biophysica Acta* 1553: 23-38.
38. Louie TM, Mohn WW (1999) Evidence for a chemiosmotic model of dehalorespiration in *Desulfomonile tiedjei* DCB-1. *Journal of Bacteriology* 181: 40-46.
39. Schumacher W, Holliger C (1996) The proton/electron ration of the menaquinone-dependent electron transport from dihydrogen to tetrachloroethene in "*Dehalobacter restrictus*". *Journal of Bacteriology* 178: 2328-2333.
40. Thauer RK, Jungermann K, Decker K (1977) Energy conservation in chemotrophic anaerobic bacteria. *Bacteriological reviews* 41: 100-180.
41. Bruschi M, Guerlesquin F (1988) Structure, function and evolution of bacterial ferredoxins. *FEMS Microbiology Reviews* 54: 155-176.
42. Valentine RC (1964) Bacterial ferredoxin. *Bacteriological reviews* 28: 497-517.
43. Valentine RC, Wolfe RS (1963) Role of ferredoxin in the metabolism of molecular hydrogen. *Journal of Bacteriology* 85: 1114-1120.
44. Eisenstein KK, Wang JH (1969) Conversion of light to chemical free energy. *The Journal of Biological Chemistry* 244: 1720-1728.
45. Sterner R (2001) Ferredoxin from *Thermotoga maritima*. *Methods in Enzymology* 334: 23-30.
46. Holscher T, Brown RK, Ritalahti KM, Wintzingerode Fv, Gorisch H, et al. (2004) Multiple nonidentical reductive-dehalogenase-homologous genes are common in *Dehalococcoides*. *Applied and Environmental Microbiology* 70: 5290-5297.
47. Thauer RK, Kaster A-K, Seedorf H, Buckel W, Hedderich R (2008) Methanogenic archaea: ecologically relevant differences in energy conservation. *Nature Reviews: Microbiology* 6: 579-591.
48. Schut GJ, Adams MWW (2009) The iron-hydrogenase of *Thermotoga maritima* utilizes ferredoxin and NADH synergistically: a new perspective on anaerobic hydrogen production. *Journal of Bacteriology* 191: 4451-4457.
49. Deppenmeier U (2002) Redox-driven proton translocation in methanogenic Archaea. *Cellular and Molecular Life Sciences* 59: 1513-1533.
50. Deppenmeier U (2004) The membrane-bound electron transport system of *Methanosarcina* species. *Journal of Bioenergetics and Biomembranes* 36: 55-64.
51. Hedderich R (2004) Energy-converting [NiFe] hydrogenases from archaea and extremophiles: ancestors of complex I. *Journal of Bioenergetics and Biomembranes* 36: 65-75.

52. Harold FM, Maloney PC (1996) Energy transduction by ion currents. In: Neidhardt FC, Curtiss R, Ingraham JL, Lin ECC, Low KB et al., editors. *Escherichia coli* and *Salmonella* Cellular and molecular biology. Washington, D. C.: ASM Press. pp. 283-306.
53. Jayachandran G (2004) Physiological and enzymatic studies of respiration in *Dehalococcoides* species strain CBDB1. PhD Thesis. [PhD]: Technischen Universität Berlin, Germany.
54. Loubiere P, Lindely ND (1991) The use of acetate as additional co- substrate improves methylotropic growth of the acetogenic anaerobe *Eubacterium limosum* when CO<sub>2</sub> fixation is rate limiting. *Journal of General Microbiology* 137: 2247-2251.
55. Tang YJ, Yi S, Zhuang W-Q, Zinder SH, Keasling JD, et al. (2009) Investigation of carbon metabolism in “*Dehalococcoides ethenogenes*” strain 195 using isotopomer and transcriptomic analyses. *Journal of Bacteriology* 191: 5224-5231.
